# Supplementary material for: Electrochemically Induced Synthesis of Imidazoles from Vinyl Azides and Benzyl Amines
Source: MDPI journal article supplement (doi:10.3390/molecules27227721), 2022-11-09

## SUPPORTING INFORMATION

### Electrochemically induced synthesis of imidazoles from vinyl azides and benzyl amines

*Vera A. Vil', Sergei S. Grishin, Alexander O. Terent'ev\**

N. D. Zelinsky Institute of Organic Chemistry, Russian Academy of Sciences, 47 Leninsky Prospekt, Moscow, 119991, Russian Federation. E-mail: alterex@yandex.ru, terentev@ioc.ac.ru

#### Table of content

|                                                                     |     |
|---------------------------------------------------------------------|-----|
| General materials and methods .....                                 | S2  |
| Synthesis of starting compounds .....                               | S2  |
| Electrochemical cell .....                                          | S2  |
| Table S1. Detailed optimization of imidazole electrosynthesis ..... | S3  |
| Experimental Procedures for Table S1.....                           | S5  |
| General Experimental Procedure for Schemes 2, 3. ....               | S9  |
| CV study .....                                                      | S16 |
| Experimental Procedures for Scheme 4.....                           | S17 |
| Experimental Procedures for Scheme 5.....                           | S17 |
| References .....                                                    | S18 |
| NMR spectra of synthesized compounds .....                          | S19 |
| HRMS spectra of synthesized compounds.....                          | S54 |
| IR spectra of synthesized compounds.....                            | S71 |

## General materials and methods

$^1\text{H}$  and  $^{13}\text{C}$  NMR spectra were recorded on Bruker AVANCE II 300 spectrometer (300.13 and 75.48 MHz, respectively) in  $\text{CDCl}_3$ . Chemical shifts were reported in parts per million (ppm), and the residual solvent peak was used as an internal reference:  $^1\text{H}$  ( $\text{CDCl}_3$   $\delta$ =7.25 ppm),  $^{13}\text{C}$  ( $\text{CDCl}_3$   $\delta$ =77.00 ppm). Multiplicity was indicated as follows: s (singlet), d (doublet), t (triplet), q (quartet), sept (septet), m (multiplet).

High resolution mass spectra (HR-MS) were measured on a Bruker micrOTOF II instrument using electrospray ionization (ESI). The measurements were performed in a positive ion mode (interface capillary voltage - 4500 V); mass range from  $m/z$  50 to  $m/z$  3000 Da; external calibration with Electrospray Calibrant Solution (Fluka). A syringe injection was used for all acetonitrile solutions (flow rate 3  $\mu\text{L}/\text{min}$ ). Nitrogen was applied as a dry gas; interface temperature was set at 180  $^\circ\text{C}$ .

FT-IR spectra were recorded on Bruker Alpha instrument.

The TLC analysis was carried out on standard silica gel chromatography plates (DC-Fertigfolien ALUGRAM<sup>R</sup> Xtra SIL G/UV<sub>254</sub>). Column chromatography was performed using silica gel (0.040-0.060 mm, 60 Å).

DMF, *p*-TsOH·H<sub>2</sub>O, TBAI, KI, NH<sub>4</sub>I, NH<sub>4</sub>Br, LiClO<sub>4</sub>, AcOH, HCOOH, H<sub>2</sub>SO<sub>4</sub>, CH<sub>3</sub>SO<sub>3</sub>H, Amberlyst-15, Lewatit MonoPlus SP-112-H, *p*-chlorobenzene were purchased from commercial sources and were used as is. All solvents were distilled before use using standard procedures.

## Synthesis of starting compounds

(1-Azidovinyl)benzene (**1a**), 1-(1-azidovinyl)-4-methylbenzene (**1b**), 1-(1-azidovinyl)-4-tertbutylbenzene (**1c**), 1-(1-azidovinyl)-3-methylbenzene (**1d**), 1-(1-azidovinyl)-4-methoxybenzene (**1e**), 1-(1-azidovinyl)-4-fluorobenzene (**1f**), 1-(1-azidovinyl)-4-bromobenzene (**1g**), 1-(1-azidovinyl)-3-bromobenzene (**1h**), 1-(1-azidovinyl)-2-chlorobenzene (**1i**) were synthesized according to the literature through the bromination of corresponding styrenes followed by the reaction of dibromides with  $\text{NaN}_3$ .<sup>1</sup> 1-(Azidomethyl)-4-(1-azidovinyl)benzene (**1j**) was synthesized according the same procedure<sup>1</sup> from 1-(chloromethyl)-4-vinylbenzene as a result of simultaneous azidation of formed dibromide and nucleophilic substitution of chlorine atom. 2-Azidododec-1-ene was synthesized according to the literature through the reaction between styrenes and  $\text{I}_2/\text{NaN}_3$  system followed by dehydroiodination with *t*-BuOK.<sup>2</sup>

Amines **2** were obtained from commercial suppliers and used without further purification.

## Electrochemical cell

For the electrosynthesis glassy carbon and platinum plates from Russian commercial suppliers were used as electrodes (glassy carbon: CY-2000: TY 1916-027-27208846-01; platinum grade: AISI 304): The reactions were performed in a common chemical tube:

Undivided electrochemical cell equipped with glassy carbon plate anode and platinum plate cathode with the reaction mixture during electrolysis under constant current conditions.

Before all electrochemical reactions the electrodes were put into 5 M solution of KOH and this mixture was electrolyzed for 10 minutes at  $j = 200 \text{ mA/cm}^2$ . After that the polarity of electrodes was changed and the mixture was electrolyzed under these conditions again. After electrolysis the electrodes were washed with running water and then with acetone. All these procedures help to clean the electrodes from the impurities from the previous electrolysis.

The detailed electrochemical equipment was presented in our previous study [*Adv. Synth. Catal.* **2022**, *364* (6), 1098-1108].

**Table S1. Detailed optimization of imidazole electrosynthesis.**

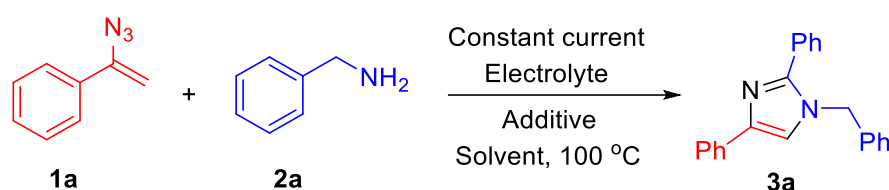

| No              | Cathode /Anode | Electrolyte (eq)               | Additive (eq.)                            | Solvent     | Current density, mA/cm <sup>2</sup> | Electricity passed per <b>1a</b> , F/mol | Yield <b>3a</b> % |
|-----------------|----------------|--------------------------------|-------------------------------------------|-------------|-------------------------------------|------------------------------------------|-------------------|
| 1               | Pt/GC          | <b>TBAI (1.0)</b>              | -                                         | DMF         | 10.0                                | 4.0                                      | 24                |
| 2               | Pt/GC          | <b>KI (1.0)</b>                | -                                         | DMF         | 10.0                                | 4.0                                      | 37                |
| 3               | Pt/GC          | <b>NH<sub>4</sub>I (1.0)</b>   | -                                         | DMF         | 10.0                                | 4.0                                      | 36                |
| 4               | Pt/GC          | <b>NH<sub>4</sub>Br (1.0)</b>  | -                                         | DMF         | 10.0                                | 4.0                                      | 26                |
| 5               | Pt/GC          | <b>LiClO<sub>4</sub> (1.0)</b> | -                                         | DMF         | 10.0                                | 4.0                                      | 22                |
| 7               | Pt/GC          | KI (1.0)                       | -                                         | <b>DMA</b>  | 10.0                                | 4.0                                      | 37                |
| 8               | Pt/GC          | KI (1.0)                       | -                                         | <b>DMSO</b> | 10.0                                | 4.0                                      | 36                |
| 9 <sup>b</sup>  | Pt/GC          | KI (1.0)                       | -                                         | DMF         | 10.0                                | 4.0                                      | 26                |
| 10 <sup>c</sup> | Pt/GC          | KI (1.0)                       | -                                         | DMF         | 10.0                                | 4.0                                      | 26                |
| 11 <sup>d</sup> | Pt/GC          | KI (1.0)                       | -                                         | DMF         | 10.0                                | 4.0                                      | 33                |
| 12              | Pt/GC          | KI (1.0)                       | <b><i>p</i>-TsOH·H<sub>2</sub>O (0.5)</b> | DMF         | 10.0                                | 4.0                                      | 38                |
| 13              | Pt/GC          | KI (1.0)                       | <b><i>p</i>-TsOH·H<sub>2</sub>O (1.0)</b> | DMF         | 10.0                                | 4.0                                      | 43                |
| 14              | Pt/GC          | KI (1.0)                       | <b><i>p</i>-TsOH·H<sub>2</sub>O (2.0)</b> | DMF         | 10.0                                | 4.0                                      | 48                |
| 15              | Pt/GC          | KI (1.0)                       | <b><i>p</i>-TsOH·H<sub>2</sub>O (3.0)</b> | DMF         | 10.0                                | 4.0                                      | 21                |
| 16              | Pt/GC          | KI (1.0)                       | <b>AcOH (2.0)</b>                         | DMF         | 10.0                                | 4.0                                      | 40                |
| 17              | Pt/GC          | KI (1.0)                       | <b>HCOOH (2.0)</b>                        | DMF         | 10.0                                | 4.0                                      | 32                |

|                 |              |                 |                                                                                                  |                         |             |            |        |
|-----------------|--------------|-----------------|--------------------------------------------------------------------------------------------------|-------------------------|-------------|------------|--------|
| 18              | Pt/GC        | KI (1.0)        | <i>p</i> -TsOH·H <sub>2</sub> O<br>(2.0)                                                         | DMF                     | 10.0        | <b>5.0</b> | 41     |
| 19              | Pt/GC        | KI (1.0)        | <i>p</i> -TsOH·H <sub>2</sub> O<br>(2.0)                                                         | DMF                     | <b>20.0</b> | 4.0        | 39     |
| 20              | Pt/GC        | KI (1.0)        | <i>p</i> -TsOH·H <sub>2</sub> O<br>(2.0)                                                         | DMF                     | <b>26.7</b> | 4.0        | 26     |
| 21              | Pt/GC        | KI (1.0)        | <i>p</i> -TsOH·H <sub>2</sub> O<br>(2.0)                                                         | DMF                     | 20.0        | <b>6.0</b> | 55     |
| 22              | Pt/GC        | KI (1.0)        | <i>p</i> -TsOH·H <sub>2</sub> O<br>(2.0)                                                         | DMF                     | 20.0        | <b>8.0</b> | 30     |
| 23              | Pt/GC        | KI (1.0)        | <i>p</i> -TsOH·H <sub>2</sub> O<br>(2.0)                                                         | DMF                     | -           | -          | 7      |
| 24              | -            | KI (1.0)        | <i>p</i> -TsOH·H <sub>2</sub> O<br>(2.0)                                                         | DMF                     | -           | -          | 7      |
| 25              | Pt/GC        | KI (1.0)        | <i>p</i> -TsOH·H <sub>2</sub> O<br>(2.0)<br><i>n</i> -Bu <sub>4</sub> NClO <sub>4</sub><br>(1.0) | <b>PhCl</b>             | 20.0        | 6.0        | 18     |
| 26              | Pt/GC        | <b>KI (0.5)</b> | <i>p</i> -TsOH·H <sub>2</sub> O<br>(2.0)                                                         | DMF                     | 20.0        | 6.0        | 25     |
| 27              | Pt/GC        | <b>KI (2.0)</b> | <i>p</i> -TsOH·H <sub>2</sub> O<br>(2.0)                                                         | DMF                     | 20.0        | 6.0        | 53     |
| 28              | Pt/GC        | KI (1.0)        | <b>H<sub>2</sub>SO<sub>4</sub> (2.0)</b>                                                         | DMF                     | 20.0        | 6.0        | -      |
| 29              | Pt/GC        | KI (1.0)        | <b>CH<sub>3</sub>SO<sub>3</sub>H<br/>(2.0)</b>                                                   | DMF                     | 20.0        | 6.0        | -      |
| 30              | Pt/GC        | KI (1.0)        | <b>Amberlyst-<br/>15 (2.0)</b>                                                                   | DMF                     | 20.0        | 6.0        | 46     |
| 31              | Pt/GC        | KI (1.0)        | <b>Lewatit<br/>MonoPlus<br/>SP-112-H<br/>(2.0)</b>                                               | DMF                     | 20.0        | 6.0        | traces |
| 32 <sup>e</sup> | Pt/GC        | KI (1.0)        | <i>p</i> -TsOH·H <sub>2</sub> O<br>(2.0)                                                         | <b>CH<sub>3</sub>CN</b> | 20.0        | 6.0        | 7      |
| 33 <sup>e</sup> | Pt/GC        | KI (1.0)        | <i>p</i> -TsOH·H <sub>2</sub> O<br>(2.0)                                                         | <b>MeOH</b>             | 20.0        | 6.0        | traces |
| 34 <sup>f</sup> | Pt/GC        | KI (1.0)        | <i>p</i> -TsOH·H <sub>2</sub> O<br>(2.0)                                                         | DMF                     | 20.0        | 6.0        | 61     |
| 35 <sup>g</sup> | Pt/GC        | KI (1.0)        | <i>p</i> -TsOH·H <sub>2</sub> O<br>(2.0)                                                         | DMF                     | 20.0        | 6.0        | 31     |
| 36              | <b>GC/GC</b> | KI (1.0)        | <i>p</i> -TsOH·H <sub>2</sub> O<br>(2.0)                                                         | DMF                     | 20.0        | 6.0        | 15     |
| 37              | <b>Pt/Pt</b> | KI (1.0)        | <i>p</i> -TsOH·H <sub>2</sub> O<br>(2.0)                                                         | DMF                     | 20.0        | 6.0        | 22     |
| 38              | <b>Pt/C</b>  | KI (1.0)        | <i>p</i> -TsOH·H <sub>2</sub> O<br>(2.0)                                                         | DMF                     | 20.0        | 6.0        | 36     |
| 39              | <b>Cu/GC</b> | KI (1.0)        | <i>p</i> -TsOH·H <sub>2</sub> O<br>(2.0)                                                         | DMF                     | 20.0        | 6.0        | 35     |
| 40              | <b>SS/GC</b> | KI (1.0)        | <i>p</i> -TsOH·H <sub>2</sub> O<br>(2.0)                                                         | DMF                     | 20.0        | 6.0        | 34     |
| 41              | <b>Ni/GC</b> | KI (1.0)        | <i>p</i> -TsOH·H <sub>2</sub> O<br>(2.0)                                                         | DMF                     | 20.0        | 6.0        | 48     |

|    |       |          |                                          |     |      |     |    |
|----|-------|----------|------------------------------------------|-----|------|-----|----|
| 42 | GC/Pt | KI (1.0) | <i>p</i> -TsOH·H <sub>2</sub> O<br>(2.0) | DMF | 20.0 | 6.0 | 46 |
|----|-------|----------|------------------------------------------|-----|------|-----|----|

<sup>a</sup> **General reaction conditions:** undivided cell, glassy carbon plate anode / platinum plate cathode (3 cm<sup>2</sup>), constant current, **1a** (1.0 mmol, 145.2 mg), **2a** (2.0 mmol, 214.3 mg), solvent (10.0 mL), 100 °C, air atmosphere. <sup>b</sup> 20–25 °C, <sup>c</sup> 120 °C, <sup>d</sup> **2a** (4.0 mmol, 428.8 mg), <sup>e</sup> 25 °C, <sup>f</sup> 70 °C, <sup>g</sup> 50 °C

## Experimental Procedures for Table S1.

### Experimental Procedure for Table S1, entries 1–5.

An undivided cell was equipped with a glassy carbon anode (3 cm<sup>2</sup>) and a platinum plate cathode (3 cm<sup>2</sup>) and connected to a DC regulated power supply. The solution of (1-azidovinyl)benzene **1a** (1.0 mmol, 145.2 mg, 1.0 eq.), benzylamine **2a** (2.0 mmol, 214.3 mg, 2.0 eq.) and supporting electrolyte TBAI, KI, NH<sub>4</sub>I, NH<sub>4</sub>Br, LiClO<sub>4</sub> (1.0 mmol, 1.0 eq.) in 10 mL of DMF was electrolyzed using constant current conditions at 100 °C under magnetic stirring for 215 min with *I* = 30 mA. After that the reaction mixture was diluted with H<sub>2</sub>O (30 mL) and washed with mixture of PE and ethyl acetate (1:1) (2×30 mL). Combined organic layer was washed with 0.3 M solution of Na<sub>2</sub>S<sub>2</sub>O<sub>3</sub> (2×10 mL), water (2×10 mL), dried over Na<sub>2</sub>SO<sub>4</sub> and concentrated under reduced pressure using a rotary evaporator (15–20 mmHg), (bath temperature, ca. 30–40 °C). Product **3a** was isolated by chromatography on SiO<sub>2</sub> (PE:EtOAc = from 15:1 to 2:1).

### Experimental Procedure for Table S1, entries 9–10.

An undivided cell was equipped with a glassy carbon anode (3 cm<sup>2</sup>) and a platinum plate cathode (3 cm<sup>2</sup>) and connected to a DC regulated power supply. The solution of (1-azidovinyl)benzene **1a** (1.0 mmol, 145.2 mg, 1.0 eq.), benzylamine **2a** (2.0 mmol, 214.3 mg, 2.0 eq.) and KI (1.0 mmol, 166.0 mg, 1.0 eq.) in 10 mL of DMF was electrolyzed using constant current conditions at 25 °C (entry 9) or 120 °C (entry 10) under magnetic stirring for 215 min with *I* = 30 mA. After that the reaction mixture was diluted with H<sub>2</sub>O (30 mL) and washed with mixture of PE and ethyl acetate (1:1) (2×30 mL). Combined organic layer was washed with 0.3 M solution of Na<sub>2</sub>S<sub>2</sub>O<sub>3</sub> (2×10 mL), water (2×10 mL), dried over Na<sub>2</sub>SO<sub>4</sub> and concentrated under reduced pressure using a rotary evaporator (15–20 mmHg), (bath temperature, ca. 30–40 °C). Product **3a** was isolated by chromatography on SiO<sub>2</sub> (PE:EtOAc = from 15:1 to 2:1).

### Experimental Procedure for Table S1, entries 11.

An undivided cell was equipped with a glassy carbon anode (3 cm<sup>2</sup>) and a platinum plate cathode (3 cm<sup>2</sup>) and connected to a DC regulated power supply. The solution of (1-azidovinyl)benzene **1a** (1.0 mmol, 145.2 mg, 1.0 eq.), benzylamine **2a** (4.0 mmol, 428.8 mg, 4.0 eq.) KI (1.0 mmol, 166.0 mg, 1.0 eq.) in 10 mL of DMF was electrolyzed using constant current conditions at 100 °C under magnetic stirring for 215 min with *I* = 30 mA. After that the reaction mixture was diluted with H<sub>2</sub>O (30 mL) and washed with mixture of PE and ethyl acetate (1:1) (2×30 mL). Combined organic layer was washed with 0.3 M solution of Na<sub>2</sub>S<sub>2</sub>O<sub>3</sub> (2×10 mL), water (2×10 mL), dried over Na<sub>2</sub>SO<sub>4</sub> and concentrated under

reduced pressure using a rotary evaporator (15-20 mmHg), (bath temperature, ca. 30–40 °C). Product **3a** was isolated by chromatography on SiO<sub>2</sub> (PE:EtOAc = from 15:1 to 2:1).

**Experimental Procedure for Table S1, entries 12-17.**

An undivided cell was equipped with a glassy carbon anode (3 cm<sup>2</sup>) and a platinum plate cathode (3 cm<sup>2</sup>) and connected to a DC regulated power supply. The solution of (1-azidovinyl)benzene **1a** (1.0 mmol, 145.2 mg, 1.0 eq.), benzylamine **2a** (2.0 mmol, 214.3 mg, 2.0 eq.), additive *p*-TsOH·H<sub>2</sub>O, AcOH, HCOOH (0.5-3.0 mmol, 0.5-3.0 eq.), and KI (1.0 mmol, 166.0 mg, 1.0 eq.) in 10 mL of DMF was electrolyzed using constant current conditions at 100 °C under magnetic stirring for 215 min with *I* = 30 mA. After that the reaction mixture was diluted with H<sub>2</sub>O (30 ml) and washed with mixture of PE and ethyl acetate (1:1) (2×30 mL). Combined organic layer was washed with 0.3 M solution of Na<sub>2</sub>S<sub>2</sub>O<sub>3</sub> (2×10 mL), water (2×10 mL), dried over Na<sub>2</sub>SO<sub>4</sub> and concentrated under reduced pressure using a rotary evaporator (15-20 mmHg), (bath temperature, ca. 30–40 °C). Product **3a** was isolated by chromatography on SiO<sub>2</sub> (PE:EtOAc = from 15:1 to 2:1).

**Experimental Procedure for Table S1, entries 18-22.**

An undivided cell was equipped with a glassy carbon anode (3 cm<sup>2</sup>) and a platinum plate cathode (3 cm<sup>2</sup>) and connected to a DC regulated power supply. The solution of (1-azidovinyl)benzene **1a** (1.0 mmol, 145.2 mg, 1.0 eq.), benzylamine **2a** (2.0 mmol, 214.3 mg, 2.0 eq.), *p*-TsOH·H<sub>2</sub>O (2.0 mmol, 380.0 mg, 2.0 eq.), and KI (1.0 mmol, 166.0 mg, 1.0 eq.) in 10 mL of DMF was electrolyzed using constant current conditions at 100 °C under magnetic stirring for 270 min with *I* = 30 mA (entry 18); 110 min with *I* = 60 mA (entry 19); 80 min with *I* = 80 mA (entry 20); 160 min with *I* = 60 mA (entry 21) or 215 min with *I* = 60 mA (entry 22). After that the reaction mixture was diluted with H<sub>2</sub>O (30 ml) and washed with mixture of PE and ethyl acetate (1:1) (2×30 mL). Combined organic layer was washed with 0.3 M solution of Na<sub>2</sub>S<sub>2</sub>O<sub>3</sub> (2×10 mL), water (2×10 mL), dried over Na<sub>2</sub>SO<sub>4</sub> and concentrated under reduced pressure using a rotary evaporator (15-20 mmHg), (bath temperature, ca. 30–40 °C). Product **3a** was isolated by chromatography on SiO<sub>2</sub> (PE:EtOAc = from 15:1 to 2:1).

**Experimental Procedure for Table S1, entries 23.**

An undivided cell was equipped with a glassy carbon anode (3 cm<sup>2</sup>) and a platinum plate cathode (3 cm<sup>2</sup>). The solution of (1-azidovinyl)benzene **1a** (1.0 mmol, 145.2 mg, 1.0 eq.), benzylamine **2a** (2.0 mmol, 214.3 mg, 2.0 eq.), *p*-TsOH·H<sub>2</sub>O (2.0 mmol, 380.0 mg, 2.0 eq.) and KI (1.0 mmol, 166.0 mg, 1.0 eq.) in 10 mL of DMF was stirred at 100 °C for 160 min. After that the reaction mixture was diluted with H<sub>2</sub>O (30 ml) and washed with mixture of PE and ethyl acetate (1:1) (2×30 mL). Combined organic layer was washed with 0.3 M solution of Na<sub>2</sub>S<sub>2</sub>O<sub>3</sub> (2×10 mL), water (2×10 mL), dried over Na<sub>2</sub>SO<sub>4</sub> and concentrated under reduced pressure using a rotary evaporator (15-20 mmHg), (bath temperature, ca. 30–40 °C). Product **3a** was isolated by chromatography on SiO<sub>2</sub> (PE:EtOAc = from 15:1 to 2:1).

**Experimental Procedure for Table S1, entries 24.**

The solution of (1-azidovinyl)benzene **1a** (1.0 mmol, 145.2 mg, 1.0 eq.), benzylamine **2a** (2.0 mmol, 214.3 mg, 2.0 eq.), *p*-TsOH·H<sub>2</sub>O (2.0 mmol, 380.0 mg, 2.0 eq.), and KI (1.0 mmol, 166.0 mg, 1.0 eq.) in 10 mL of DMF was stirred at 100 °C for 160 min. After that the reaction mixture was diluted with H<sub>2</sub>O

(30 ml) and washed with mixture of PE and ethyl acetate (1:1) (2×30 mL). Combined organic layer was washed with 0.3 M solution of Na<sub>2</sub>S<sub>2</sub>O<sub>3</sub> (2×10 mL), water (2×10 mL), dried over Na<sub>2</sub>SO<sub>4</sub> and concentrated under reduced pressure using a rotary evaporator (15-20 mmHg), (bath temperature, ca. 30–40 °C). Product **3a** was isolated by chromatography on SiO<sub>2</sub> (PE:EtOAc = from 15:1 to 2:1).

**Experimental Procedure for Table S1, entries 25.**

An undivided cell was equipped with a glassy carbon anode (3 cm<sup>2</sup>) and a platinum plate cathode (3 cm<sup>2</sup>) and connected to a DC regulated power supply. The solution of (1-azidovinyl)benzene **1a** (1.0 mmol, 145.2 mg, 1.0 eq.), benzylamine **2a** (2.0 mmol, 214.3 mg, 2.0 eq.), *p*-TsOH·H<sub>2</sub>O (2.0 mmol, 380.0 mg, 2.0 eq.), KI (1.0 mmol, 166.0 mg, 1.0 eq.), and *n*-Bu<sub>4</sub>NClO<sub>4</sub> (1.0 mmol, 314.9 mg, 1.0 eq.) in 10 mL of chlorobenzene was electrolyzed using constant current conditions at 100 °C under magnetic stirring for 160 min with *I* = 60 mA. After that the reaction mixture was diluted with H<sub>2</sub>O (30 ml) and washed with mixture of PE and ethyl acetate (1:1) (2×30 mL). Combined organic layer was washed with 0.3 M solution of Na<sub>2</sub>S<sub>2</sub>O<sub>3</sub> (2×10 mL), water (2×10 mL), dried over Na<sub>2</sub>SO<sub>4</sub> and concentrated under reduced pressure using a rotary evaporator (15-20 mmHg), (bath temperature, ca. 30–40 °C). Product **3a** was isolated by chromatography on SiO<sub>2</sub> (PE:EtOAc = from 15:1 to 2:1).

**Experimental Procedure for Table S1, entries 26, 27.**

An undivided cell was equipped with a glassy carbon anode (3 cm<sup>2</sup>) and a platinum plate cathode (3 cm<sup>2</sup>) and connected to a DC regulated power supply. The solution of (1-azidovinyl)benzene **1a** (1.0 mmol, 145.2 mg, 1.0 eq.), benzylamine **2a** (2.0 mmol, 214.3 mg, 2.0 eq.), *p*-TsOH·H<sub>2</sub>O (2.0 mmol, 380.0 mg, 2.0 eq.), and KI (0.5 – 2.0 mmol, 0.5 – 2.0 eq.) in 10 mL of DMF was electrolyzed using constant current conditions at 100 °C under magnetic stirring for 160 min with *I* = 60 mA. After that the reaction mixture was diluted with H<sub>2</sub>O (30 ml) and washed with mixture of PE and ethyl acetate (1:1) (2×30 mL). Combined organic layer was washed with 0.3 M solution of Na<sub>2</sub>S<sub>2</sub>O<sub>3</sub> (2×10 mL), water (2×10 mL), dried over Na<sub>2</sub>SO<sub>4</sub> and concentrated under reduced pressure using a rotary evaporator (15-20 mmHg), (bath temperature, ca. 30–40 °C). Product **3a** was isolated by chromatography on SiO<sub>2</sub> (PE:EtOAc = from 15:1 to 2:1).

**Experimental Procedure for Table S1, entries 28-31.**

An undivided cell was equipped with a glassy carbon anode (3 cm<sup>2</sup>) and a platinum plate cathode (3 cm<sup>2</sup>) and connected to a DC regulated power supply. The solution of (1-azidovinyl)benzene **1a** (1.0 mmol, 145.2 mg, 1.0 eq.), benzylamine **2a** (2.0 mmol, 214.3 mg, 2.0 eq.), additive H<sub>2</sub>SO<sub>4</sub>, CH<sub>3</sub>SO<sub>3</sub>H, Amberlist-15, or Lewatit MonoPlus SP-112-H (2.0 mmol, 2.0 eq.), and KI (1.0 mmol, 166.0 mg, 1.0 eq.) in 10 mL of DMF was electrolyzed using constant current conditions at 100 °C under magnetic stirring for 160 min with *I* = 60 mA. After that the reaction mixture was diluted with H<sub>2</sub>O (30 ml) and washed with mixture of PE and ethyl acetate (1:1) (2×30 mL). Combined organic layer was washed with 0.3 M solution of Na<sub>2</sub>S<sub>2</sub>O<sub>3</sub> (2×10 mL), water (2×10 mL), dried over Na<sub>2</sub>SO<sub>4</sub> and concentrated under reduced pressure using a rotary evaporator (15-20 mmHg), (bath temperature, ca. 30–40 °C). Product **3aa** was not detected (entries 28-29). Product **3a** was isolated by chromatography on SiO<sub>2</sub> (PE:EtOAc = from 15:1 to 2:1) (entry 30).

**Experimental Procedure for Table S1, entries 32,33.**

An undivided cell was equipped with a glassy carbon anode (3 cm<sup>2</sup>) and a platinum plate cathode (3 cm<sup>2</sup>) and connected to a DC regulated power supply. The solution of (1-azidovinyl)benzene **1a** (1.0 mmol, 145.2 mg, 1.0 eq.), benzylamine **2a** (2.0 mmol, 214.3 mg, 2.0 eq.), *p*-TsOH·H<sub>2</sub>O (2.0 mmol, 380.0 mg, 2.0 eq.), and KI (0.5 – 2.0 mmol, 0.5 – 2.0 eq.) in 10 mL of CH<sub>3</sub>CN (entry 32) or MeOH (entry 33) was electrolyzed using constant current conditions at 25 °C under magnetic stirring for 160 min with *I* = 60 mA. After that the reaction mixture was diluted with H<sub>2</sub>O (30 ml) and washed with mixture of PE and ethyl acetate (1:1) (2×30 mL). Combined organic layer was washed with 0.3 M solution of Na<sub>2</sub>S<sub>2</sub>O<sub>3</sub> (2×10 mL), water (2×10 mL), dried over Na<sub>2</sub>SO<sub>4</sub> and concentrated under reduced pressure using a rotary evaporator (15-20 mmHg), (bath temperature, ca. 30–40 °C). Product **3a** was isolated by chromatography on SiO<sub>2</sub> (PE:EtOAc = from 15:1 to 2:1).

**Experimental Procedure for Table S1, entries 34, 35.**

An undivided cell was equipped with a glassy carbon anode (3 cm<sup>2</sup>) and a platinum plate cathode (3 cm<sup>2</sup>) and connected to a DC regulated power supply. The solution of (1-azidovinyl)benzene **1a** (1.0 mmol, 145.2 mg, 1.0 eq.), benzylamine **2a** (2.0 mmol, 214.3 mg, 2.0 eq.), *p*-TsOH·H<sub>2</sub>O (2.0 mmol, 380.0 mg, 2.0 eq.), and KI (1.0 mmol, 166.0 mg, 1.0 eq.) in 10 mL of DMF was electrolyzed using constant current conditions at 70 °C (entry 34) or 50 °C (entry 35) under magnetic stirring for 160 min with *I* = 60 mA. After that the reaction mixture was diluted with H<sub>2</sub>O (30 ml) and washed with mixture of PE and ethyl acetate (1:1) (2×30 mL). Combined organic layer was washed with 0.3 M solution of Na<sub>2</sub>S<sub>2</sub>O<sub>3</sub> (2×10 mL), water (2×10 mL), dried over Na<sub>2</sub>SO<sub>4</sub> and concentrated under reduced pressure using a rotary evaporator (15-20 mmHg), (bath temperature, ca. 30–40 °C). Product **3a** was isolated by chromatography on SiO<sub>2</sub> (PE:EtOAc = from 15:1 to 2:1).

**Experimental Procedure for Table S1, entries 36-42**

An undivided cell was equipped with a glassy carbon electrodes (3 cm<sup>2</sup> for each electrode, entry 36), or platinum electrodes (3 cm<sup>2</sup> for each electrode, entry 37), a graphite plate anode (3 cm<sup>2</sup>) and a platinum plate cathode (3 cm<sup>2</sup>) (entry 38); a glassy carbon anode (3 cm<sup>2</sup>) and a copper plate cathode (3 cm<sup>2</sup>) (entry 39); a glassy carbon anode (3 cm<sup>2</sup>) and stainless steel plate cathode (3 cm<sup>2</sup>) (entry 40); a glassy carbon anode (3 cm<sup>2</sup>) and nickel plate cathode (3 cm<sup>2</sup>) (entry 41); a platinum plate anode (3 cm<sup>2</sup>) and glassy carbon anode (3cm<sup>2</sup>) (entry 42) and connected to a DC regulated power supply. The solution of (1-azidovinyl)benzene **1a** (1.0 mmol, 145.2 mg, 1.0 eq.), benzylamine **2a** (2.0 mmol, 214.3 mg, 2.0 eq.), *p*-TsOH·H<sub>2</sub>O (2.0 mmol, 380.0 mg, 2.0 eq.), and KI (1.0 mmol, 166.0 mg, 1.0 eq.) in 10 mL of DMF was electrolyzed using constant current conditions at 70 °C under magnetic stirring for 160 min with *I* = 60 mA. After that the reaction mixture was diluted with H<sub>2</sub>O (30 ml) and washed with mixture of PE and ethyl acetate (1:1) (2×30 mL). Combined organic layer was washed with 0.3 M solution of Na<sub>2</sub>S<sub>2</sub>O<sub>3</sub> (2×10 mL), water (2×10 mL), dried over Na<sub>2</sub>SO<sub>4</sub> and concentrated under reduced pressure using a rotary evaporator (15-20 mmHg), (bath temperature, ca. 30–40 °C). Product **3a** was isolated by chromatography on SiO<sub>2</sub> (PE:EtOAc = from 15:1 to 2:1).



### General Experimental Procedure for Schemes 2, 3.

An undivided cell was equipped with a glassy carbon anode (3 cm<sup>2</sup>) and a platinum plate cathode (3 cm<sup>2</sup>) and connected to a DC regulated power supply. The solution of **1a** (1.0 mmol, 1.0 eq.), **2a** (2.0 mmol, 2.0 eq.), *p*-TsOH·H<sub>2</sub>O (2.0 mmol, 380.0 mg, 2.0 eq.), and KI (1.0 mmol, 166.0 mg, 1.0 eq.) in 10 mL of DMF was electrolyzed using constant current conditions at 70 °C under magnetic stirring for 160 min with *I* = 60 mA (*j* = 20 mA/cm<sup>2</sup>). After that the reaction mixture was diluted with H<sub>2</sub>O (30 ml) and washed with mixture of PE and ethyl acetate (1:1) (2×30 mL). Combined organic layer was washed with 0.3 M solution of Na<sub>2</sub>S<sub>2</sub>O<sub>3</sub> (2×10 mL), water (2×10 mL), dried over Na<sub>2</sub>SO<sub>4</sub> and concentrated under reduced pressure using a rotary evaporator (15-20 mmHg), (bath temperature, ca. 30–40 °C). Product **3** was isolated by chromatography on SiO<sub>2</sub>.

#### 1-benzyl-2,4-diphenyl-1*H*-imidazole (**3a**)<sup>[3]</sup>

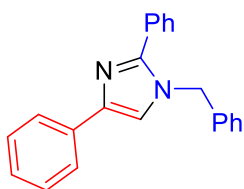

Yellow solid. Yield 61% (189.7 mg, 0.61 mmol, PE/EtOAc = from 15:1 to 2:1 as eluent), mp = 123-124 °C (lit.<sup>[3]</sup> mp = 123-124 °C). *R*<sub>f</sub> = 0.36 (PE:EtOAc = 5:1).

<sup>1</sup>H NMR (300.13 MHz, CDCl<sub>3</sub>, δ): 7.88 (d, *J* = 7.4 Hz, 2H), 7.68 – 7.58 (m, 2H), 7.51 – 7.43 (m, 3H), 7.43 – 7.35 (m, 5H), 7.33 – 7.27 (m, 2H), 7.23 – 7.13 (m, 2H), 5.26 (s, 2H).

<sup>13</sup>C{<sup>1</sup>H} NMR (75.48 MHz, CDCl<sub>3</sub>, δ): 148.7, 141.6, 136.9, 134.2, 130.5, 129.1, 128.7, 128.6, 128.0, 126.9, 126.7, 125.0, 116.9, 50.5.

HRMS (ESI-TOF) *m/z* [M+H]<sup>+</sup>. Calcd for [C<sub>22</sub>H<sub>19</sub>N<sub>2</sub>]<sup>+</sup>: 311.1543. Found: 311.1543.

IR (KBr): 3469, 3034, 1651, 1474, 1446, 1398, 772, 736, 697 cm<sup>-1</sup>.

#### 1-benzyl-2-phenyl-4-(*p*-tolyl)-1*H*-imidazole (**3b**)<sup>[3]</sup>

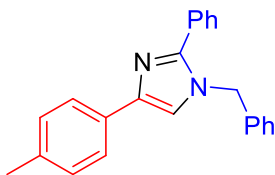

Yellow solid. Yield 52% (168.5 mg, 0.52 mmol, PE/EtOAc = from 15:1 to 2:1 as eluent), mp = 140-142 °C (lit.<sup>[3]</sup> mp = 138-140 °C). *R*<sub>f</sub> = 0.37 (PE:EtOAc = 5:1).

<sup>1</sup>H NMR (300.13 MHz, CDCl<sub>3</sub>, δ): 7.75 (d, *J* = 8.0 Hz, 2H), 7.68 – 7.58 (m, 2H), 7.47 – 7.38 (m, 3H), 7.37 – 7.28 (m, 3H), 7.24 – 7.10 (m, 5H), 5.21 (s, 2H), 2.36 (s, 3H)

<sup>13</sup>C{<sup>1</sup>H} NMR (75.48 MHz, CDCl<sub>3</sub>, δ): 148.5, 141.6, 137.0, 136.6, 131.2, 130.5, 129.3, 129.2, 129.1, 128.7, 128.1, 126.8, 125.0, 116.5, 50.6, 21.3.

HRMS (ESI-TOF) *m/z* [M+H]<sup>+</sup>. Calcd for [C<sub>23</sub>H<sub>21</sub>N<sub>2</sub>]<sup>+</sup>: 325.1699. Found: 325.1696.

IR (KBr): 3542, 3498, 3468, 3438, 3066, 3029, 2957, 2924, 2855, 1729, 1644, 1646, 1273, 1178, 822, 763, 731, 698 cm<sup>-1</sup>.

#### 1-benzyl-4-(4-(*tert*-butyl)phenyl)-2-phenyl-1*H*-imidazole (**3c**)<sup>[3]</sup>

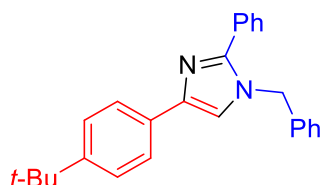

Yellow liquid. Yield 64% (234.6 mg, 0.64 mmol, PE/EtOAc = from 15:1 to 2:1 as eluent).  $R_f$  = 0.25 (PE:EtOAc = 5:1).

$^1\text{H}$  NMR (300.13 MHz,  $\text{CDCl}_3$ ,  $\delta$ ): 7.80 (d,  $J$  = 8.3 Hz, 2H), 7.68 – 7.58 (m, 2H), 7.46 – 7.37 (m, 5H), 7.37 – 7.29 (m, 3H), 7.23 (s, 1H), 7.13 (d,  $J$  = 6.6 Hz, 2H), 5.22 (s, 2H), 1.36 (s, 9H).

$^{13}\text{C}\{^1\text{H}\}$  NMR (75.48 MHz,  $\text{CDCl}_3$ ,  $\delta$ ): 149.9, 148.5, 141.7, 137.1, 131.3, 130.6, 129.2, 129.1, 129.0, 128.7, 128.0, 126.7, 125.5, 124.8, 116.6, 50.6, 34.6, 31.5.

HRMS (ESI-TOF)  $m/z$   $[\text{M}+\text{H}]^+$ . Calcd for  $[\text{C}_{26}\text{H}_{27}\text{N}_2]^+$ : 367.2169. Found: 367.2165.

IR (KBr): 3465, 3444, 3142, 3116, 3064, 3029, 2957, 2866, 1604, 1495, 1470, 1451, 1415, 1365, 1202, 836, 773, 730, 699, 522  $\text{cm}^{-1}$ .

### 1-benzyl-2-phenyl-4-(m-tolyl)-1H-imidazole (3d) <sup>[4]</sup>

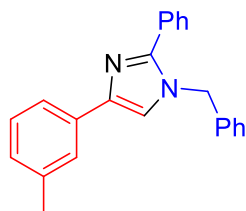

Yellow solid. Yield 44% (142.7 mg, 0.44 mmol, PE/EtOAc = from 15:1 to 2:1 as eluent), mp = 124-126 °C (lit.<sup>[4]</sup> mp = 125-126 °C).  $R_f$  = 0.23 (PE:EtOAc = 5:1).

$^1\text{H}$  NMR (300.13 MHz,  $\text{CDCl}_3$ ,  $\delta$ ): 7.78 (s, 1H), 7.69 – 7.59 (m, 3H), 7.47 – 7.38 (m, 3H), 7.39 – 7.27 (m, 4H), 7.24 (s, 1H), 7.17 – 7.07 (m, 3H), 5.18 (s, 2H), 2.41 (s, 3H).

$^{13}\text{C}\{^1\text{H}\}$  NMR (75.48 MHz,  $\text{CDCl}_3$ ,  $\delta$ ): 148.5, 141.5, 138.1, 136.9, 133.9, 130.4, 128.98, 128.95, 128.6, 128.4, 127.9, 127.6, 126.6, 125.6, 122.0, 116.9, 50.4, 21.5.

HRMS (ESI-TOF)  $m/z$   $[\text{M}+\text{H}]^+$ . Calcd for  $[\text{C}_{23}\text{H}_{21}\text{N}_2]^+$ : 325.1699. Found: 325.1695.

IR (KBr): 3471, 3134, 3030, 2952, 2918, 1604, 1449, 1402, 1359, 753, 696  $\text{cm}^{-1}$ .

### 1-benzyl-4-(4-methoxyphenyl)-2-phenyl-1H-imidazole (3e) <sup>[4]</sup>

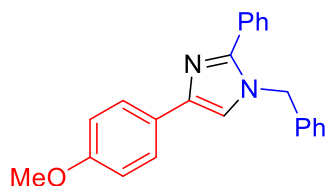

Yellow liquid. Yield 34% (115.6 mg, 0.34 mmol, PE/EtOAc = from 10:1 to 2:1 as eluent).  $R_f$  = 0.13 (PE:EtOAc = 5:1).

$^1\text{H}$  NMR (300.13 MHz,  $\text{CDCl}_3$ ,  $\delta$ ): 7.78 (d,  $J$  = 8.6 Hz, 2H), 7.67 – 7.57 (m, 2H), 7.47 – 7.39 (m, 3 H), 7.38 – 7.30 (m, 3H), 7.19 – 7.10 (m, 3H), 6.92 (d,  $J$  = 8.6 Hz, 2H), 5.21 (s, 2H), 3.82 (s, 3H).

$^{13}\text{C}\{^1\text{H}\}$  NMR (75.48 MHz,  $\text{CDCl}_3$ ,  $\delta$ ): 159.0, 148.4, 141.3, 136.9, 130.2, 129.21, 129.15, 128.8, 128.1, 126.8, 126.7, 126.4, 115.9, 114.1, 55.4, 50.7.

HRMS (ESI-TOF)  $m/z$   $[\text{M}+\text{H}]^+$ . Calcd for  $[\text{C}_{23}\text{H}_{21}\text{N}_2\text{O}]^+$ : 341.1648. Found: 341.1649.

IR (KBr): 3446, 3427, 3126, 3103, 3060, 3030, 2959, 2835, 1612, 1559, 1497, 1453, 1248, 1172, 1024, 833, 765, 698, 526  $\text{cm}^{-1}$ .

### 1-benzyl-4-(4-fluorophenyl)-2-phenyl-1H-imidazole (3f) <sup>[3]</sup>

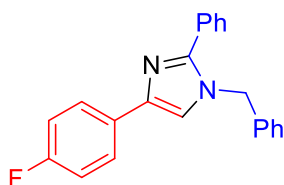

Yellow solid. Yield 53% (174.0 mg, 0.53 mmol, PE/EtOAc = from 10:1 to 2:1 as eluent), mp = 105-107 °C (lit.<sup>[3]</sup> mp = 106-107 °C).  $R_f$  = 0.67 (PE:EtOAc = 2:1).

$^1\text{H}$  NMR (300.13 MHz,  $\text{CDCl}_3$ ,  $\delta$ ): 7.87 – 7.75 (m, 2H), 7.66 – 7.57 (m, 2H), 7.46 – 7.39 (m, 3H), 7.38 – 7.31 (m, 3H), 7.19 (s, 1H), 7.17 – 7.10 (m, 2H), 7.09 – 7.00 (m, 2H), 5.20 (s, 2H).

$^{13}\text{C}\{^1\text{H}\}$  NMR (75.48 MHz,  $\text{CDCl}_3$ ,  $\delta$ ): 162.0 (d,  $J$  = 245.4 Hz), 148.7, 140.7, 136.8, 130.4 (d,  $J$  = 2.8 Hz), 129.12, 129.07, 129.0, 128.7, 128.1, 126.7, 126.60 (d,  $J$  = 7.9 Hz), 116.5, 115.4 (d,  $J$  = 21.5 Hz), 50.55.

HRMS (ESI-TOF)  $m/z$   $[\text{M}+\text{H}]^+$ . Calcd for  $[\text{C}_{22}\text{H}_{18}\text{FN}_2]^+$ : 329.1449. Found: 329.1443.

IR (KBr): 3458, 3059, 3032, 2357, 1644, 1495, 1348, 1218, 1156, 840, 761, 731, 695, 583, 519  $\text{cm}^{-1}$ .

### 1-benzyl-4-(4-bromophenyl)-2-phenyl-1H-imidazole (3g) <sup>[3]</sup>

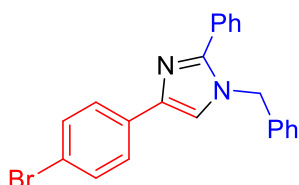

Yellow solid. Yield 56% (218.0 mg, 0.56 mmol, PE/EtOAc = from 10:1 to 2:1 as eluent), mp = 166-167 °C (lit.<sup>[3]</sup> mp = 164-166 °C).  $R_f$  = 0.71 (PE:EtOAc = 2:1).

$^1\text{H}$  NMR (300.13 MHz,  $\text{CDCl}_3$ ,  $\delta$ ): 7.72 (d,  $J$  = 8.4 Hz, 2H), 7.66 – 7.57 (m, 2H), 7.48 (d,  $J$  = 8.4 Hz, 2H), 7.46 – 7.40 (m, 3H), 7.39 – 7.30 (m, 3H), 7.22 (s, 1H), 7.17 – 7.08 (m, 2H), 5.19 (s, 2H).

$^{13}\text{C}\{^1\text{H}\}$  NMR (75.48 MHz,  $\text{CDCl}_3$ ,  $\delta$ ): 148.8, 140.4, 136.7, 133.1, 131.6, 130.2, 129.2, 129.1, 129.0, 128.7, 128.1, 126.8, 126.6, 120.5, 117.1, 50.6.

HRMS (ESI-TOF)  $m/z$   $[\text{M}+\text{H}]^+$ . Calcd for  $[\text{C}_{22}\text{H}_{18}\text{BrN}_2]^+$ : 389.0648, 391.0628. Found: 389.0645, 391.0628.

IR (KBr): 3472, 3129, 3059, 3025, 2977, 2952, 1599, 1550, 1478, 1413, 1188, 1070, 946, 830, 767, 701, 506  $\text{cm}^{-1}$ .

### 1-benzyl-4-(3-bromophenyl)-2-phenyl-1H-imidazole (3h)

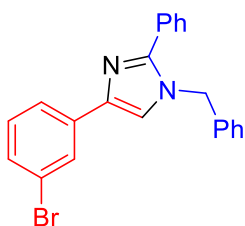

Yellow solid. Yield 42% (163.5 mg, 0.42 mmol, PE/EtOAc = from 10:1 to 2:1 as eluent), mp = 104-106 °C.  $R_f$  = 0.69 (PE:EtOAc = 2:1).

$^1\text{H}$  NMR (300.13 MHz,  $\text{CDCl}_3$ ,  $\delta$ ): 8.02 (s, 1H), 7.75 (d,  $J$  = 7.7 Hz, 1H), 7.66 – 7.56 (m, 2 H), 7.48 – 7.39 (m, 3H), 7.38 – 7.29 (m, 4H), 7.25 – 7.17 (m, 2H), 7.17 – 7.09 (m, 2H), 5.21 (s, 2H).

$^{13}\text{C}\{^1\text{H}\}$  NMR (75.48 MHz,  $\text{CDCl}_3$ ,  $\delta$ ): 148.9, 140.2, 136.7, 136.3, 130.3, 130.2, 129.7, 129.3, 129.2, 129.1, 128.8, 128.2, 128.0, 126.8, 123.5, 122.9, 117.5, 50.7.

HRMS (ESI-TOF)  $m/z$   $[\text{M}+\text{H}]^+$ . Calcd for  $[\text{C}_{22}\text{H}_{18}\text{BrN}_2]^+$ : 389.0648. Found: 389.0645.

IR (KBr): 3477, 3129, 3062, 3031, 2951, 1600, 1566, 1468, 1450, 1205, 1072, 956, 872, 735, 697, 461  $\text{cm}^{-1}$ .

### 1-benzyl-4-(2-chlorophenyl)-2-phenyl-1H-imidazole (3i) <sup>[3]</sup>

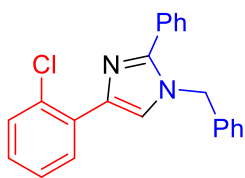

Yellow liquid. Yield 36% (124.2 mg, 0.36 mmol, PE/EtOAc = from 15:1 to 2:1 as eluent).  $R_f$  = 0.31 (PE:EtOAc = 5:1).

$^1\text{H}$  NMR (300.13 MHz,  $\text{CDCl}_3$ ,  $\delta$ ): 8.35 (dd,  $J$  = 7.9, 1.6 Hz, 1H), 7.77 (s, 1H), 7.67 – 7.58 (m, 2H), 7.46 – 7.39 (m, 4H), 7.38 – 7.30 (m, 4H), 7.22 – 7.10 (m, 3H), 5.26 (s, 2H).

$^{13}\text{C}\{^1\text{H}\}$  NMR (75.48 MHz,  $\text{CDCl}_3$ ,  $\delta$ ): 147.8, 137.6, 136.9, 132.5, 130.9, 130.4, 130.2, 129.8, 129.1, 129.1, 128.7, 128.0, 127.5, 126.9, 126.6, 121.7, 50.6.

HRMS (ESI-TOF)  $m/z$   $[\text{M}+\text{H}]^+$ . Calcd for  $[\text{C}_{22}\text{H}_{18}\text{ClN}_2]^+$ : 345.1153. Found: 345.1149.

IR (KBr): 3449, 3147, 3057, 3031, 1473, 1451, 1426, 1351, 1182, 1047, 764, 736, 700, 560  $\text{cm}^{-1}$ .

#### 4-(4-(azidomethyl)phenyl)-1-benzyl-2-phenyl-1H-imidazole (3j)

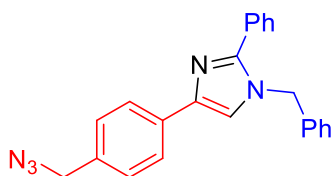

Yellow liquid. Yield 30% (109.6 mg, 0.30 mmol, PE/EtOAc = from 15:1 to 2:1 as eluent).  $R_f$  = 0.55 (PE:EtOAc = 2:1).

$^1\text{H}$  NMR (300.13 MHz,  $\text{CDCl}_3$ ,  $\delta$ ): 7.86 (d,  $J$  = 8.2 Hz, 2H), 7.66 – 7.56 (m, 2H), 7.48 – 7.39 (m, 3H), 7.38 – 7.28 (m, 5H), 7.26 (s, 1H), 7.18 – 7.08 (m, 2H), 5.20 (s, 2H), 4.32 (s, 2H).

$^{13}\text{C}\{^1\text{H}\}$  NMR (75.48 MHz,  $\text{CDCl}_3$ ,  $\delta$ ): 148.8, 141.0, 136.8, 134.2, 133.7, 130.4, 129.14, 129.07, 128.7, 128.6, 128.1, 126.8, 125.4, 117.2, 54.8, 50.6

HRMS (ESI-TOF)  $m/z$   $[\text{M}+\text{H}]^+$ . Calcd for  $[\text{C}_{23}\text{H}_{20}\text{N}_5]^+$ : 366.1713. Found: 366.1712.

IR (KBr): 3108, 3063, 3031, 2929, 2875, 2098, 1613, 1498, 1471, 1452, 1422, 1355, 1249, 1181, 1075, 1021, 948, 848, 771, 732, 699  $\text{cm}^{-1}$ .

#### 1-(4-methoxybenzyl)-2-(4-methoxyphenyl)-4-phenyl-1H-imidazole (3l) <sup>[3]</sup>

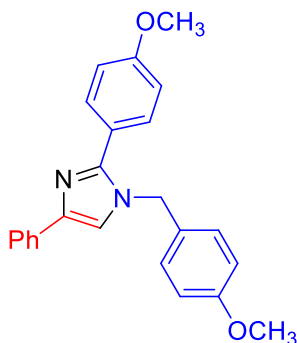

Yellow liquid. Yield 35% (129.7 mg, 0.35 mmol, PE/EtOAc = 5:1 as eluent).  $R_f$  = 0.38 (PE:EtOAc = 2:1).

$^1\text{H}$  NMR (300.13 MHz,  $\text{CDCl}_3$ ,  $\delta$ ): 7.80 (d,  $J$  = 7.3 Hz, 2H), 7.57 – 7.47 (m, 2H), 7.33 (t,  $J$  = 7.6 Hz, 2H), 7.24 – 7.14 (m, 2H), 7.04 (d,  $J$  = 8.6 Hz, 2H), 6.96 – 6.89 (m, 2H), 6.88 – 6.78 (m, 2H), 5.09 (s, 2H), 3.81 (s, 3H), 3.77 (s, 1H).

$^{13}\text{C}\{^1\text{H}\}$  NMR (75.48 MHz,  $\text{CDCl}_3$ ,  $\delta$ ): 160.3, 159.4, 148.5, 141.3, 134.3, 130.5, 129.0, 128.6, 128.2, 126.8, 125.0, 123.2, 116.5, 114.5, 114.1, 55.44, 55.42, 50.1.

HRMS (ESI-TOF)  $m/z$   $[\text{M}+\text{H}]^+$ . Calcd for  $[\text{C}_{24}\text{H}_{23}\text{N}_2\text{O}_2]^+$ : 371.1754. Found: 371.1751.

IR (KBr): 3130, 3060, 3033, 3002, 2957, 2935, 2834, 1611, 1514, 1485, 1457, 1295, 1253, 1177, 1029, 838, 735, 697, 611, 518  $\text{cm}^{-1}$ .

**1-(4-chlorobenzyl)-2-(4-chlorophenyl)-4-phenyl-1*H*-imidazole (3m)** <sup>[3]</sup>

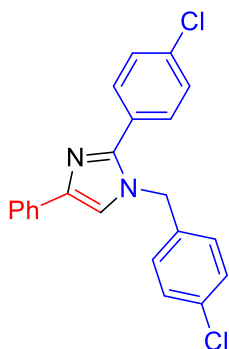

Yellow liquid. Yield 55% (208.6 mg, 0.55 mmol, PE/EtOAc = from 15:1 to 2:1 as eluent).  $R_f$  = 0.29 (PE:EtOAc = 5:1).

$^1\text{H}$  NMR (300.13 MHz,  $\text{CDCl}_3$ ,  $\delta$ ): 7.80 (d,  $J$  = 7.5 Hz, 2H), 7.54 – 7.44 (m, 2H), 7.42 – 7.35 (m, 4H), 7.34 – 7.27 (m, 2H), 7.26 – 7.18 (m, 2H), 7.01 (d,  $J$  = 8.3 Hz, 2H), 5.12 (s, 2H).

$^{13}\text{C}\{^1\text{H}\}$  NMR (75.48 MHz,  $\text{CDCl}_3$ ,  $\delta$ ): 147.4, 142.0, 135.3, 135.1, 134.1, 133.8, 130.2, 129.4, 129.0, 128.8, 128.7, 128.0, 127.2, 125.0, 117.1, 50.0.

HRMS (ESI-TOF)  $m/z$   $[\text{M}+\text{H}]^+$ . Calcd for  $[\text{C}_{22}\text{H}_{17}\text{Cl}_2\text{N}_2]^+$ : 379.0763. Found: 379.0760.

IR (KBr): 3130, 3062, 3032, 2931, 1896, 1606, 1489, 1450, 1411, 1180, 1092, 1014, 947, 910, 837, 732. 696, 488  $\text{cm}^{-1}$ .

**1-(2-chlorobenzyl)-2-(2-chlorophenyl)-4-phenyl-1*H*-imidazole (3n)** <sup>[4]</sup>

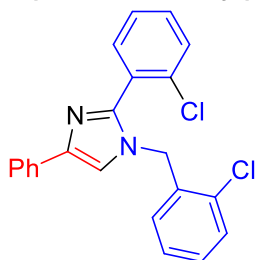

Yellow solid. Yield 40% (151.7 mg, 0.40 mmol, PE/EtOAc = from 15:1 to 2:1 as eluent), mp = 134-136 °C (lit.<sup>[4]</sup> mp = 135-136 °C).  $R_f$  = 0.22 (PE:EtOAc = 5:1).

$^1\text{H}$  NMR (300.13 MHz,  $\text{CDCl}_3$ ,  $\delta$ ): 7.81 (d,  $J$  = 7.4 Hz, 2H), 7.51 – 7.42 (m, 2H), 7.40 – 7.27 (m, 5H), 7.25 – 7.11 (m, 4H), 6.97 – 6.87 (m, 1H), 5.08 (s, 2H).

$^{13}\text{C}\{^1\text{H}\}$  NMR (75.48 MHz,  $\text{CDCl}_3$ ,  $\delta$ ): 145.9, 141.5, 134.7, 133.9, 133.8, 133.1, 132.8, 131.1, 129.9, 129.7, 129.5, 129.3, 128.6, 127.3, 127.0, 126.9, 124.9, 115.9, 48.2.

HRMS (ESI-TOF)  $m/z$   $[\text{M}+\text{H}]^+$ . Calcd for  $[\text{C}_{22}\text{H}_{17}\text{Cl}_2\text{N}_2]^+$ : 379.0763. Found: 379.0761.

IR (KBr): 3138, 3057, 2937, 2854, 1604, 1446, 1405, 1382, 1336, 1192, 1028, 948, 915, 753, 697, 506  $\text{cm}^{-1}$ .

**1-(4-fluorobenzyl)-2-(4-fluorophenyl)-4-phenyl-1*H*-imidazole (3o)** <sup>[4]</sup>

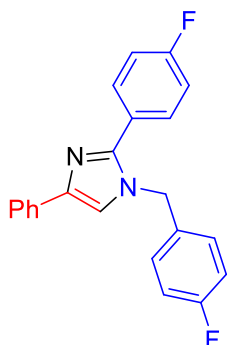

Yellow liquid. Yield 40% (138.6 mg, 0.40 mmol, PE/EtOAc = from 10:1 to 2:1 as eluent).  $R_f$  = 0.62 (PE:EtOAc = 2:1).

$^1\text{H}$  NMR (300.13 MHz,  $\text{CDCl}_3$ ,  $\delta$ ): 7.87 – 7.77 (m, 2H), 7.60 – 7.49 (m, 2H), 7.36 (t,  $J$  = 7.6 Hz, 2H), 7.28 – 7.22 (m, 1H), 7.21 (s, 1H), 7.16 – 7.09 (m, 1H), 7.09 – 6.97 (m, 5H), 5.12 (s, 2H).

$^{13}\text{C}\{^1\text{H}\}$  NMR (75.48 MHz,  $\text{CDCl}_3$ ,  $\delta$ ): 164.5 (d,  $J$  = 247.0 Hz), 161.24 (d,  $J$  = 245.2 Hz), 147.6, 141.7, 133.9, 132.4 (d,  $J$  = 3.3 Hz), 131.0 (d,  $J$  = 8.4 Hz), 128.7, 128.5 (d,  $J$  = 8.2 Hz), 127.1, 126.6 (d,  $J$  = 3.7 Hz), 125.0, 116.8, 116.1 (d,  $J$  = 19.4 Hz), 115.8 (d,  $J$  = 19.7 Hz), 49.9.

$^{19}\text{F}$  NMR (282 MHz,  $\text{CDCl}_3$ )  $\delta$  -112.31, -114.50.

HRMS (ESI-TOF)  $m/z$   $[\text{M}+\text{H}]^+$ : Calcd for  $[\text{C}_{22}\text{H}_{17}\text{F}_2\text{N}_2]^+$ : 347.1354. Found: 347.1354.

IR (KBr): 3129, 3065, 3038, 2932, 1607, 1511, 1485, 1451, 1419, 1226, 1159, 1097, 1015, 947, 910, 843, 733, 697, 607, 505  $\text{cm}^{-1}$ .

### 1-(3,4-dimethoxybenzyl)-2-(3,4-dimethoxyphenyl)-4-phenyl-1H-imidazole (3p) <sup>[3]</sup>

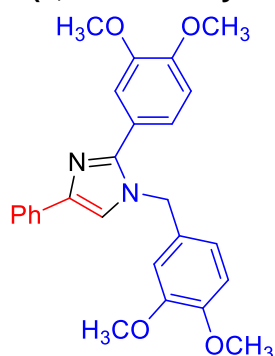

Yellow solid. Yield 38% (163.6 mg, 0.38 mmol, PE/EtOAc = 3:1 as eluent), mp = 181-183 °C (lit.<sup>[3]</sup> mp = 182-184 °C).  $R_f$  = 0.15 (PE:EtOAc = 2:1).

$^1\text{H}$  NMR (300.13 MHz,  $\text{CDCl}_3$ ,  $\delta$ ): 7.84 (d,  $J$  = 7.4 Hz, 2H), 7.36 (t,  $J$  = 7.4 Hz, 2H), 7.28 – 7.17 (m, 3H), 7.13 (d,  $J$  = 8.6 Hz, 1H), 6.94 – 6.79 (m, 2H), 6.74 – 6.66 (m, 1H), 6.63 (s, 1H), 5.16 (s, 2H), 3.90 (s, 3H), 3.87 (s, 3H), 3.82 (s, 3H), 3.80 (s, 3H).

$^{13}\text{C}\{^1\text{H}\}$  NMR (75.48 MHz,  $\text{CDCl}_3$ ,  $\delta$ ): 149.9, 149.5, 149.1, 148.9, 148.4, 141.1, 133.9, 129.4, 128.6, 126.9, 125.0, 123.0, 121.6, 119.1, 116.7, 112.5, 111.6, 111.1, 109.9, 56.0, 55.9, 50.4

HRMS (ESI-TOF)  $m/z$   $[\text{M}+\text{H}]^+$ . Calcd for  $[\text{C}_{26}\text{H}_{27}\text{N}_2\text{O}_4]^+$ : 431.1965. Found: 431.1969.

IR (KBr): 3453, 3130, 3099, 3012, 2959, 2936, 2835, 1606, 1515, 1442, 1320, 1261, 1244, 1141, 1025, 812, 765, 723, 696  $\text{cm}^{-1}$ .

### 2-(furan-2-yl)-1-(furan-2-ylmethyl)-4-phenyl-1H-imidazole (3q) <sup>[3]</sup>

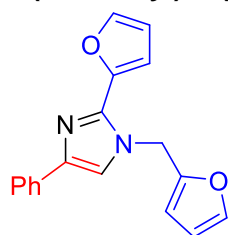

Yellow liquid. Yield 38% (110.3 mg, 0.38 mmol, PE/EtOAc = from 10:1 to 2:1 as eluent).  $R_f$  = 0.55 (PE:EtOAc = 2:1).

$^1\text{H}$  NMR (300.13 MHz,  $\text{CDCl}_3$ ,  $\delta$ ): 7.81 (d,  $J$  = 7.4 Hz, 2H), 7.58 – 7.51 (m, 1H), 7.40 – 7.30 (m, 3H), 7.25 – 7.20 (m, 2H), 6.96 (d,  $J$  = 3.4 Hz, 1H), 6.58 – 6.49 (m, 1H), 6.36 – 6.31 (m, 1H), 6.31 – 6.26 (m, 1H), 5.36 (s, 2H).

$^{13}\text{C}\{^1\text{H}\}$  NMR (75.48 MHz,  $\text{CDCl}_3$ ,  $\delta$ ): 149.3, 145.4, 143.1, 142.9, 141.7, 139.1, 133.7, 128.6, 127.0, 125.1, 116.7, 111.7, 110.7, 110.4, 109.1, 44.0.

HRMS (ESI-TOF)  $m/z$   $[\text{M}+\text{H}]^+$ . Calcd for  $[\text{C}_{18}\text{H}_{15}\text{N}_2\text{O}_2]^+$ : 291.1128. Found: 291.1125.

IR (KBr): 3124, 3061, 3032, 2928, 2853, 1678, 1606, 1482, 1446, 1343, 1222, 1185, 1149, 1073, 1011, 948, 909, 885, 816, 736, 696, 596, 504  $\text{cm}^{-1}$ .

**3-(4-phenyl-1-(pyridin-3-ylmethyl)-1H-imidazol-2-yl)pyridine (3r)**

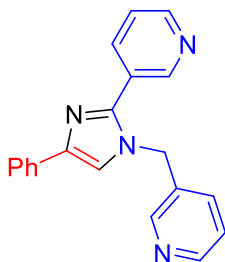

Yellow liquid. Yield 30% (93.7 mg, 0.30 mmol, PE/EtOAc = 1:1 as eluent).  $R_f$  = 0.10 (PE:EtOAc = 1:1).  $^1\text{H}$  NMR (300.13 MHz,  $\text{CDCl}_3$ ,  $\delta$ ): 8.80 (s, 1H), 8.61 (d,  $J$  = 4.7, 1H), 8.52 (d,  $J$  = 4.7, 1H), 8.40 (s, 1H), 7.88 (d,  $J$  = 7.8 Hz, 1H), 7.78 (d,  $J$  = 7.9 Hz, 2H), 7.40 – 7.29 (m, 4H), 7.29 – 7.19 (m, 3H), 5.20 (s, 2H).  $^{13}\text{C}\{^1\text{H}\}$  NMR (75.48 MHz,  $\text{CDCl}_3$ ,  $\delta$ ): 150.1, 149.7, 149.3, 148.2, 145.4, 142.6, 136.4, 134.3, 133.4, 131.9, 128.7, 127.3, 126.5, 125.0, 124.0, 123.6, 117.3, 48.4.

HRMS (ESI-TOF)  $m/z$   $[\text{M}+\text{H}]^+$ . Calcd for  $[\text{C}_{20}\text{H}_{17}\text{N}_4]^+$ : 313.1448. Found: 313.1440.

IR (KBr): 3386, 3127, 3059, 3035, 2934, 2219, 1606, 1575, 1481, 1450, 1426, 1193, 1090, 1027, 912, 816, 731, 644, 507  $\text{cm}^{-1}$ .

### CV study

Cyclic voltammetry (CV) was implemented on an IPC-Pro M computer-assisted potentiostat manufactured by «Econix» (scan rate error 1.0%). The starting potential was set to 0.25 mV, and the initial sweep was carried out in the positive (anode) region at a rate of 100 mV/s. Analyzed solutions were prepared in acetonitrile and contained  $n\text{-Bu}_4\text{NBF}_4$  (0.1 M) as an supporting electrolyte and analyte (0.05 M). The experiments were performed in a 10 mL fiveneck glass conic electrochemical cell with a water jacket for thermostating. CV curves were recorded using a three-electrode scheme. In a typical case, 10 mL of a solution was utilized. The working electrode was a disc glassy-carbon electrode ( $d=3$  mm, surface area  $\sim 0.07$  cm<sup>2</sup>). A platinum wire served as an auxiliary electrode. An Ag/AgNO<sub>3</sub> electrode was used as the reference electrode and was linked to the solution by a porous glass diaphragm. The solutions were kept under thermally controlled conditions at  $15 \pm 0.5$  °C and deaerated by bubbling argon. Electrochemical experiments were performed under an argon atmosphere. The working electrode was polished with figure-eight motions on a synthetic chamois leather pad using a Cr<sub>2</sub>O<sub>3</sub>-based polishing paste ( $\sim 5$   $\mu\text{m}$  particle size) down to the mirror-like surface, and rinsed with acetonitrile. Polishing was carried before each recording of CV curve.

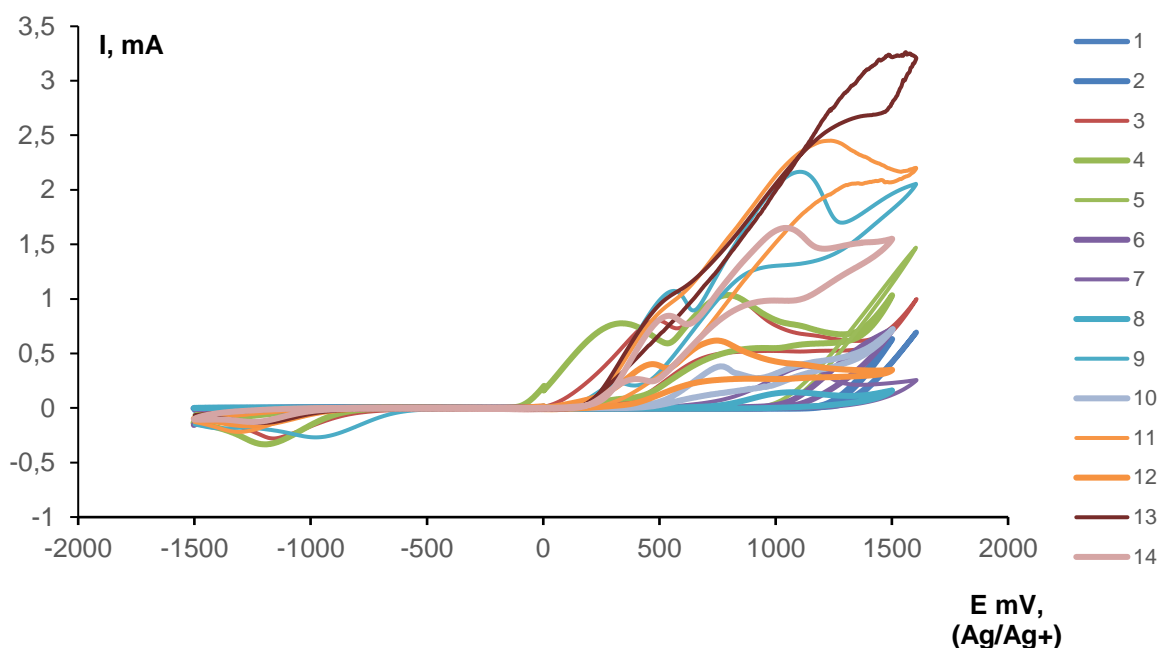

**Figure S1.** CV curves for the corresponding solutions on a working glassy-carbon electrode ( $d=3$  mm) under a scan rate of 0.1 V/s. 1) 0.1 M  $n\text{-Bu}_4\text{NBF}_4$  solution in DMF; 2) 0.2 M solution of  $p\text{-TsOH}\cdot\text{H}_2\text{O}$  in 0.1 M  $n\text{-Bu}_4\text{NBF}_4$  solution in DMF; 3) 0.1 M solution of KI in 0.1 M  $n\text{-Bu}_4\text{NBF}_4$  solution in DMF; 4) 0.1 M solution of KI in 0.2 M solution of  $p\text{-TsOH}\cdot\text{H}_2\text{O}$  in 0.1 M  $n\text{-Bu}_4\text{NBF}_4$  solution in DMF; 5) 0.1 M solution of vinyl azide **1a** in 0.1 M  $n\text{-Bu}_4\text{NBF}_4$  solution in DMF; 6) mixture of vinyl azide **1a** and  $p\text{-TsOH}\cdot\text{H}_2\text{O}$  in 0.1 M  $n\text{-Bu}_4\text{NBF}_4$  solution in DMF; 7) 0.2 M solution of amine **2a** in 0.1 M  $n\text{-Bu}_4\text{NBF}_4$  solution in DMF; 8) mixture of amine **2a** and  $p\text{-TsOH}\cdot\text{H}_2\text{O}$  in 0.1 M  $n\text{-Bu}_4\text{NBF}_4$  solution in DMF; 9) 0.1 M solution of vinyl azide **1a** in 0.1 M solution of KI in 0.1 M  $n\text{-Bu}_4\text{NBF}_4$  solution in DMF; 10) mixture of vinyl azide **1a** and  $p\text{-TsOH}\cdot\text{H}_2\text{O}$  in 0.1 M solution of KI in 0.1 M  $n\text{-Bu}_4\text{NBF}_4$  solution in DMF; 11) 0.2 M solution of amine **2a** in 0.1 M  $n\text{-Bu}_4\text{NBF}_4$  solution in DMF; 12) mixture of amine **2a** and  $p\text{-TsOH}\cdot\text{H}_2\text{O}$  in 0.1 M solution of KI in 0.1 M  $n\text{-Bu}_4\text{NBF}_4$  solution in DMF; 13) mixture of vinyl azide **1a** and amine **2a** in 0.1 M solution of KI in 0.1 M  $n\text{-Bu}_4\text{NBF}_4$  solution in DMF; 14) mixture of vinyl azide **1a**, amine **2a** and  $p\text{-TsOH}\cdot\text{H}_2\text{O}$  in 0.1 M solution of KI in 0.1 M  $n\text{-Bu}_4\text{NBF}_4$  solution in DMF.



## Experimental Procedures for Scheme 4

### a)

The solution of (1-azidovinyl)benzene **1a** (1.0 mmol, 145.2 mg, 1.0 eq.), benzylamine **2a** (2.0 mmol, 214.3 mg, 2.0 eq.), *p*-TsOH·H<sub>2</sub>O (2.0 mmol, 380.0 mg, 2.0 eq.), and I<sub>2</sub> (4.0 mmol, 1.0 g, 4.0 eq.) in 10 mL of DMF was stirred at 70 °C for 160 min. After that the reaction mixture was diluted with H<sub>2</sub>O (30 mL) and washed with mixture of PE and ethyl acetate (1:1) (2×30 mL). Combined organic layer was washed with 0.3 M solution of Na<sub>2</sub>S<sub>2</sub>O<sub>3</sub> (2×10 mL), water (2×10 mL), dried over Na<sub>2</sub>SO<sub>4</sub> and concentrated under reduced pressure using a rotary evaporator (15–20 mmHg), (bath temperature, ca. 30–40 °C). Product **3a** was not detected. Product **5** was isolated by chromatography on SiO<sub>2</sub> (PE:EtOAc = from 15:1 to 2:1) The isolated yield is 20% (24.3 mg, 0.20 mmol).

### b)

An undivided cell was equipped with a glassy carbon anode (3 cm<sup>2</sup>) and a platinum plate cathode (3 cm<sup>2</sup>) and connected to a DC regulated power supply. The solution of ω-iodoacetophenone **4** (1.0 mmol, 246.1 mg, 1.0 eq.), benzylamine **2a** (2.0 mmol, 214.3 mg, 2.0 eq.), *p*-TsOH·H<sub>2</sub>O (2.0 mmol, 380.0 mg, 2.0 eq.), and KI (1.0 mmol, 170.0 mg, 1.0 eq.) in 10 mL of DMF was electrolyzed using constant current conditions at 70 °C under magnetic stirring for 160 min with *I* = 60 mA (*j* = 20 mA/cm<sup>2</sup>). After that the reaction mixture was diluted with H<sub>2</sub>O (30 mL) and washed with mixture of PE and ethyl acetate (1:1) (2×30 mL). Combined organic layer was washed with 0.3 M solution of Na<sub>2</sub>S<sub>2</sub>O<sub>3</sub> (2×10 mL), water (2×10 mL), dried over Na<sub>2</sub>SO<sub>4</sub> and concentrated under reduced pressure using a rotary evaporator (15–20 mmHg), (bath temperature, ca. 30–40 °C). Product **3a** was not detected. Product **5** was isolated by chromatography on SiO<sub>2</sub> (PE:EtOAc = from 15:1 to 2:1) The isolated yield is 13% (15.6 mg, 0.20 mmol).

### c)

An undivided cell was equipped with a glassy carbon anode (3 cm<sup>2</sup>) and a platinum plate cathode (3 cm<sup>2</sup>) and connected to a DC regulated power supply. The solution of acetophenone **5** (1.0 mmol, 120.2 mg, 1.0 eq.), benzylamine **2a** (2.0 mmol, 214.3 mg, 2.0 eq.), *p*-TsOH·H<sub>2</sub>O (2.0 mmol, 380.0 mg, 2.0 eq.), and KI (1.0 mmol, 170.0 mg, 1.0 eq.) in 10 mL of DMF was electrolyzed using constant current conditions at 70 °C under magnetic stirring for 160 min with *I* = 60 mA (*j* = 20 mA/cm<sup>2</sup>). After that the reaction mixture was diluted with H<sub>2</sub>O (30 mL) and washed with mixture of PE and ethyl acetate (1:1) (2×30 mL). Combined organic layer was washed with 0.3 M solution of Na<sub>2</sub>S<sub>2</sub>O<sub>3</sub> (2×10 mL), water (2×10 mL), dried over Na<sub>2</sub>SO<sub>4</sub> and concentrated under reduced pressure using a rotary evaporator (15–20 mmHg), (bath temperature, ca. 30–40 °C). Product **3a** was isolated by chromatography on SiO<sub>2</sub> (PE:EtOAc = from 15:1 to 2:1).

### d)

An undivided cell was equipped with a glassy carbon anode (3 cm<sup>2</sup>) and a platinum plate cathode (3 cm<sup>2</sup>) and connected to a DC regulated power supply. The solution of 3-phenyl-2*H*-azirine **6** (1.0 mmol, 117.2 mg, 1.0 eq.), benzylamine **2a** (2.0 mmol, 214.3 mg, 2.0 eq.), *p*-TsOH·H<sub>2</sub>O (2.0 mmol, 380.0 mg, 2.0 eq.), and KI (1.0 mmol, 170.0 mg, 1.0 eq.) in 10 mL of DMF was electrolyzed using constant current conditions at 70 °C under magnetic stirring for 160 min with *I* = 60 mA (*j* = 20 mA/cm<sup>2</sup>). After that the reaction mixture was diluted with H<sub>2</sub>O (30 mL) and washed with mixture of PE and ethyl acetate (1:1) (2×30 mL). Combined organic layer was washed with 0.3 M solution of Na<sub>2</sub>S<sub>2</sub>O<sub>3</sub> (2×10 mL), water (2×10 mL), dried over Na<sub>2</sub>SO<sub>4</sub> and concentrated under reduced pressure using a rotary evaporator (15–20 mmHg), (bath temperature, ca. 30–40 °C). Product **3a** was isolated by chromatography on SiO<sub>2</sub> (PE:EtOAc = from 15:1 to 2:1).

## Experimental Procedures for Scheme 5.

### a)

A divided cell was equipped with a glassy carbon anode (3 cm<sup>2</sup>) and a platinum plate cathode (3 cm<sup>2</sup>) and connected to a DC regulated power supply. Anodic space: the solution of (1-azidovinyl)benzene **1a**

(1.0 mmol, 145.2 mg, 1.0 eq.), benzylamine **2a** (2.0 mmol, 214.3 mg, 2.0 eq.), KI (1.0 mmol, 166.0 mg, 1.0 eq.) and supporting electrolyte *n*-Bu<sub>4</sub>NBF<sub>4</sub> (0.5 mmol, 164.6 mg) in 10 mL of DMF. Cathodic space: KI (1.0 mmol, 166.0 mg, 1.0 eq) and supporting electrolyte *n*-Bu<sub>4</sub>NBF<sub>4</sub> (0.5 mmol, 164.6 mg) in 10 mL of DMF. The solutions were electrolyzed using constant current conditions at 25 °C under magnetic stirring for 320 min with *I* = 20 mA. After that the reaction mixture was diluted with H<sub>2</sub>O (30 ml) and washed with mixture of PE and ethyl acetate (1:1) (2×30 mL). Combined organic layer was washed with 0.3 M solution of Na<sub>2</sub>S<sub>2</sub>O<sub>3</sub> (2×10 mL), water (2×10 mL), dried over Na<sub>2</sub>SO<sub>4</sub> and concentrated under reduced pressure using a rotary evaporator (15-20 mmHg), (bath temperature, ca. 30–40 °C). Product **3a** was isolated by chromatography on SiO<sub>2</sub> (PE:EtOAc = from 15:1 to 2:1).

**b)**

A divided cell was equipped with a glassy carbon anode (3 cm<sup>2</sup>) and a platinum plate cathode (3 cm<sup>2</sup>) and connected to a DC regulated power supply. Anodic space: the solution of (1-azidovinyl)benzene **1a** (1.0 mmol, 145.2 mg, 1.0 eq.), benzylamine **2a** (2.0 mmol, 214.3 mg, 2.0 eq.), *p*-TsOH·H<sub>2</sub>O (2.0 mmol, 380.0 mg, 2.0 eq.), KI (1.0 mmol, 166.0 mg, 1.0 eq.), and supporting electrolyte *n*-Bu<sub>4</sub>NBF<sub>4</sub> (0.5 mmol, 164.6 mg) in 10 mL of DMF. Cathodic space: KI (1.0 mmol, 166.0 mg, 1.0 eq) and supporting electrolyte *n*-Bu<sub>4</sub>NBF<sub>4</sub> (0.5 mmol, 164.6 mg) in 10 mL of DMF. The solutions were electrolyzed using constant current conditions at 25 °C under magnetic stirring for 320 min with *I* = 20 mA. After that the reaction mixture was diluted with H<sub>2</sub>O (30 ml) and washed with mixture of PE and ethyl acetate (1:1) (2×30 mL). Combined organic layer was washed with 0.3 M solution of Na<sub>2</sub>S<sub>2</sub>O<sub>3</sub> (2×10 mL), water (2×10 mL), dried over Na<sub>2</sub>SO<sub>4</sub> and concentrated under reduced pressure using a rotary evaporator (15-20 mmHg), (bath temperature, ca. 30–40 °C). Product **3a** was isolated by chromatography on SiO<sub>2</sub> (PE:EtOAc = from 15:1 to 2:1).

**c)**

An undivided cell was equipped with a glassy carbon anode (3 cm<sup>2</sup>) and a platinum plate cathode (3 cm<sup>2</sup>) and connected to a DC regulated power supply. The solution of (1-Azidovinyl)benzene **1a** (1.0 mmol, 145.2 mg, 1.0 eq.), benzylamine **2a** (2.0 mmol, 214.3 mg, 2.0 eq.), and KI (1.0 mmol, 166.0 mg, 1.0 eq.) in 10 mL of DMF was electrolyzed using constant current conditions at 25 °C under magnetic stirring for 320 min with *I* = 20 mA. After that the reaction mixture was diluted with H<sub>2</sub>O (30 ml) and washed with mixture of PE and ethyl acetate (1:1) (2×30 mL). Combined organic layer was washed with 0.3 M solution of Na<sub>2</sub>S<sub>2</sub>O<sub>3</sub> (2×10 mL), water (2×10 mL), dried over Na<sub>2</sub>SO<sub>4</sub> and concentrated under reduced pressure using a rotary evaporator (15-20 mmHg), (bath temperature, ca. 30–40 °C). Product **3a** was isolated by chromatography on SiO<sub>2</sub> (PE:EtOAc = from 15:1 to 2:1).

**d)**

An undivided cell was equipped with a glassy carbon anode (3 cm<sup>2</sup>) and a platinum plate cathode (3 cm<sup>2</sup>) and connected to a DC regulated power supply. The solution of (1-azidovinyl)benzene **1a** (1.0 mmol, 145.2 mg, 1.0 eq.), benzylamine **2a** (2.0 mmol, 214.3 mg, 2.0 eq.), *p*-TsOH·H<sub>2</sub>O (2.0 mmol, 380.0 mg, 2.0 eq.), and KI (1.0 mmol, 166.0 mg, 1.0 eq.) in 10 mL of DMF was electrolyzed using constant current conditions at 25 °C under magnetic stirring for 320 min with *I* = 20 mA. After that the reaction mixture was diluted with H<sub>2</sub>O (30 ml) and washed with mixture of PE and ethyl acetate (1:1) (2×30 mL). Combined organic layer was washed with 0.3 M solution of Na<sub>2</sub>S<sub>2</sub>O<sub>3</sub> (2×10 mL), water (2×10 mL), dried over Na<sub>2</sub>SO<sub>4</sub> and concentrated under reduced pressure using a rotary evaporator (15-20 mmHg), (bath temperature, ca. 30–40 °C). Product **3a** was isolated by chromatography on SiO<sub>2</sub> (PE:EtOAc = from 15:1 to 2:1).

## References

1. R. Dey, P. Banerjee, *Org. Lett.* **2017**, 19, 304-307.
2. M. Andresini, L. Degannaro, R. Luisi Beilstein *J. Org. Chem.* **2021**, 17, 203–209.
3. L. Xiang, Y. Niu, X. Pang, X. Yang, R. Yan. *Chem. Commun.* **2015**, 51, 6598-6600.
4. Z. Yang, J. Zhang, L. Hu, A. Li, L. Li, K. Liu, T. Yang, C. Zhou. *J. Org. Chem.* **2020**, 85, 5952–5958.

# NMR spectra of synthesized compounds

## <sup>1</sup>H NMR of 3a

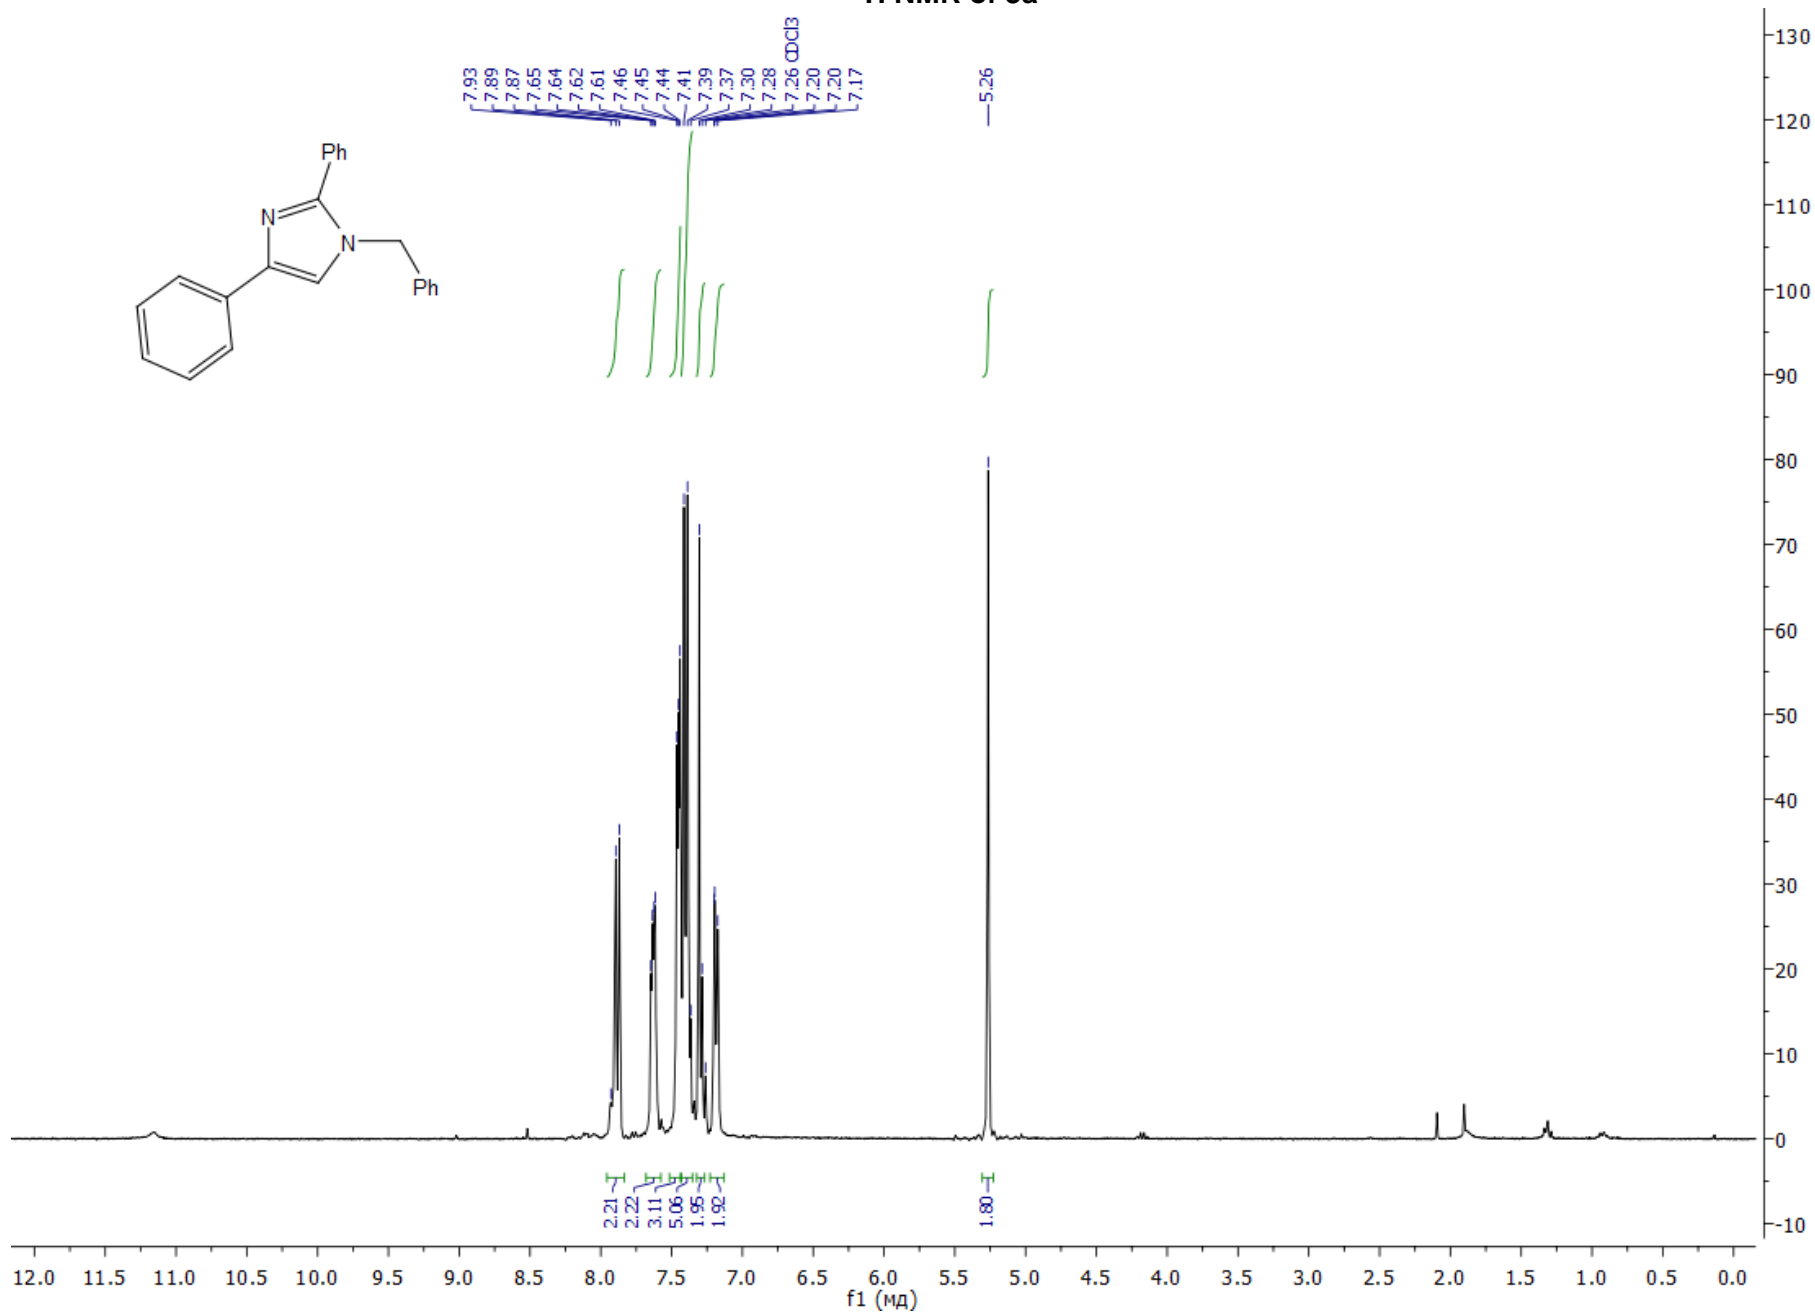

<sup>13</sup>C NMR of 3a

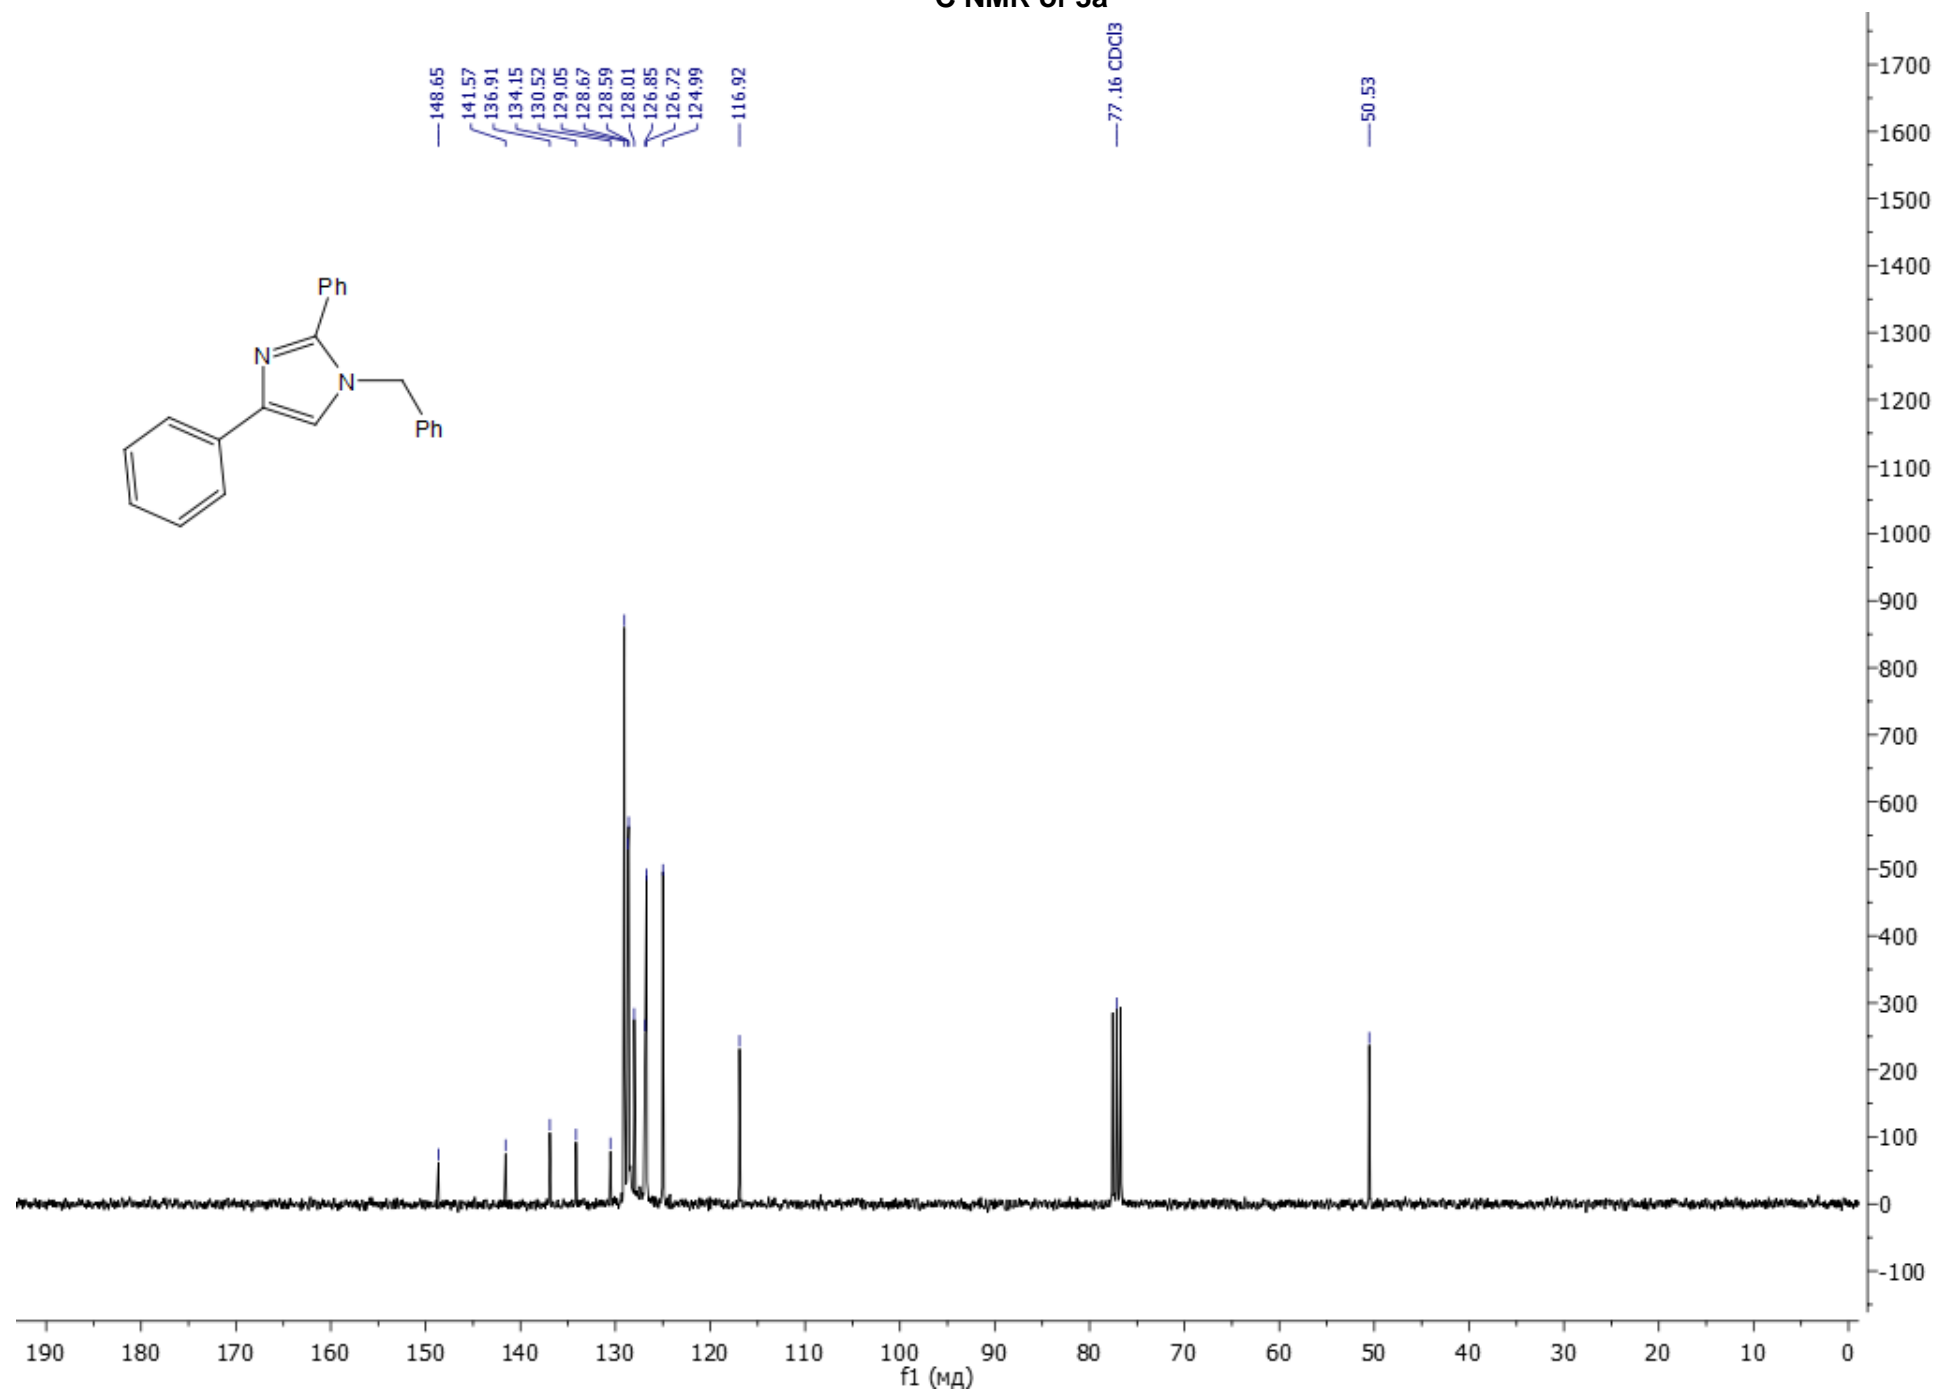

<sup>1</sup>H NMR of 3b

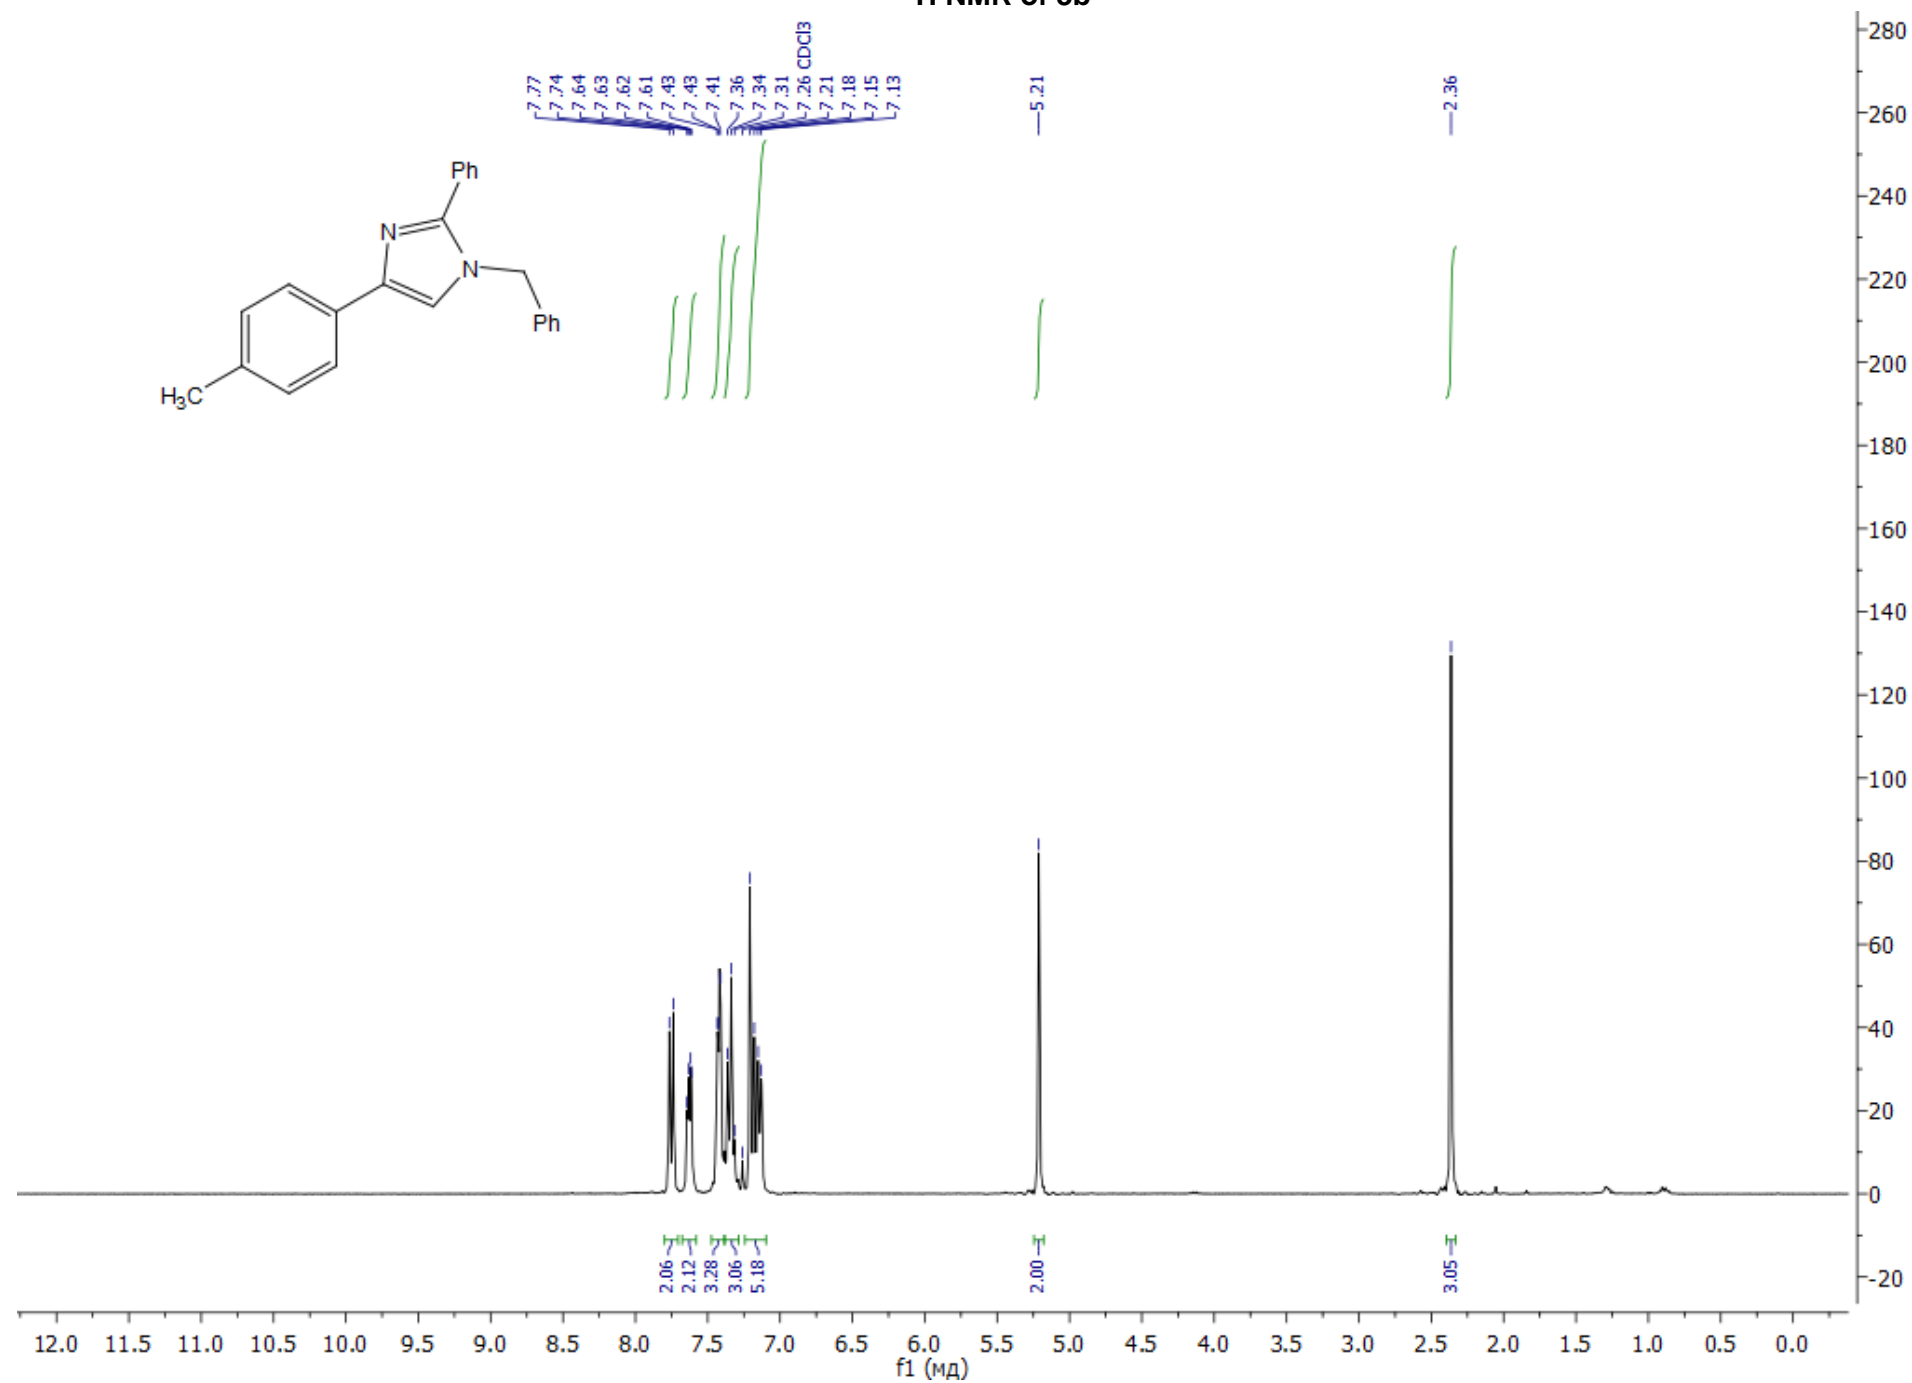

**$^{13}\text{C}$  NMR of 3b**

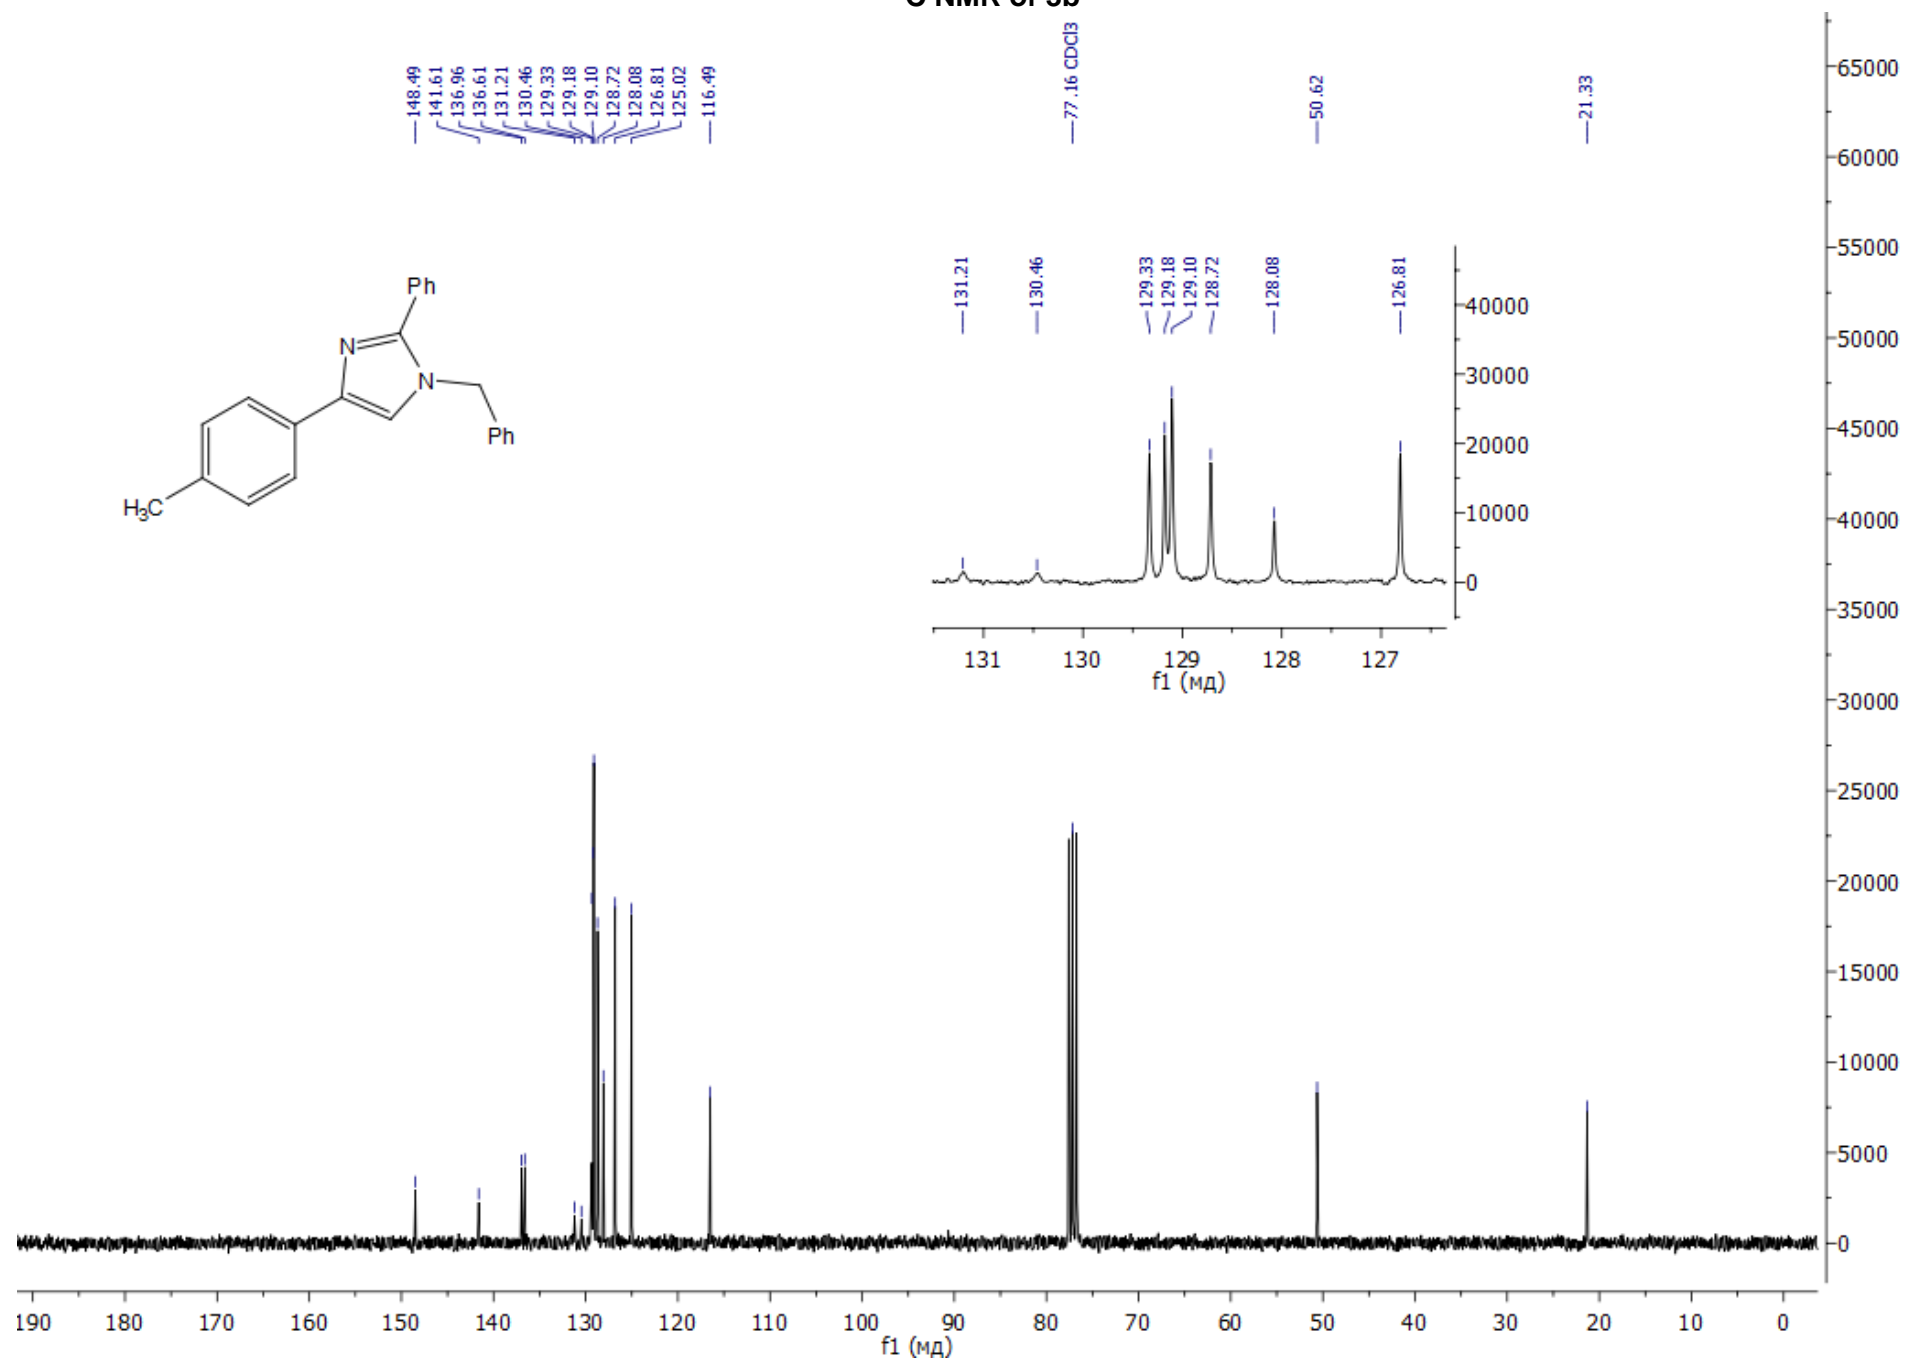

<sup>1</sup>H NMR of 3c

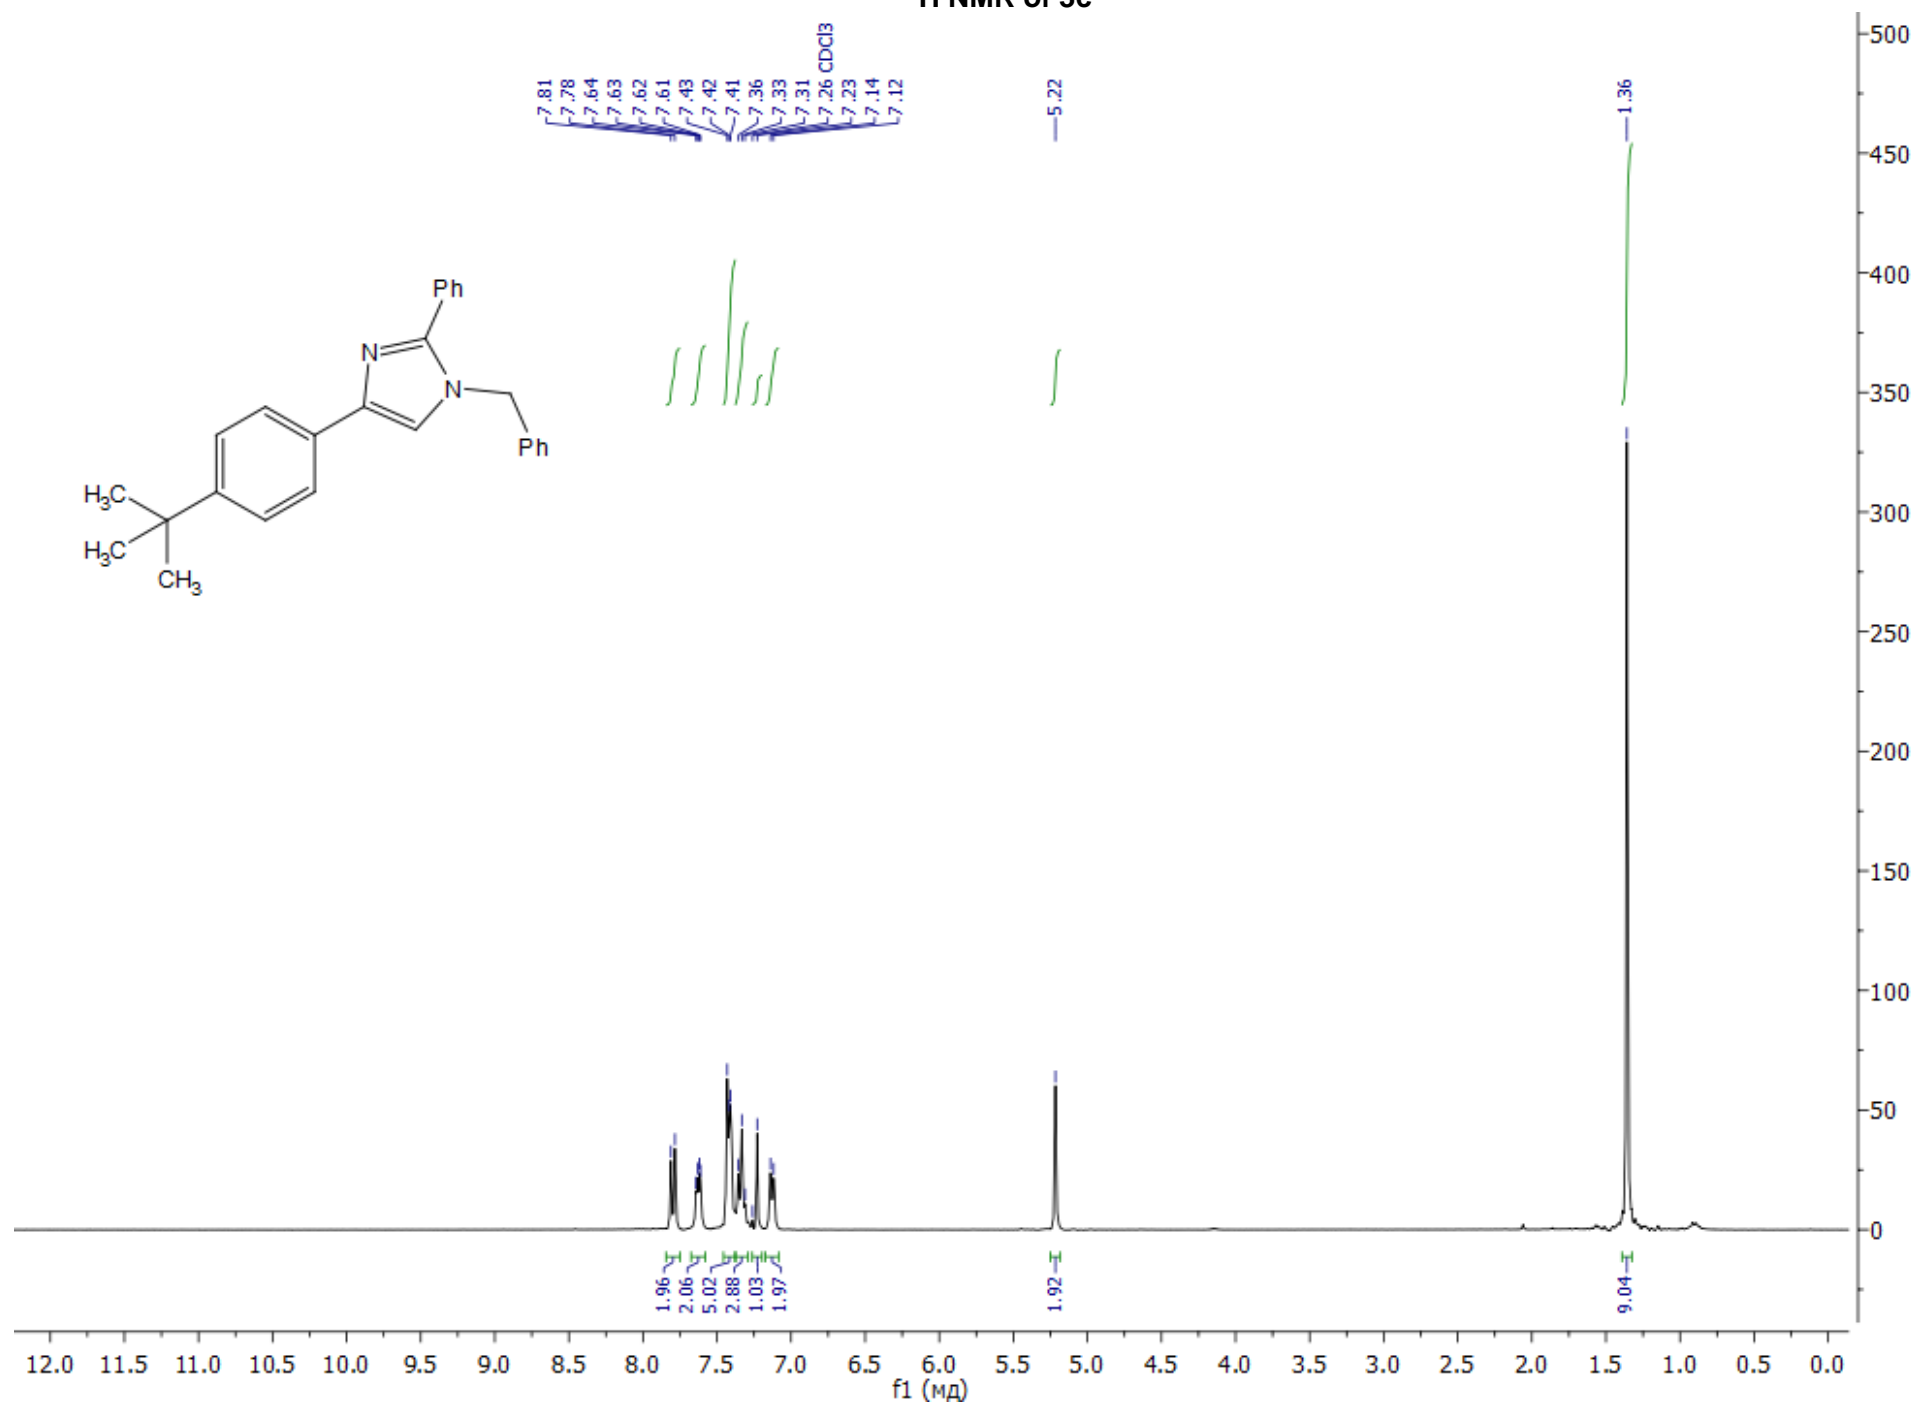

<sup>13</sup>C NMR of 3c

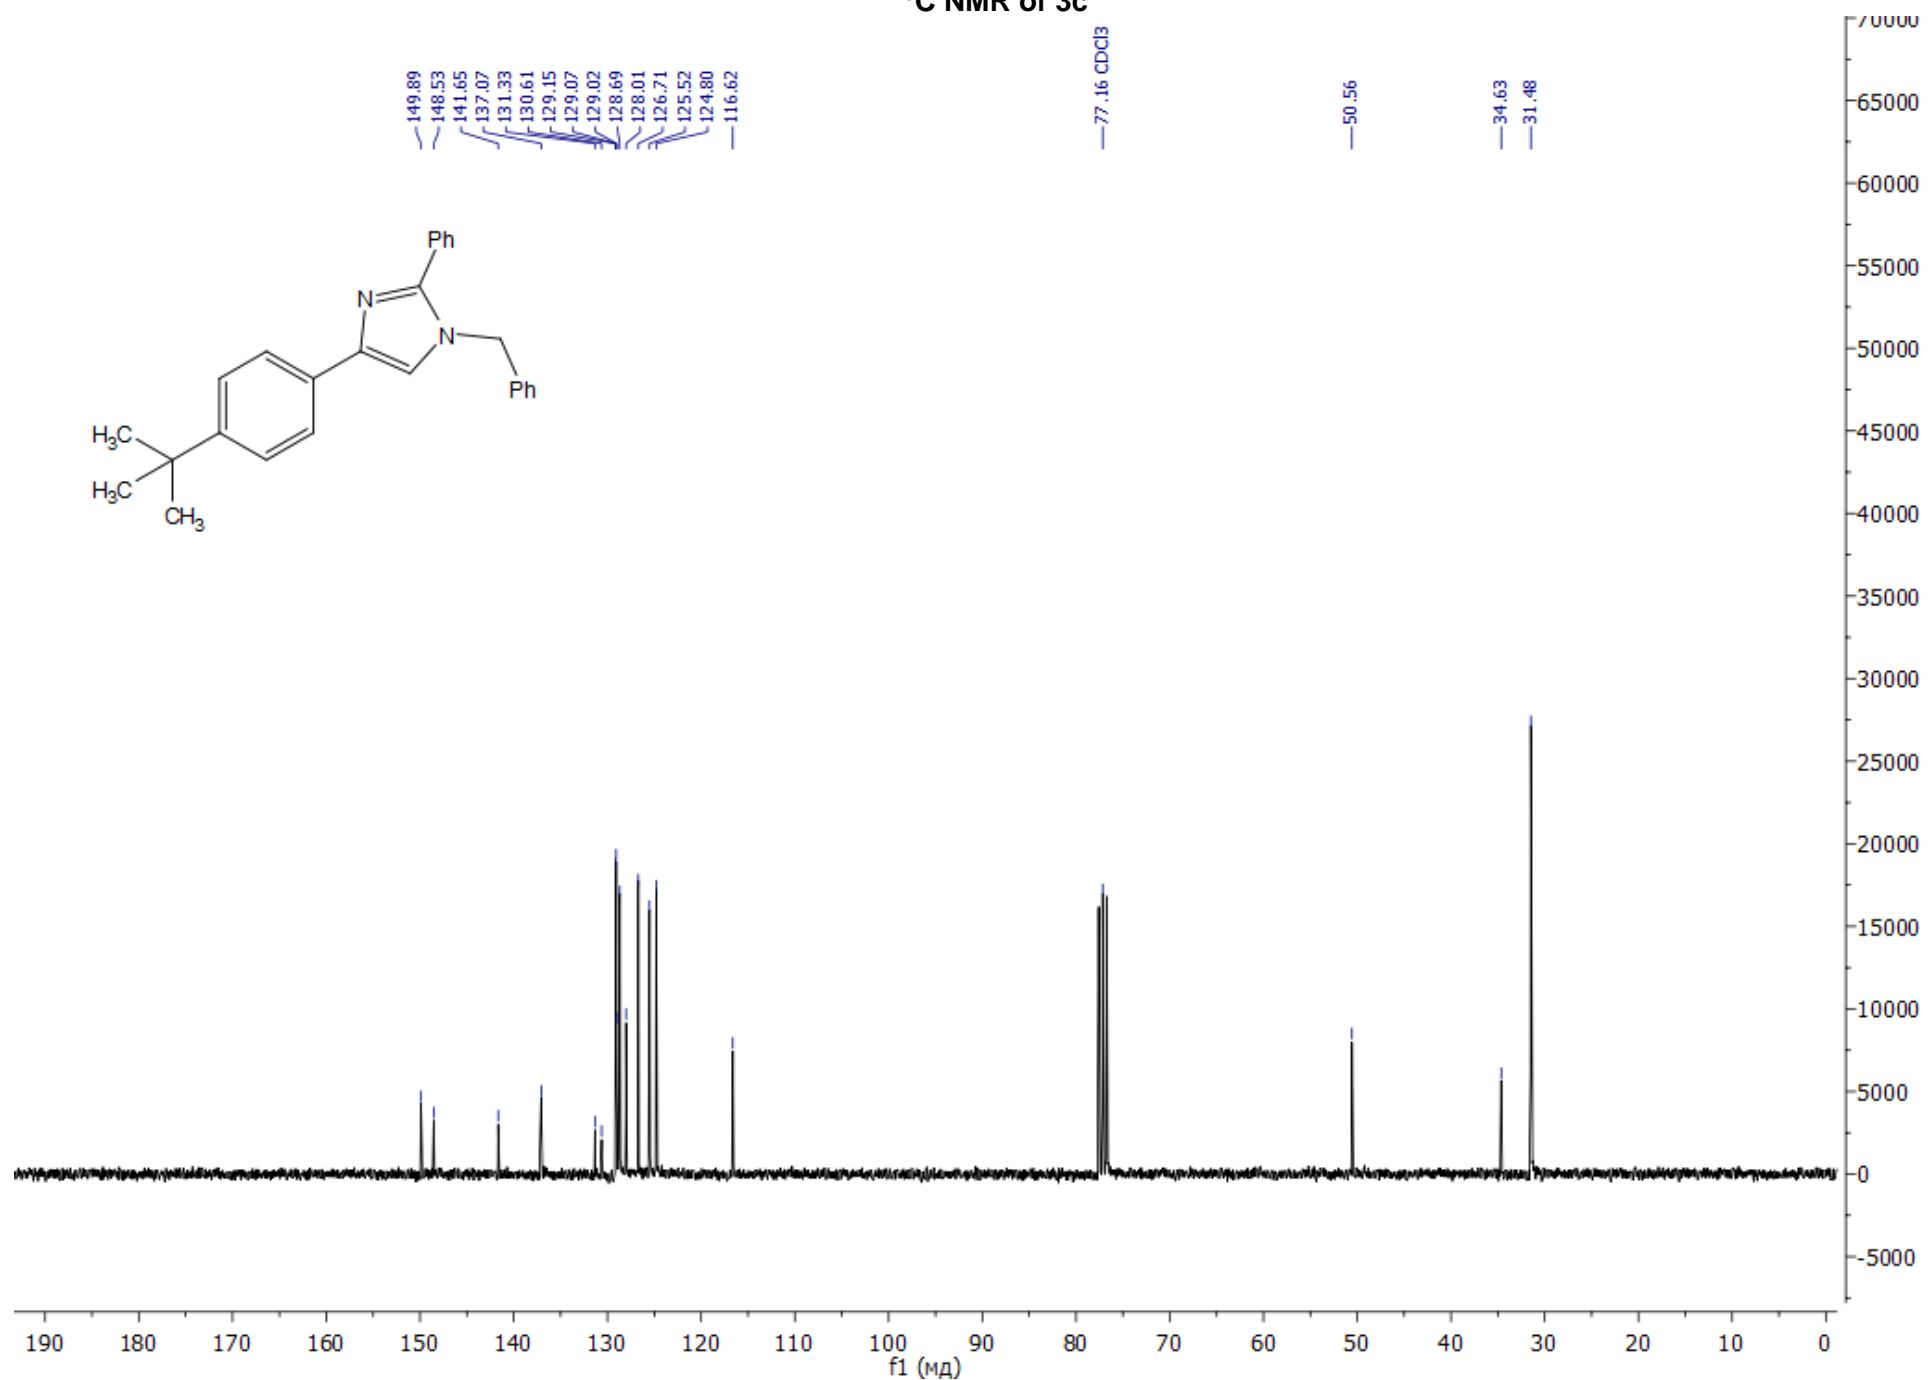



<sup>1</sup>H NMR of 3d

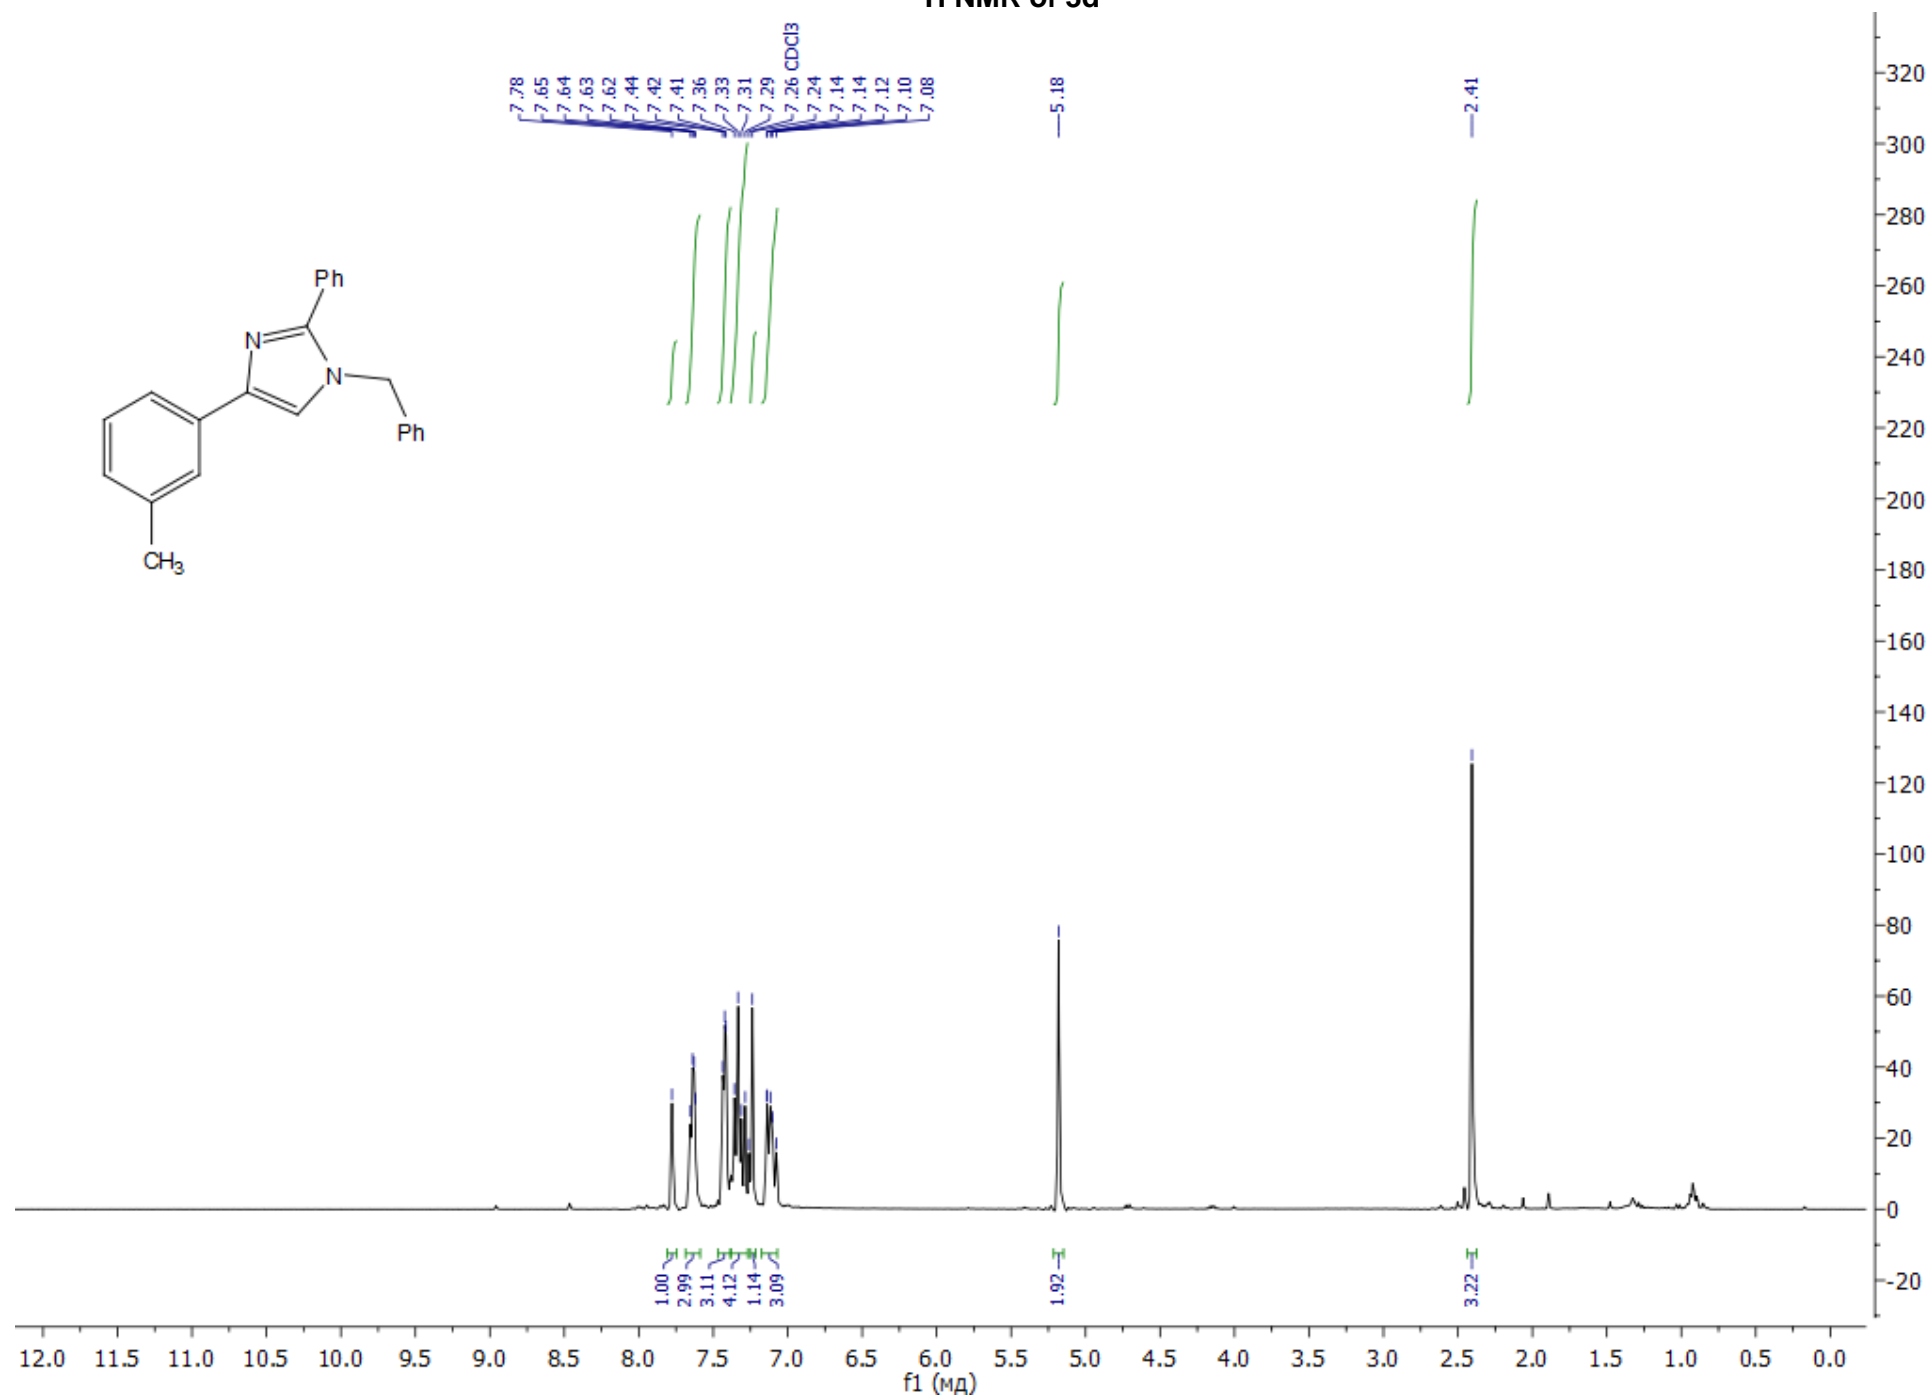

<sup>13</sup>C NMR of 3d

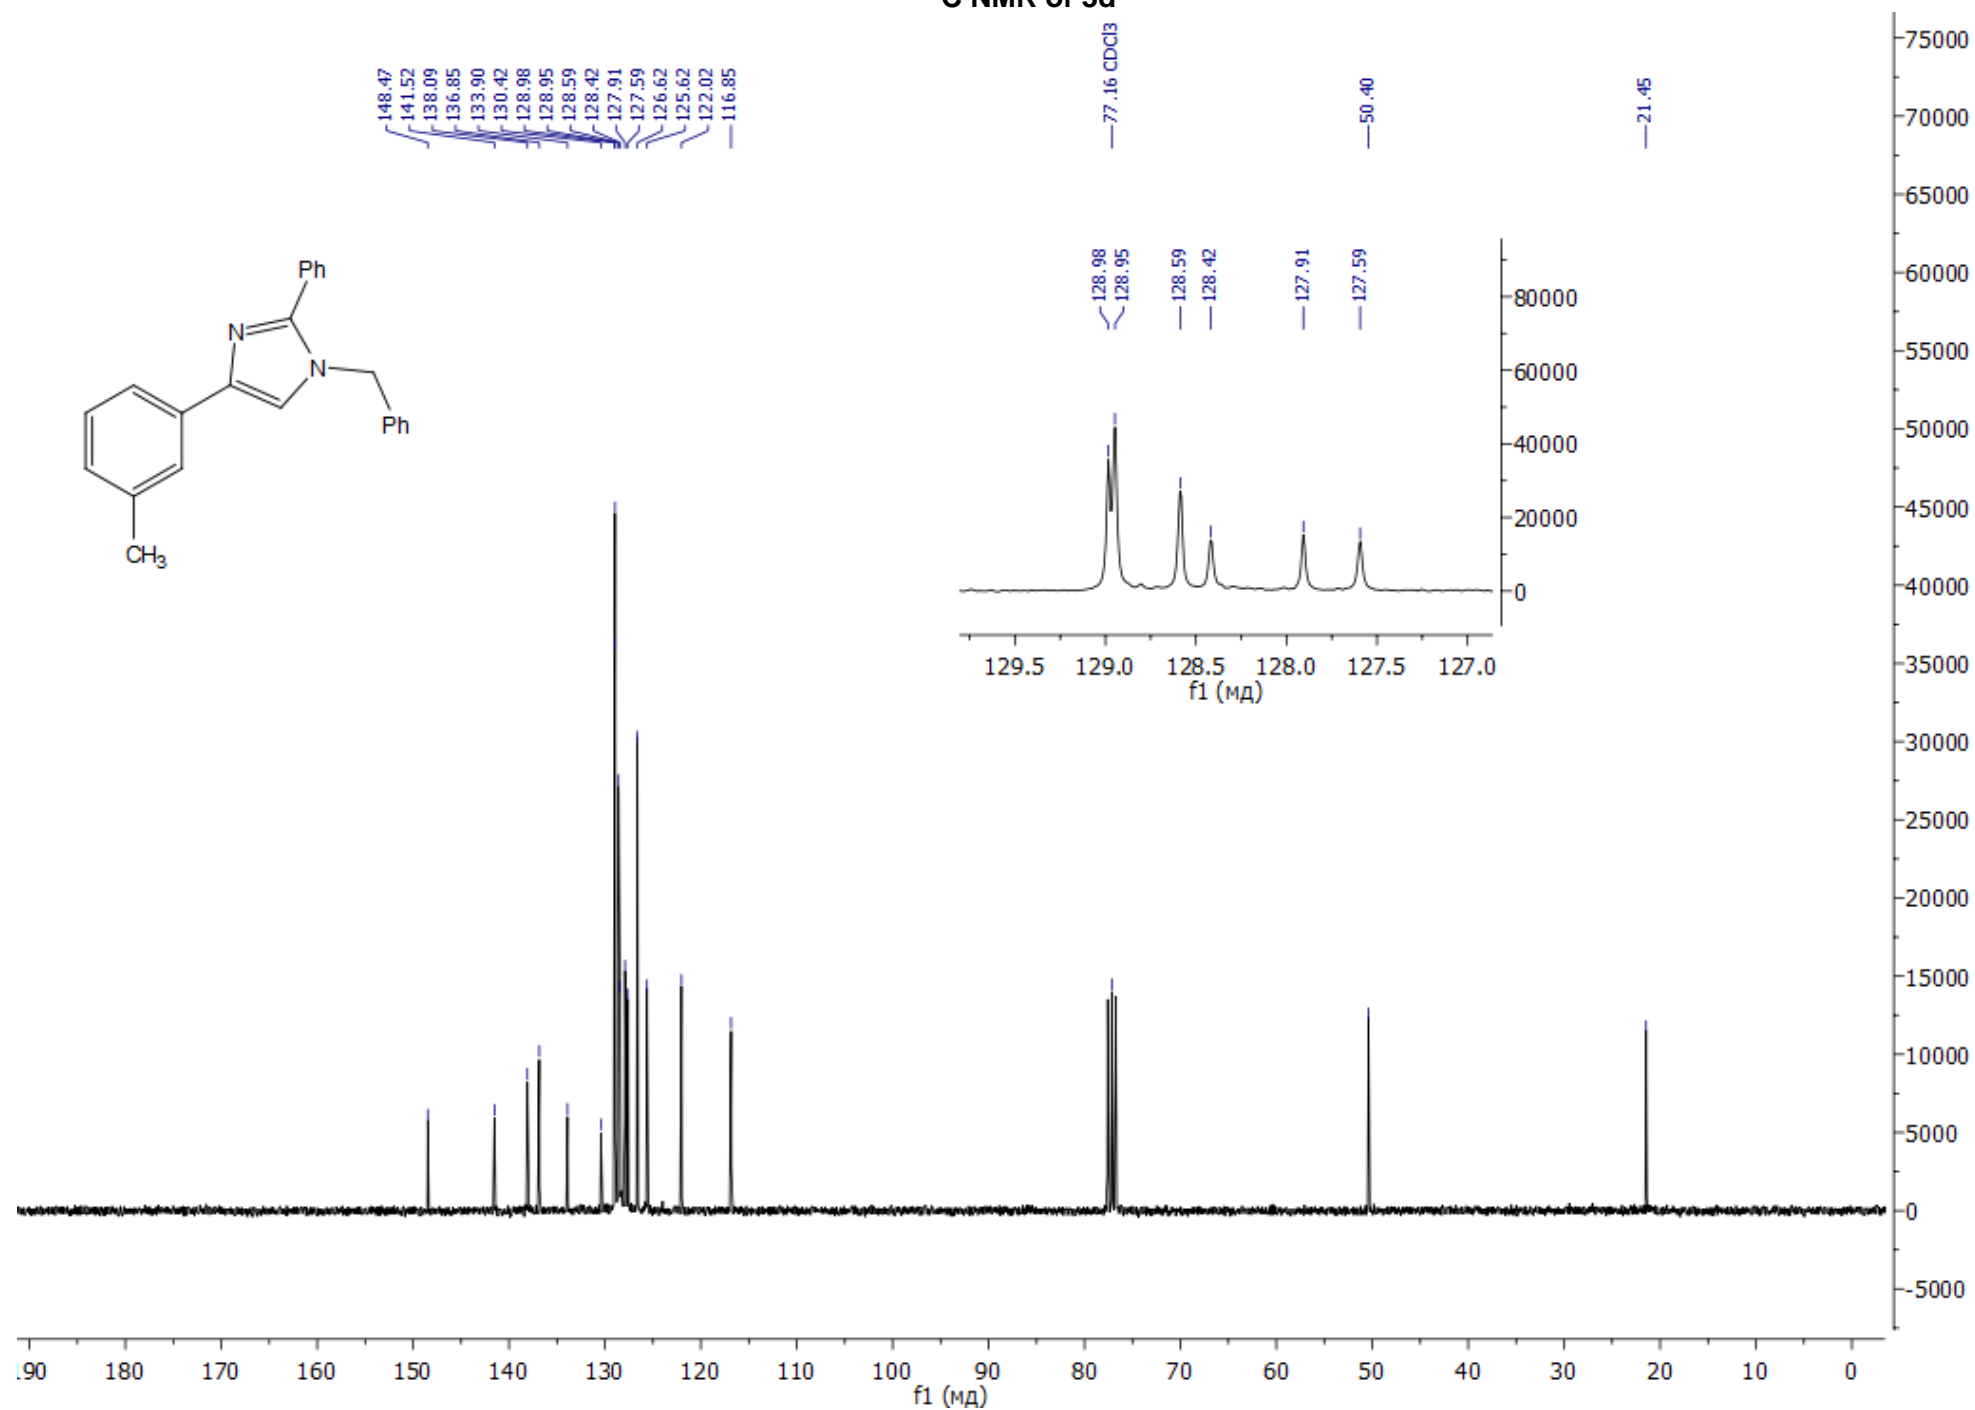

<sup>1</sup>H NMR of 3e

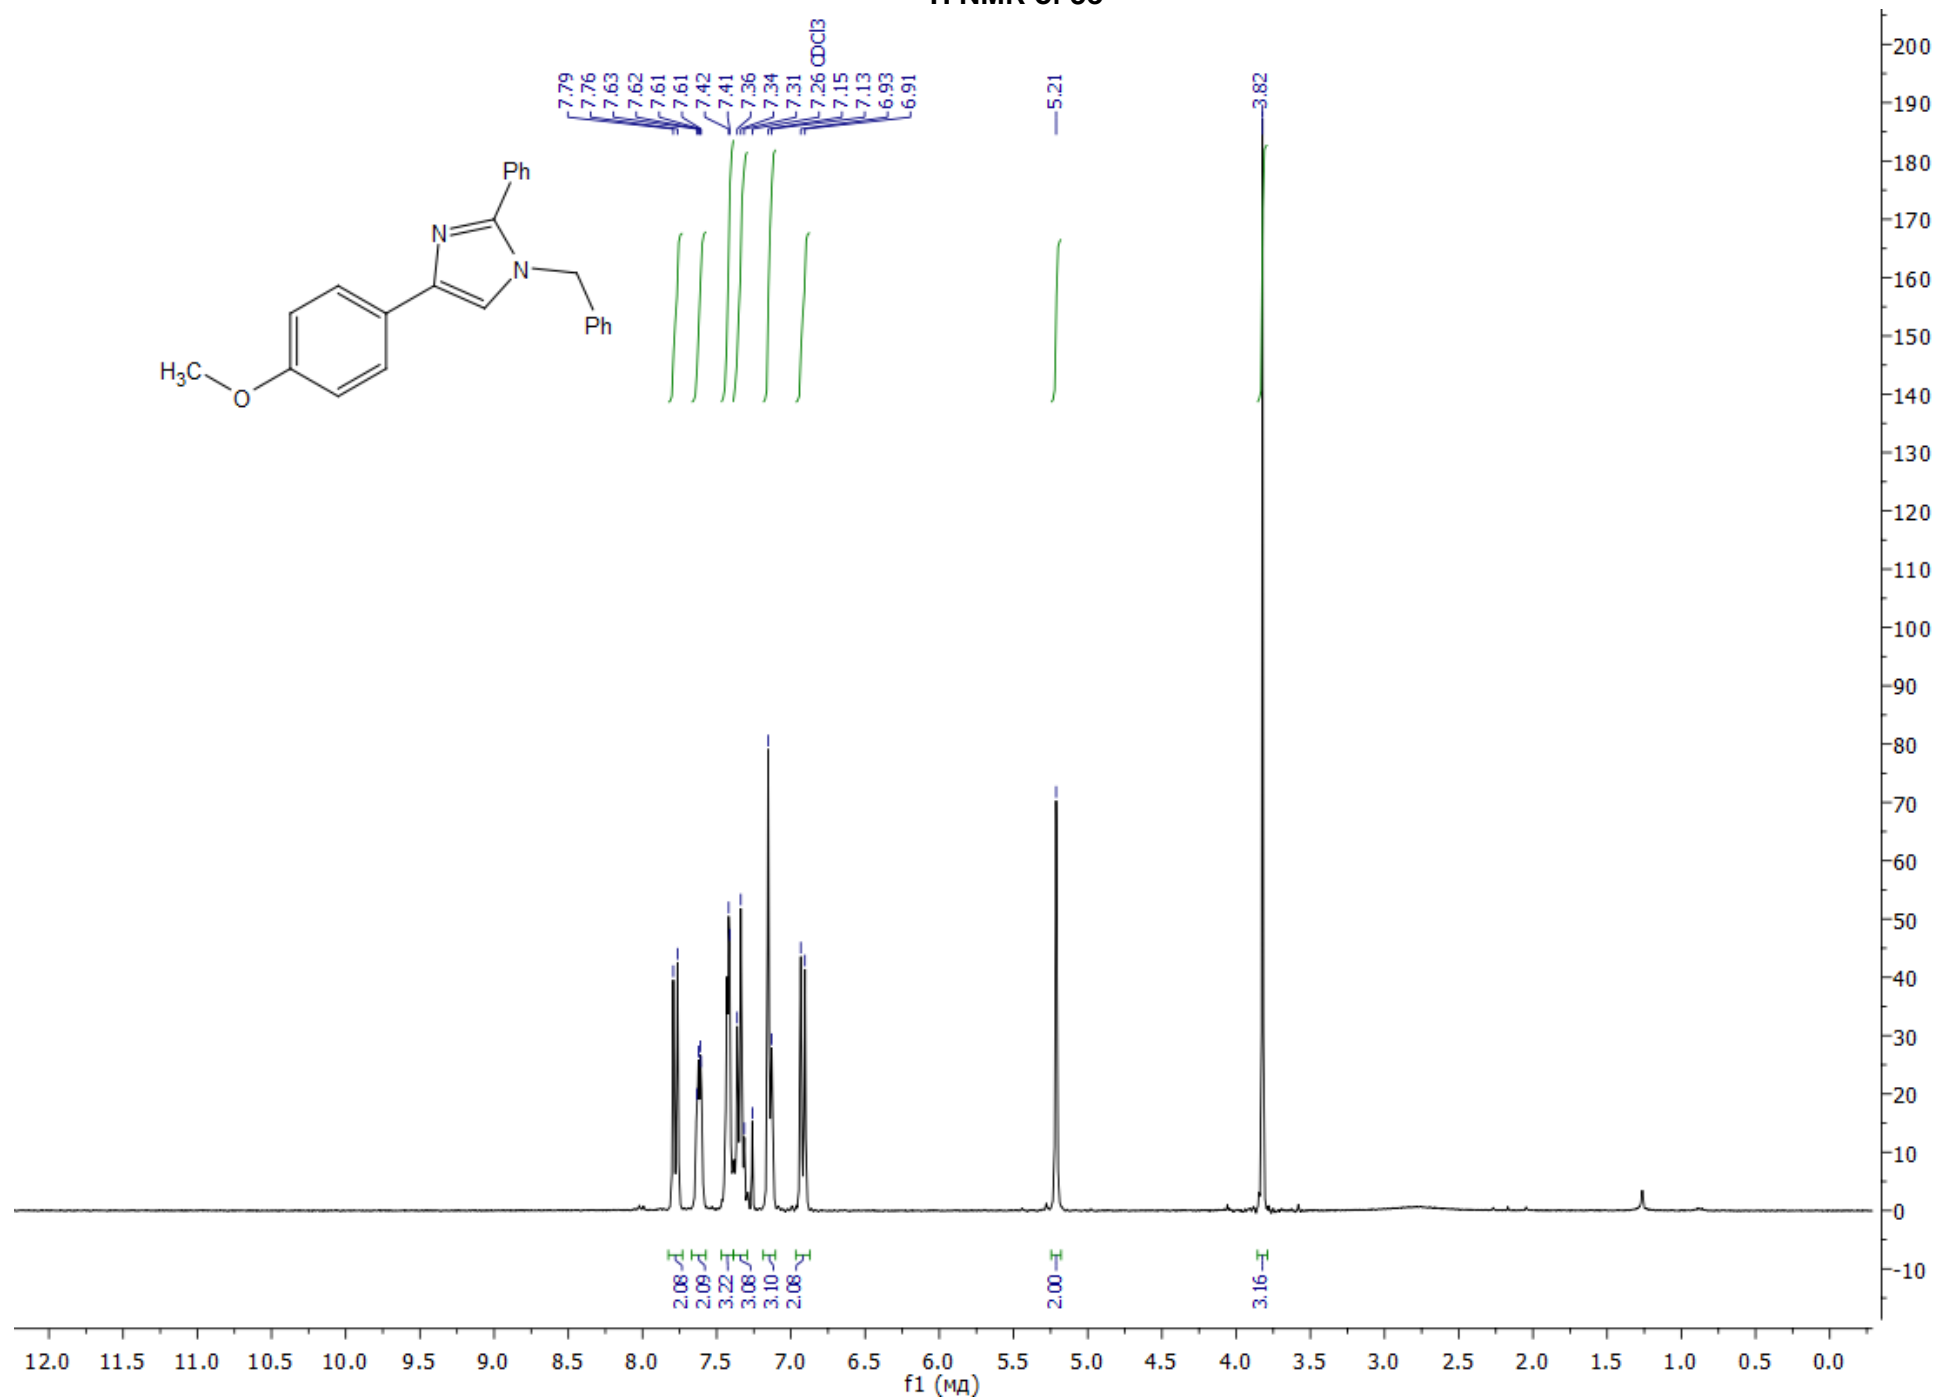

<sup>13</sup>C NMR of 3e

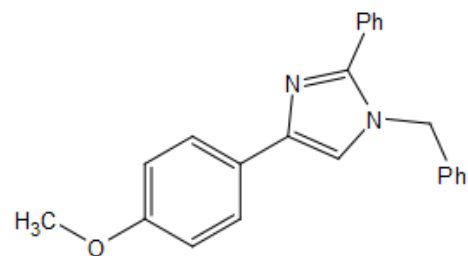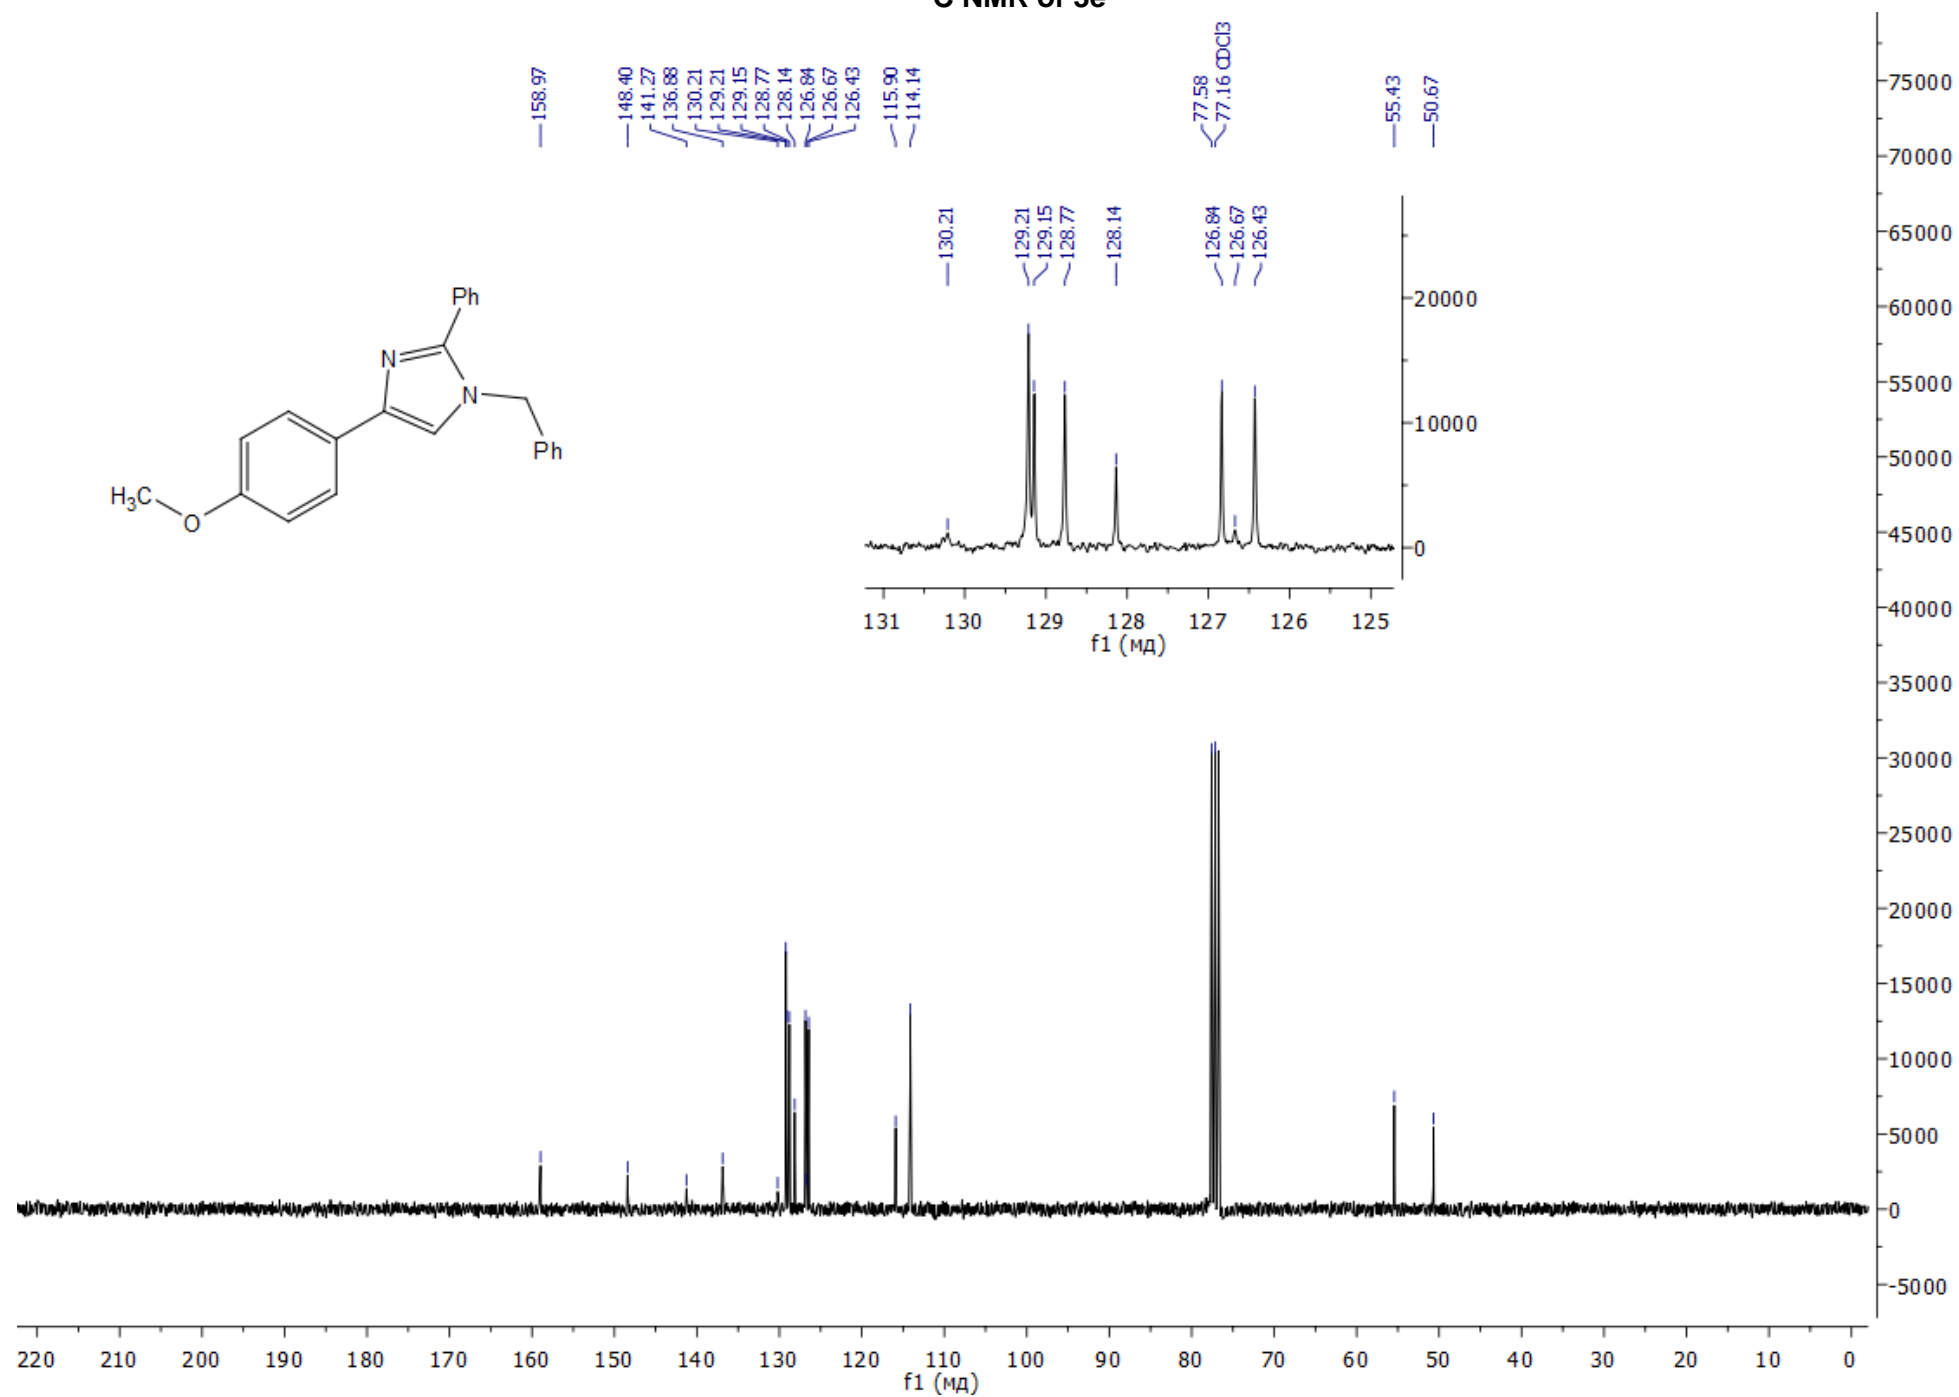

<sup>1</sup>H NMR of 3f

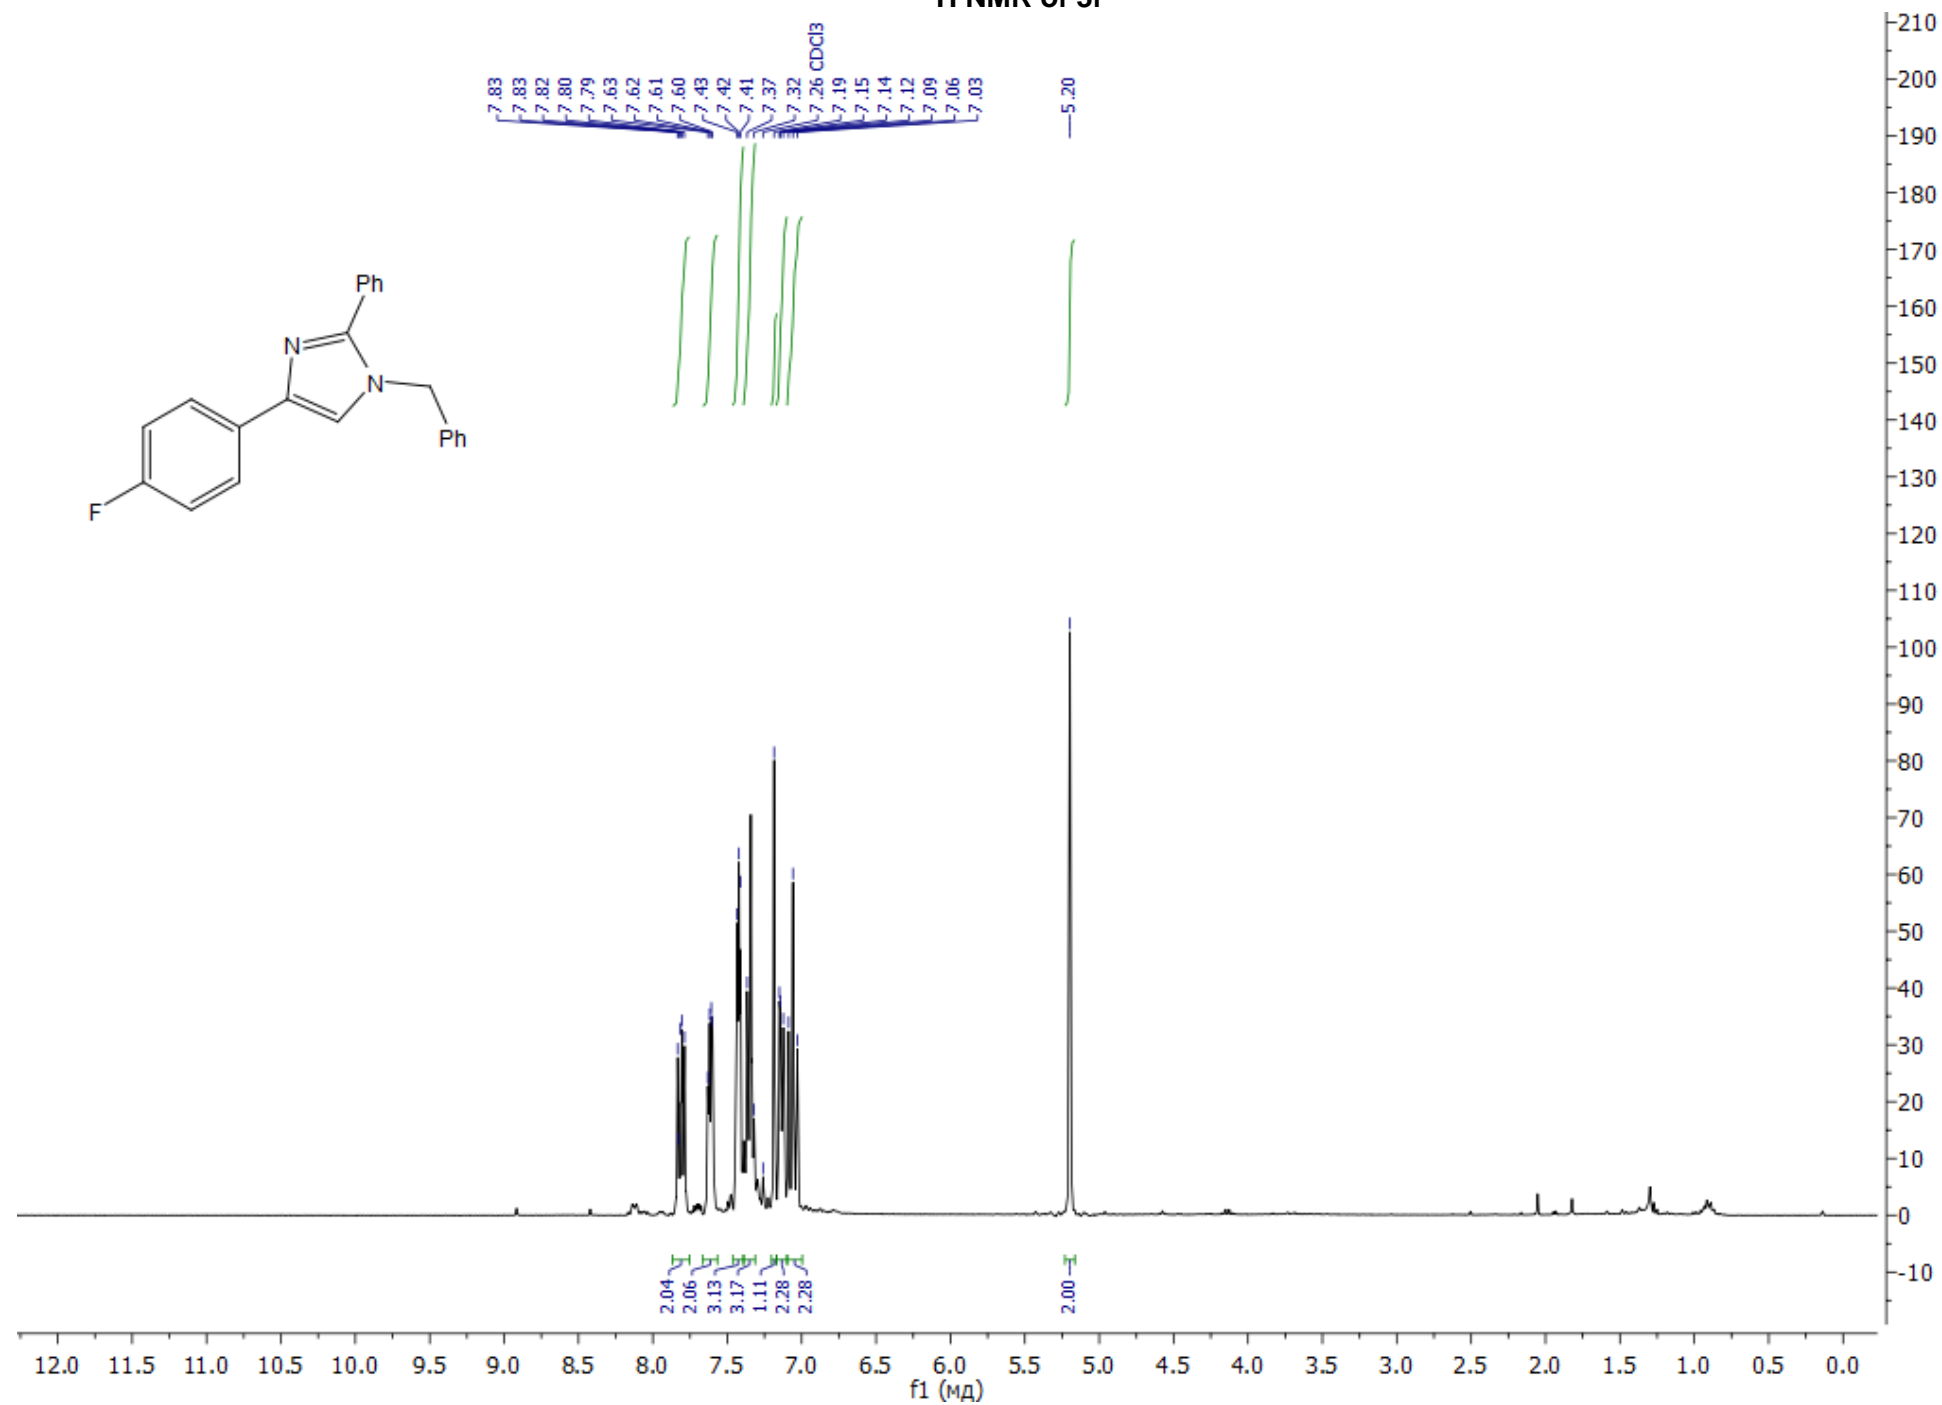

<sup>13</sup>C NMR of 3f

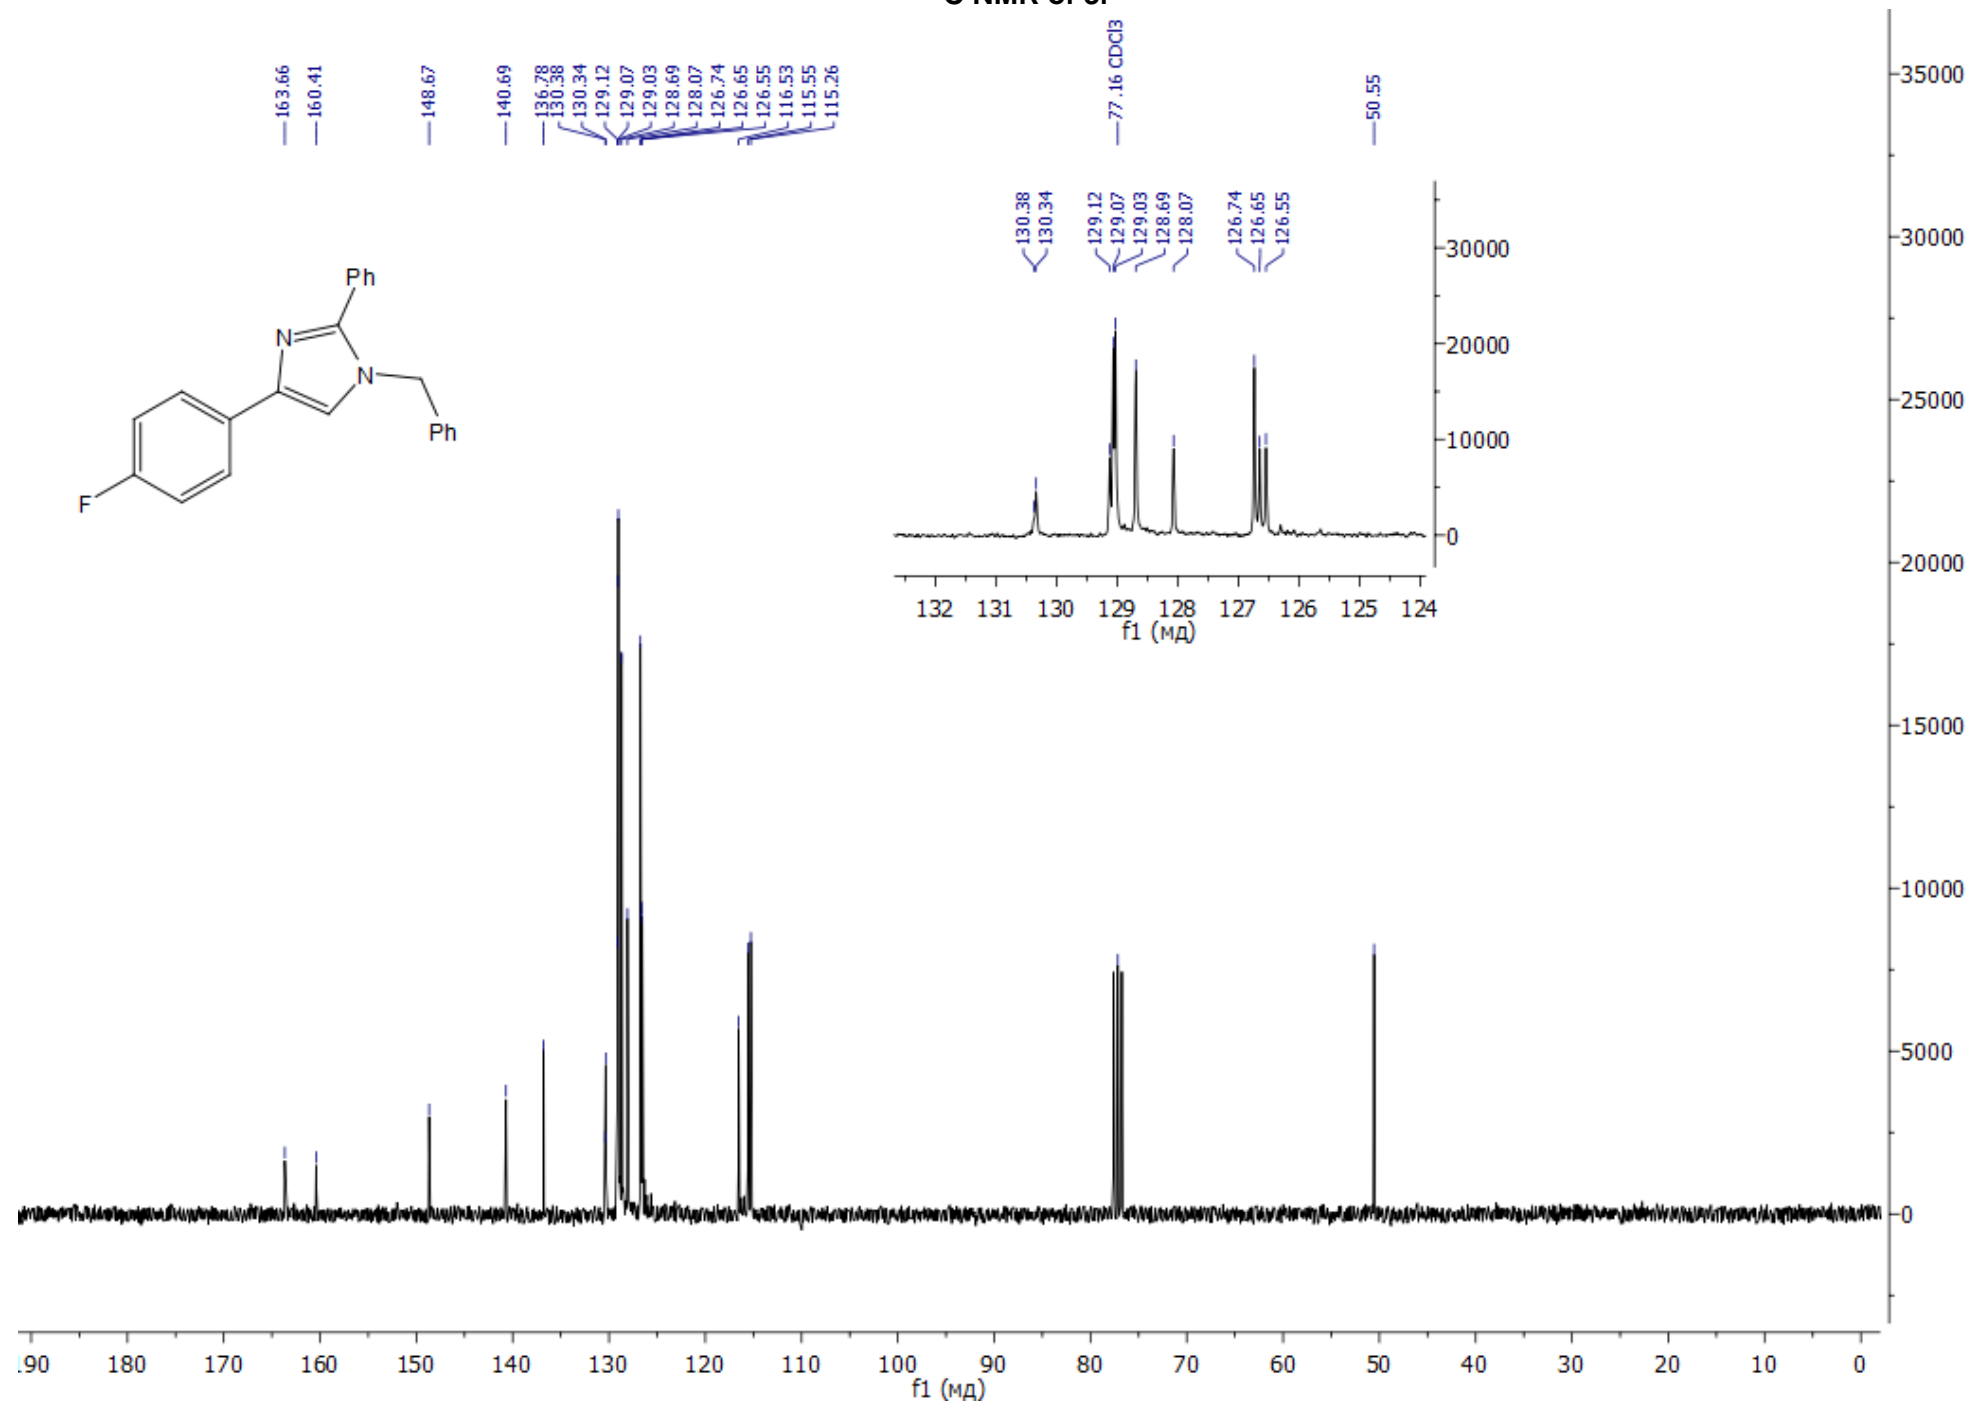

<sup>1</sup>H NMR of 3g

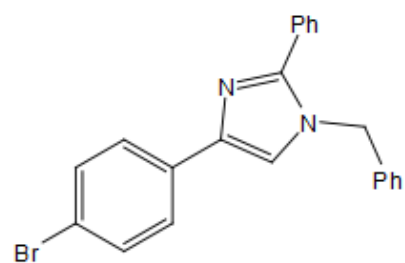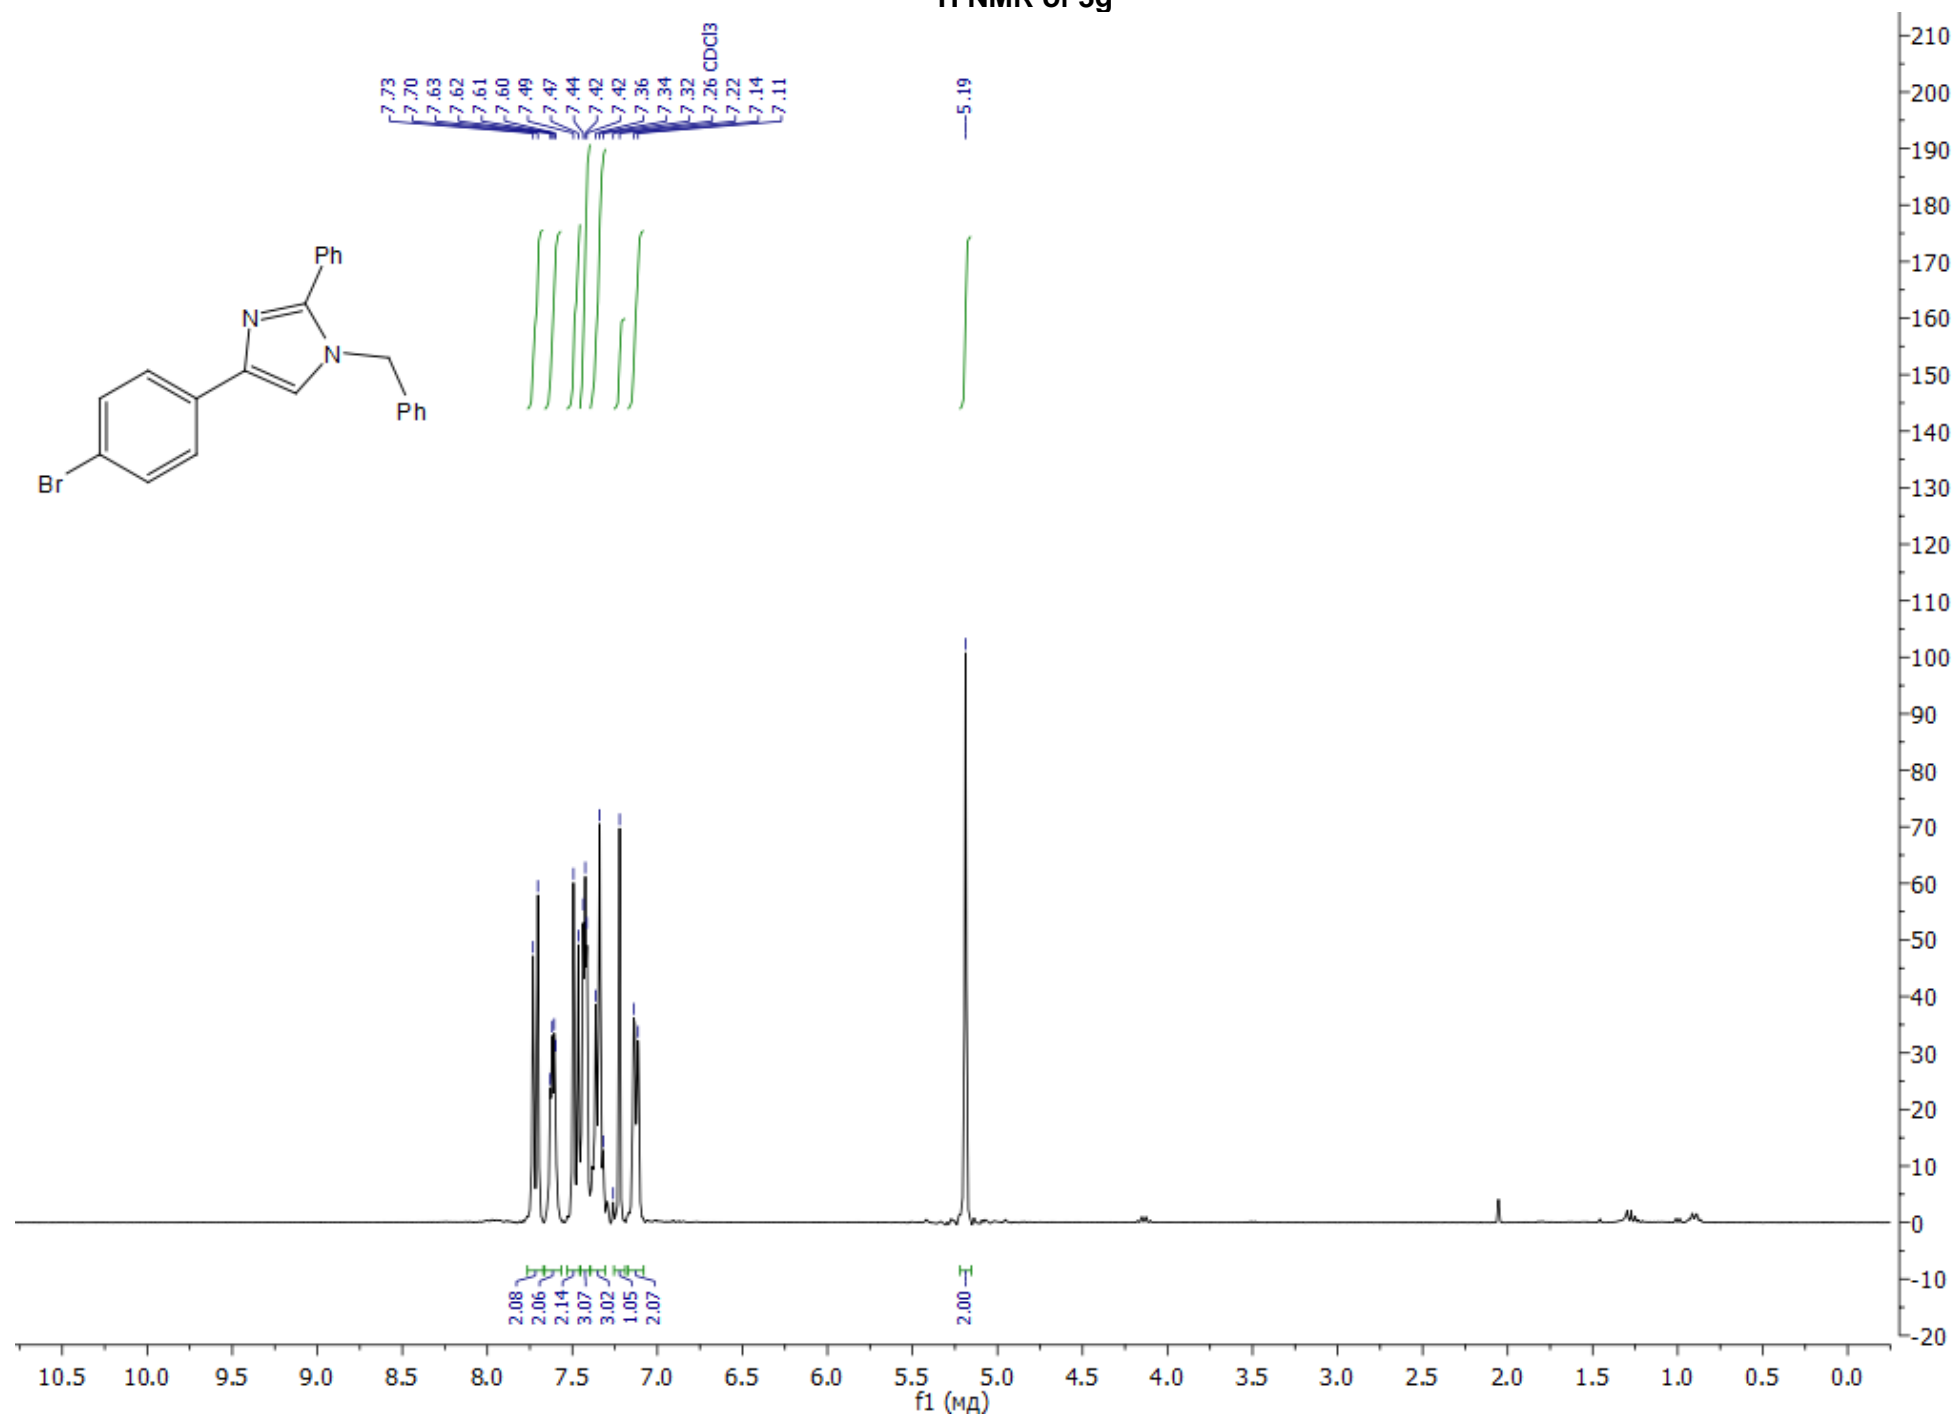

<sup>13</sup>C NMR of 3g

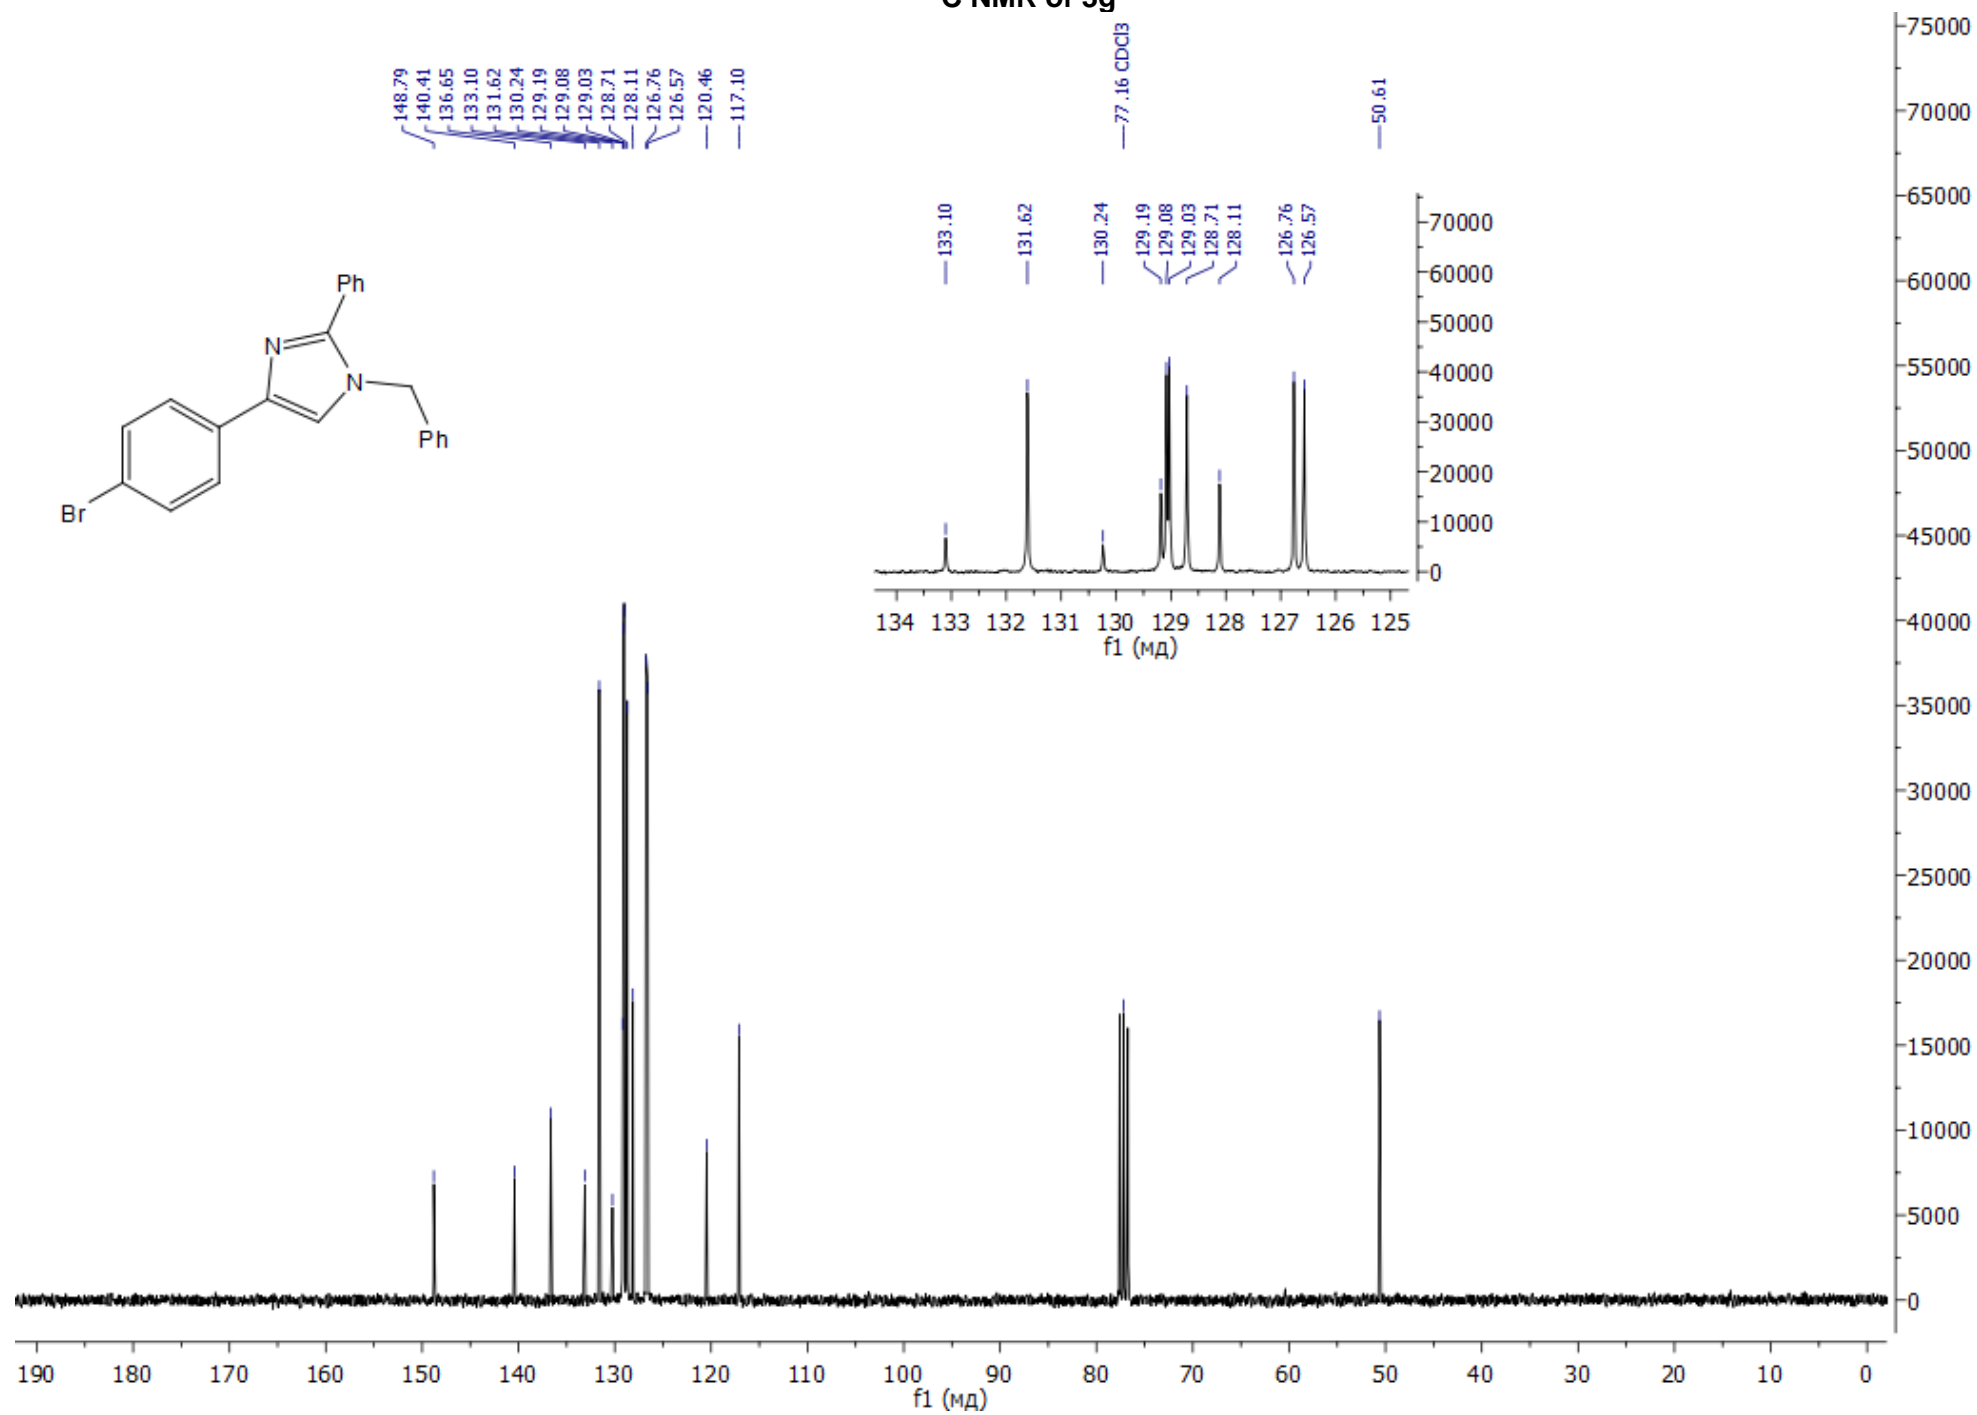



<sup>1</sup>H NMR of 3h

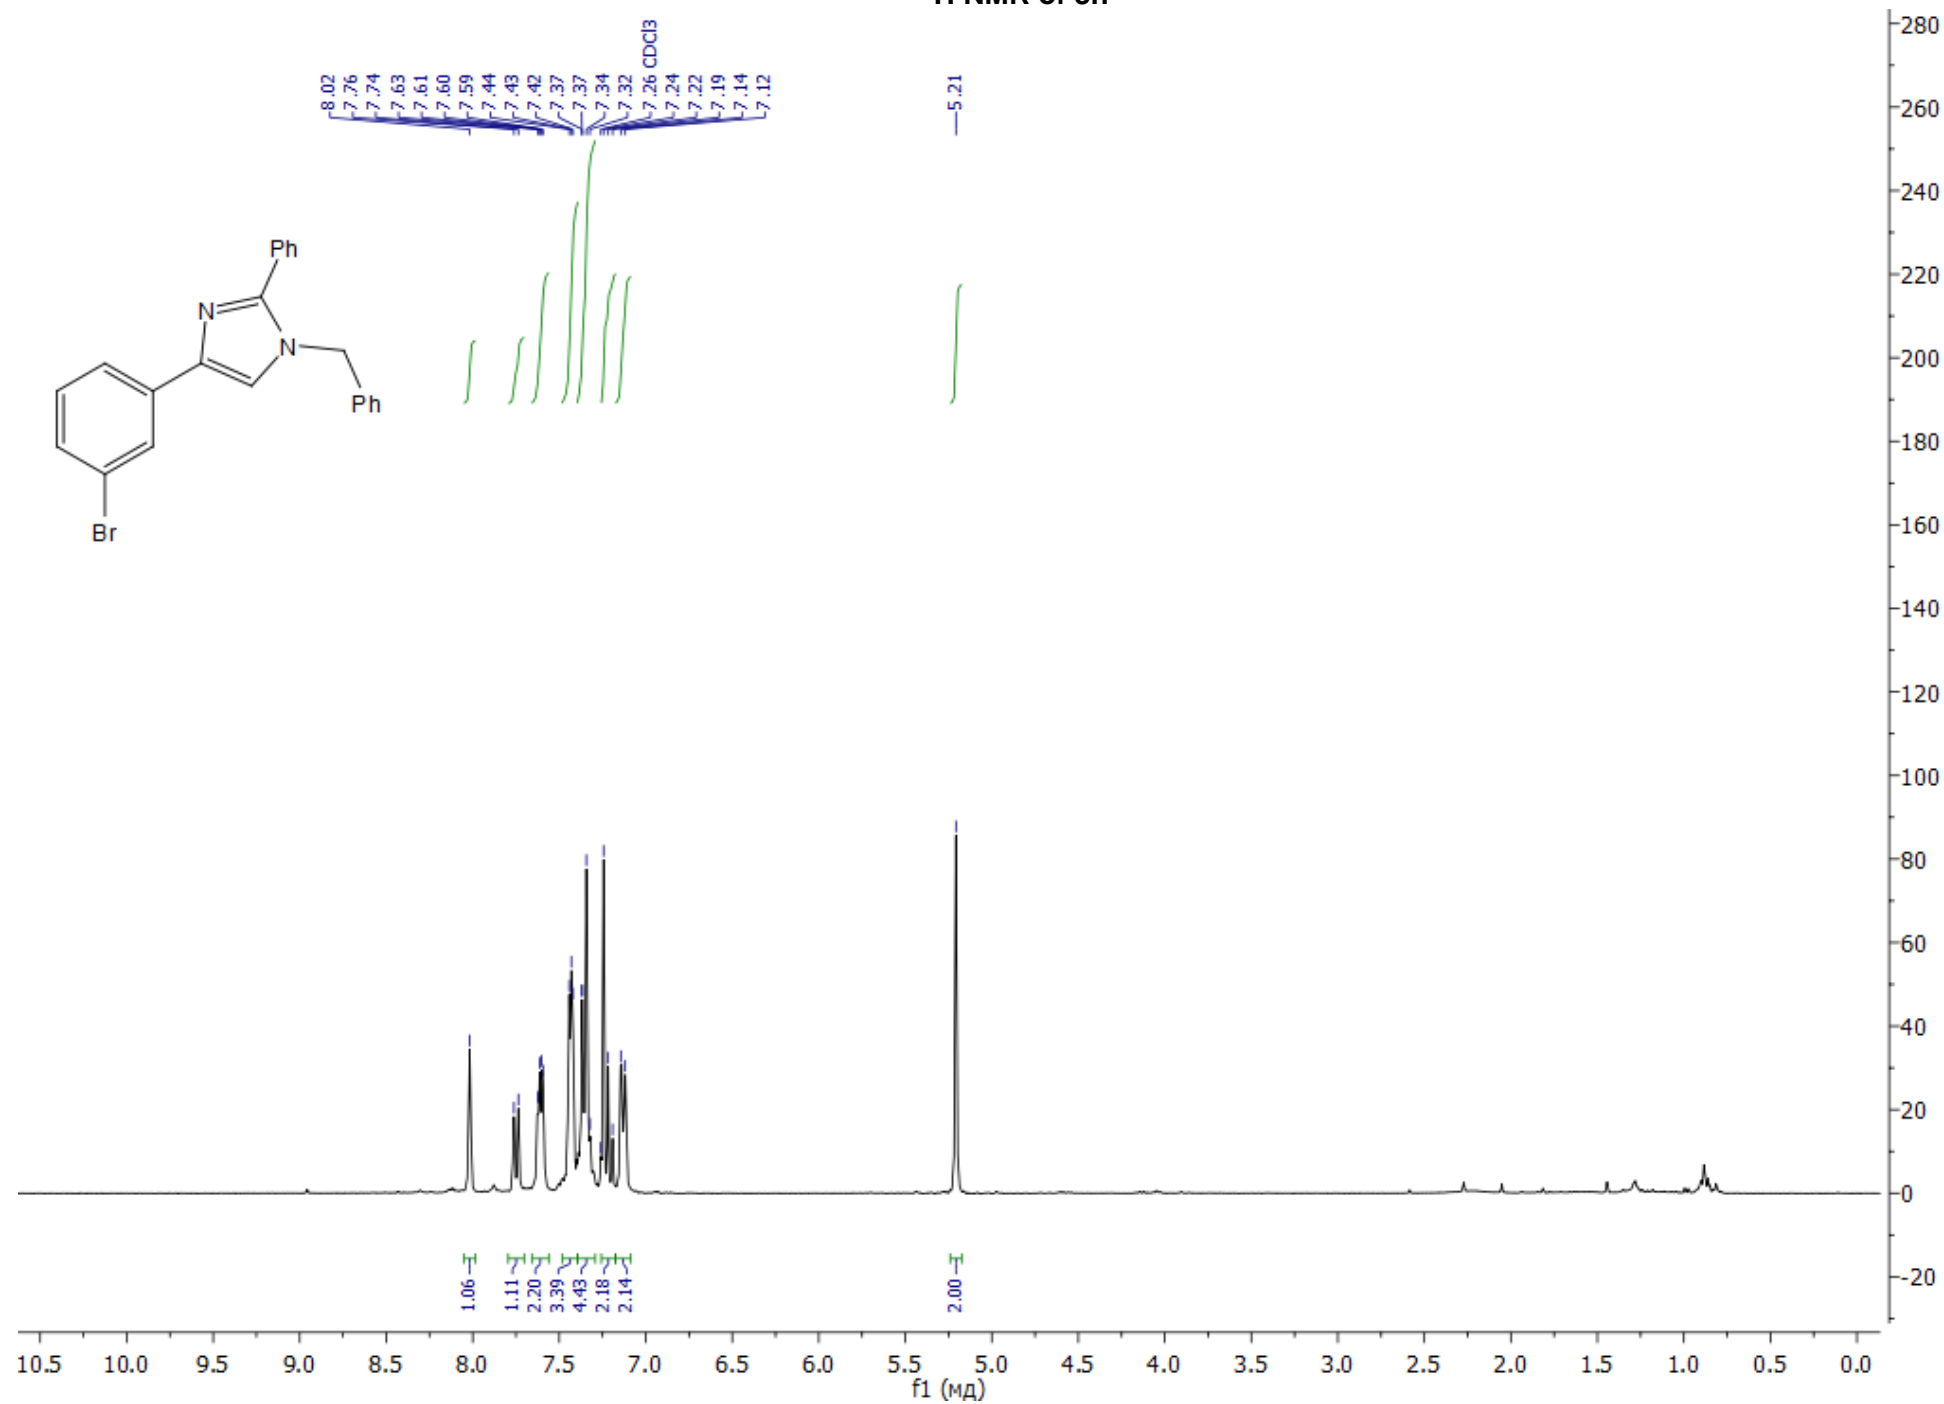

<sup>13</sup>C NMR of 3h

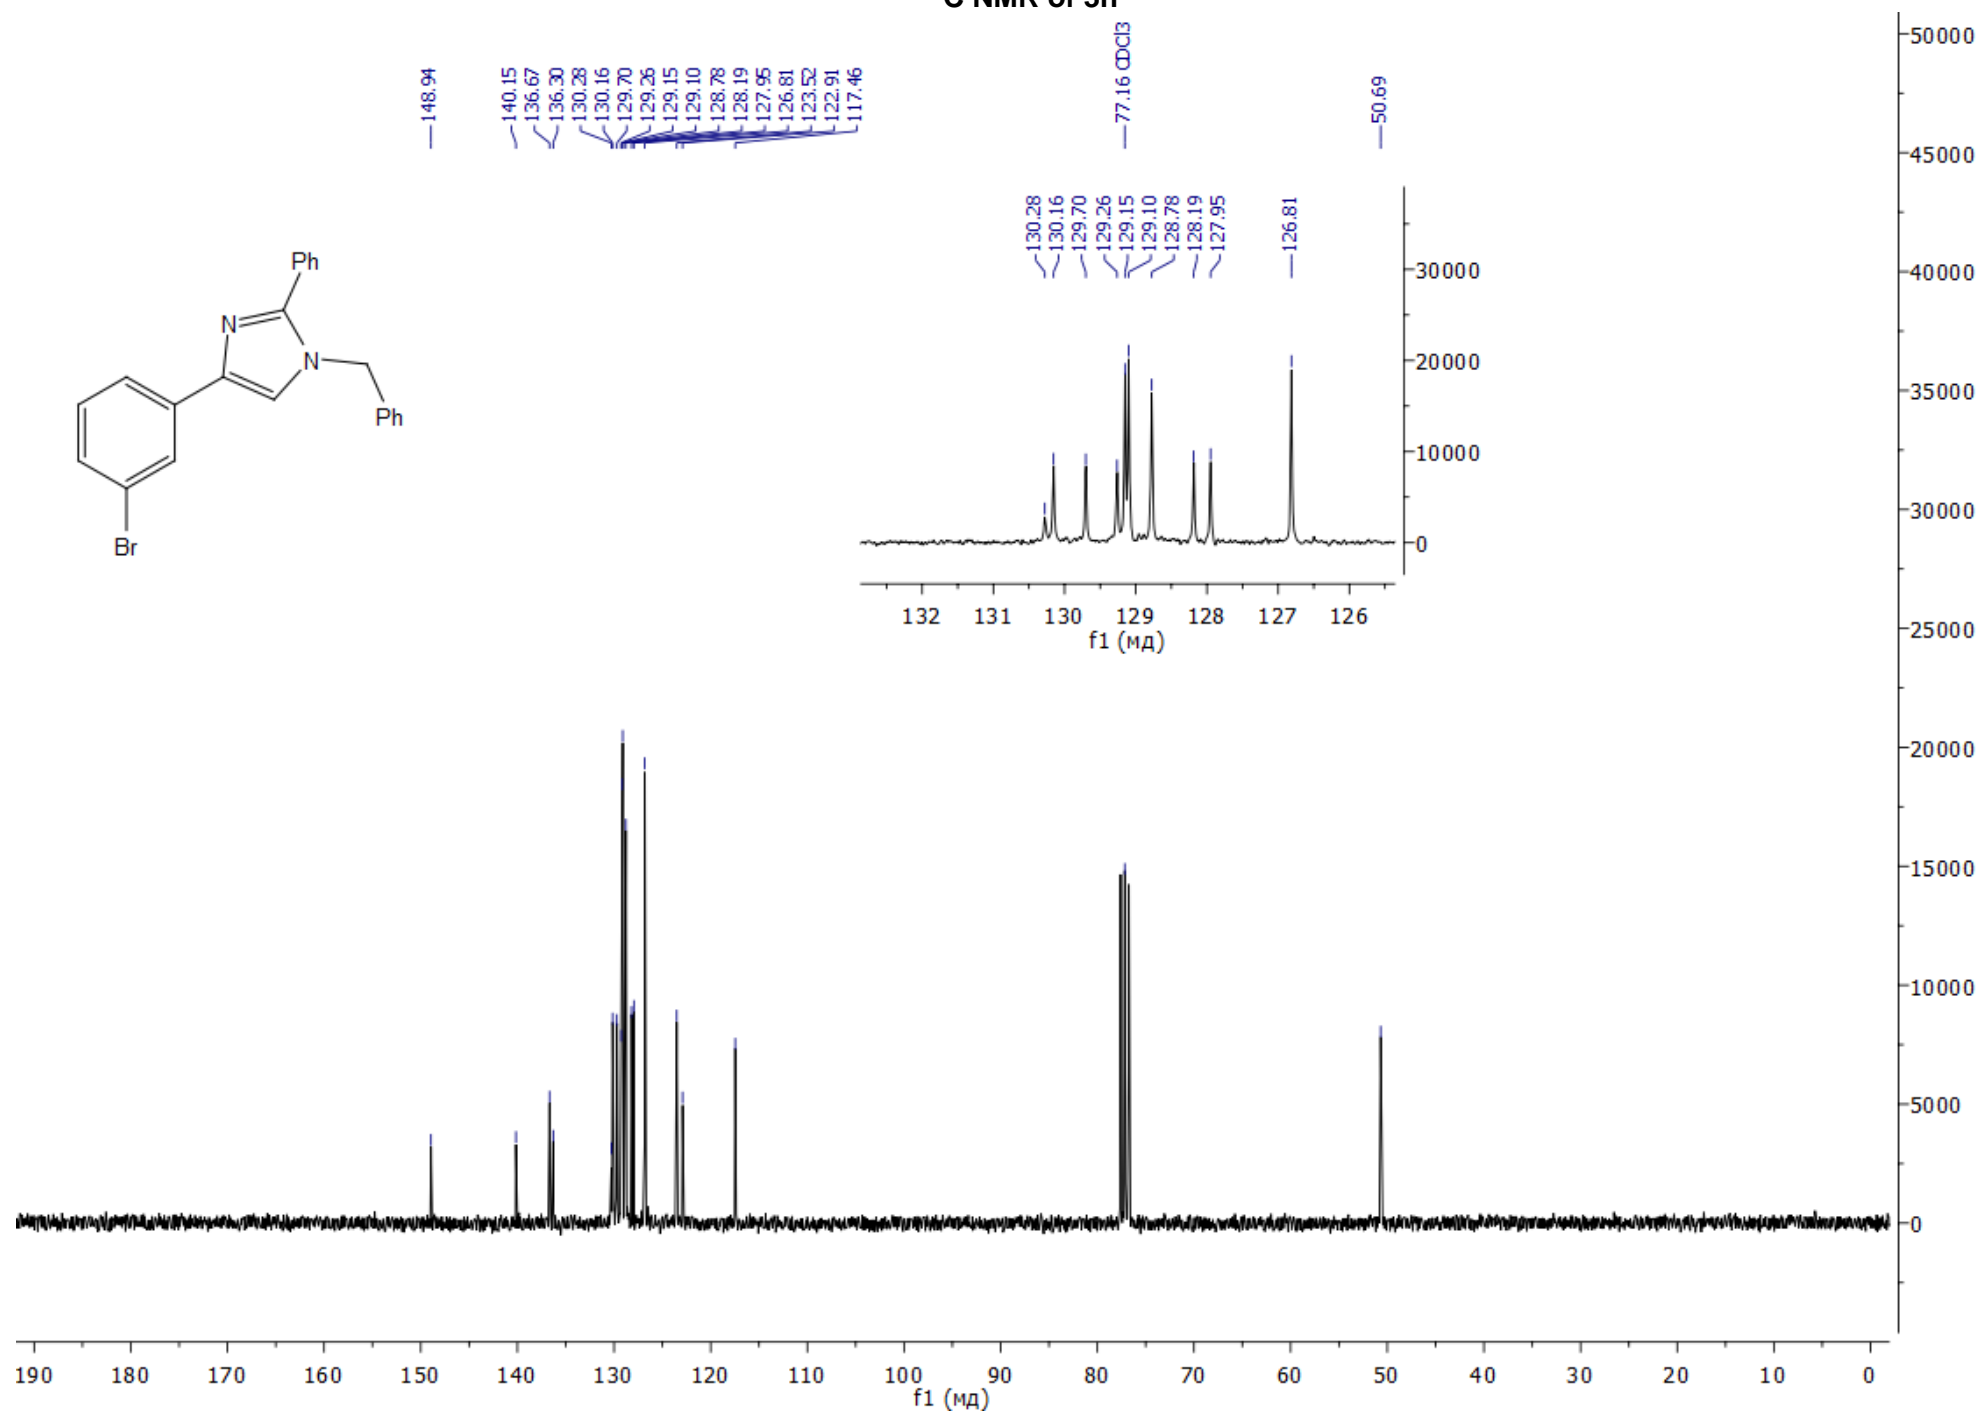

<sup>1</sup>H NMR of 3i

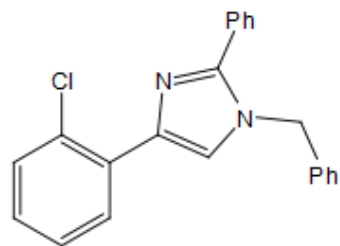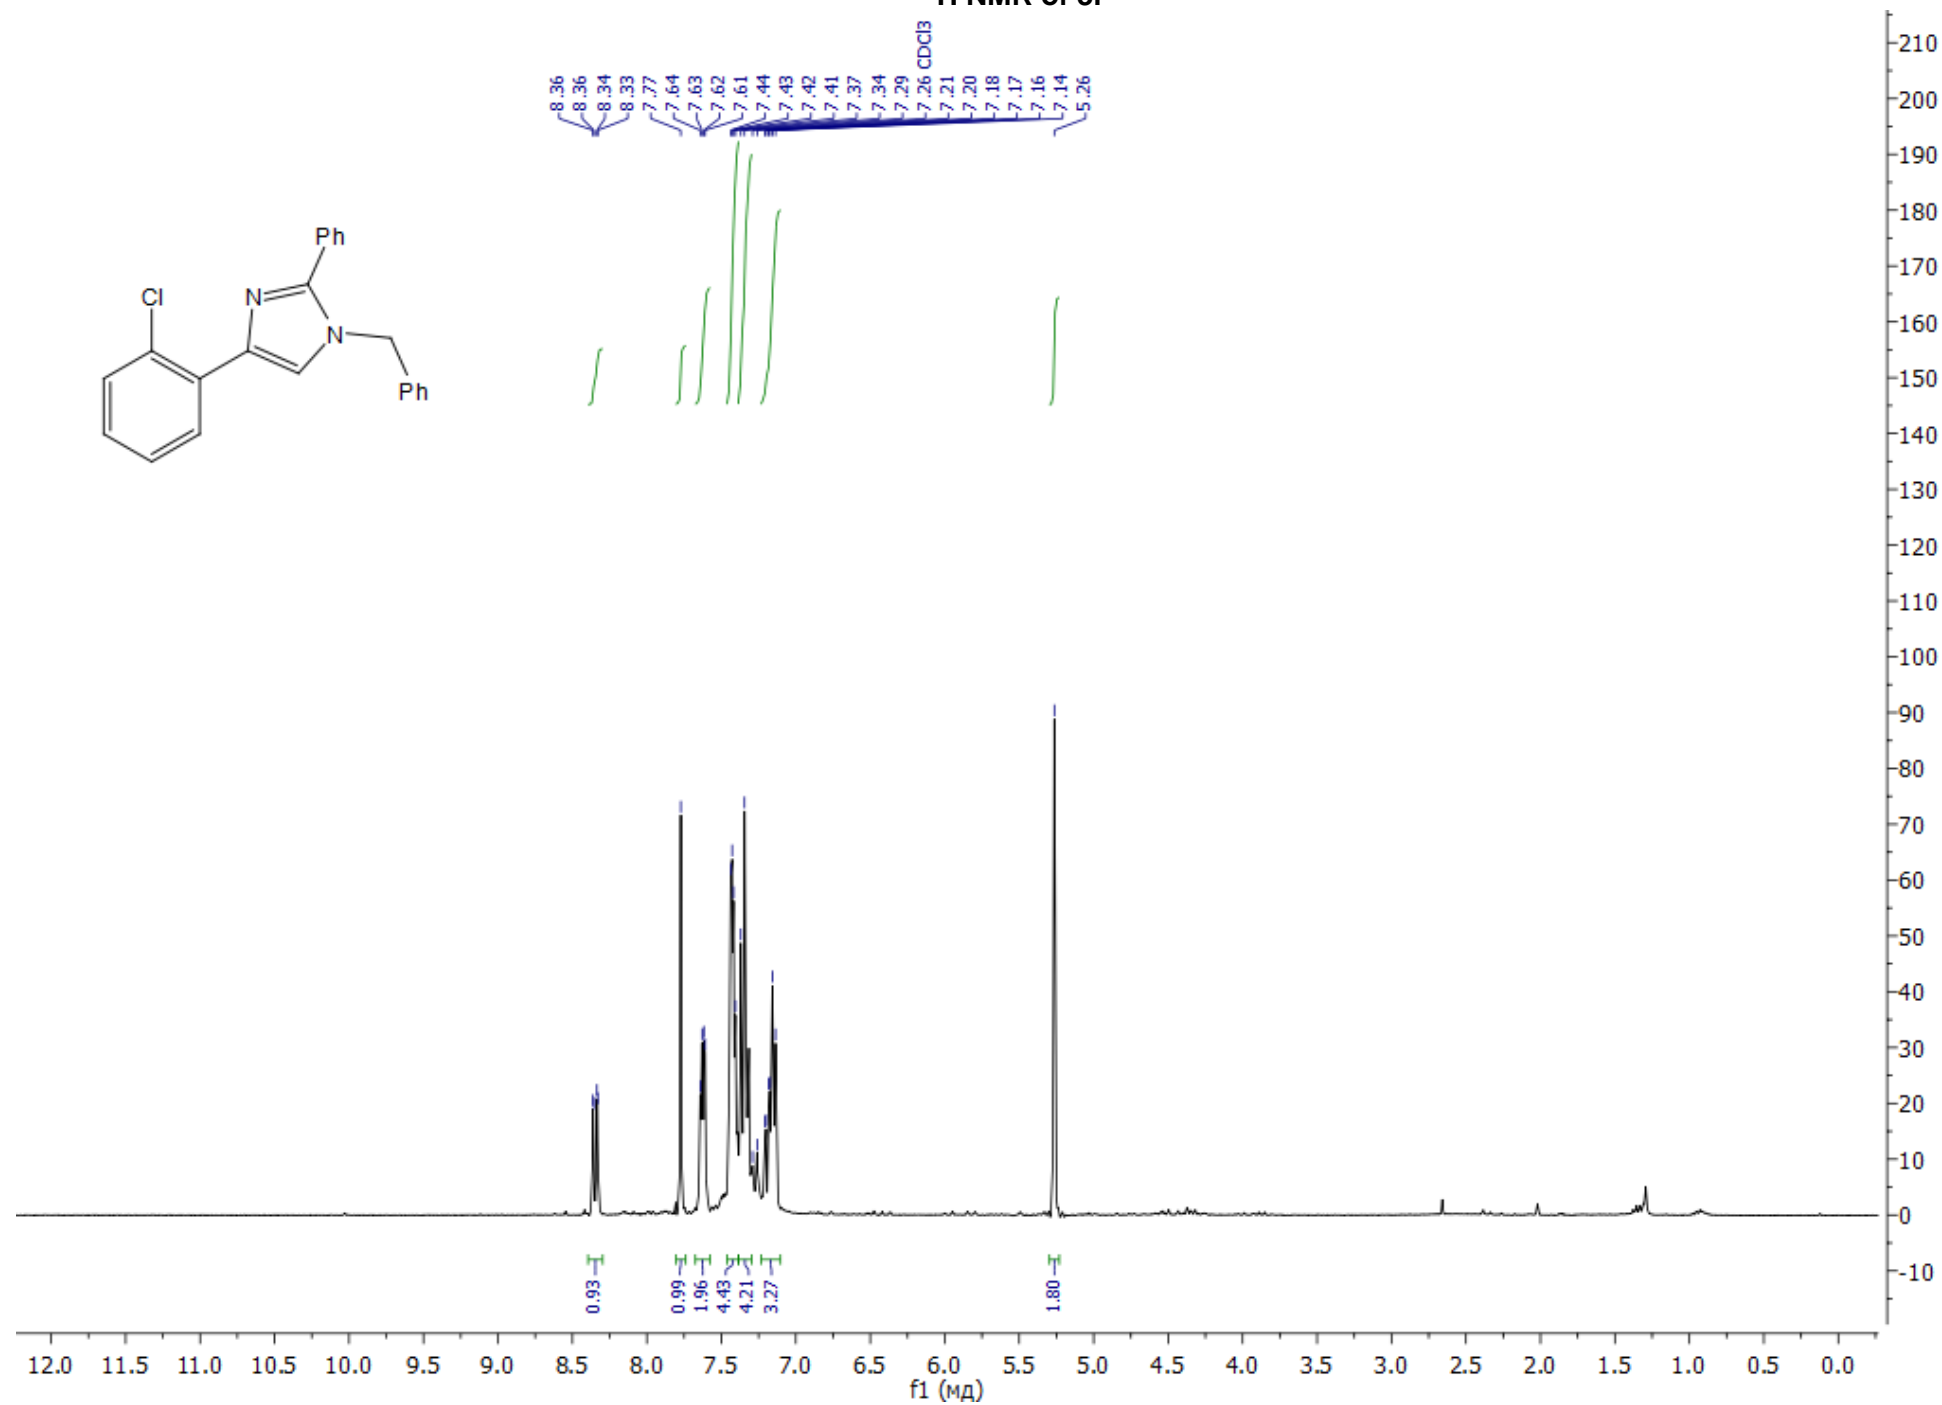

<sup>13</sup>C NMR of 3i

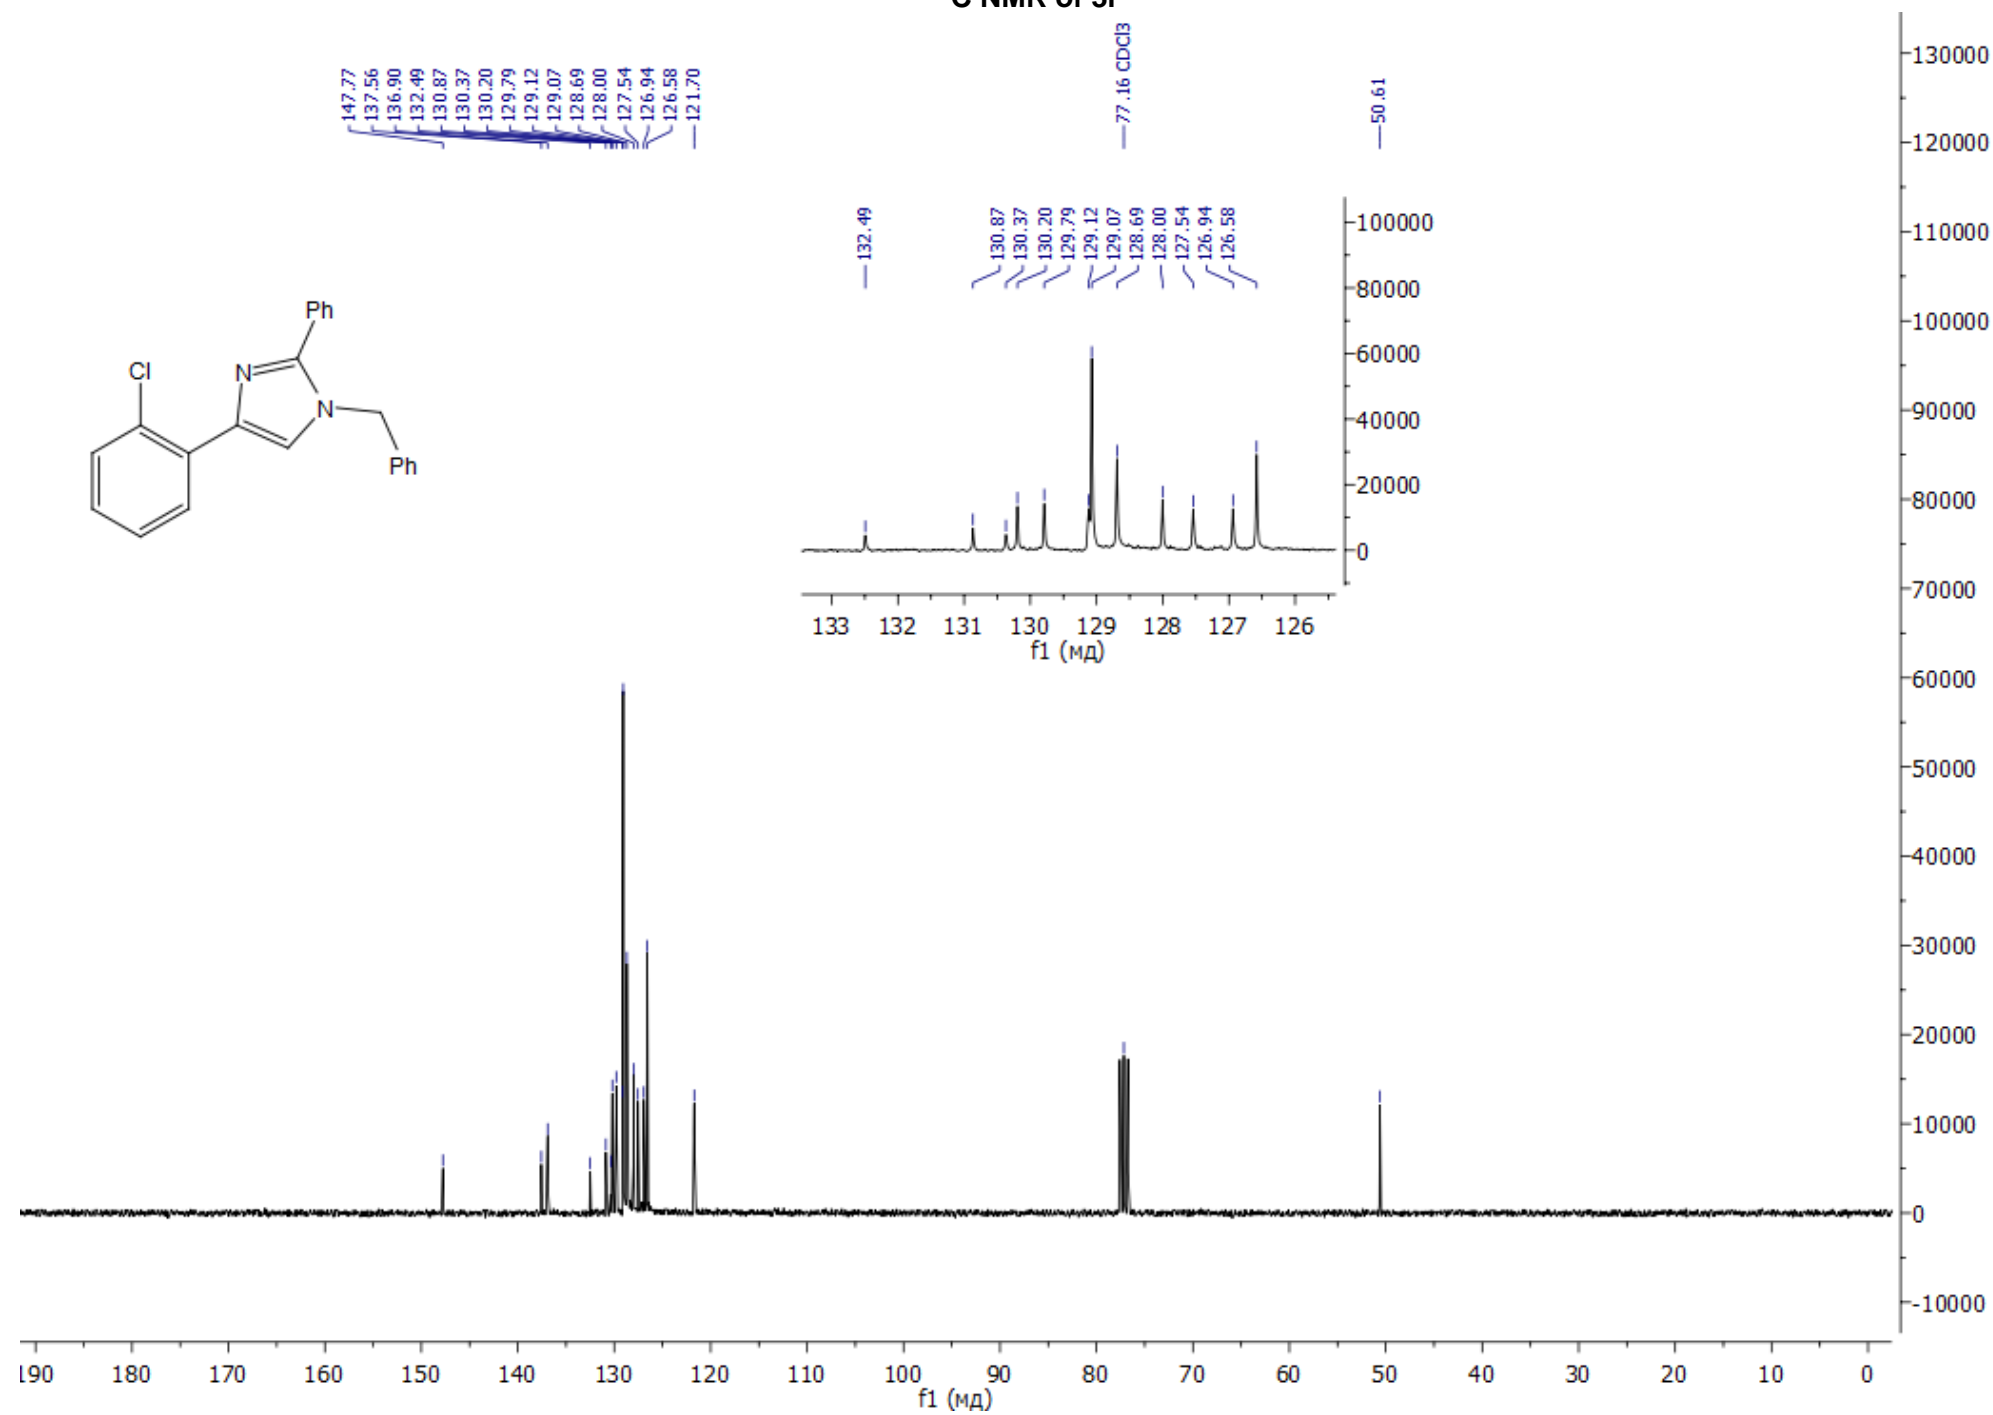

<sup>1</sup>H NMR of 3j

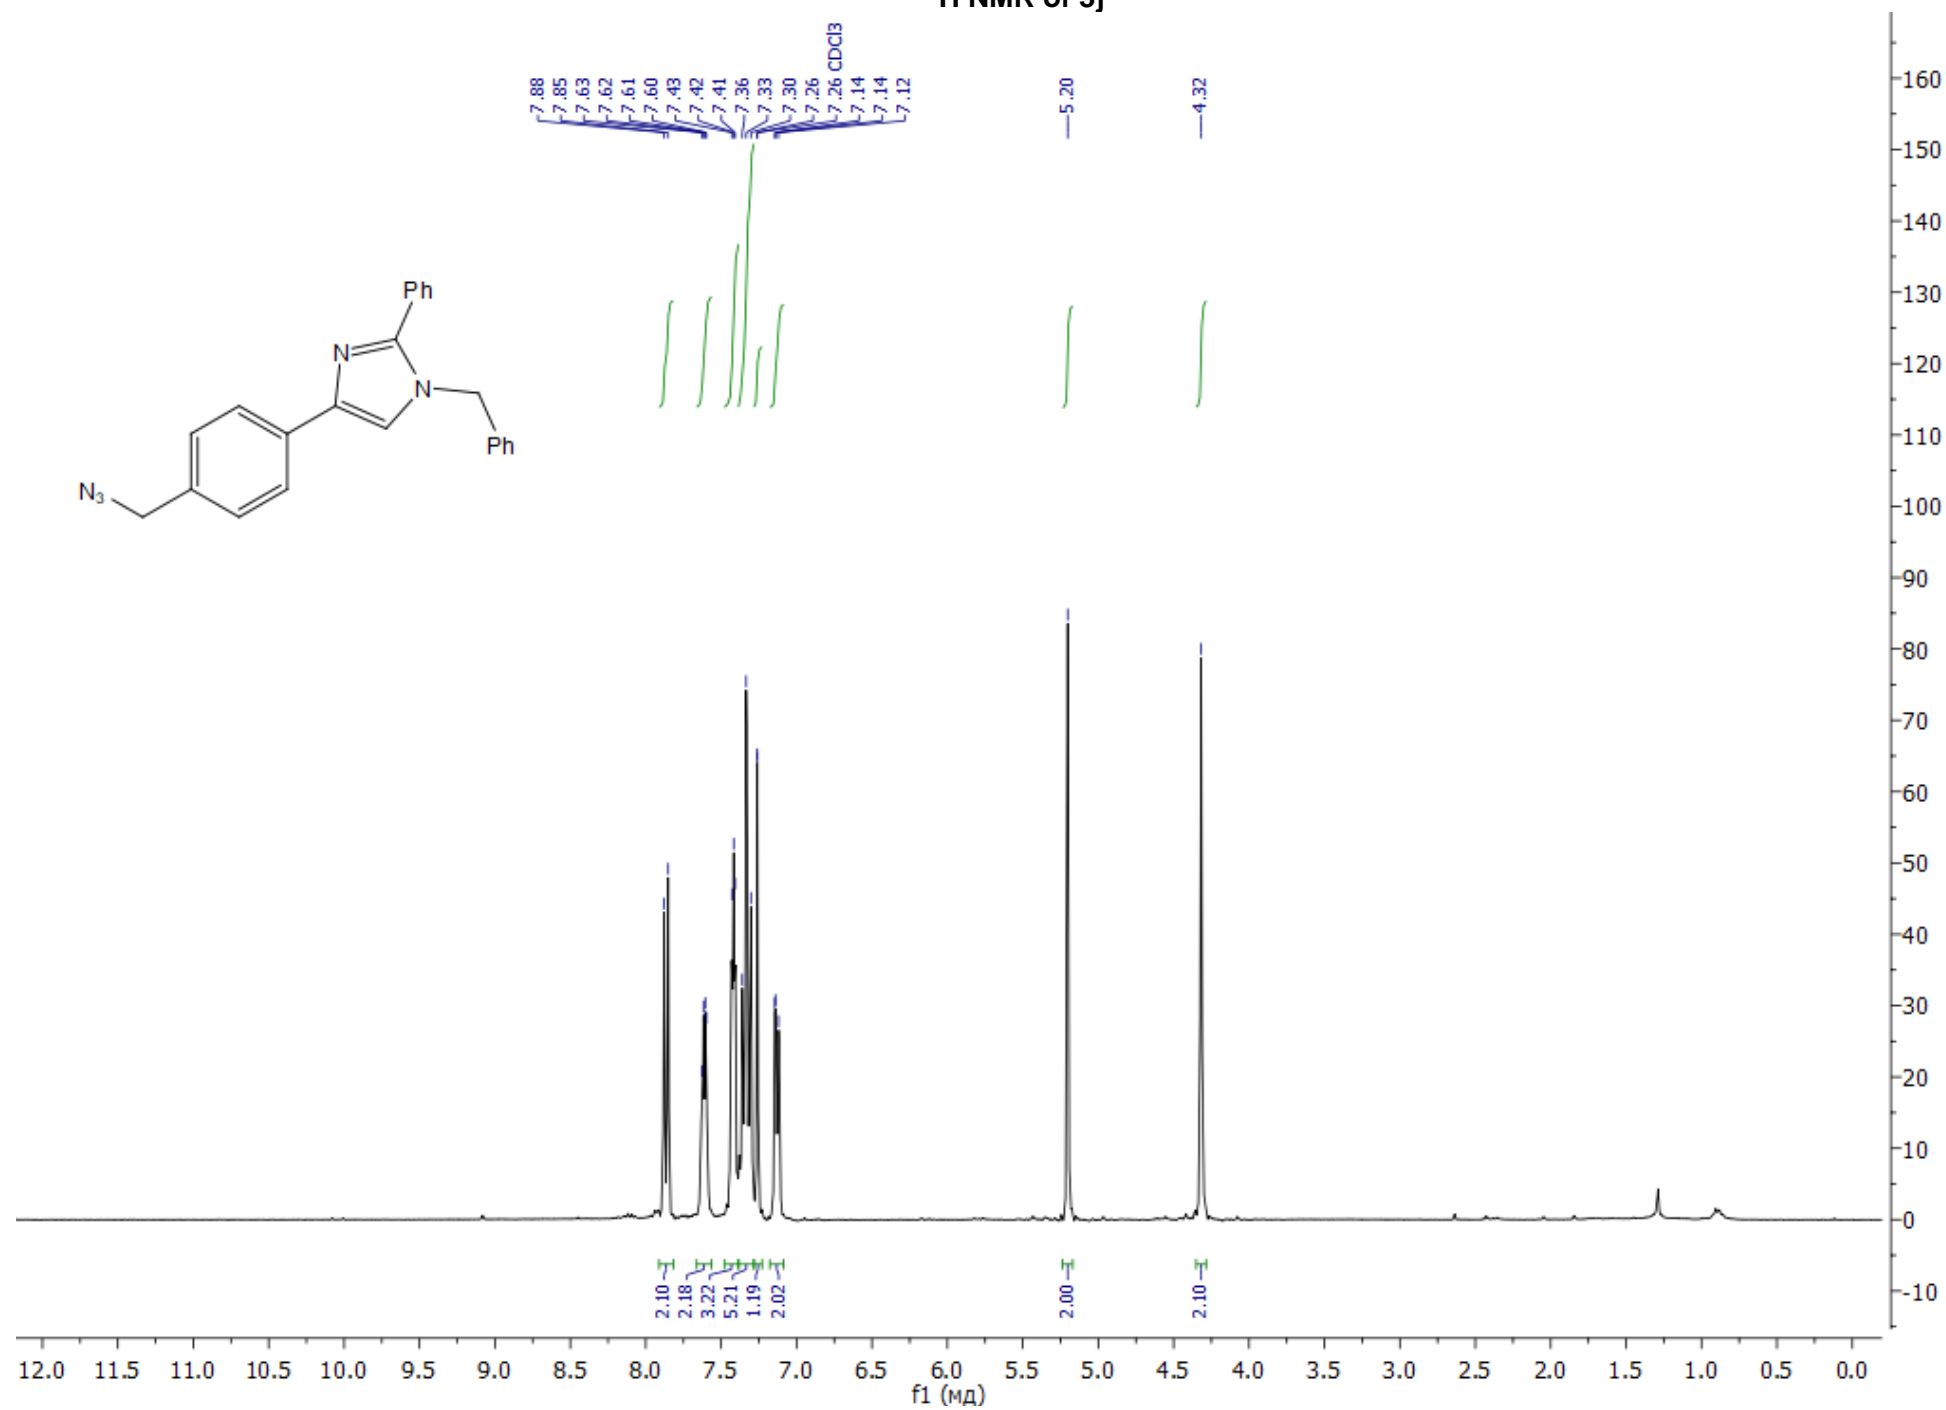

<sup>13</sup>C NMR of 3j

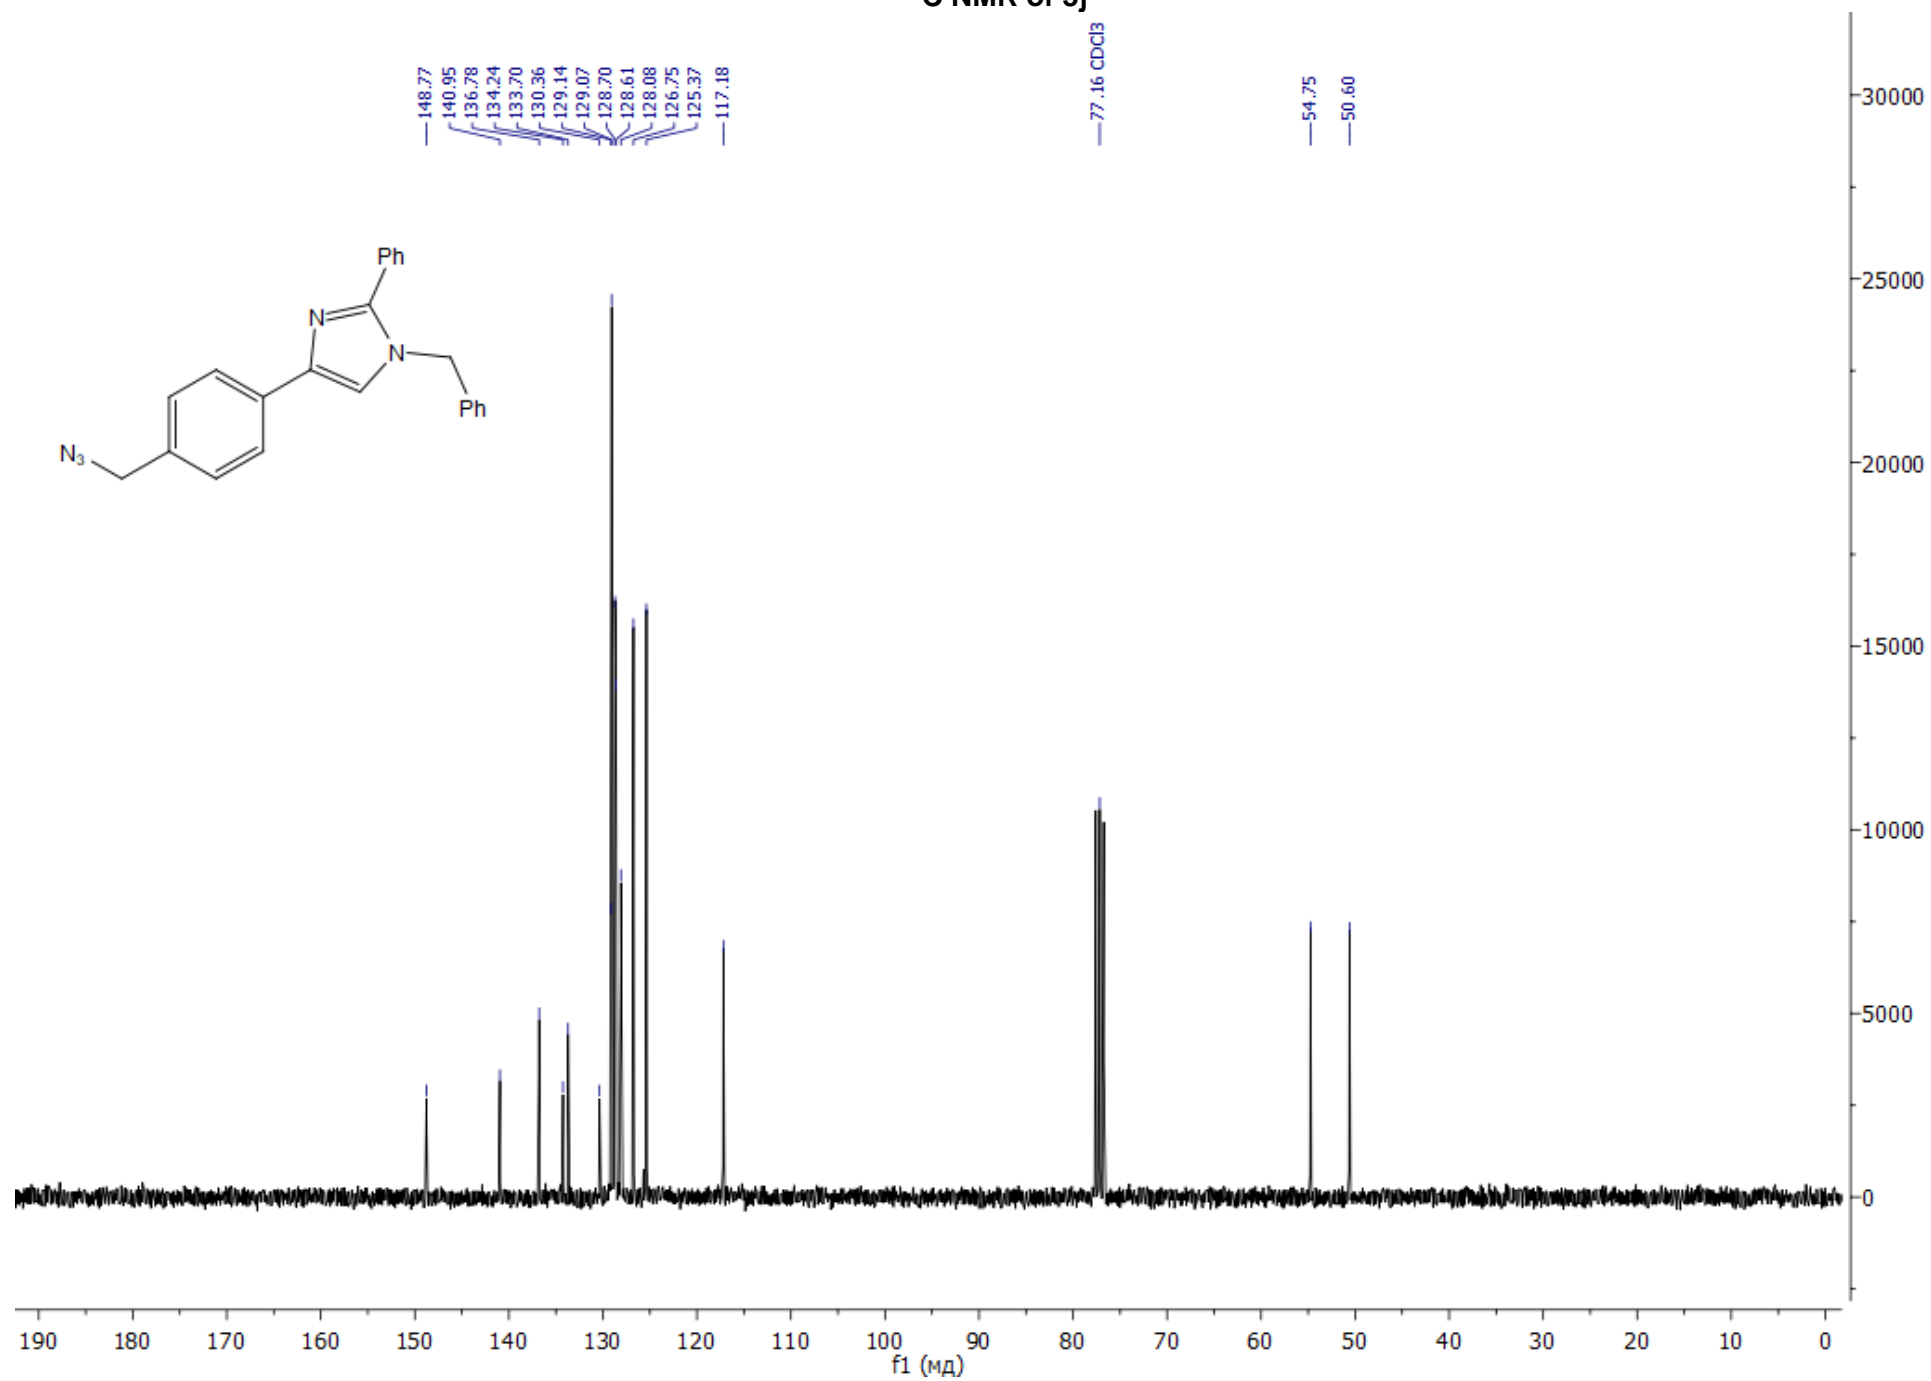

<sup>1</sup>H NMR of 3I

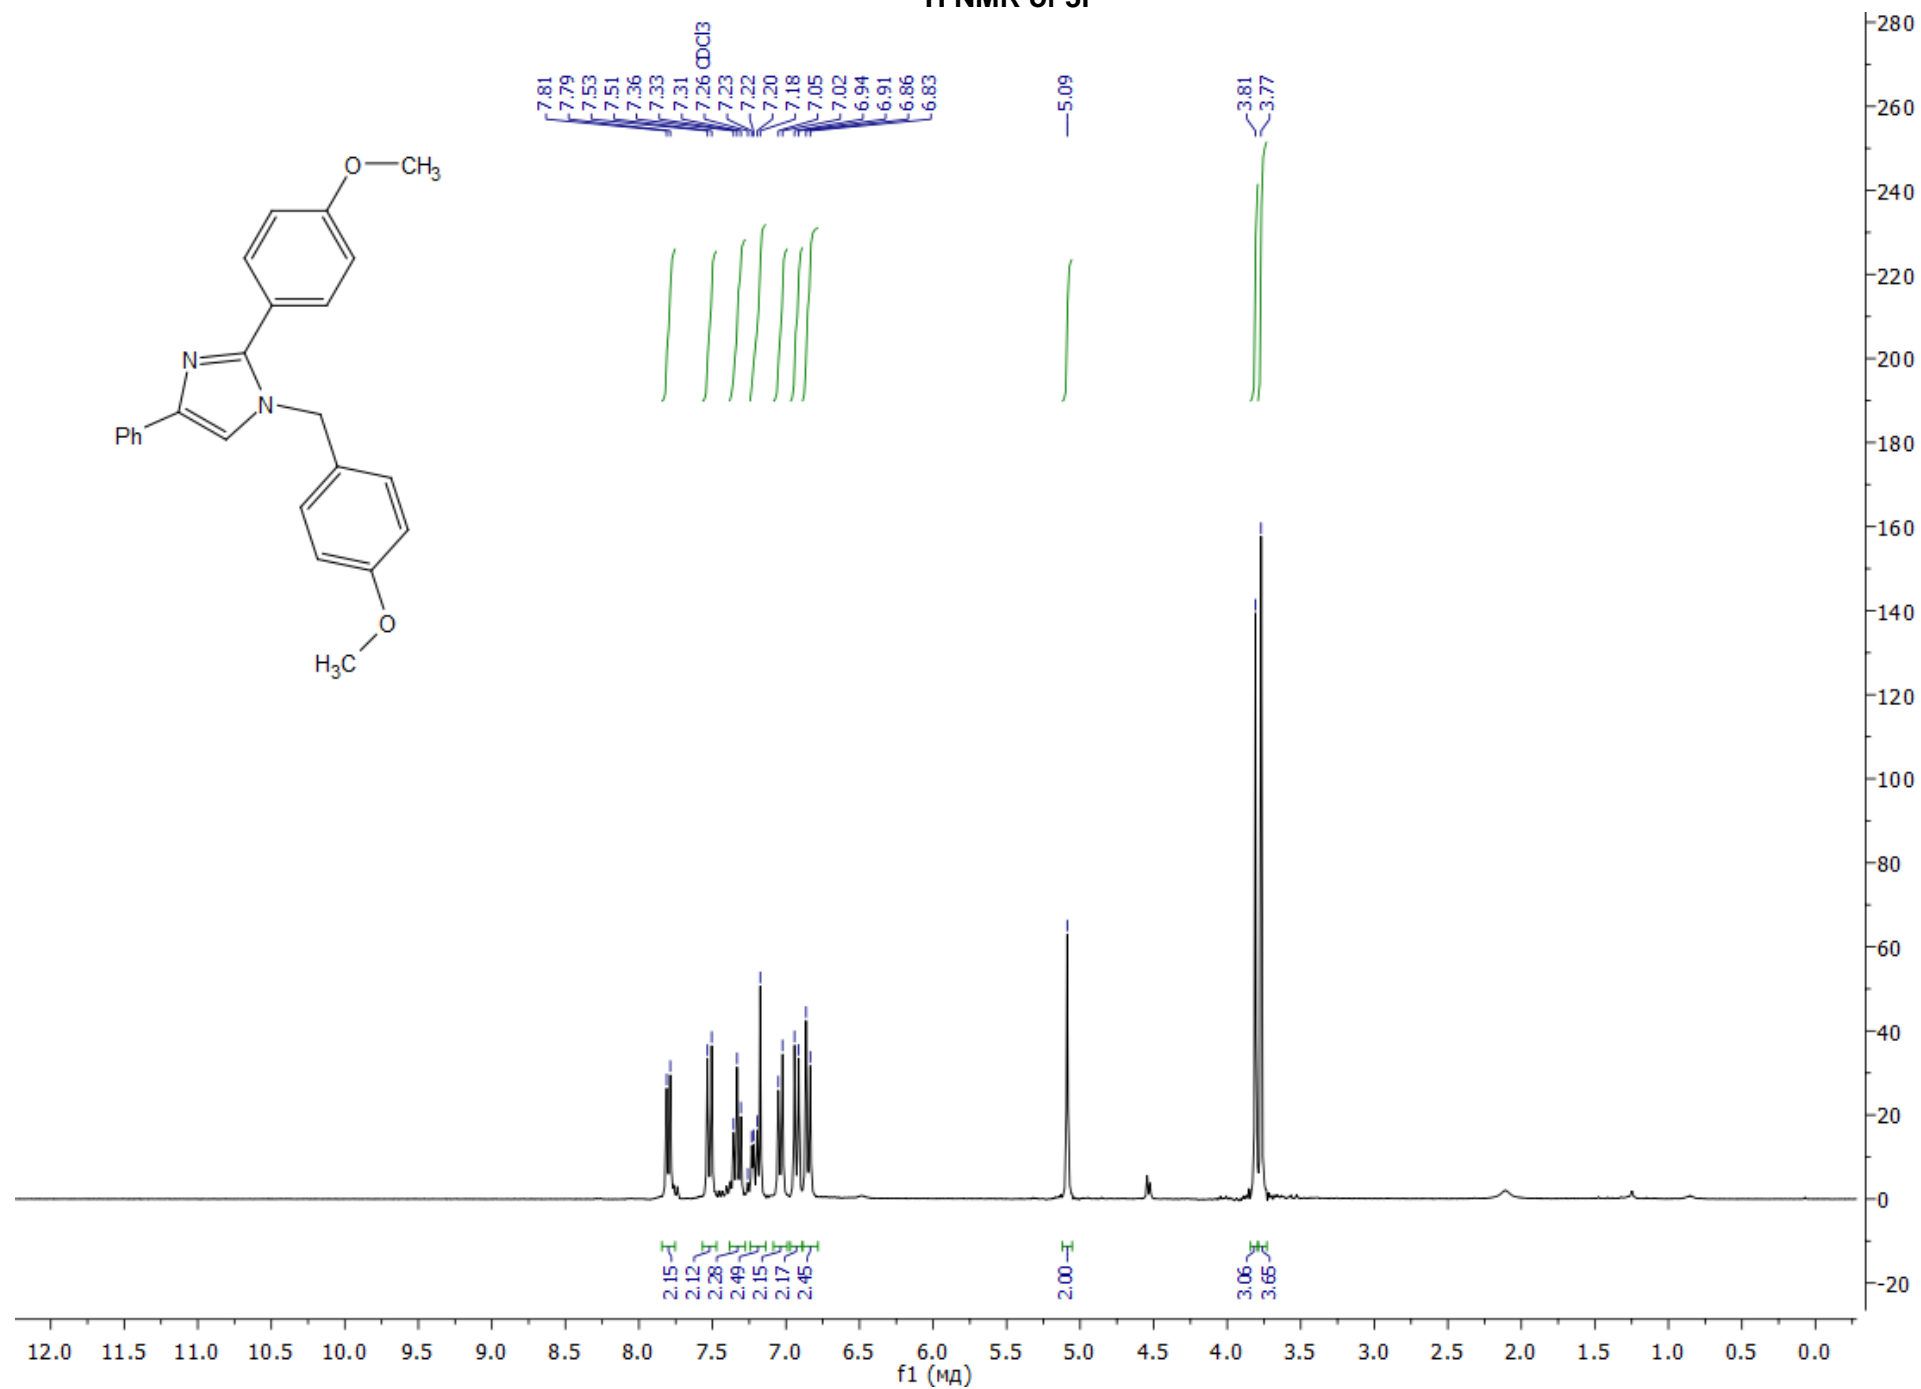

<sup>13</sup>C NMR of 3I

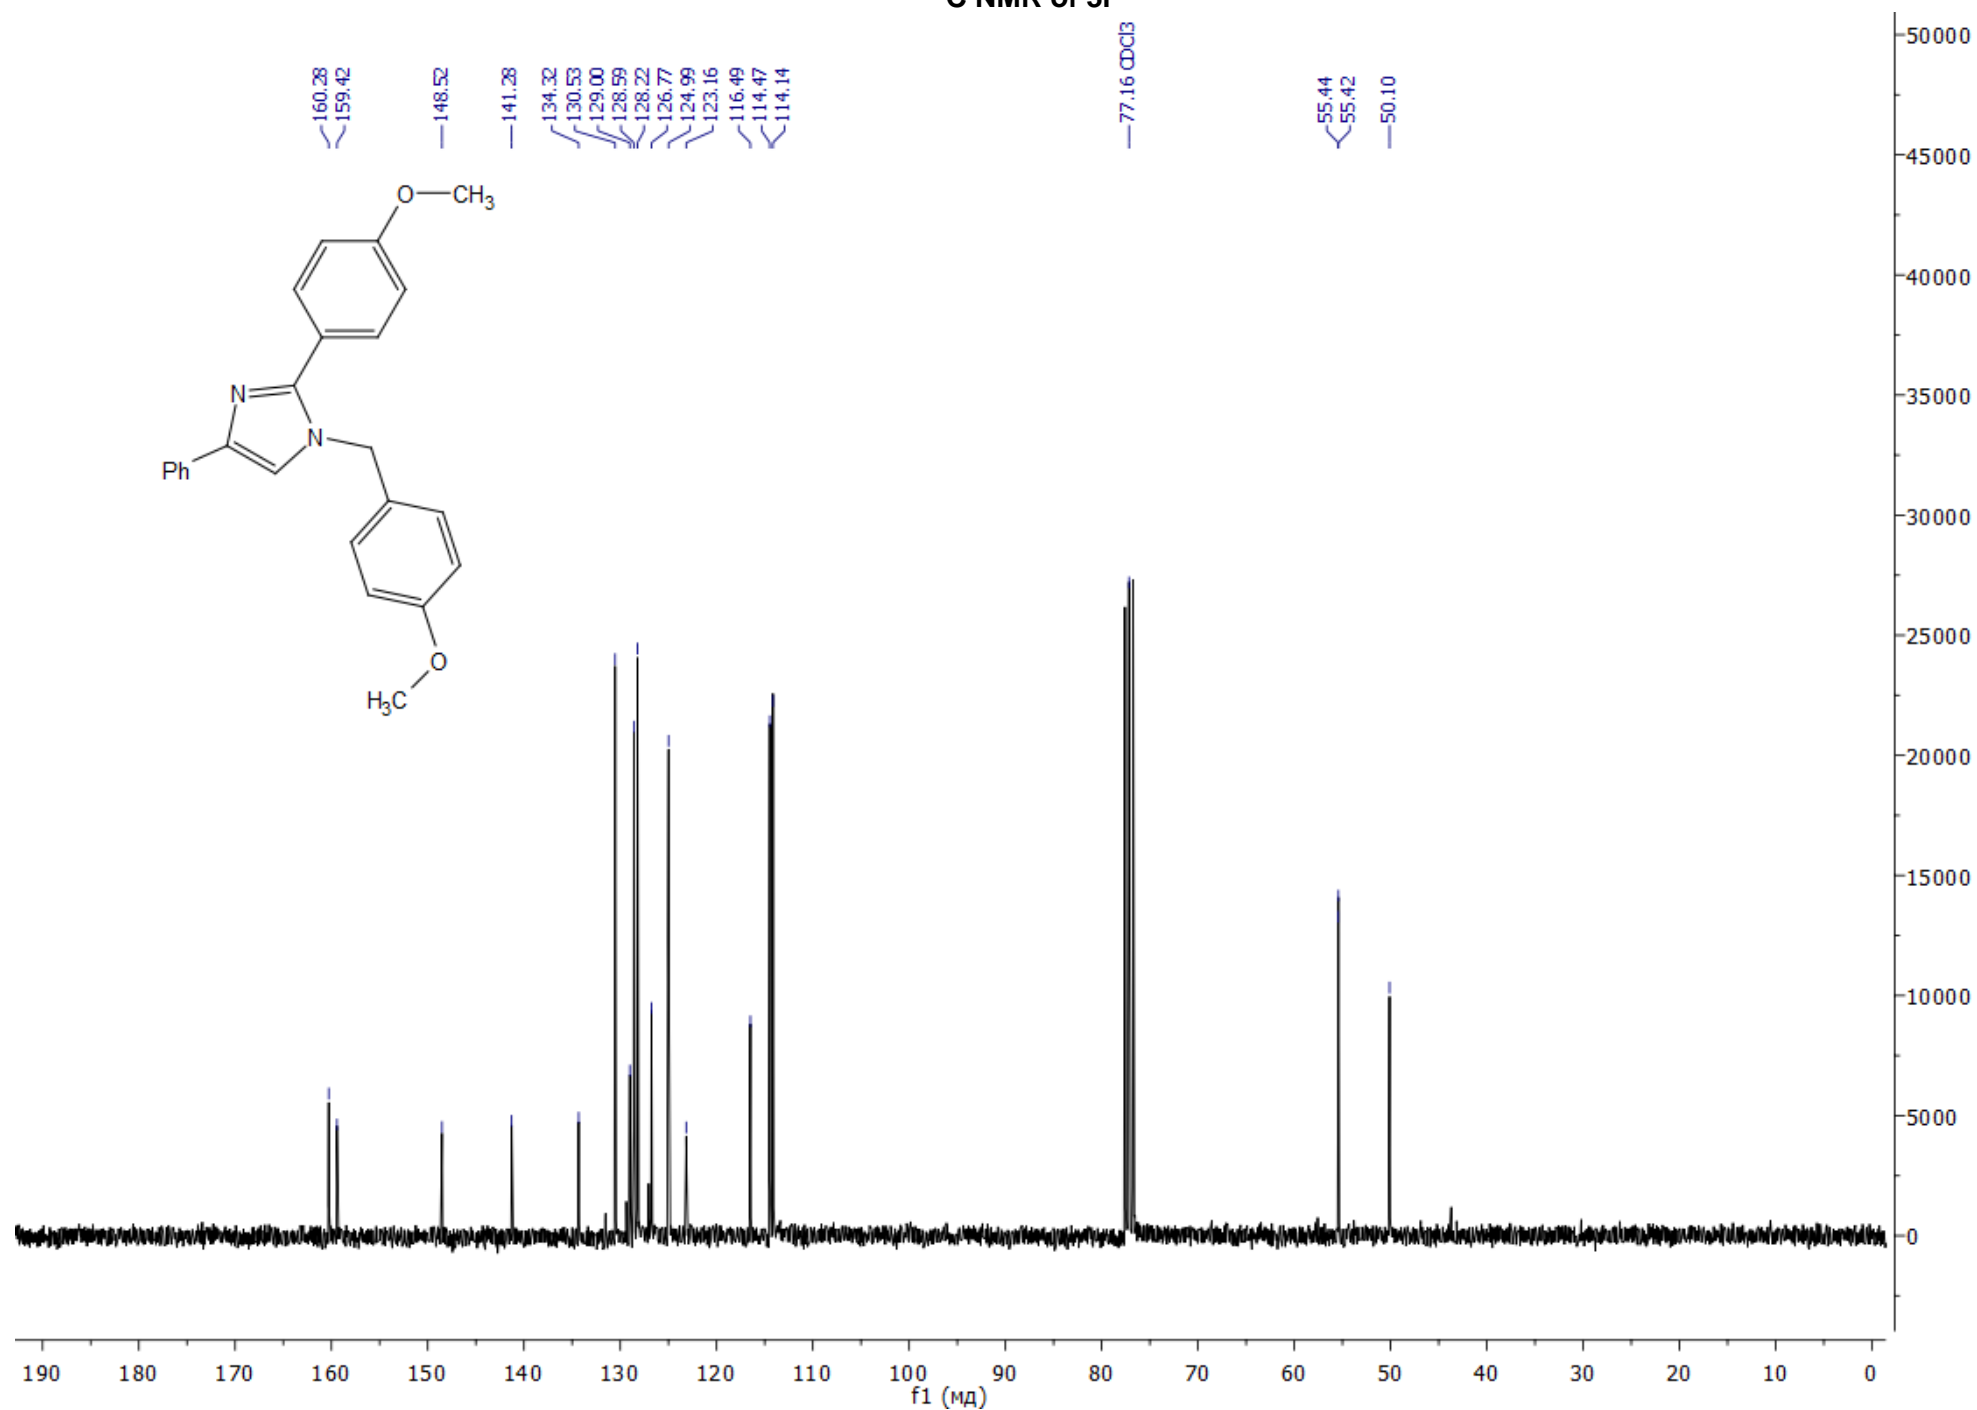



<sup>1</sup>H NMR of 3m

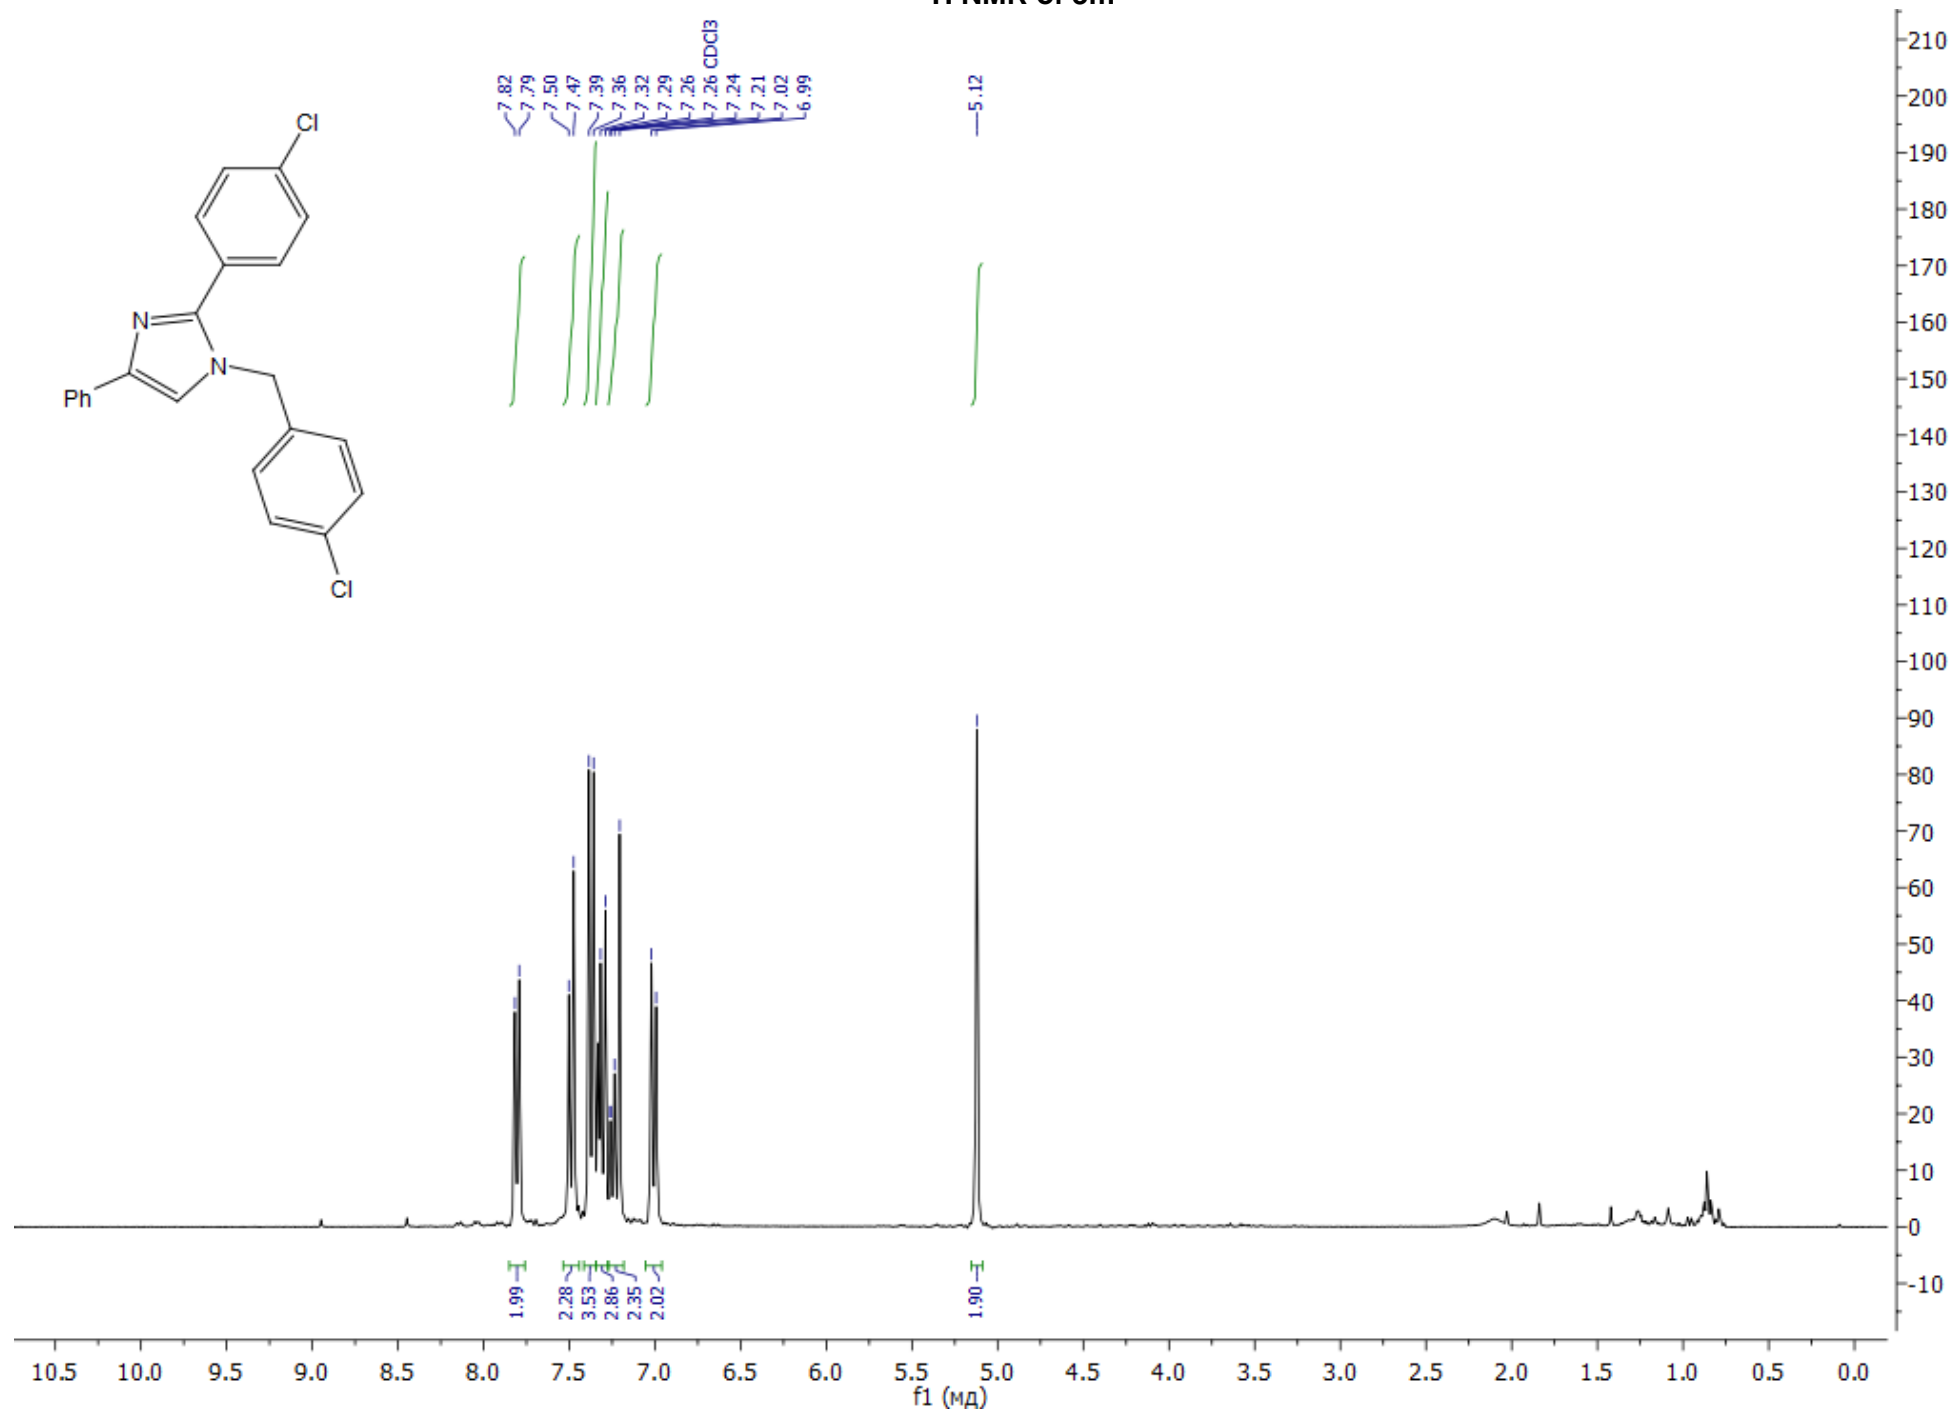

<sup>13</sup>C NMR of 3m

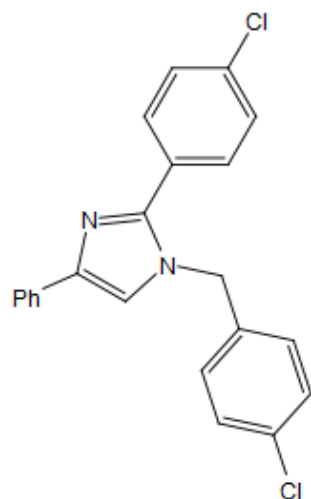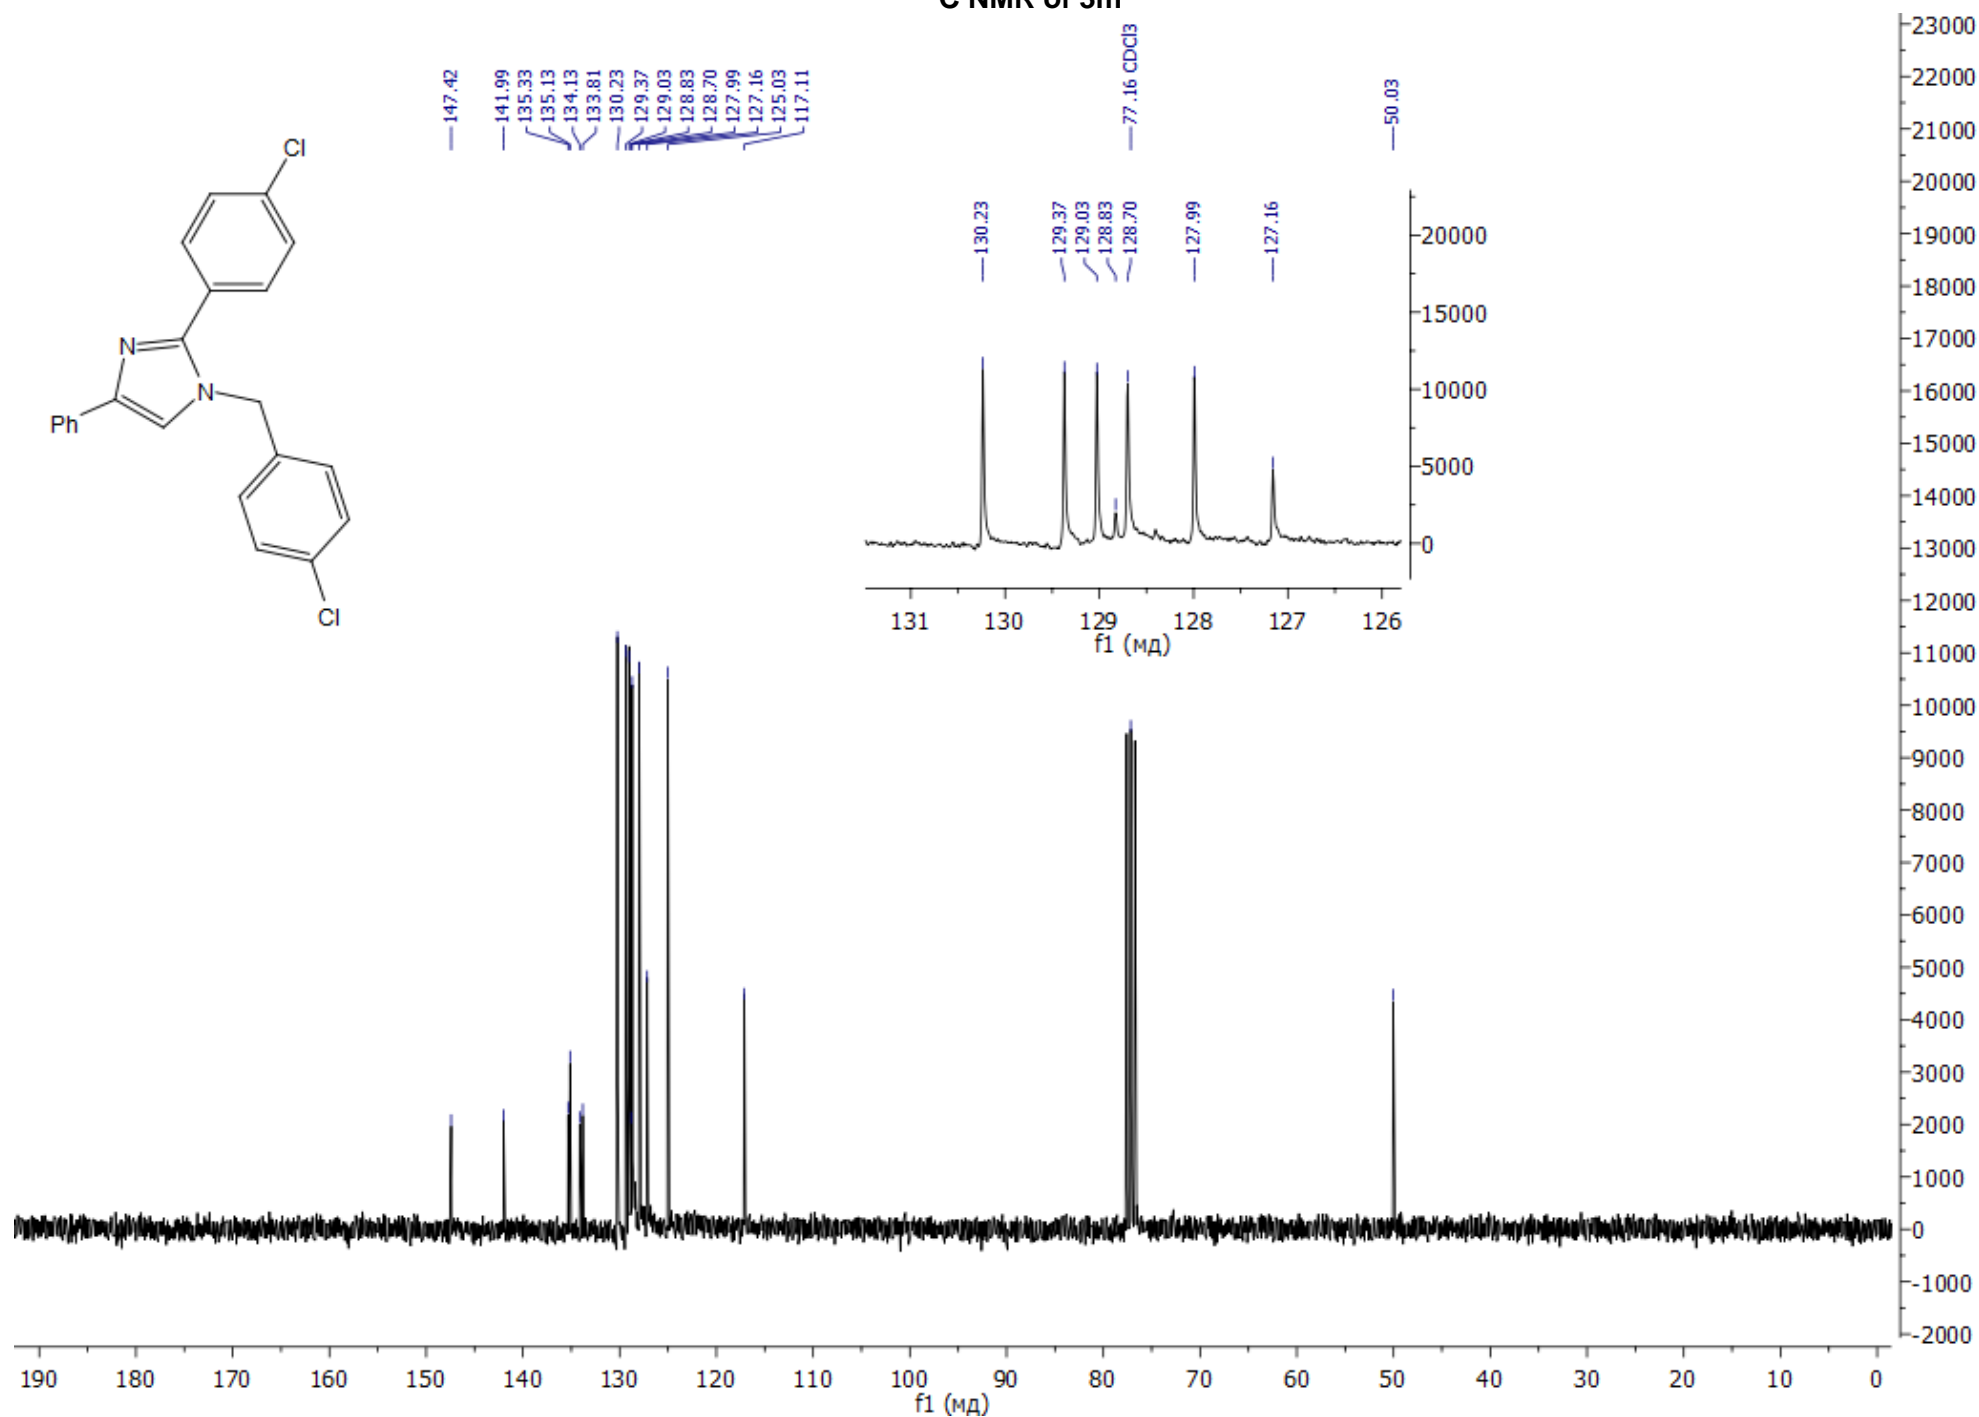

<sup>1</sup>H NMR of 3n

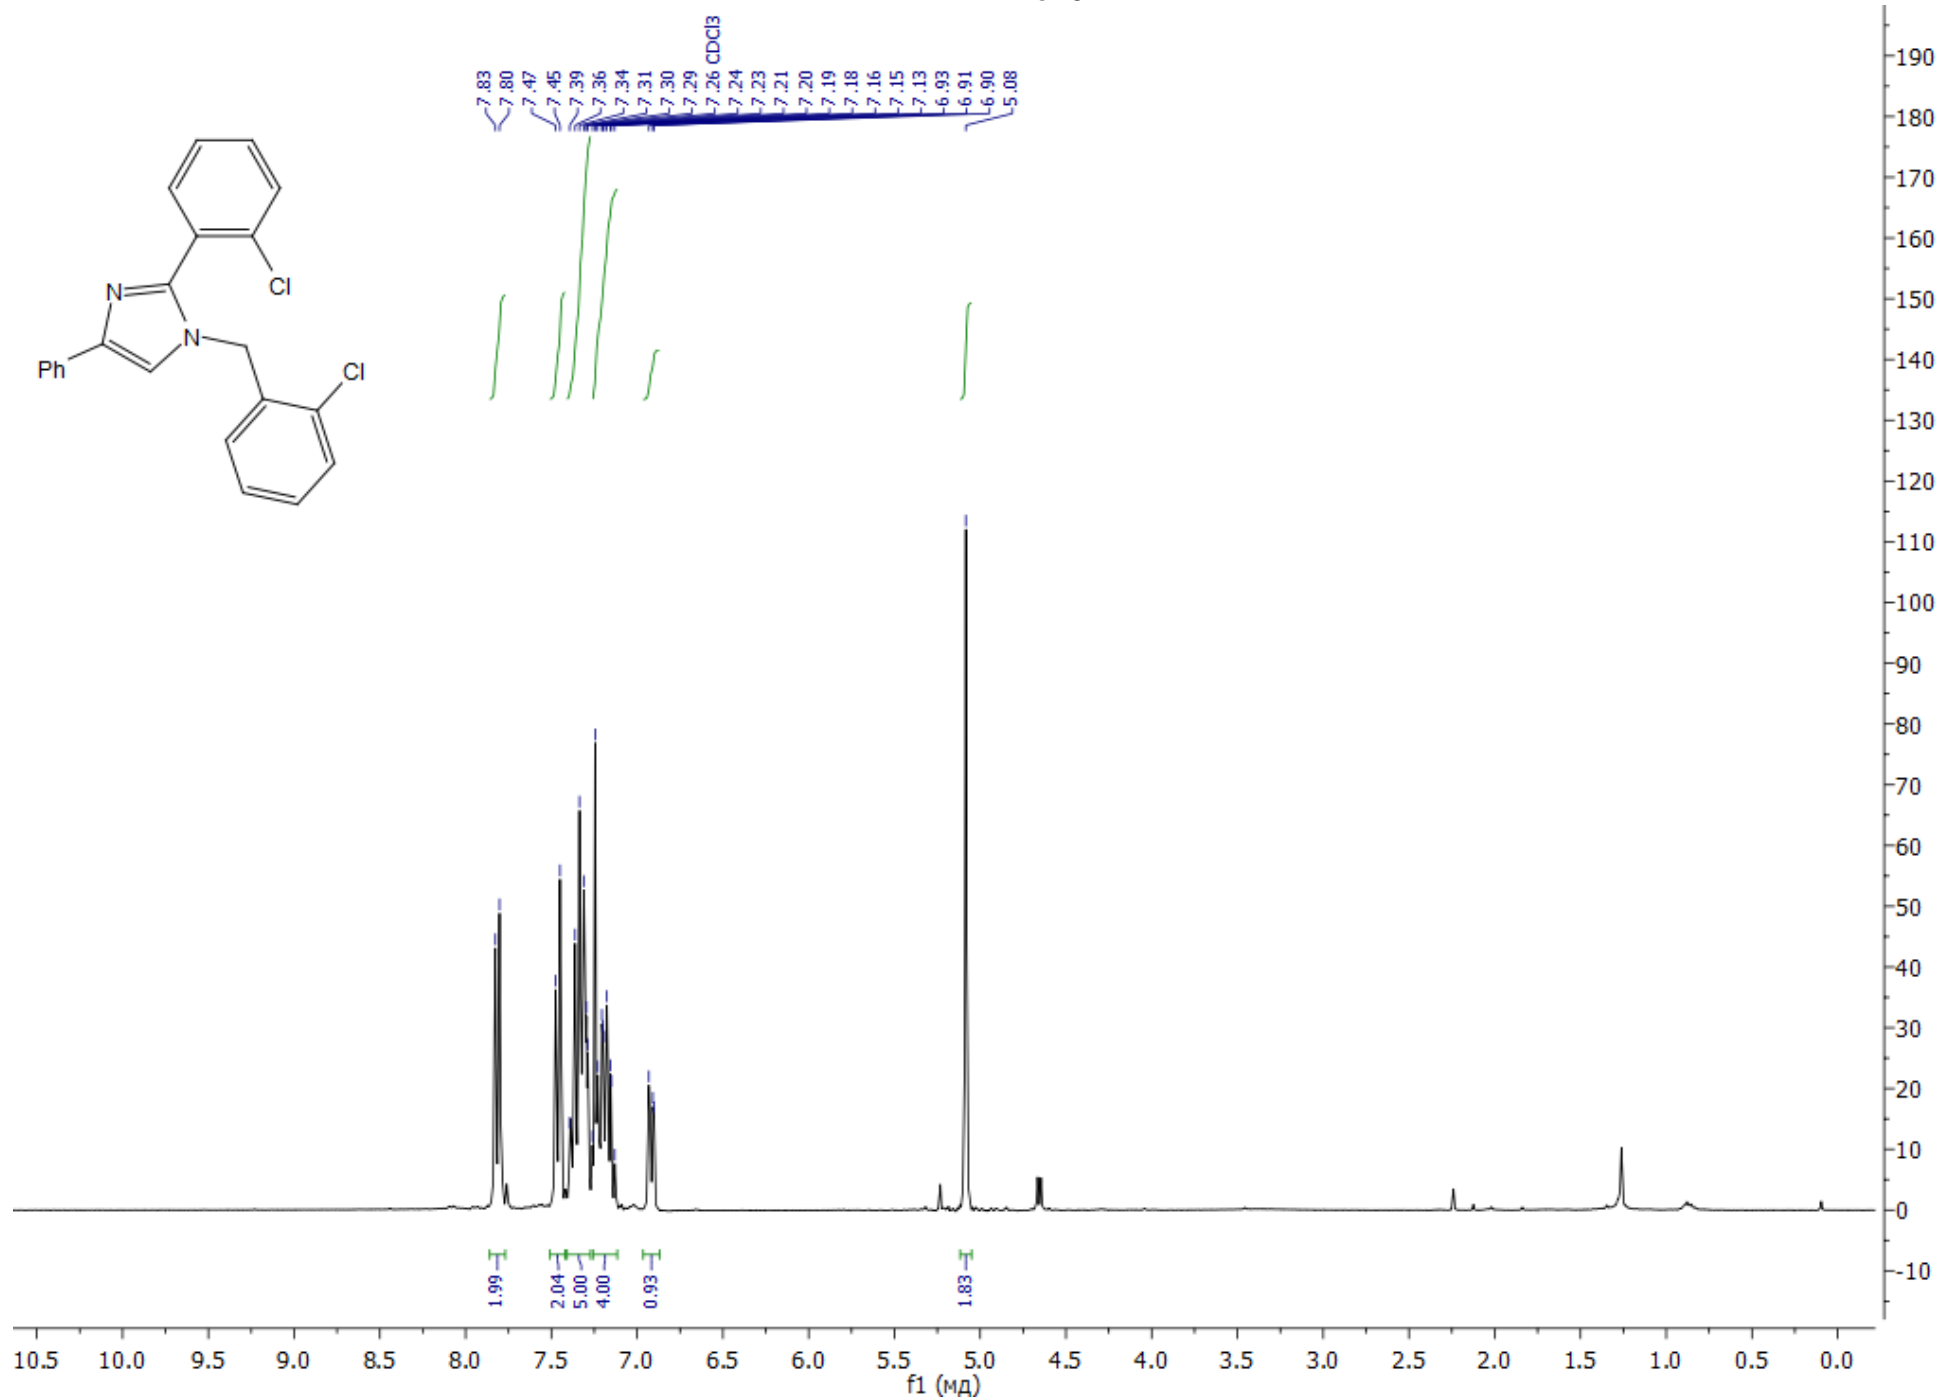

**$^{13}\text{C}$  NMR of 3n**

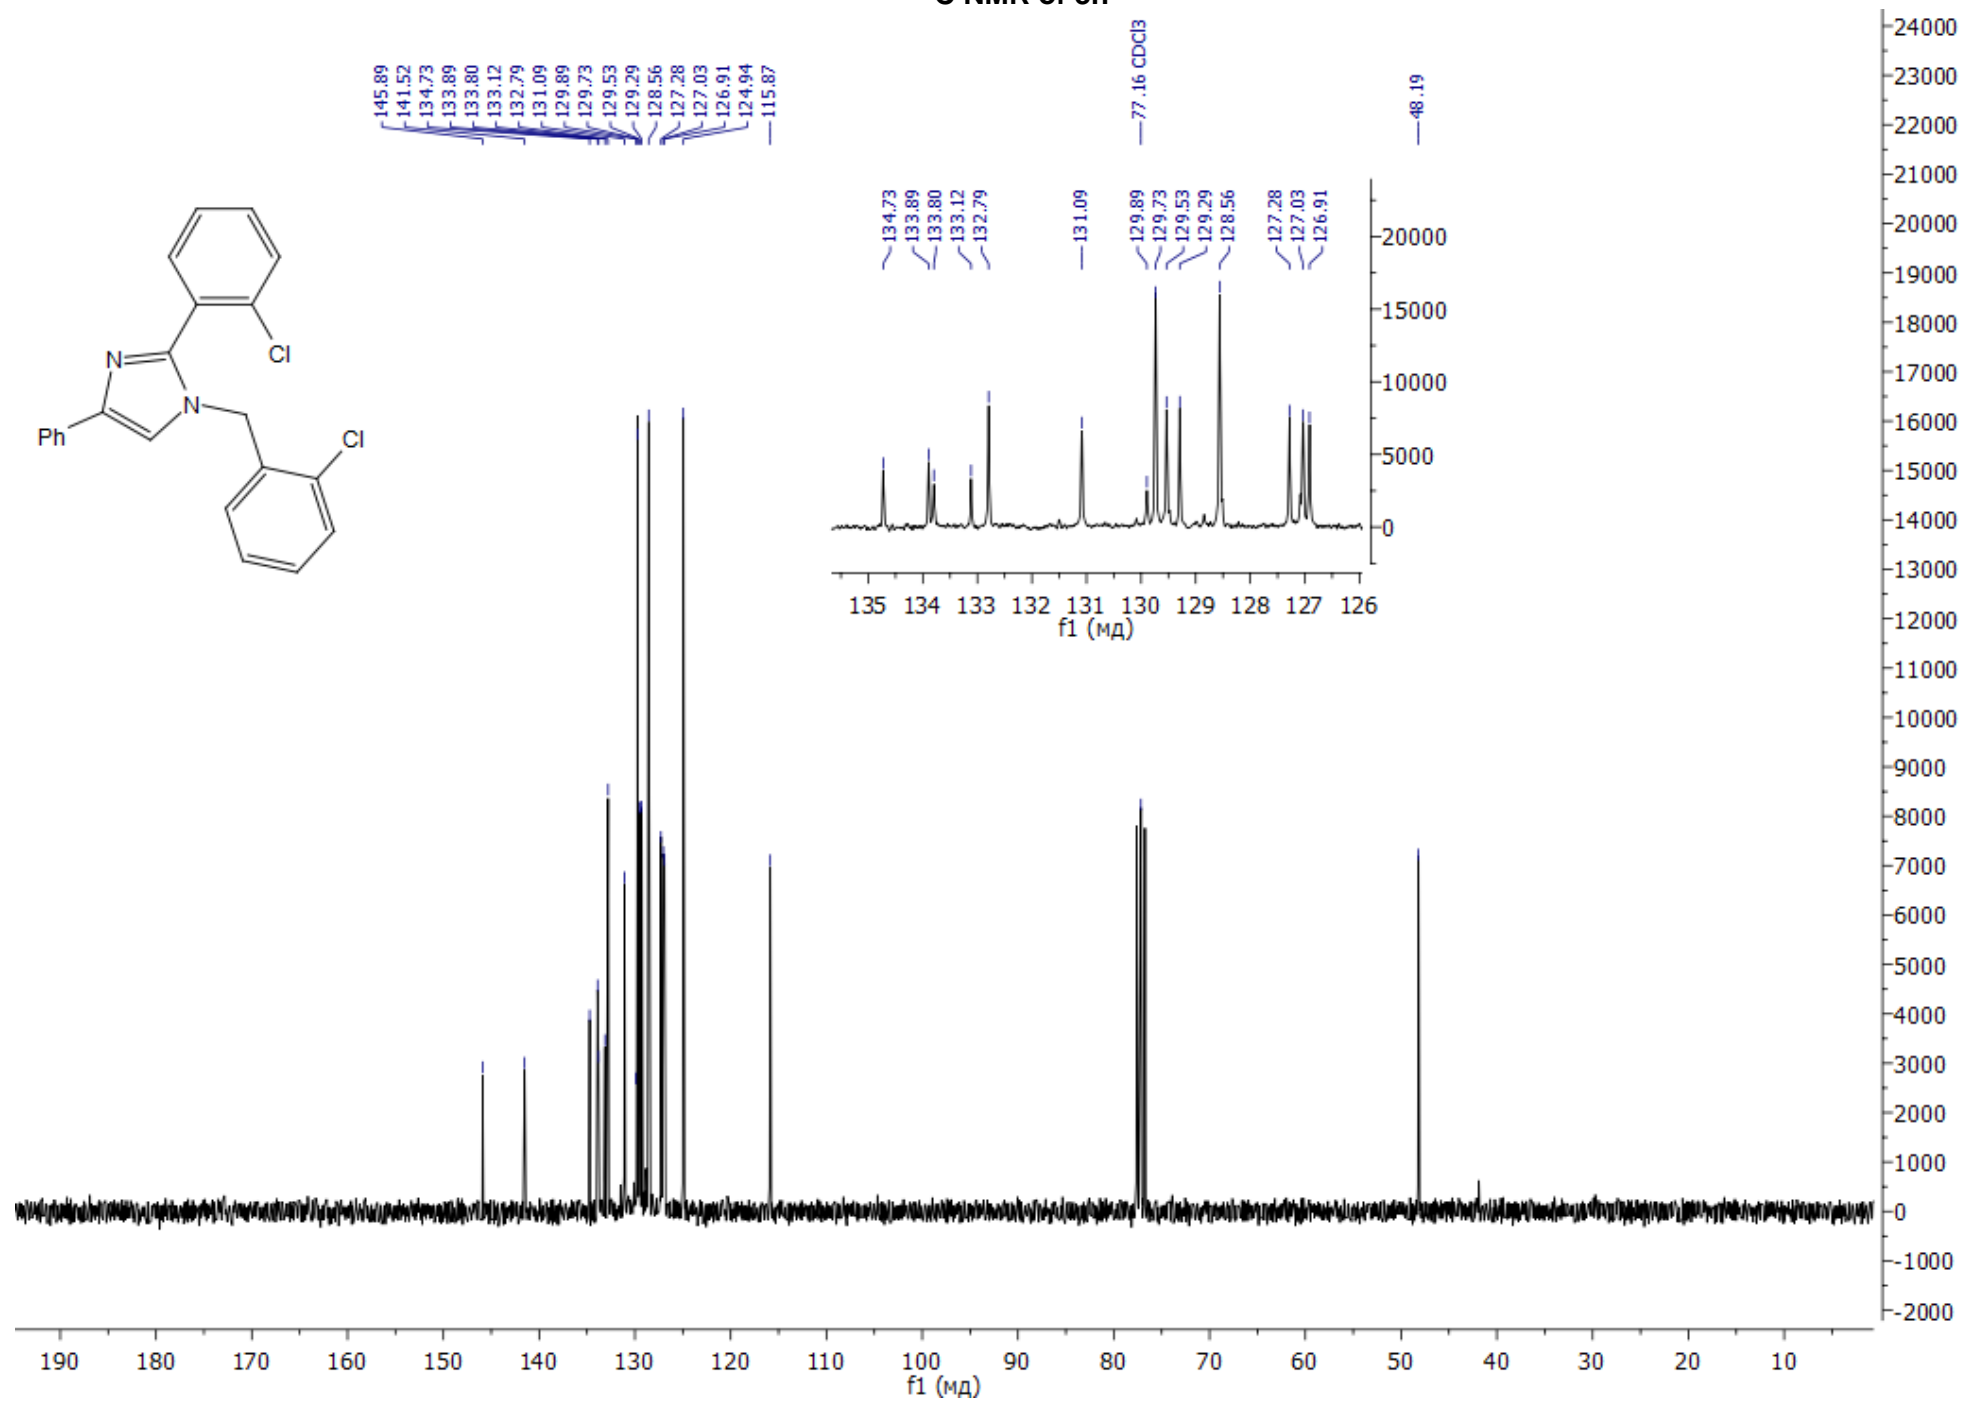

<sup>1</sup>H NMR of 3o

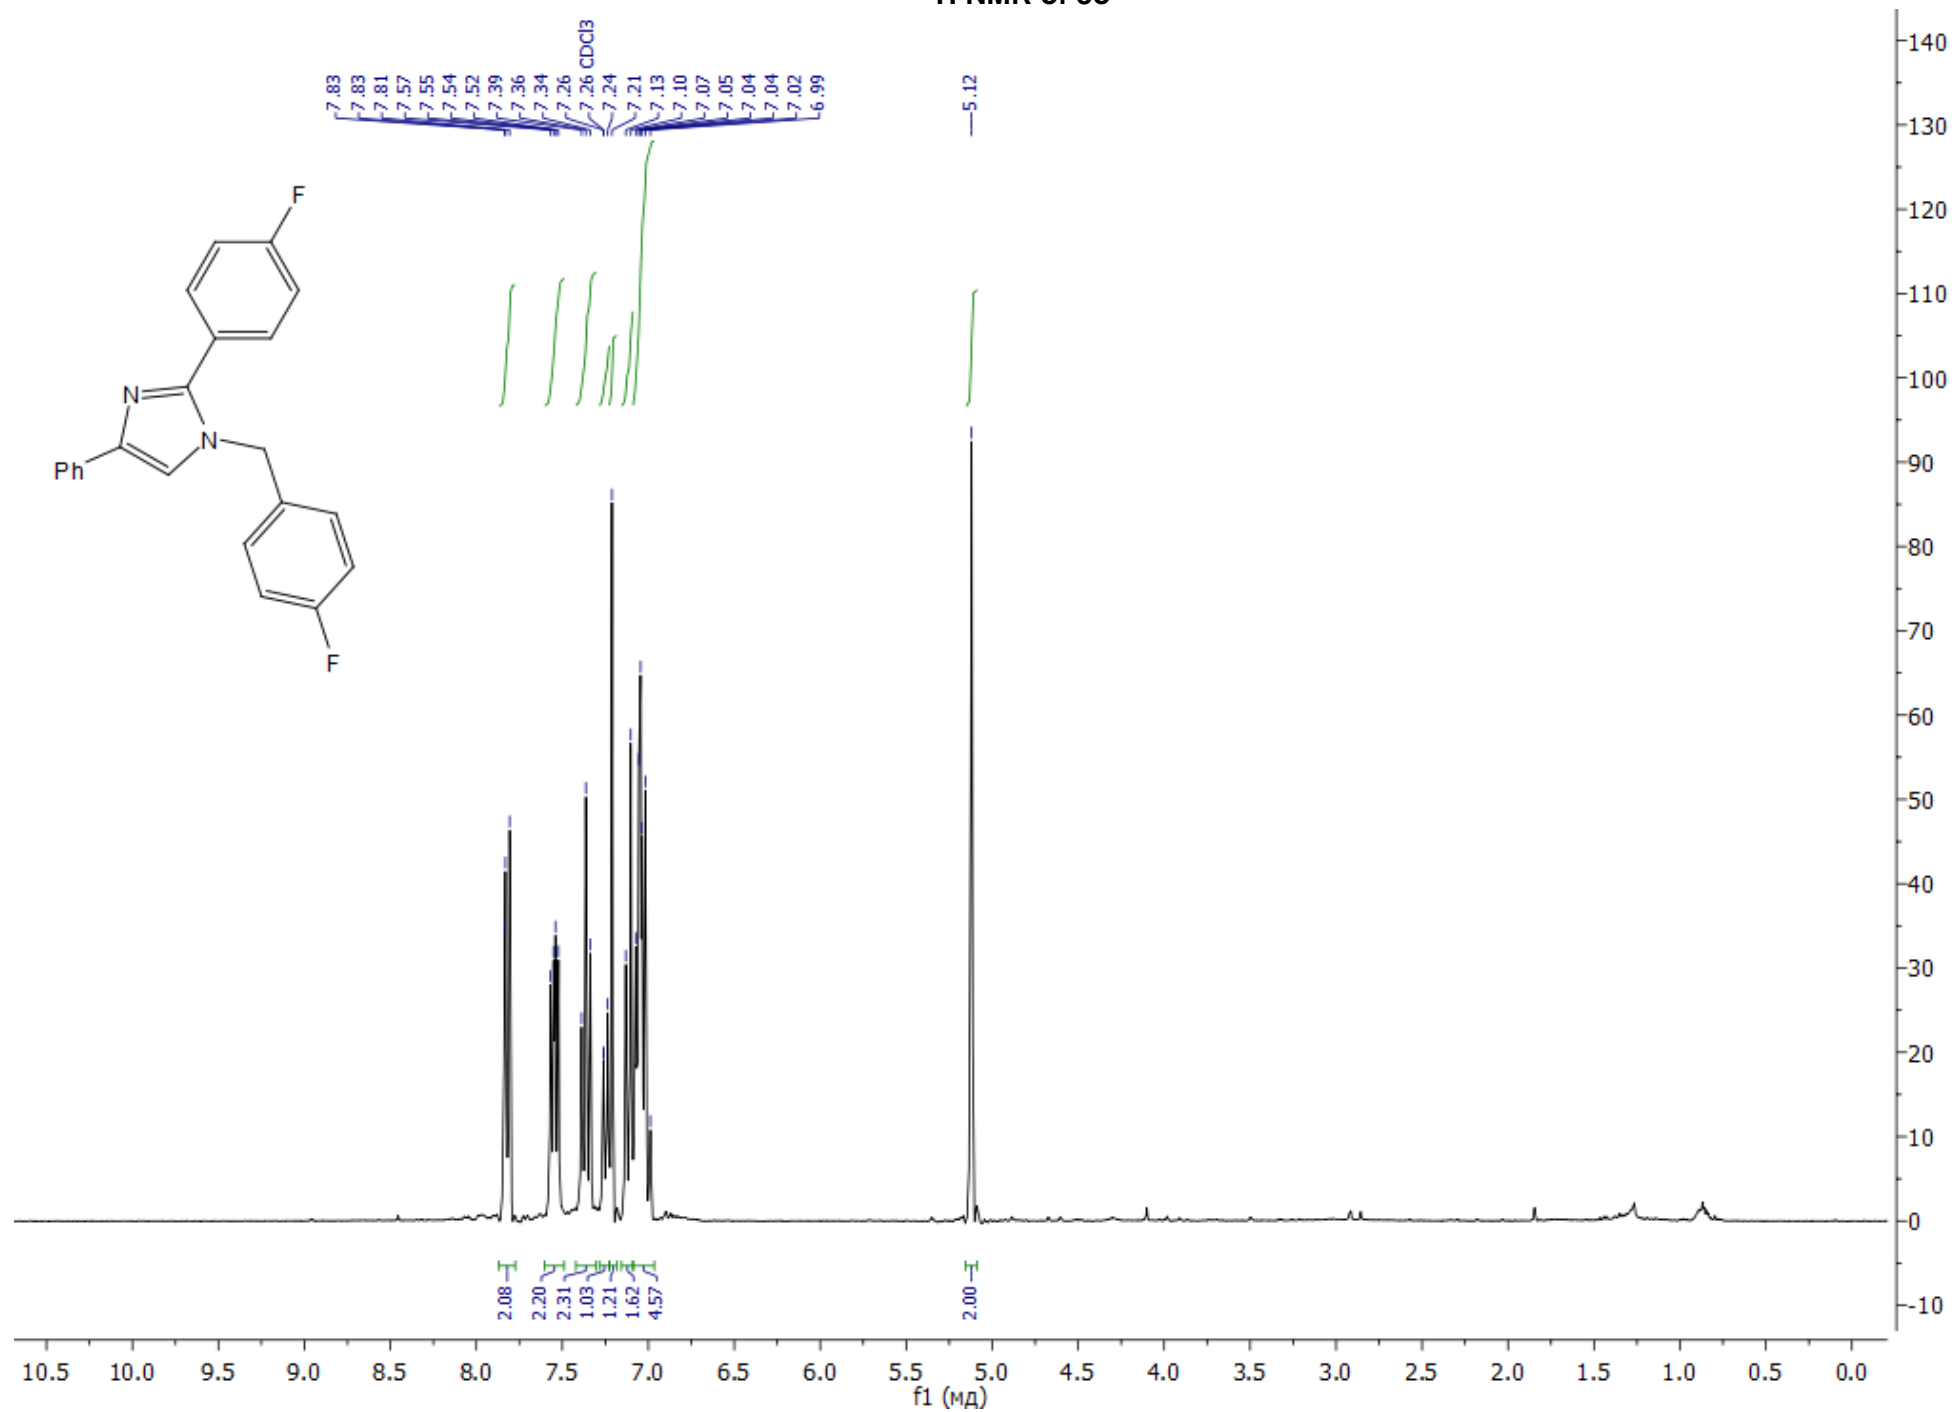

<sup>13</sup>C NMR of 3o

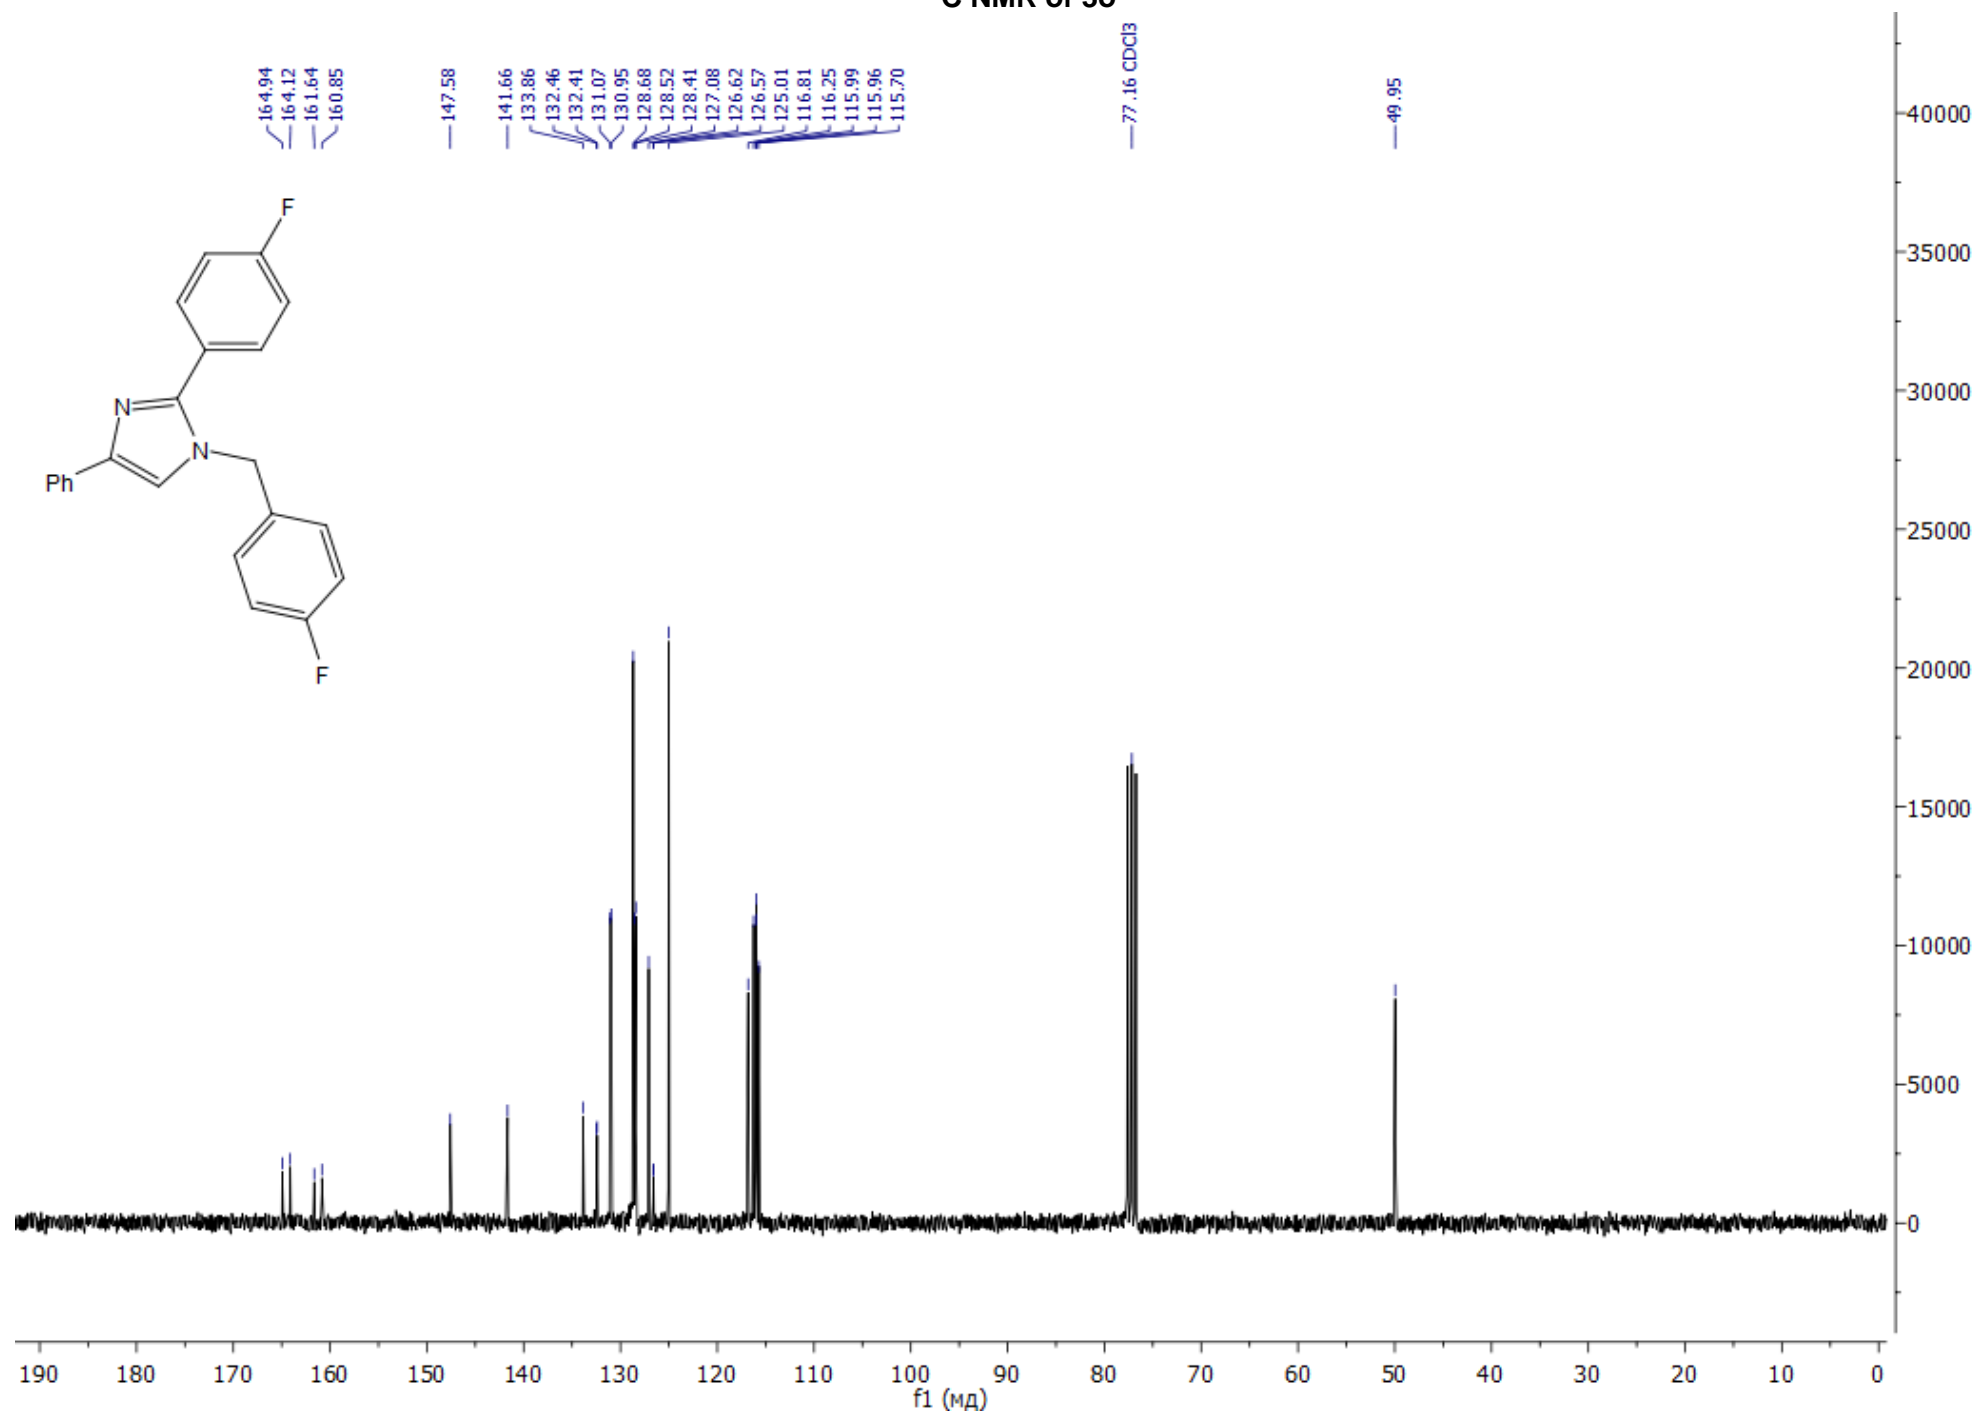

<sup>19</sup>F NMR of 3o

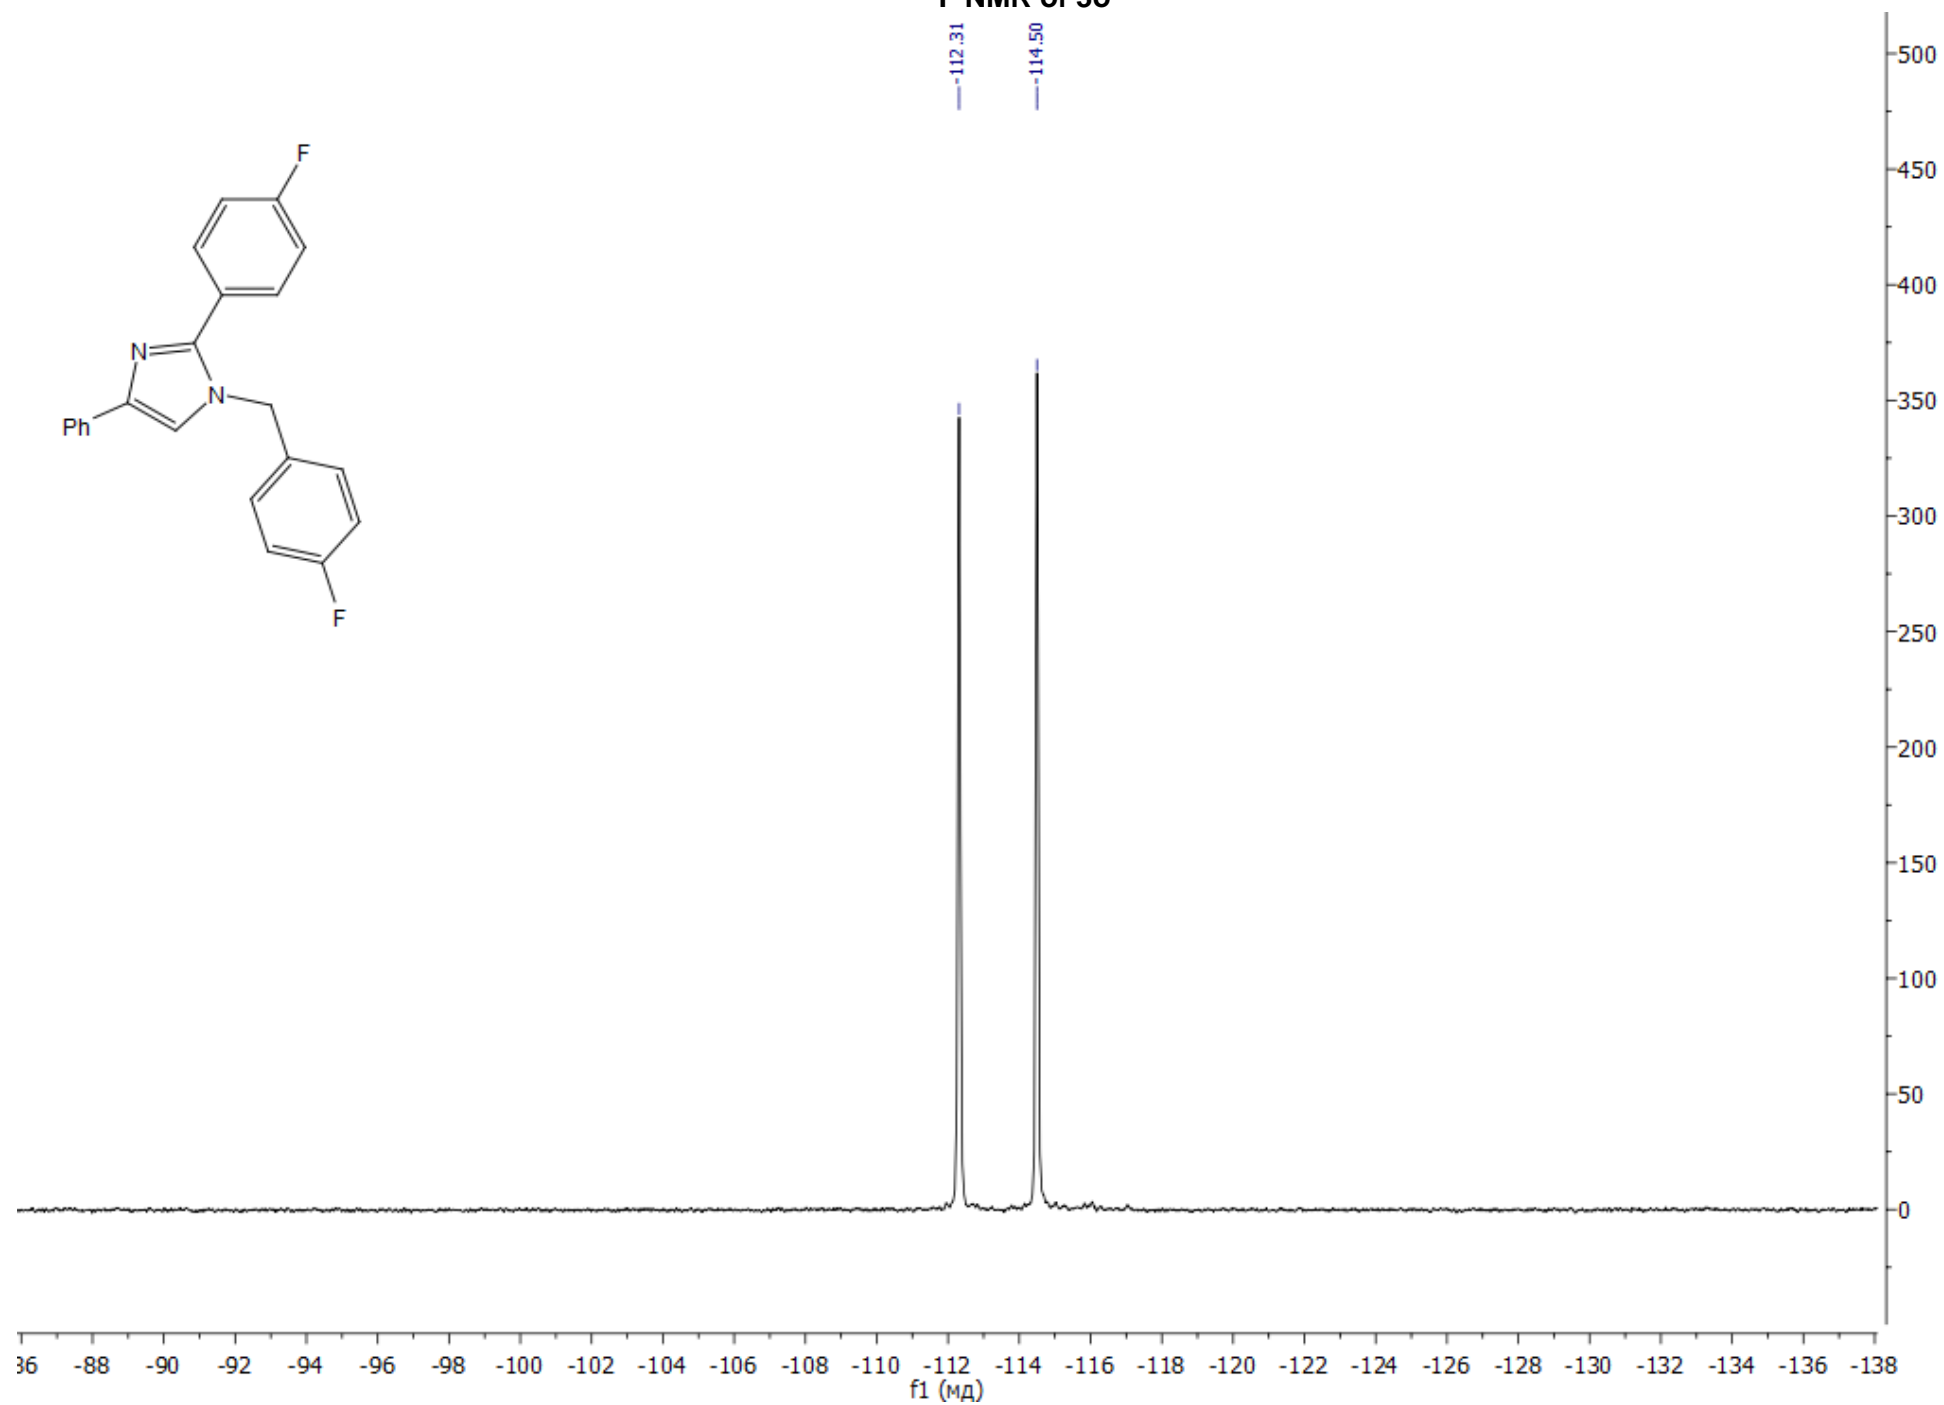

<sup>1</sup>H NMR of 3p

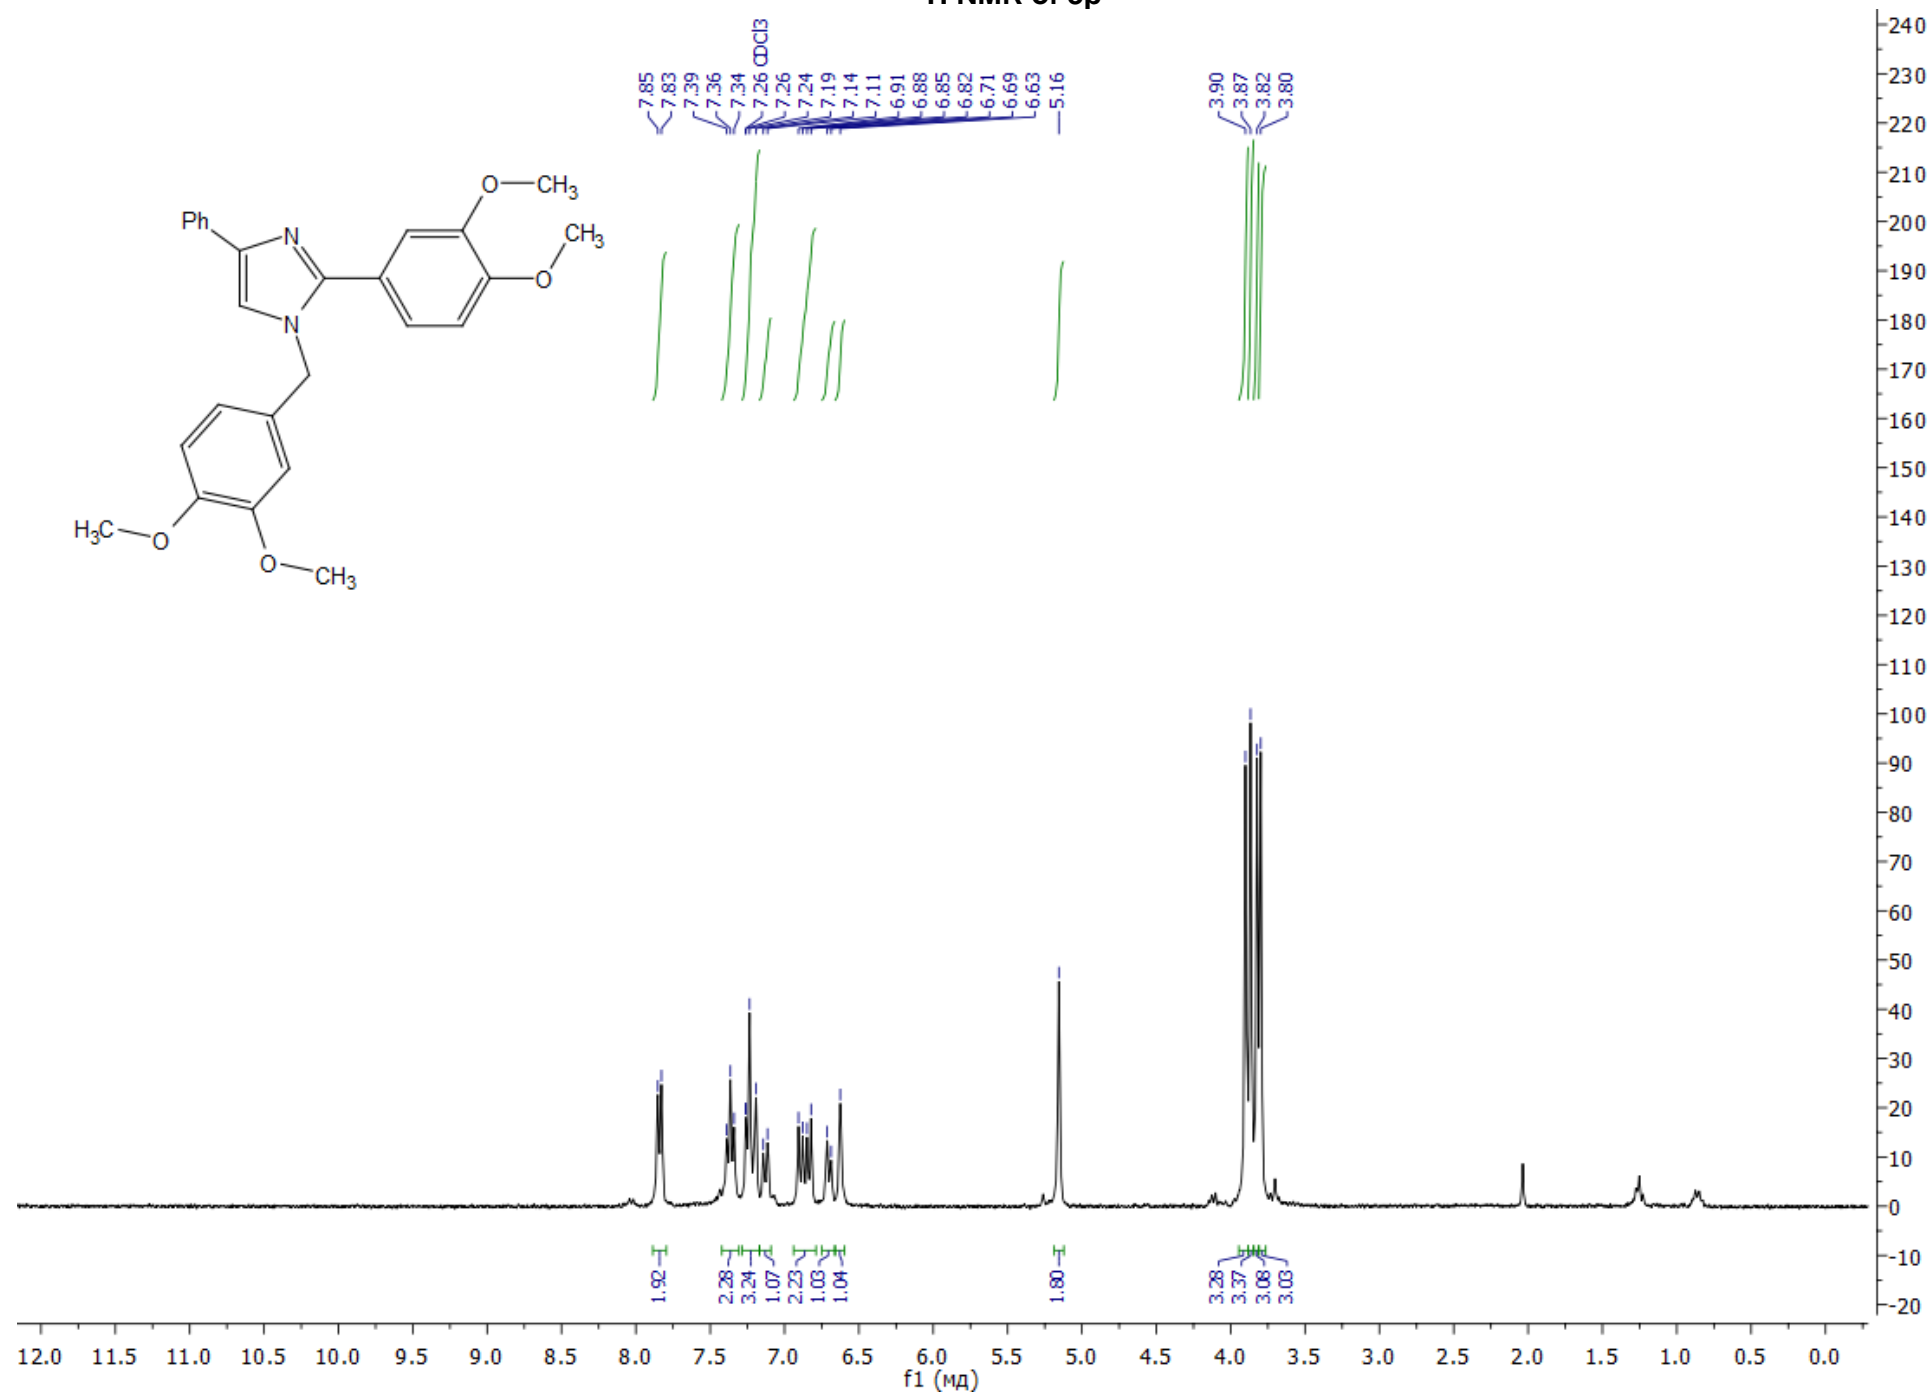



<sup>13</sup>C NMR of 3p

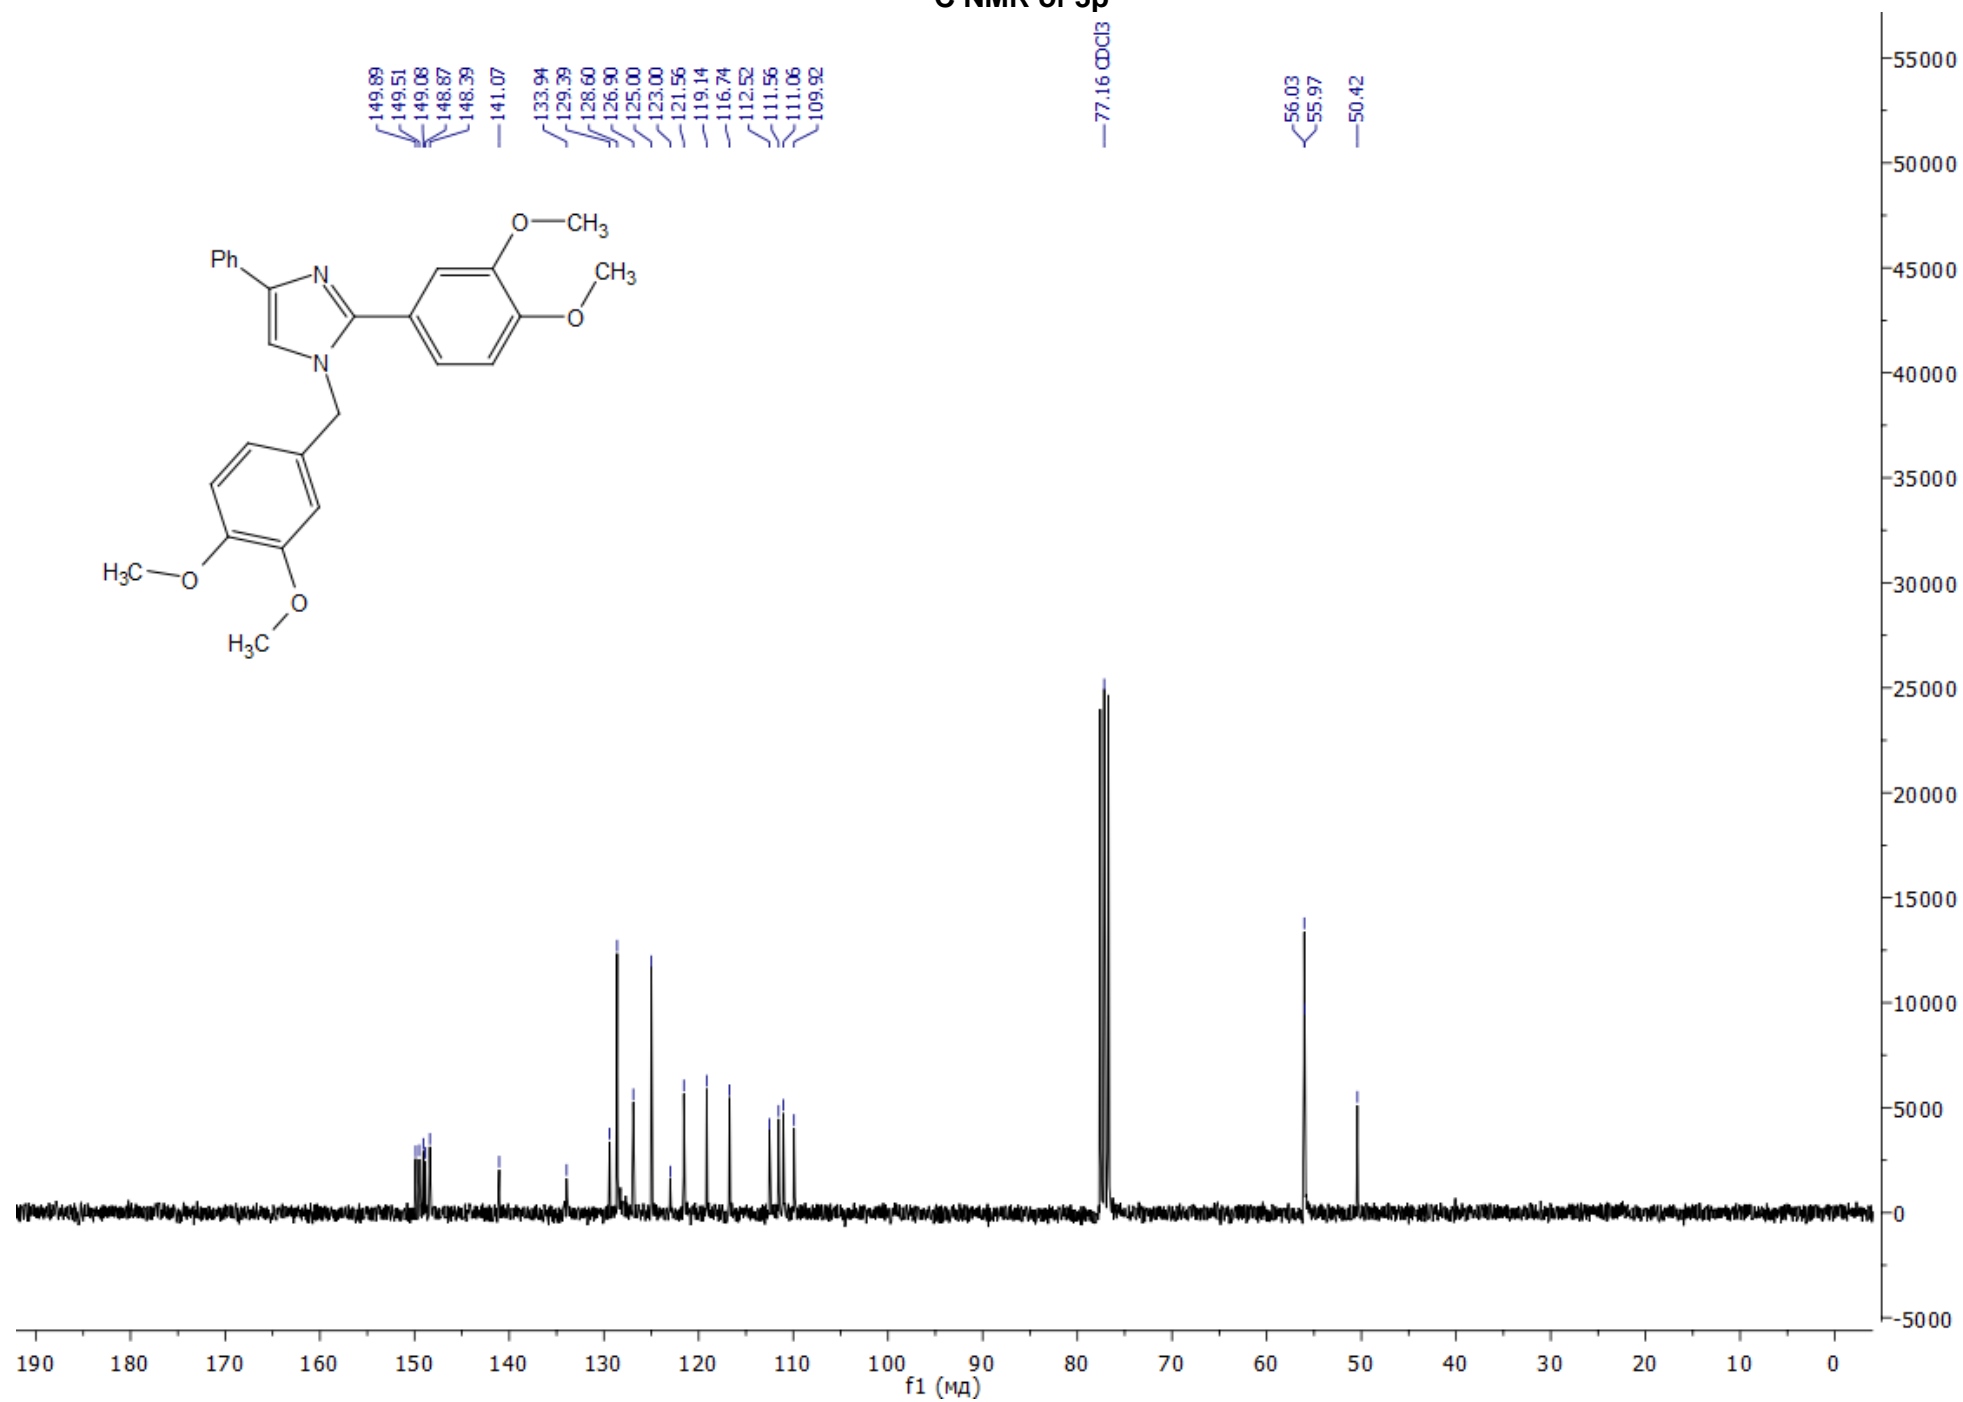

<sup>1</sup>H NMR of 3q

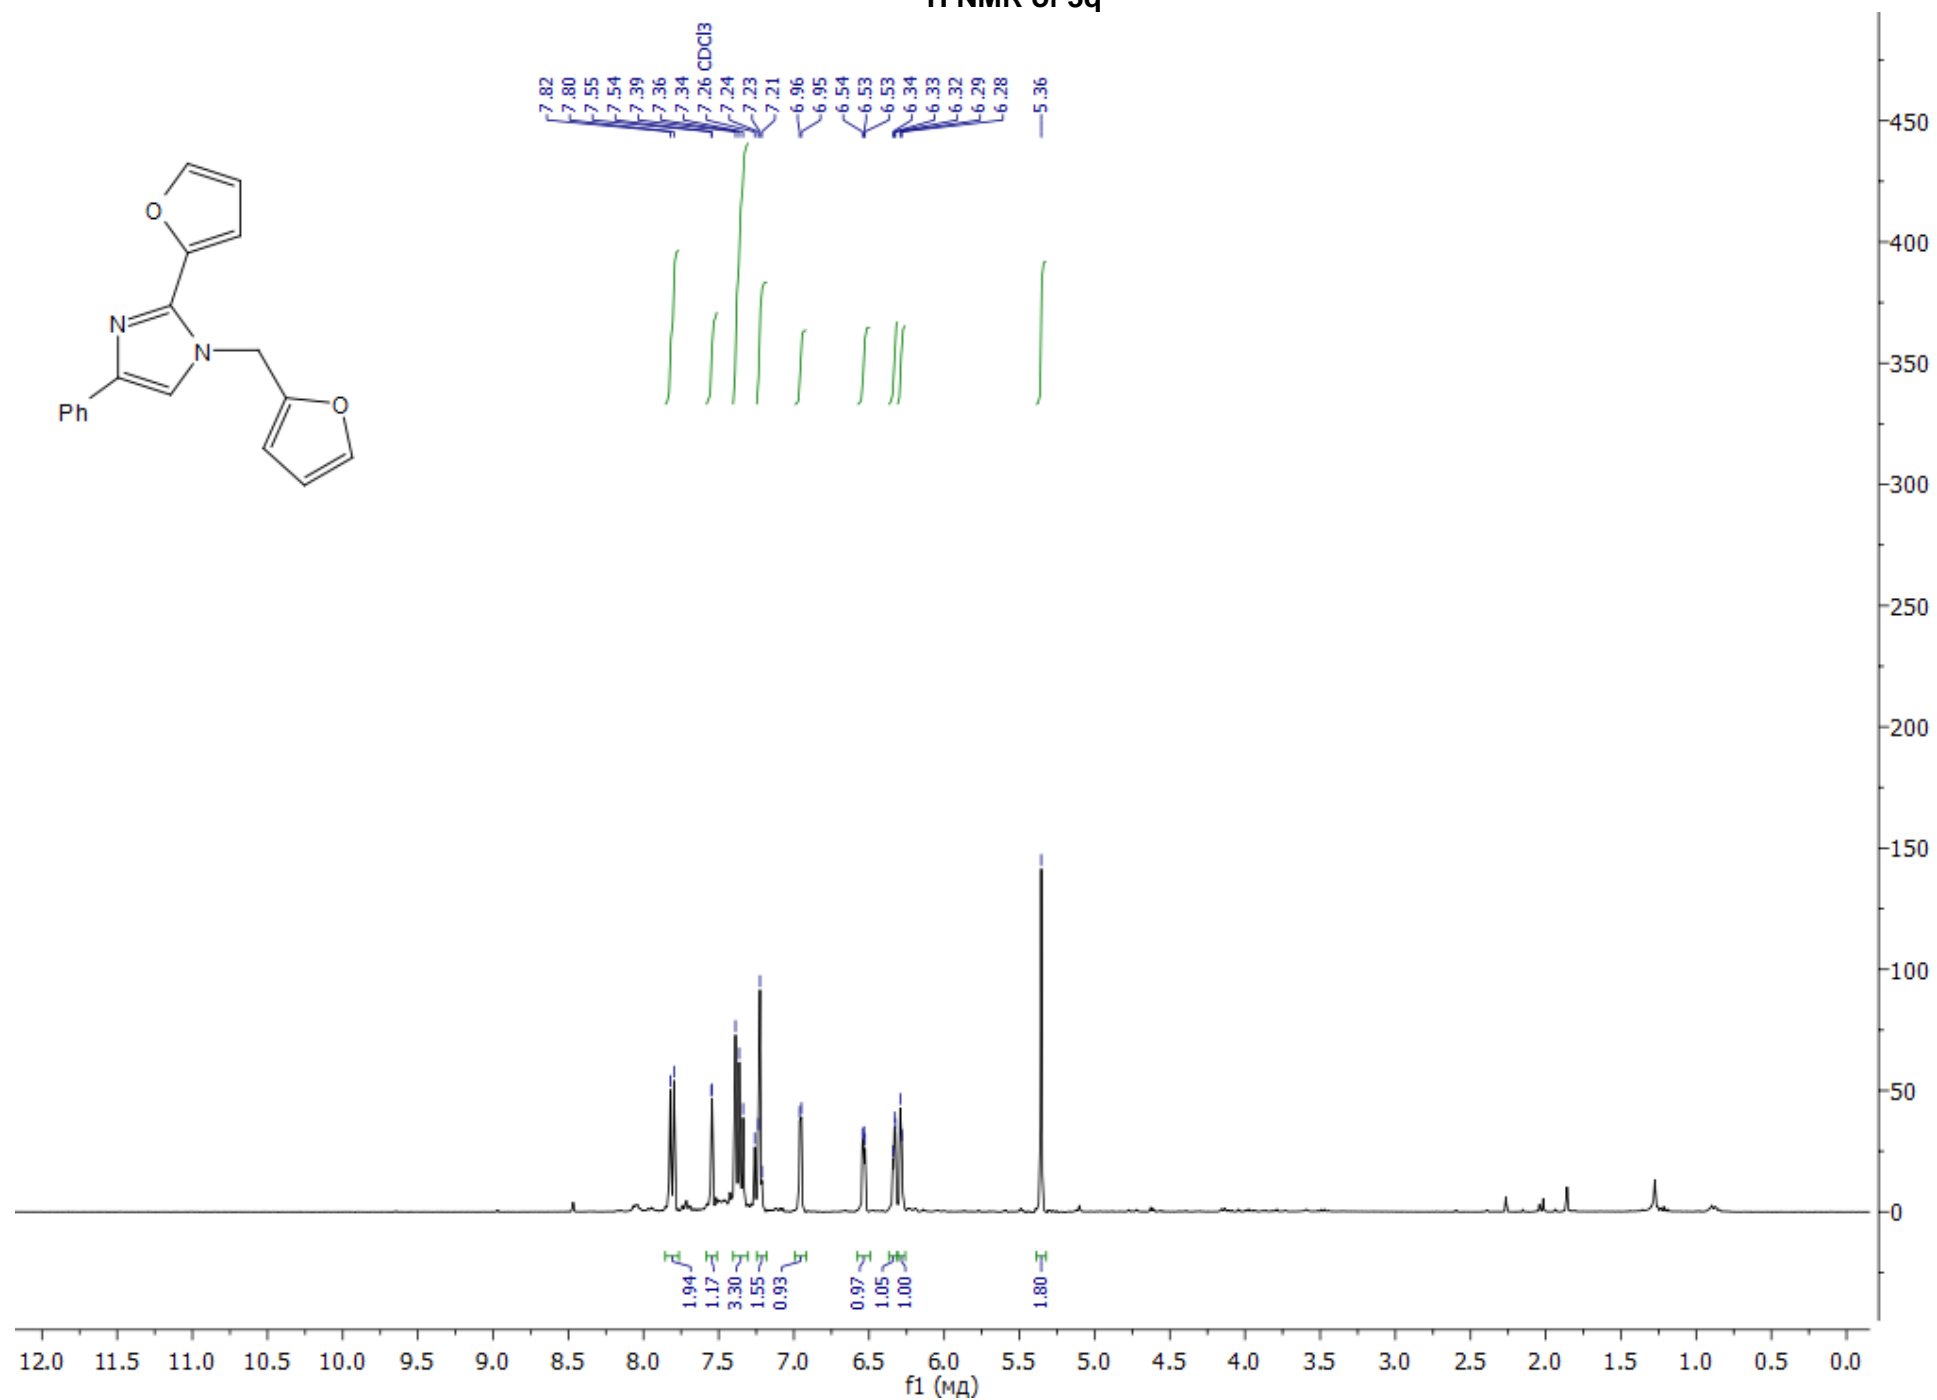

—77.16 CDCl<sub>3</sub>

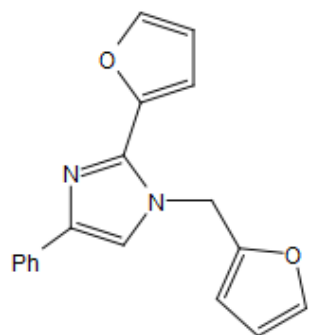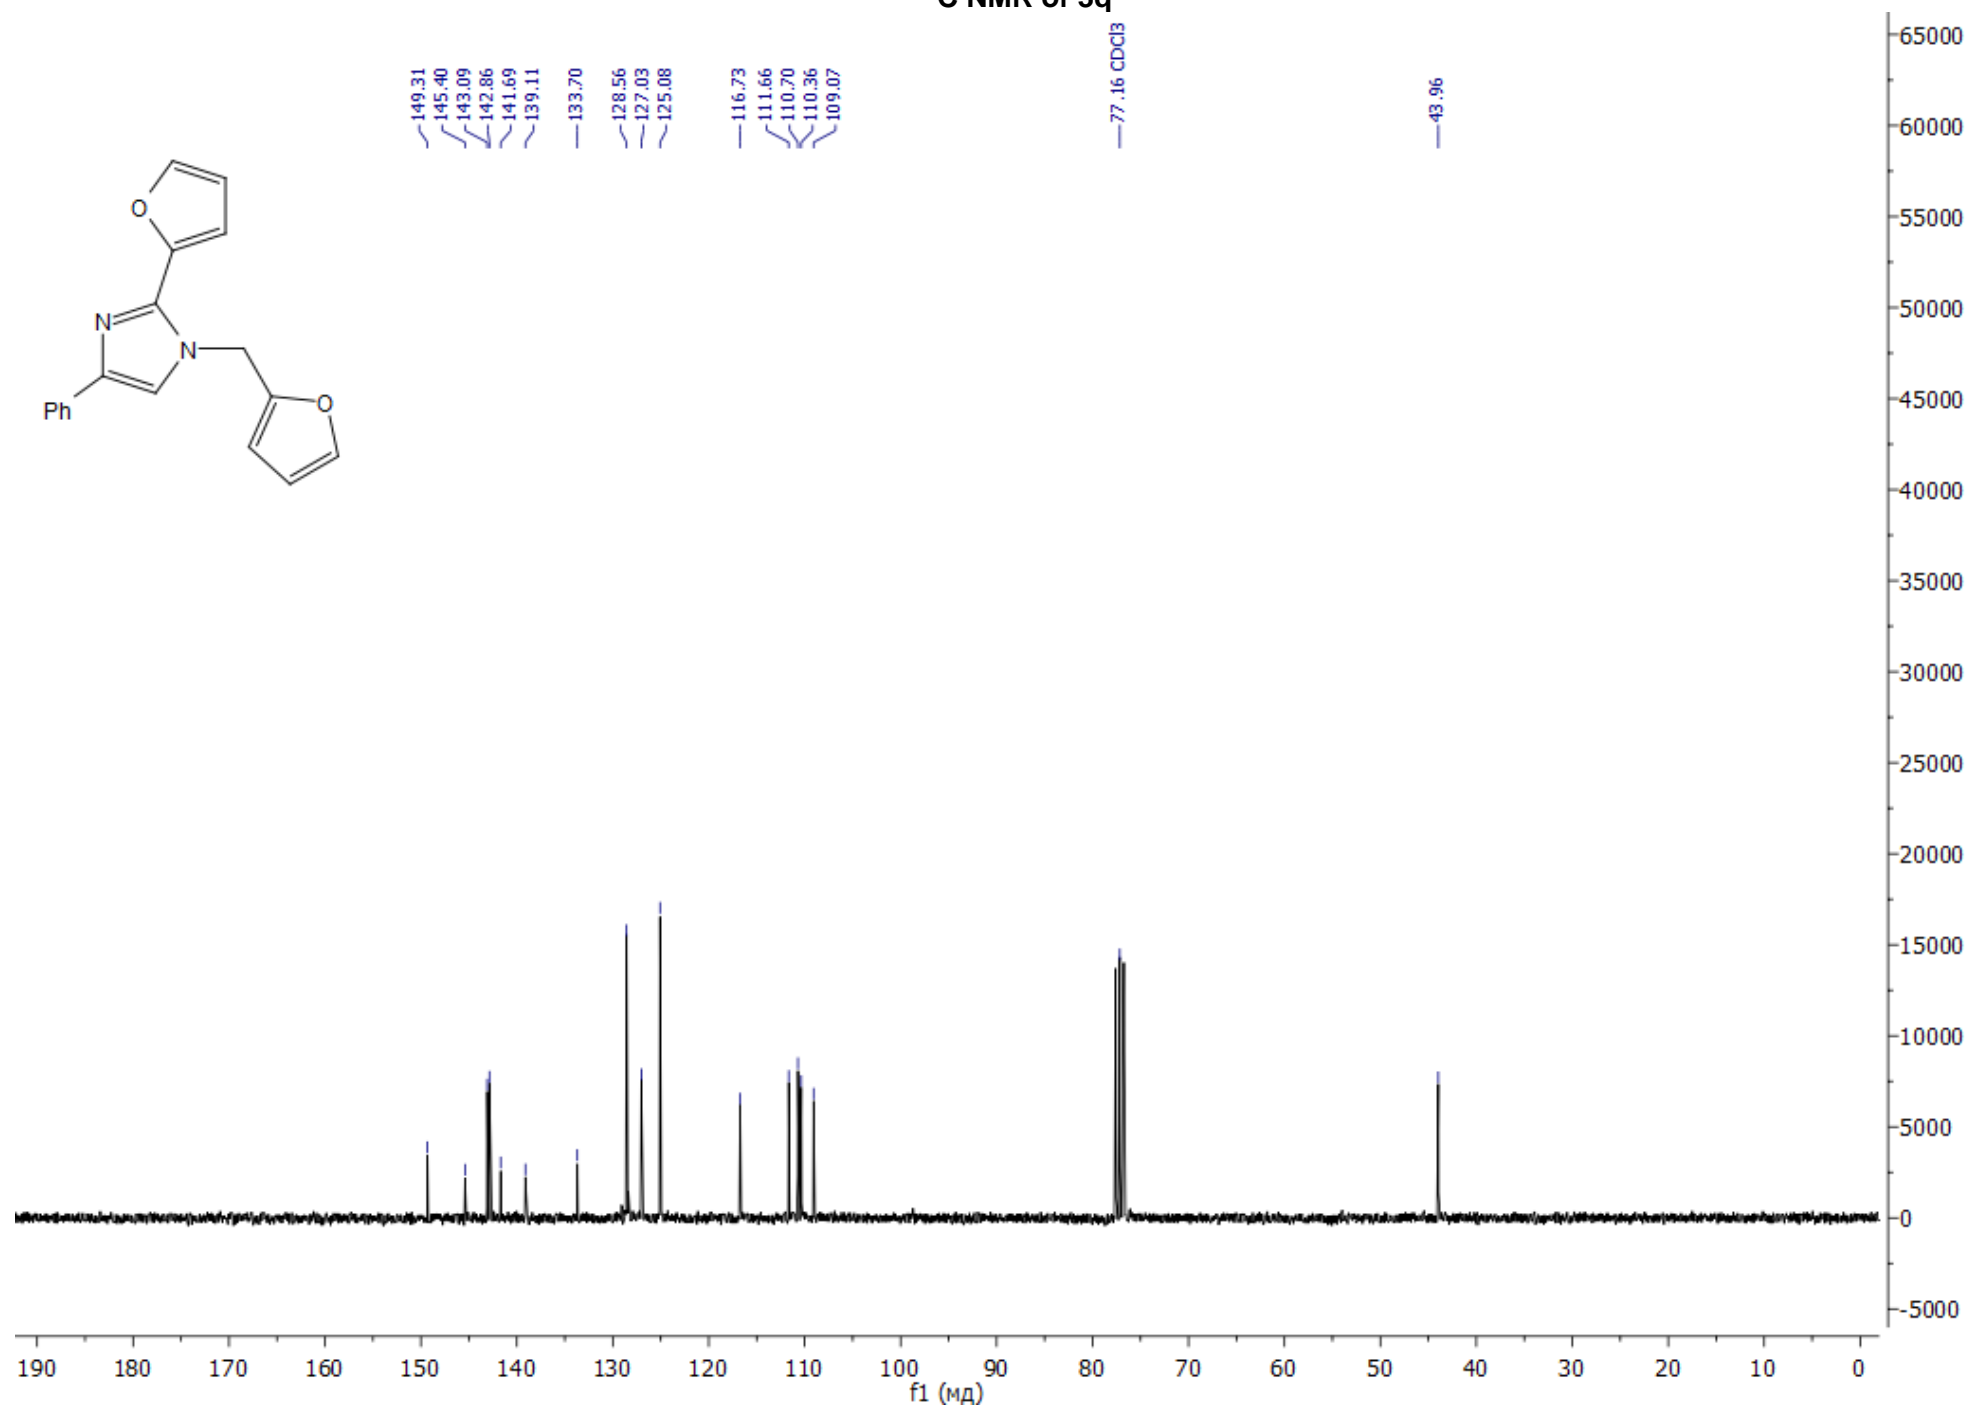

<sup>1</sup>H NMR of 3r

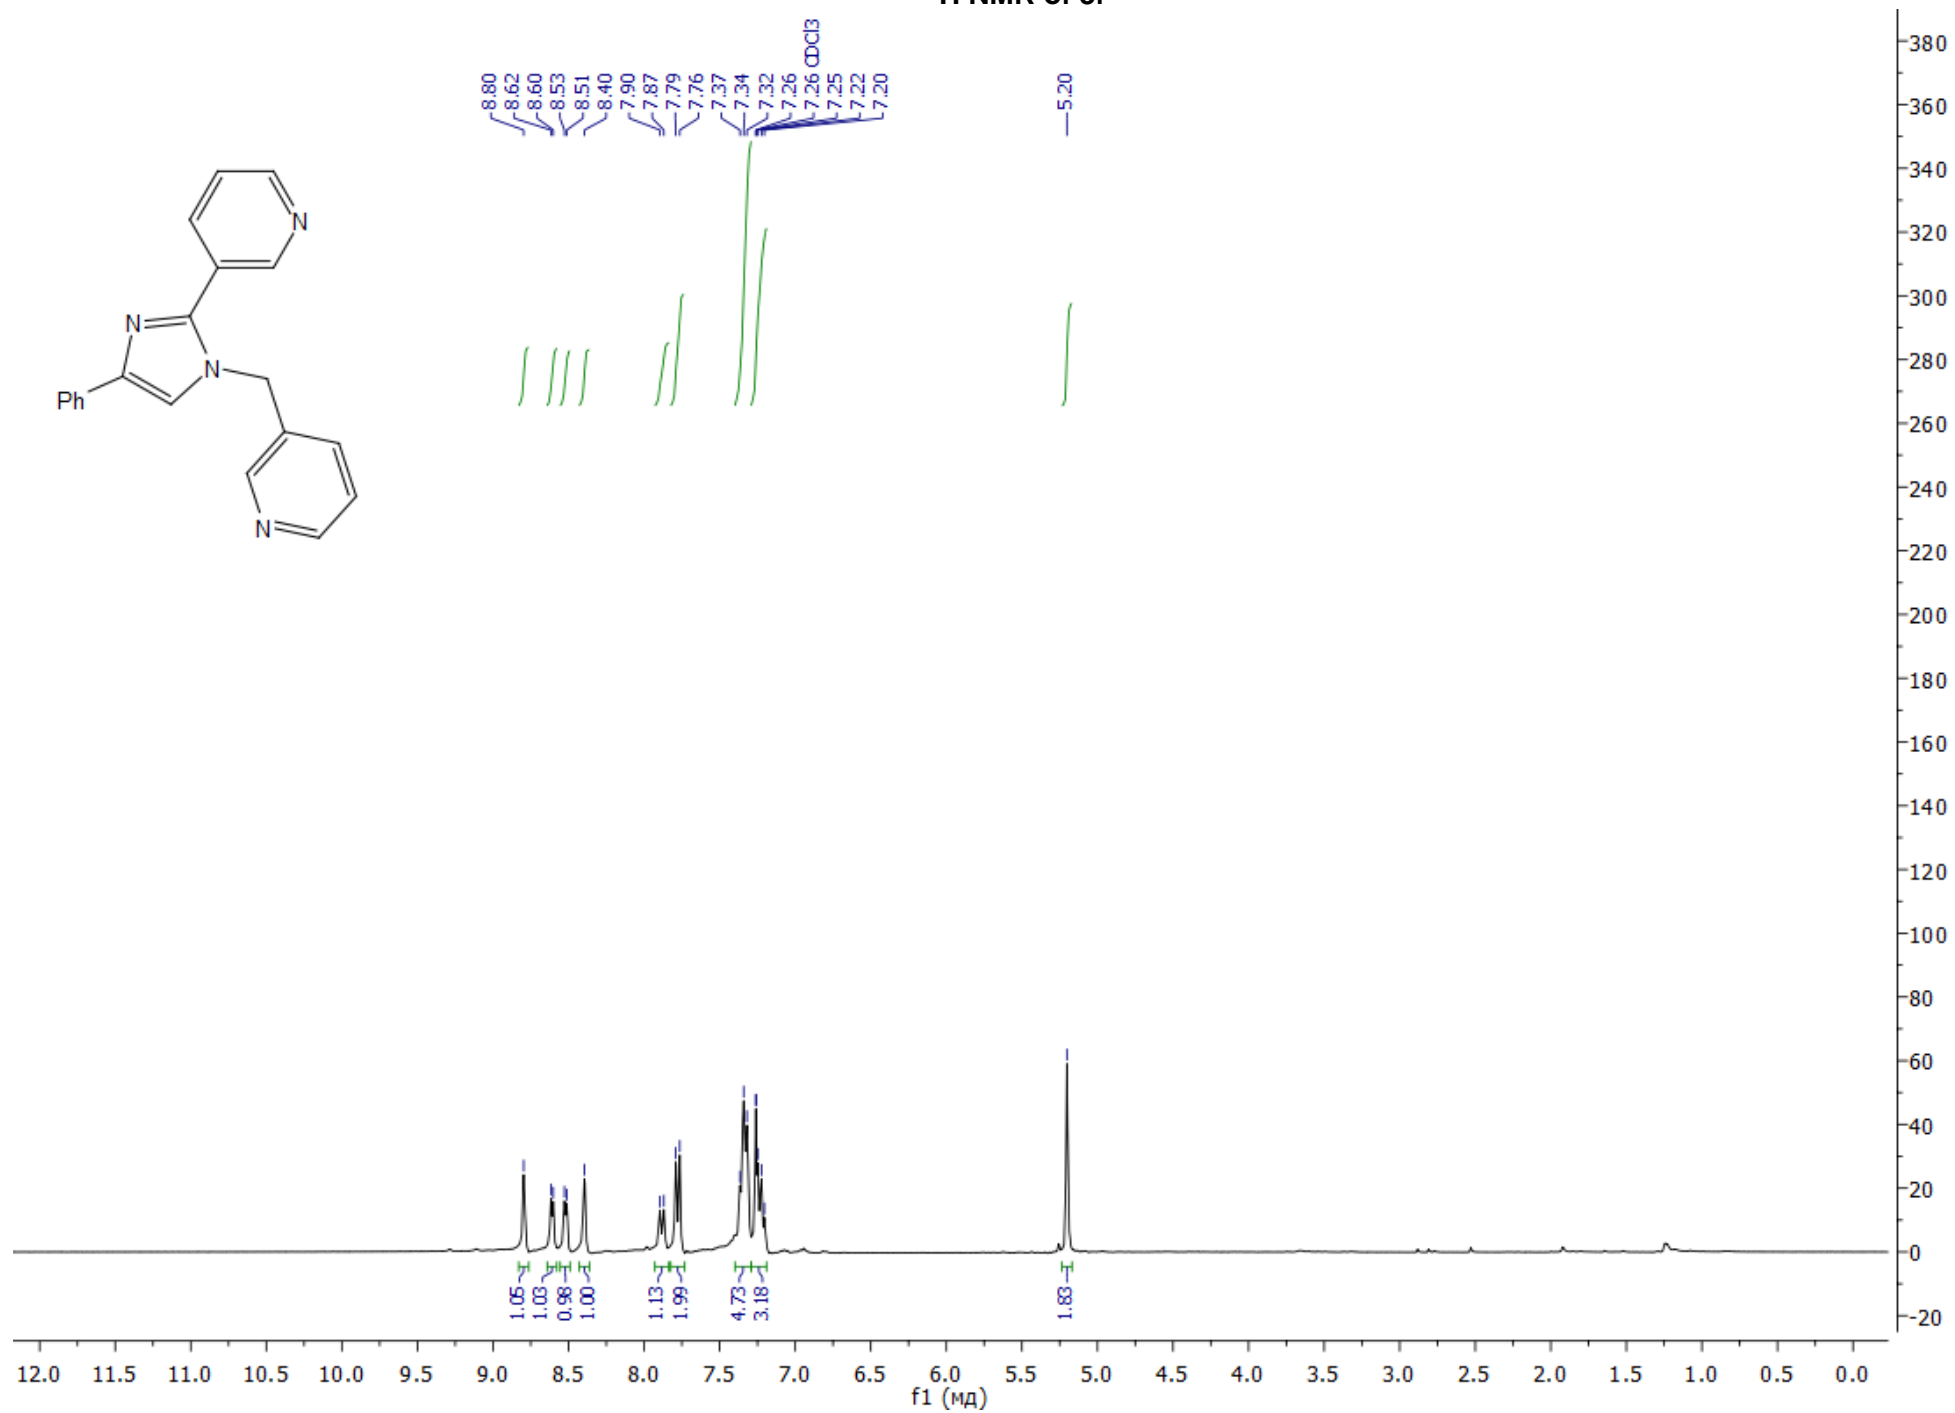

<sup>13</sup>C NMR of 3r

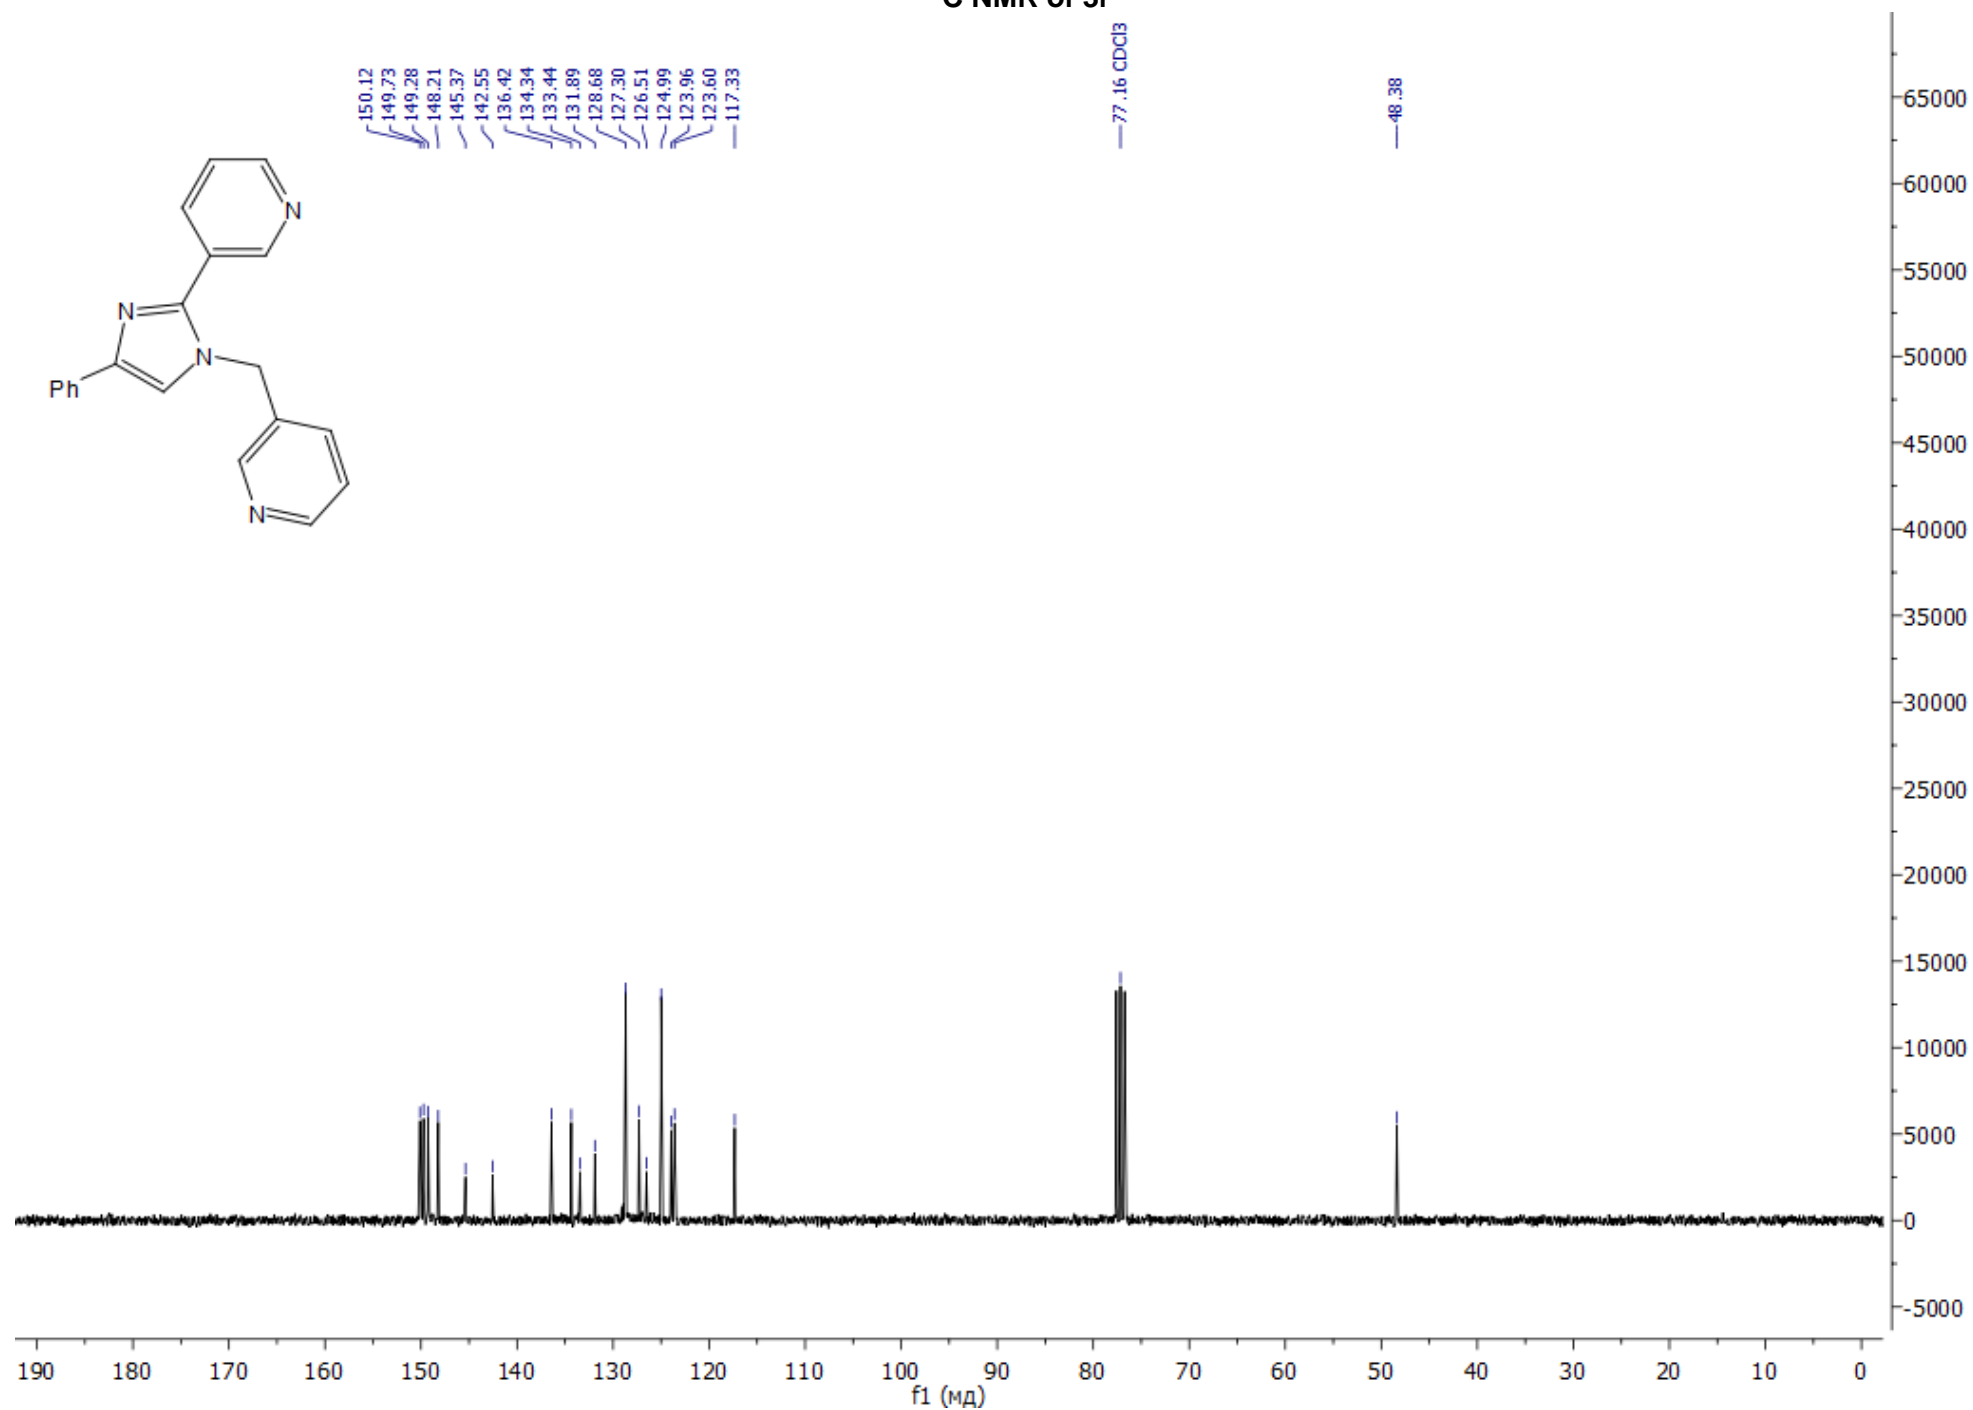

# HRMS spectra of synthesized compounds

## HRMS of 3a

### Display Report

#### Analysis Info

Analysis Name D:\Data\Chizhov\Terent'ev\l\sb-526\_&clblow.d  
 Method tune\_low\_1550.m  
 Sample Name /TERN SB-526  
 Comment CH3CN 100 %, dil. 2000, calibrant added

Acquisition Date 01.11.2022 12:45:26

Operator BDAL@DE  
 Instrument / Ser# maXis 43

#### Acquisition Parameter

|             |            |                      |          |                  |           |
|-------------|------------|----------------------|----------|------------------|-----------|
| Source Type | ESI        | Ion Polarity         | Positive | Set Nebulizer    | 0.4 Bar   |
| Focus       | Not active |                      |          | Set Dry Heater   | 180 °C    |
| Scan Begin  | 50 m/z     | Set Capillary        | 4500 V   | Set Dry Gas      | 4.0 l/min |
| Scan End    | 1550 m/z   | Set End Plate Offset | -500 V   | Set Divert Valve | Source    |

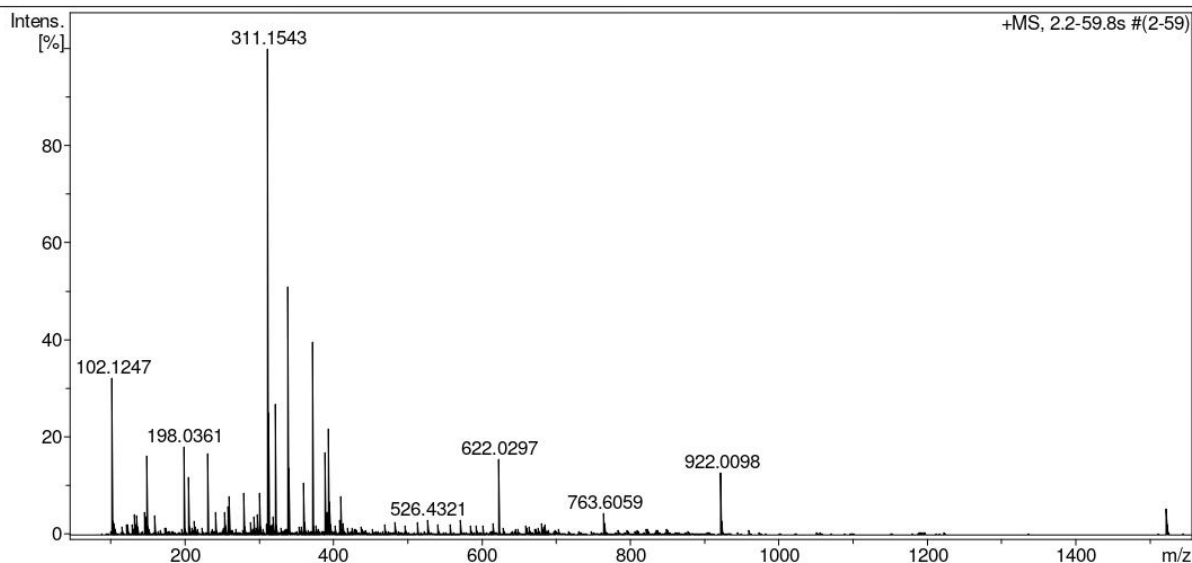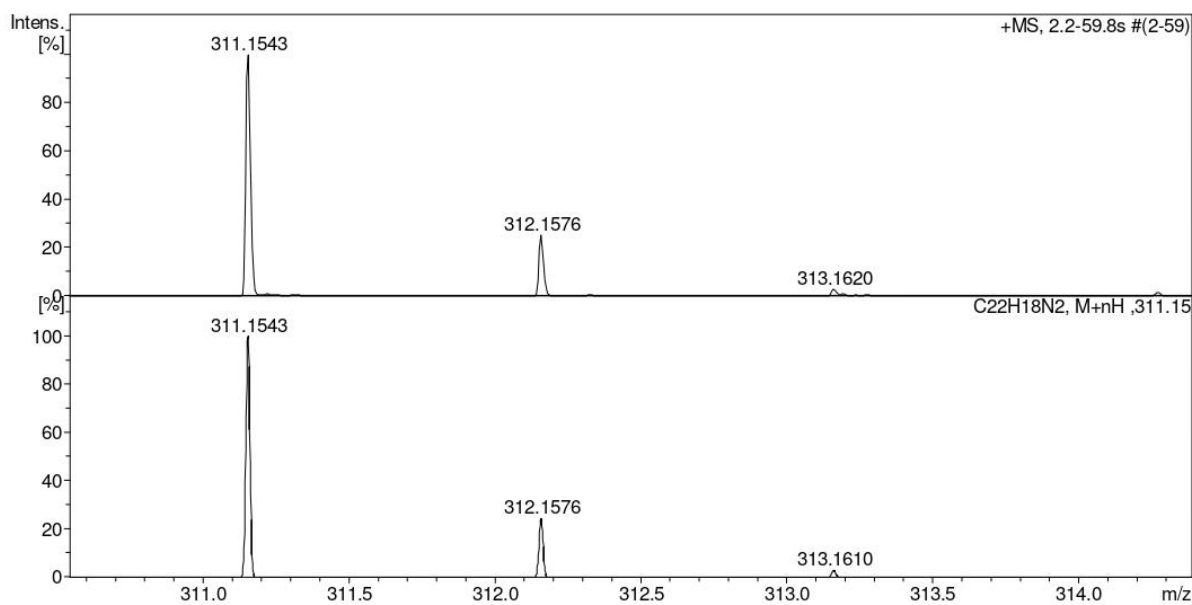

## Display Report

## Analysis Info

Analysis Name D:\Data\Chizhov\Terent'ev\Vi\sb-533\_&clblow.d  
Method tune\_low\_1550.m  
Sample Name /TERN SB-533  
Comment CH3CN 100 %, dil. 2000, calibrant added

Acquisition Date 01.11.2022 12:59:14

Operator BDAL@DE  
Instrument / Ser# maXis 43

## Acquisition Parameter

|             |            |                      |          |                  |           |
|-------------|------------|----------------------|----------|------------------|-----------|
| Source Type | ESI        | Ion Polarity         | Positive | Set Nebulizer    | 0.4 Bar   |
| Focus       | Not active |                      |          | Set Dry Heater   | 180 °C    |
| Scan Begin  | 50 m/z     | Set Capillary        | 4500 V   | Set Dry Gas      | 4.0 l/min |
| Scan End    | 1550 m/z   | Set End Plate Offset | -500 V   | Set Divert Valve | Source    |

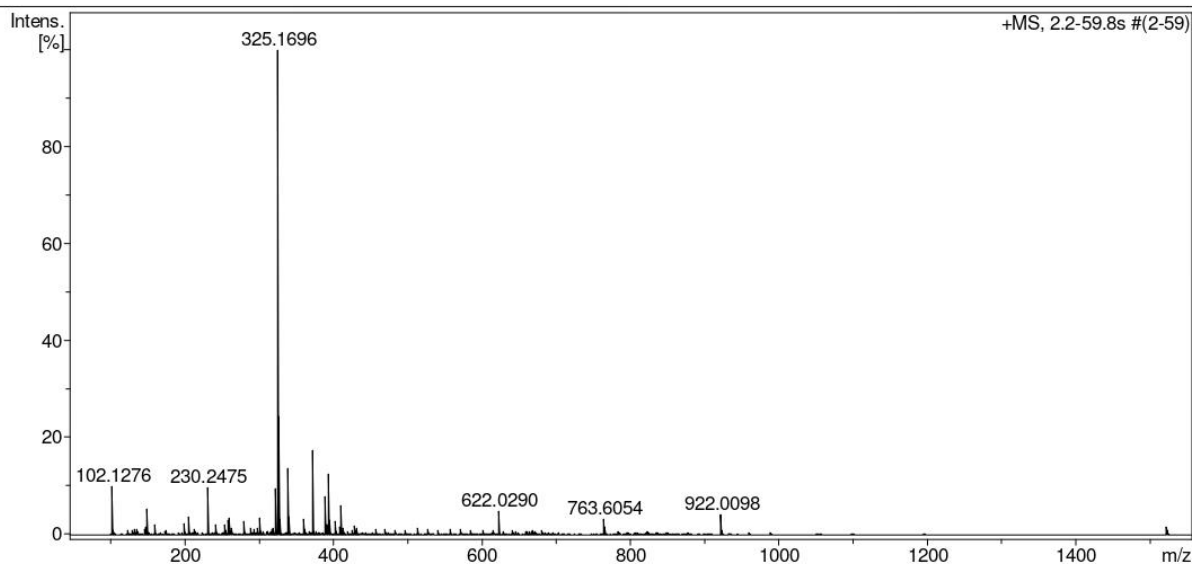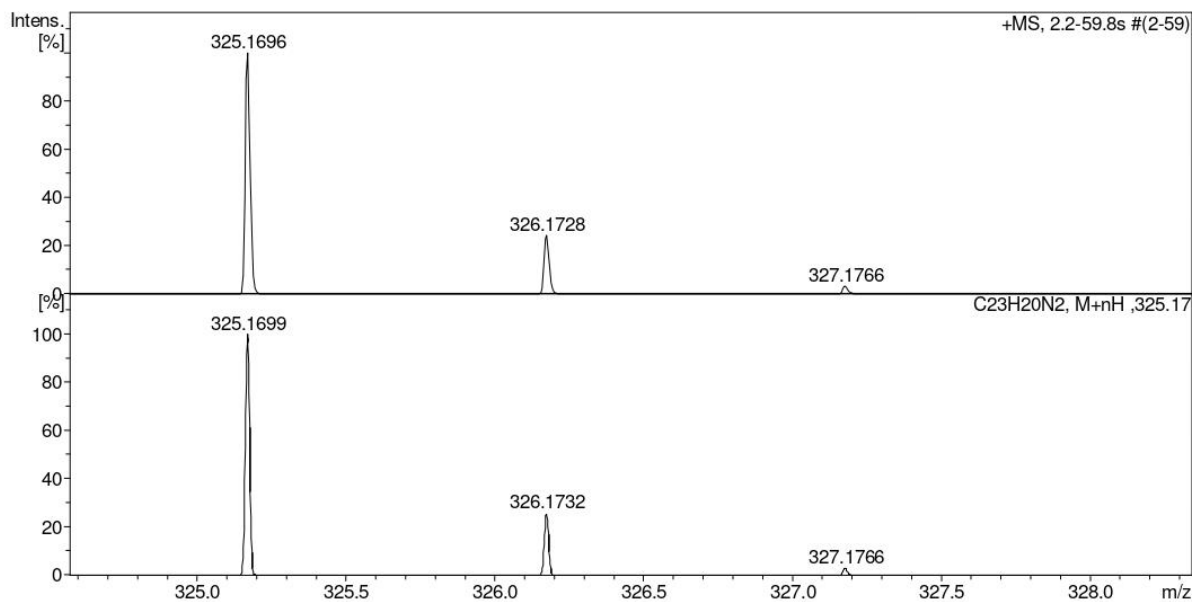

## Display Report

## Analysis Info

Analysis Name D:\Data\Chizhov\Terent'ev\Vi\sb-530\_&clblow.d  
Method tune\_low\_1550.m  
Sample Name /TERN SB-530  
Comment CH3CN 100 %, dil. 2000, calibrant added

Acquisition Date 01.11.2022 12:49:57

Operator BDAL@DE  
Instrument / Ser# maXis 43

## Acquisition Parameter

|             |            |                      |          |                  |           |
|-------------|------------|----------------------|----------|------------------|-----------|
| Source Type | ESI        | Ion Polarity         | Positive | Set Nebulizer    | 0.4 Bar   |
| Focus       | Not active |                      |          | Set Dry Heater   | 180 °C    |
| Scan Begin  | 50 m/z     | Set Capillary        | 4500 V   | Set Dry Gas      | 4.0 l/min |
| Scan End    | 1550 m/z   | Set End Plate Offset | -500 V   | Set Divert Valve | Source    |

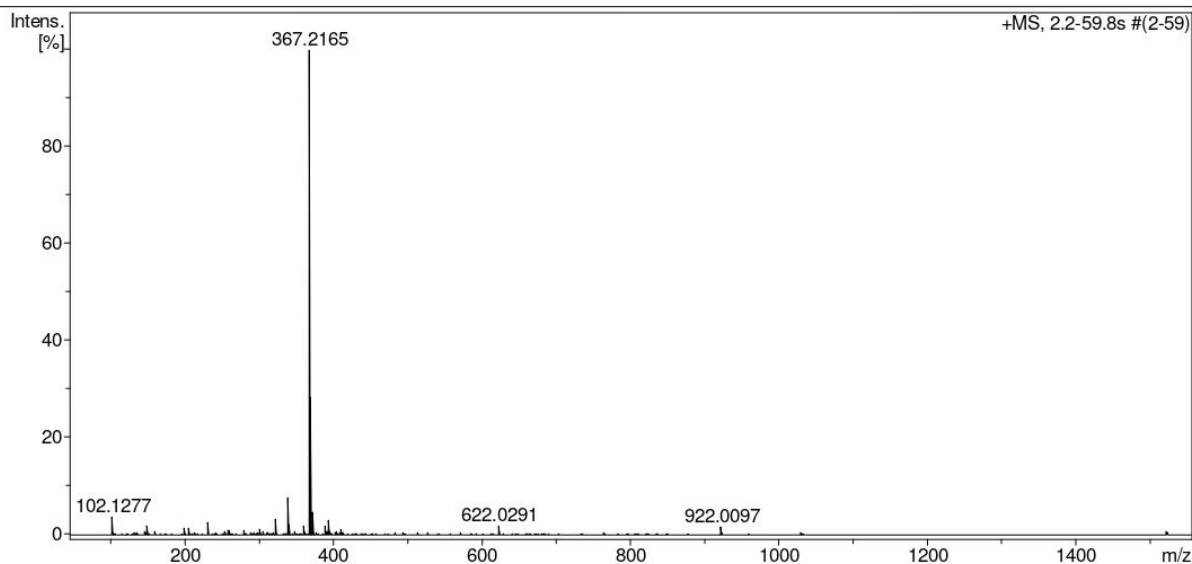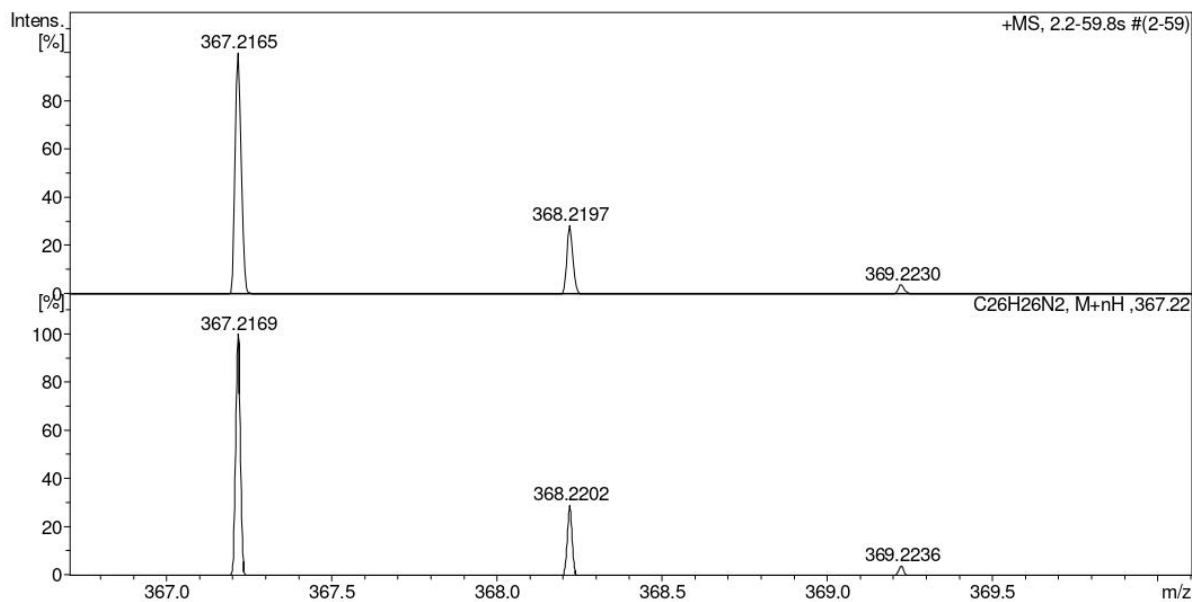



## Display Report

## Analysis Info

Analysis Name D:\Data\Chizhov\Terentiev\Wil\sb-536\_&clblow.d  
Method tune\_low.m  
Sample Name /TERN SB-536  
Comment CH3CN 100 %, dil. 2000, calibrant added

Acquisition Date 31.10.2022 17:33:58

Operator BDAL@DE  
Instrument / Ser# micrOTOF 10248

## Acquisition Parameter

|             |            |                      |          |                  |           |
|-------------|------------|----------------------|----------|------------------|-----------|
| Source Type | ESI        | Ion Polarity         | Positive | Set Nebulizer    | 0.4 Bar   |
| Focus       | Not active |                      |          | Set Dry Heater   | 180 °C    |
| Scan Begin  | 50 m/z     | Set Capillary        | 4500 V   | Set Dry Gas      | 4.0 l/min |
| Scan End    | 3000 m/z   | Set End Plate Offset | -500 V   | Set Divert Valve | Waste     |

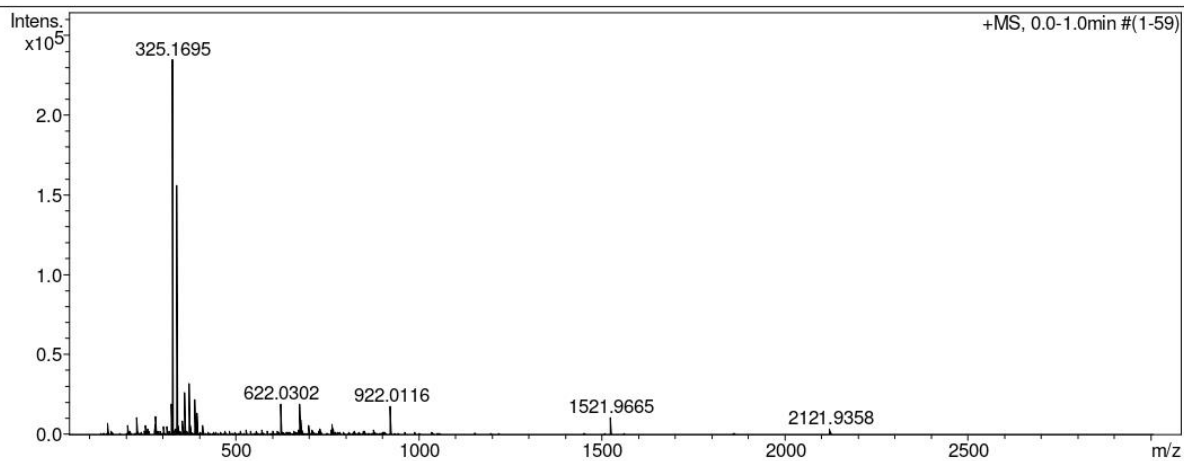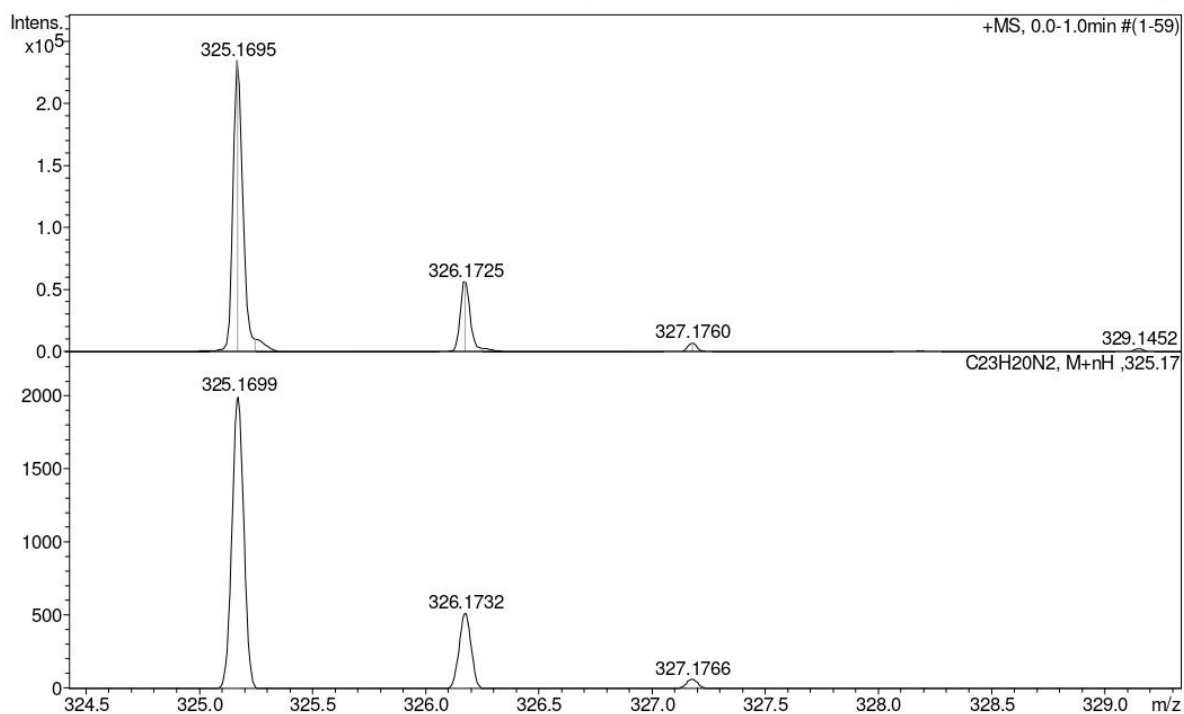

## Display Report

## Analysis Info

Analysis Name D:\Data\Kolotyrkina\2022\Vi\1101031.d  
Method tune\_low.m  
Sample Name /TERN SG541  
Comment C23H20N2O mH 341.1648 calibrant added, CH3CN

Acquisition Date 01.11.2022 17:32:25

Operator BDAL@DE  
Instrument / Ser# micrOTOF 10248

## Acquisition Parameter

|             |            |                      |          |                  |           |
|-------------|------------|----------------------|----------|------------------|-----------|
| Source Type | ESI        | Ion Polarity         | Positive | Set Nebulizer    | 0.4 Bar   |
| Focus       | Not active |                      |          | Set Dry Heater   | 180 °C    |
| Scan Begin  | 50 m/z     | Set Capillary        | 4500 V   | Set Dry Gas      | 4.0 l/min |
| Scan End    | 2500 m/z   | Set End Plate Offset | -500 V   | Set Divert Valve | Waste     |

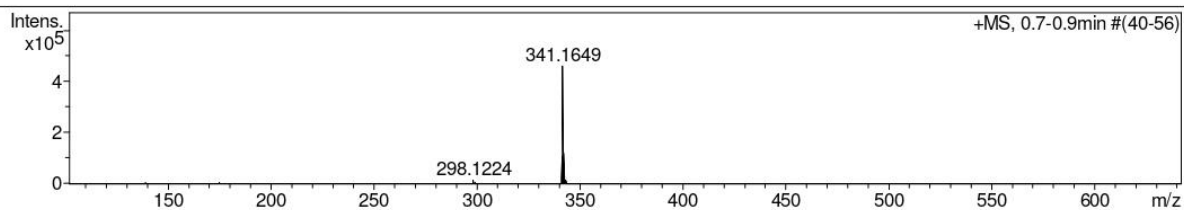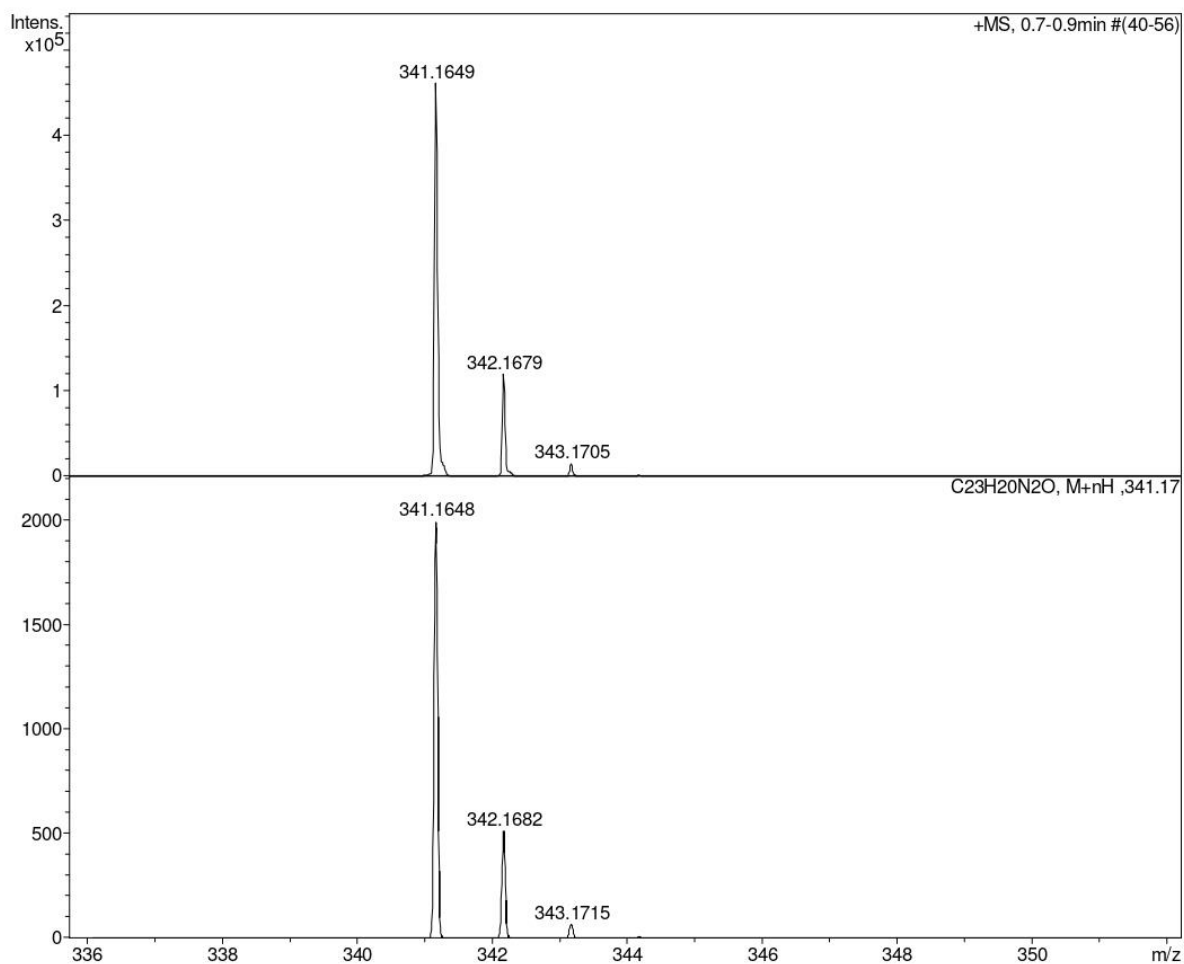

## Display Report

## Analysis Info

Analysis Name D:\Data\Chizhov\Terentiev\Wil\sb-512\_&clblow.d  
Method tune\_low.m  
Sample Name /TERN SB-512  
Comment CH3CN 100 %, dil. 2000, calibrant added

Acquisition Date 31.10.2022 17:29:44

Operator BDAL@DE  
Instrument / Ser# micrOTOF 10248

## Acquisition Parameter

|             |            |                      |          |                  |           |
|-------------|------------|----------------------|----------|------------------|-----------|
| Source Type | ESI        | Ion Polarity         | Positive | Set Nebulizer    | 0.4 Bar   |
| Focus       | Not active |                      |          | Set Dry Heater   | 180 °C    |
| Scan Begin  | 50 m/z     | Set Capillary        | 4500 V   | Set Dry Gas      | 4.0 l/min |
| Scan End    | 3000 m/z   | Set End Plate Offset | -500 V   | Set Divert Valve | Waste     |

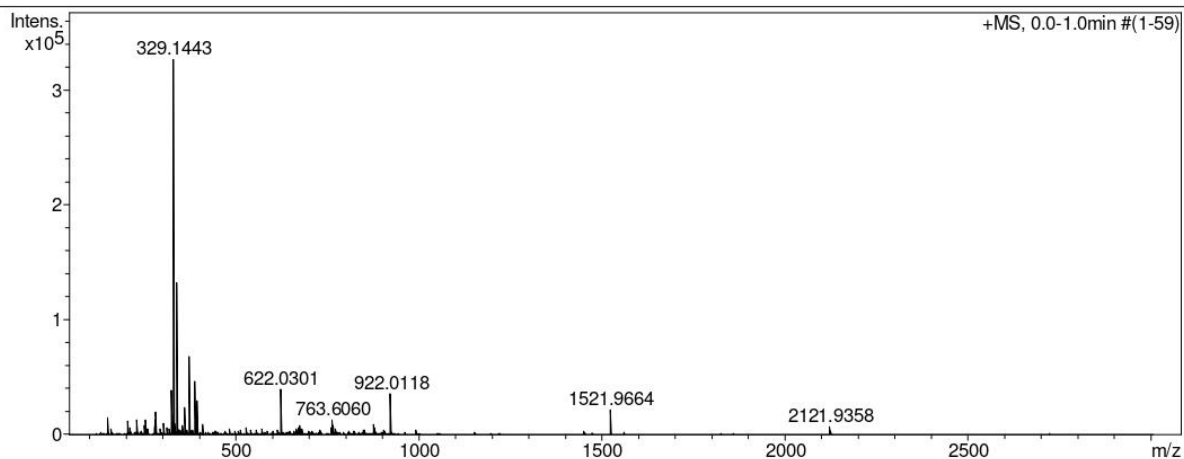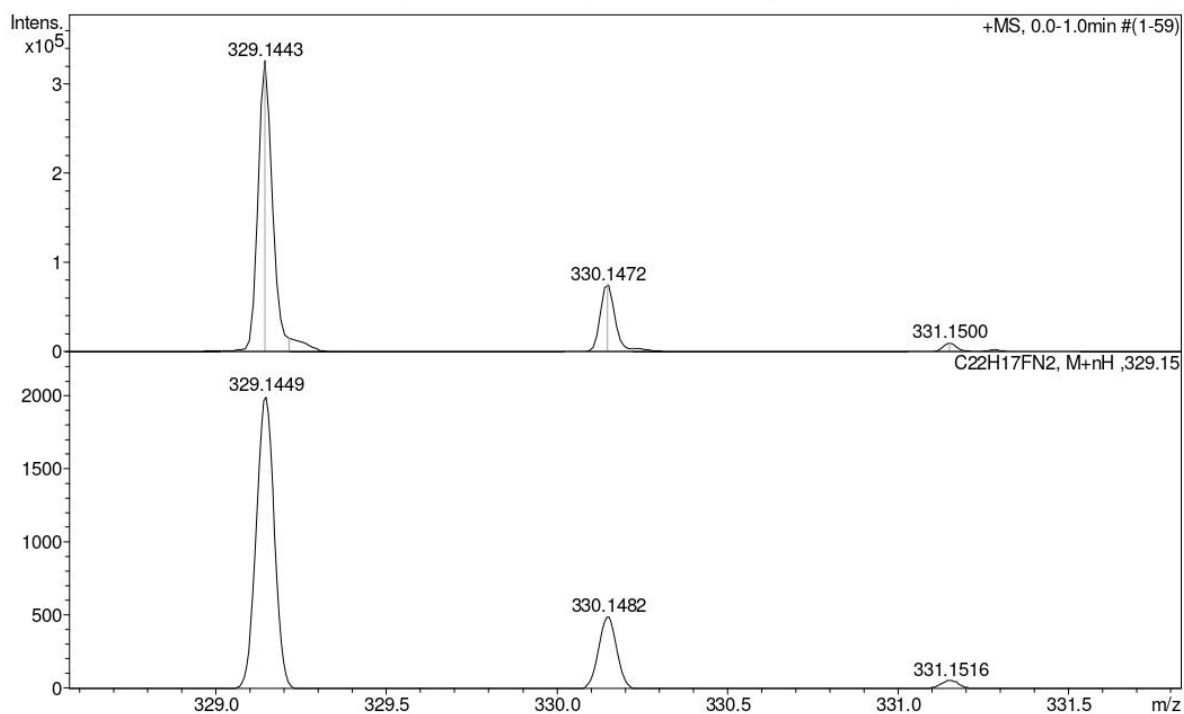

## Display Report

## Analysis Info

Analysis Name D:\Data\Chizhov\Terent'ev\Vi\sb-519\_&clblow.d  
Method tune\_low\_1550.m  
Sample Name /TERN SB-519  
Comment CH3CN 100 %, dil. 2000, calibrant added

Acquisition Date 01.11.2022 12:41:19

Operator BDAL@DE  
Instrument / Ser# maXis 43

## Acquisition Parameter

|             |            |                      |          |                  |           |
|-------------|------------|----------------------|----------|------------------|-----------|
| Source Type | ESI        | Ion Polarity         | Positive | Set Nebulizer    | 0.4 Bar   |
| Focus       | Not active |                      |          | Set Dry Heater   | 180 °C    |
| Scan Begin  | 50 m/z     | Set Capillary        | 4500 V   | Set Dry Gas      | 4.0 l/min |
| Scan End    | 1550 m/z   | Set End Plate Offset | -500 V   | Set Divert Valve | Source    |

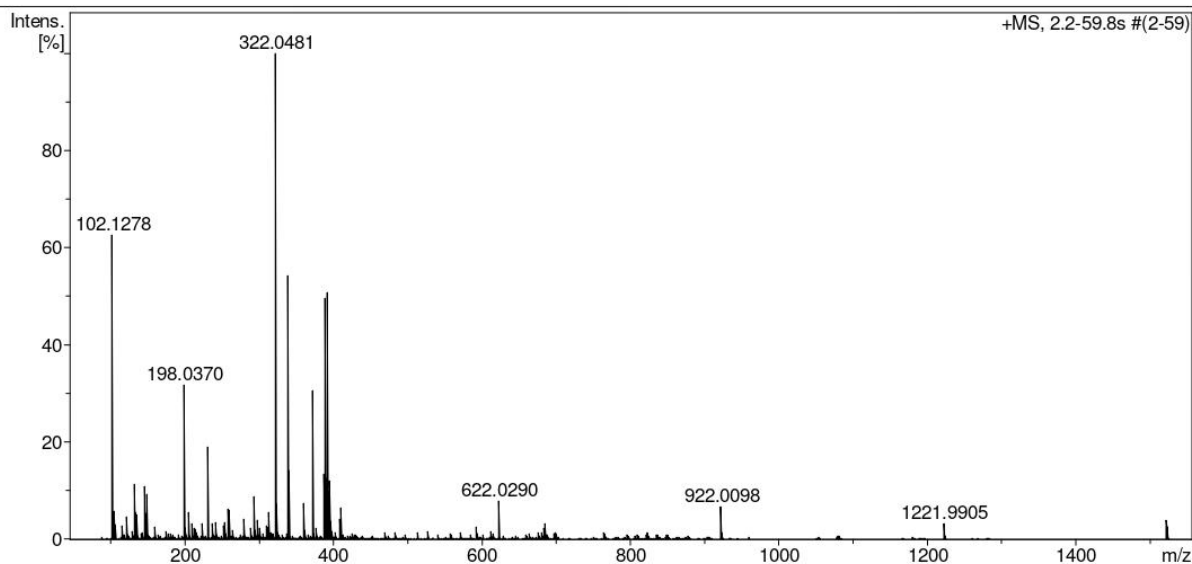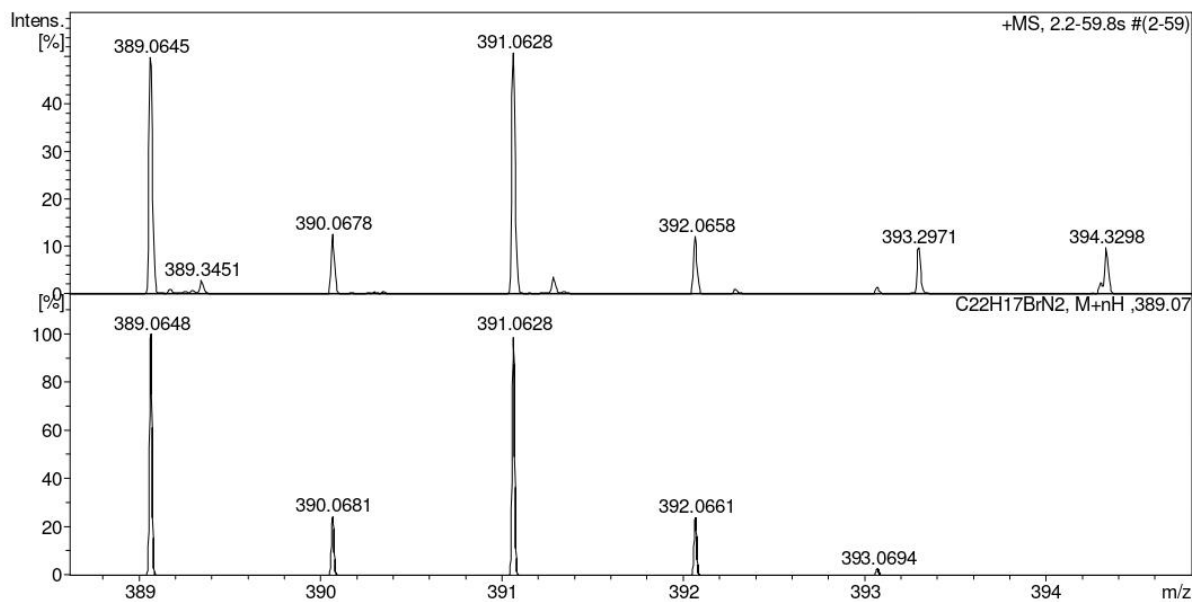

## Display Report

## Analysis Info

Analysis Name D:\Data\Chizhov\Terentiev\Willsg-550\_&clblow.d  
Method tune\_low.m  
Sample Name /TERN SG-550  
Comment CH3CN 100 %, dil. 20000, calibrant added

Acquisition Date 30.06.2022 16:34:43

Operator BDAL@DE  
Instrument / Ser# micrOTOF 10248

## Acquisition Parameter

|             |            |                      |          |                  |           |
|-------------|------------|----------------------|----------|------------------|-----------|
| Source Type | ESI        | Ion Polarity         | Positive | Set Nebulizer    | 0.4 Bar   |
| Focus       | Not active |                      |          | Set Dry Heater   | 180 °C    |
| Scan Begin  | 50 m/z     | Set Capillary        | 4500 V   | Set Dry Gas      | 4.0 l/min |
| Scan End    | 3000 m/z   | Set End Plate Offset | -500 V   | Set Divert Valve | Waste     |

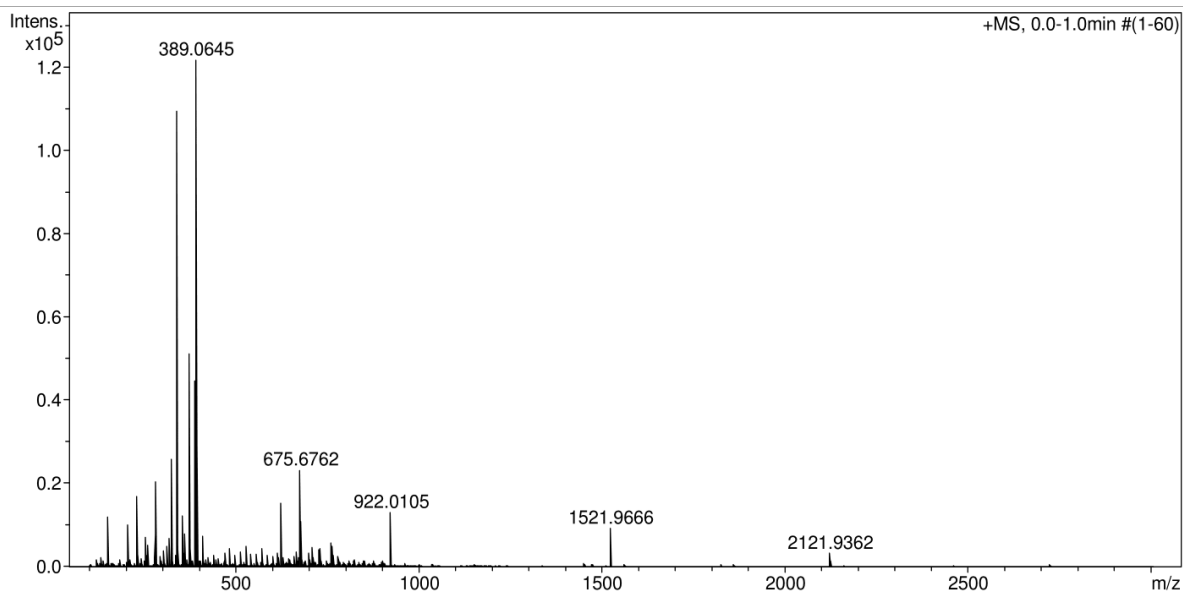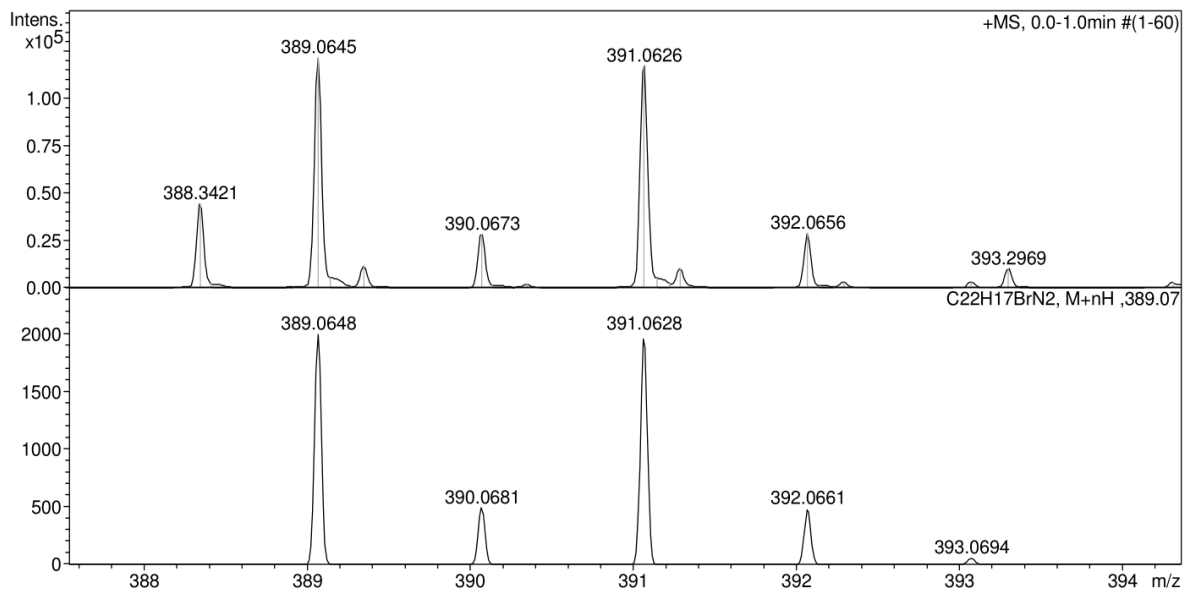

## Display Report

## Analysis Info

Analysis Name D:\Data\Chizhov\Terentiev\Wil\sb-544\_&clblow.d  
Method tune\_low.m  
Sample Name /TERN SB-544  
Comment CH3CN 100 %, dil. 2000, calibrant added

Acquisition Date 31.10.2022 17:10:30

Operator BDAL@DE  
Instrument / Ser# micrOTOF 10248

## Acquisition Parameter

|             |            |                      |          |                  |           |
|-------------|------------|----------------------|----------|------------------|-----------|
| Source Type | ESI        | Ion Polarity         | Positive | Set Nebulizer    | 0.4 Bar   |
| Focus       | Not active |                      |          | Set Dry Heater   | 180 °C    |
| Scan Begin  | 50 m/z     | Set Capillary        | 4500 V   | Set Dry Gas      | 4.0 l/min |
| Scan End    | 3000 m/z   | Set End Plate Offset | -500 V   | Set Divert Valve | Waste     |

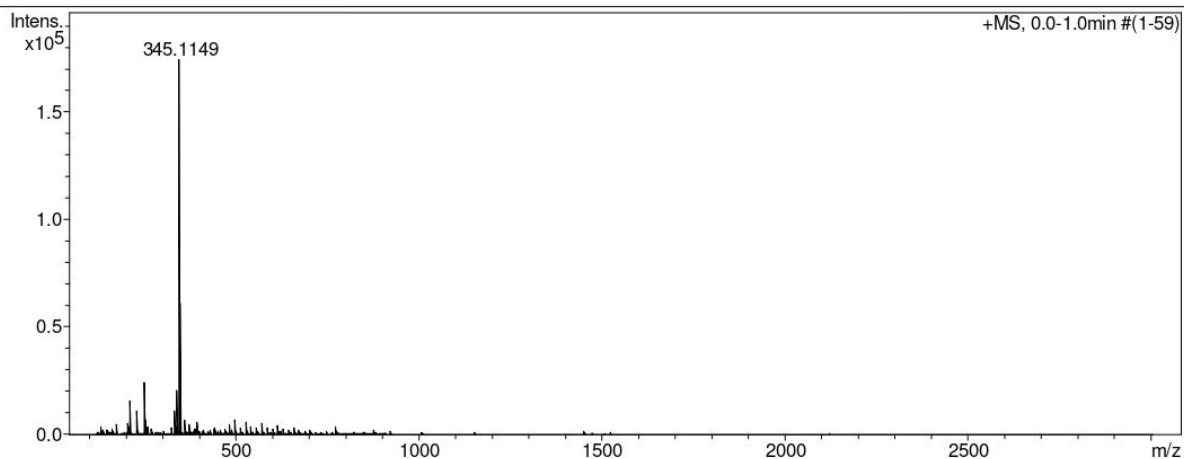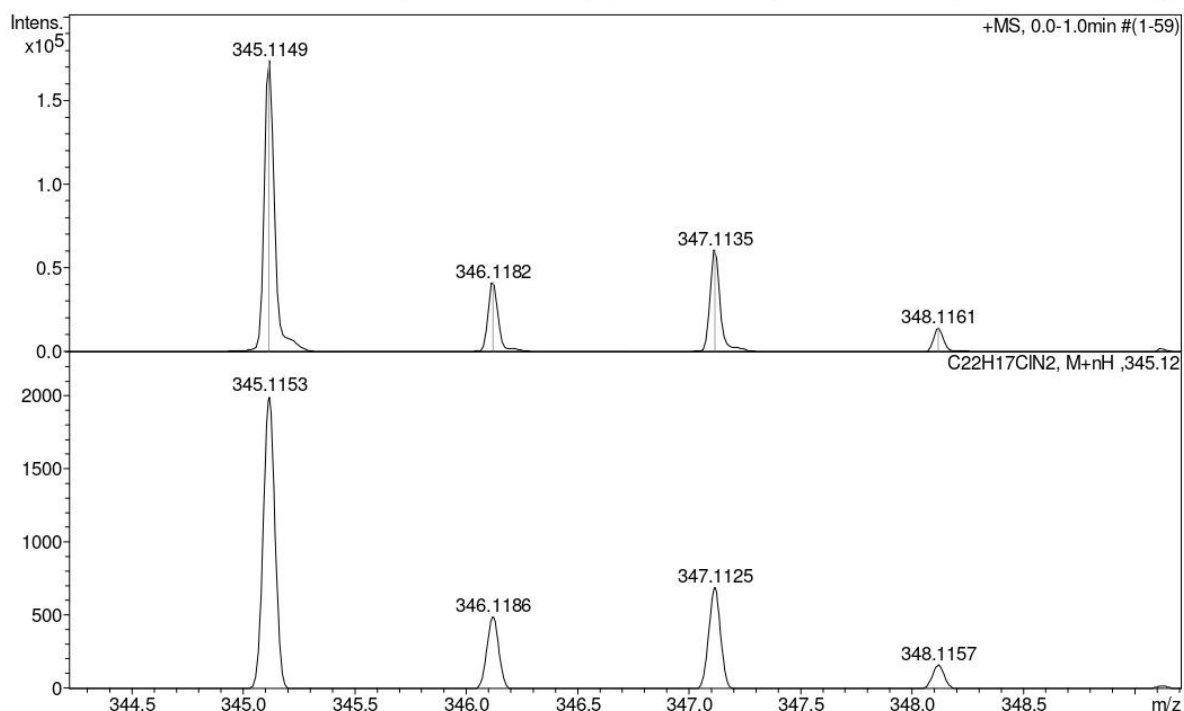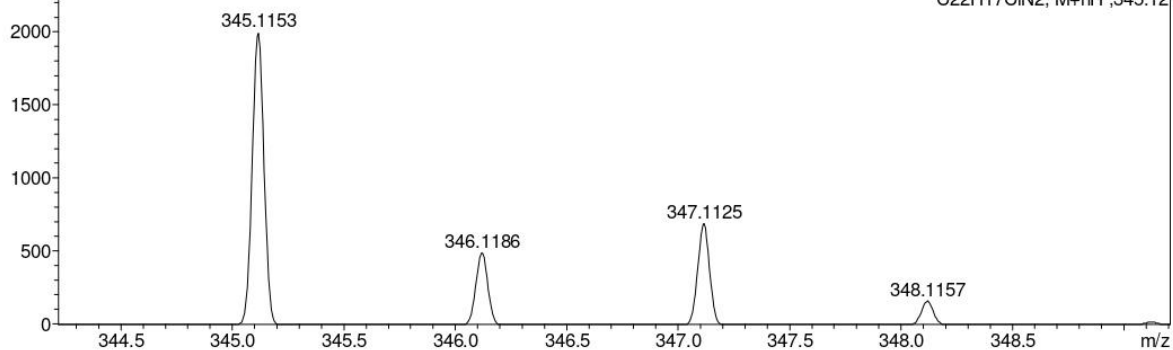

## Display Report

## Analysis Info

Analysis Name D:\Data\Chizhov\Terentiev\Willsg-514\_&clblow.d  
Method tune\_low.m  
Sample Name /TERN SG-514  
Comment CH3CN 100 %, dil. 2000, calibrant added

Acquisition Date 11.04.2022 12:16:49

Operator BDAL@DE  
Instrument / Ser# micrOTOF 10248

## Acquisition Parameter

|             |            |                      |          |                  |           |
|-------------|------------|----------------------|----------|------------------|-----------|
| Source Type | ESI        | Ion Polarity         | Positive | Set Nebulizer    | 0.4 Bar   |
| Focus       | Not active |                      |          | Set Dry Heater   | 180 °C    |
| Scan Begin  | 50 m/z     | Set Capillary        | 4500 V   | Set Dry Gas      | 4.0 l/min |
| Scan End    | 3000 m/z   | Set End Plate Offset | -500 V   | Set Divert Valve | Waste     |

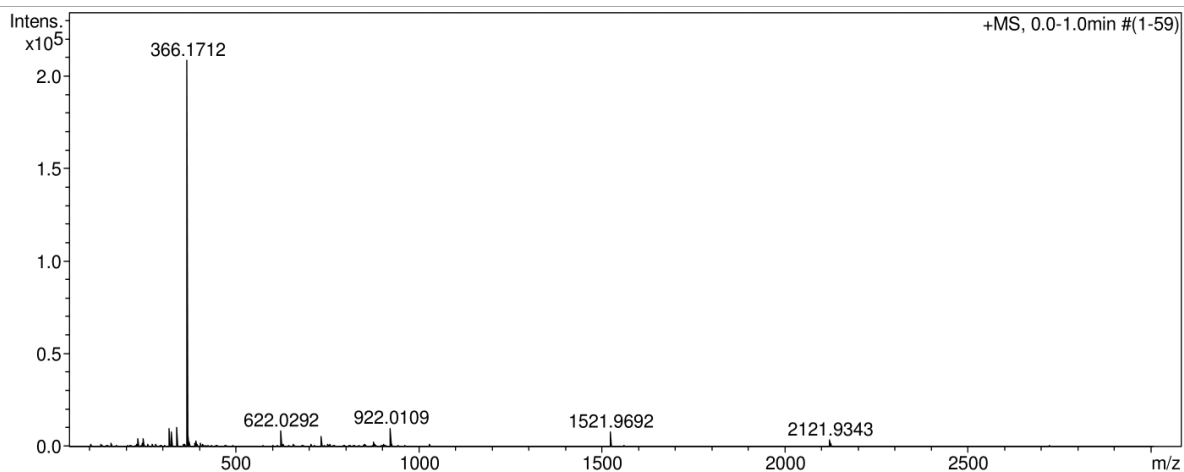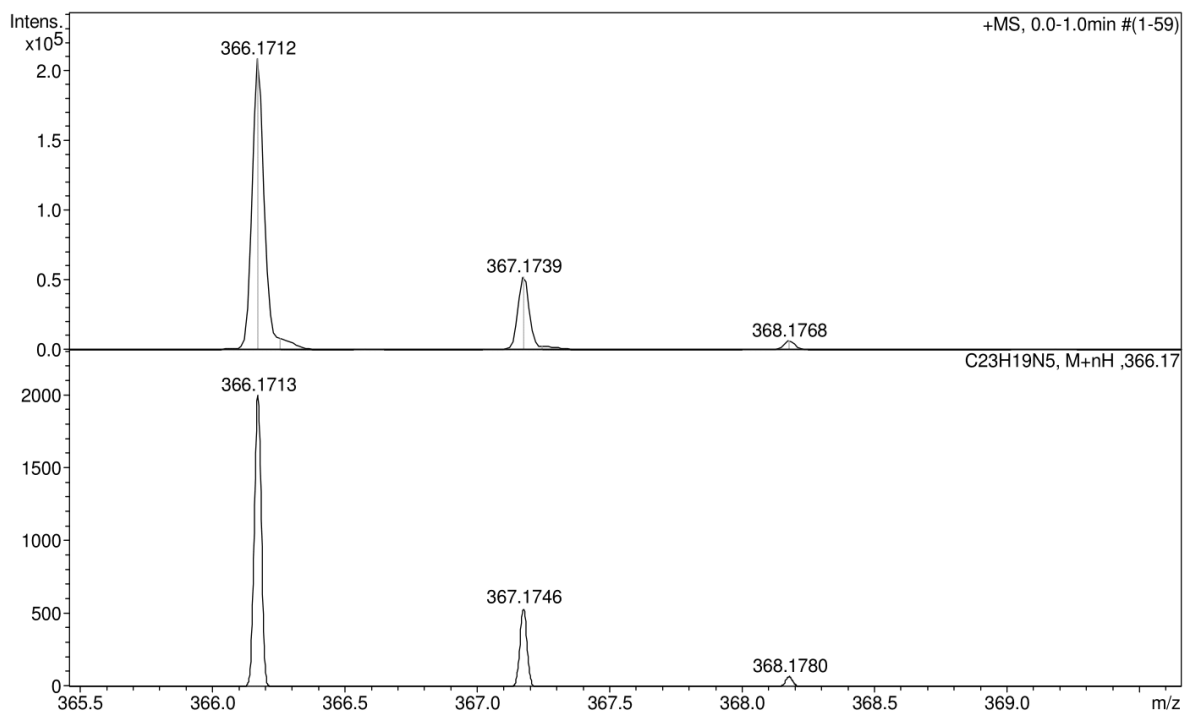

## Display Report

## Analysis Info

Analysis Name D:\Data\Chizhov\Terent'ev\Vi\sb-539\_&clblow.d  
Method tune\_low\_1550.m  
Sample Name /TERN SB-539  
Comment CH3CN 100 %, dil. 2000, calibrant added

Acquisition Date 01.11.2022 13:14:17

Operator BDAL@DE  
Instrument / Ser# maXis 43

## Acquisition Parameter

|             |            |                      |          |                  |           |
|-------------|------------|----------------------|----------|------------------|-----------|
| Source Type | ESI        | Ion Polarity         | Positive | Set Nebulizer    | 0.4 Bar   |
| Focus       | Not active |                      |          | Set Dry Heater   | 180 °C    |
| Scan Begin  | 50 m/z     | Set Capillary        | 4500 V   | Set Dry Gas      | 4.0 l/min |
| Scan End    | 1550 m/z   | Set End Plate Offset | -500 V   | Set Divert Valve | Source    |

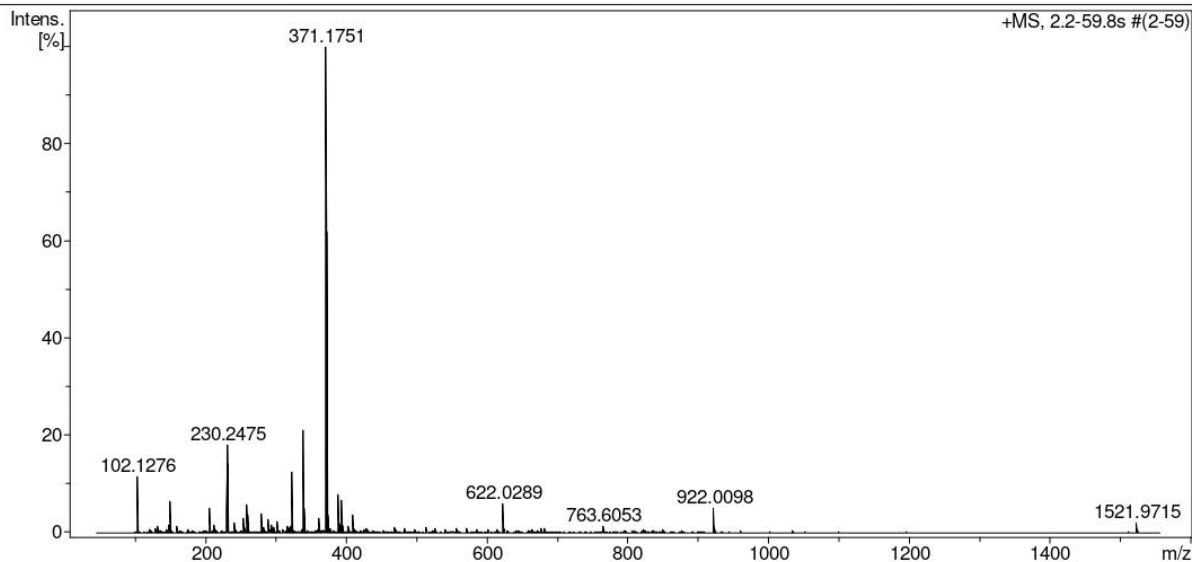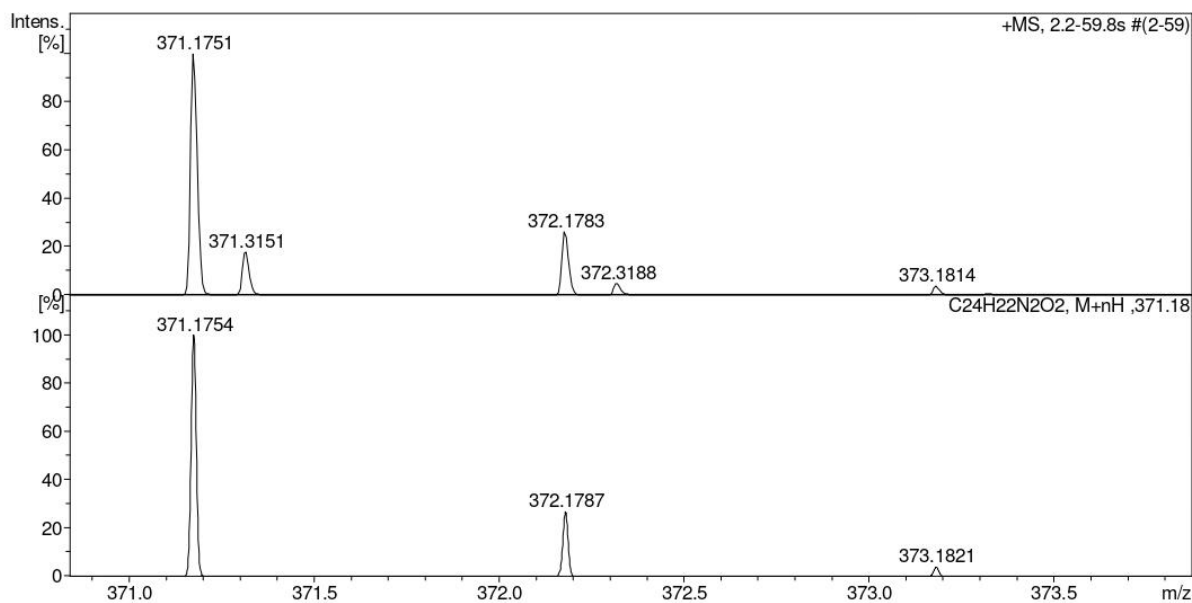



## Display Report

## Analysis Info

Analysis Name D:\Data\Chizhov\Terent'ev\Vi\sb-545\_&clblow.d  
Method tune\_low\_1550.m  
Sample Name /TERN SB-545  
Comment CH3CN 100 %, dil. 2000, calibrant added

Acquisition Date 01.11.2022 13:18:24

Operator BDAL@DE  
Instrument / Ser# maXis 43

## Acquisition Parameter

|             |            |                      |          |                  |           |
|-------------|------------|----------------------|----------|------------------|-----------|
| Source Type | ESI        | Ion Polarity         | Positive | Set Nebulizer    | 0.4 Bar   |
| Focus       | Not active |                      |          | Set Dry Heater   | 180 °C    |
| Scan Begin  | 50 m/z     | Set Capillary        | 4500 V   | Set Dry Gas      | 4.0 l/min |
| Scan End    | 1550 m/z   | Set End Plate Offset | -500 V   | Set Divert Valve | Source    |

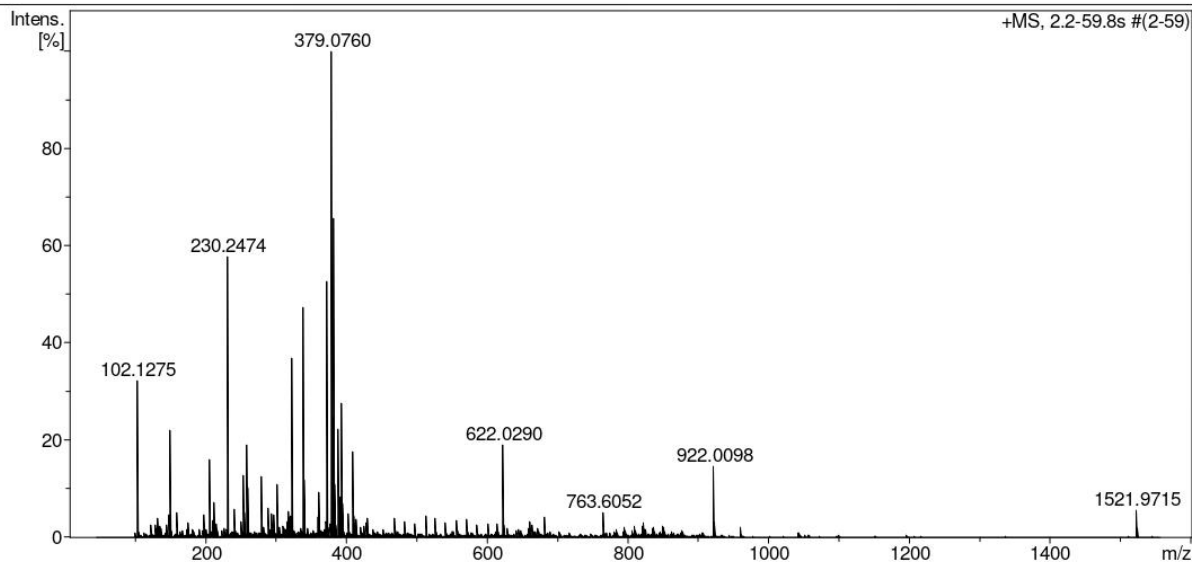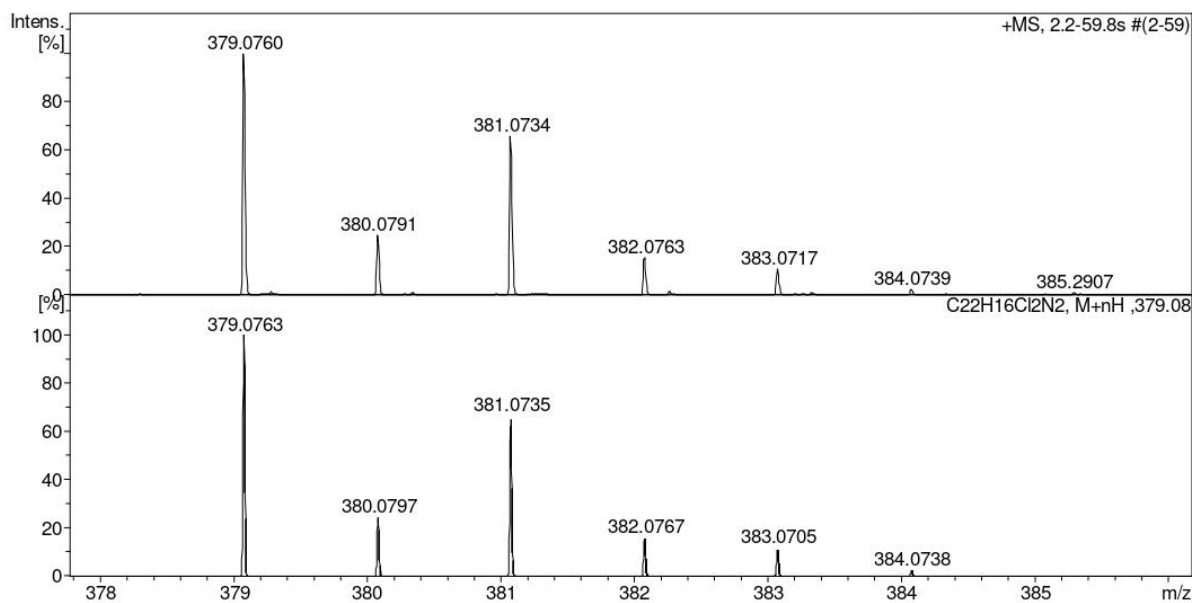

## Display Report

## Analysis Info

Analysis Name D:\Data\Chizhov\Terent'ev\Vi\sb-536-2\_&clblow.d  
Method tune\_low\_1550.m  
Sample Name /TERN SB-536-2  
Comment CH3CN 100 %, dil. 2000, calibrant added

Acquisition Date 01.11.2022 13:03:24

Operator BDAL@DE  
Instrument / Ser# maXis 43

## Acquisition Parameter

|             |            |                      |          |                  |           |
|-------------|------------|----------------------|----------|------------------|-----------|
| Source Type | ESI        | Ion Polarity         | Positive | Set Nebulizer    | 0.4 Bar   |
| Focus       | Not active |                      |          | Set Dry Heater   | 180 °C    |
| Scan Begin  | 50 m/z     | Set Capillary        | 4500 V   | Set Dry Gas      | 4.0 l/min |
| Scan End    | 1550 m/z   | Set End Plate Offset | -500 V   | Set Divert Valve | Source    |

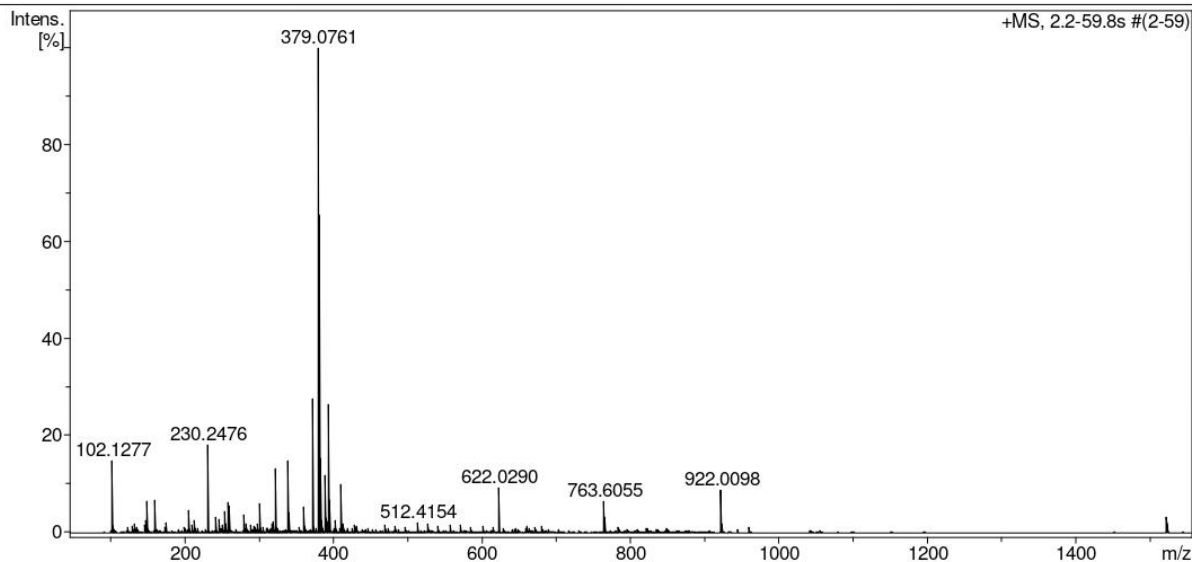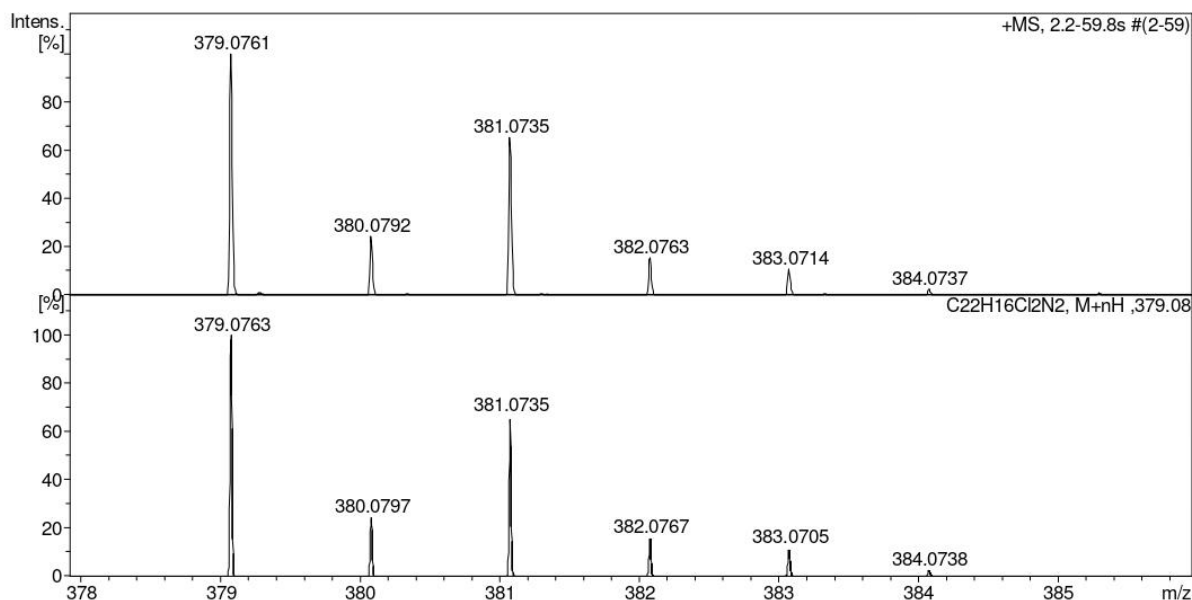

## Display Report

## Analysis Info

Analysis Name D:\Data\Chizhov\Terentiev\Wil\sb-543\_&clblow.d  
Method tune\_low.m  
Sample Name /TERN SB-543  
Comment CH3CN 100 %, dil. 2000, calibrant added

Acquisition Date 31.10.2022 17:05:10

Operator BDAL@DE  
Instrument / Ser# micrOTOF 10248

## Acquisition Parameter

|             |            |                      |          |                  |           |
|-------------|------------|----------------------|----------|------------------|-----------|
| Source Type | ESI        | Ion Polarity         | Positive | Set Nebulizer    | 0.4 Bar   |
| Focus       | Not active |                      |          | Set Dry Heater   | 180 °C    |
| Scan Begin  | 50 m/z     | Set Capillary        | 4500 V   | Set Dry Gas      | 4.0 l/min |
| Scan End    | 3000 m/z   | Set End Plate Offset | -500 V   | Set Divert Valve | Waste     |

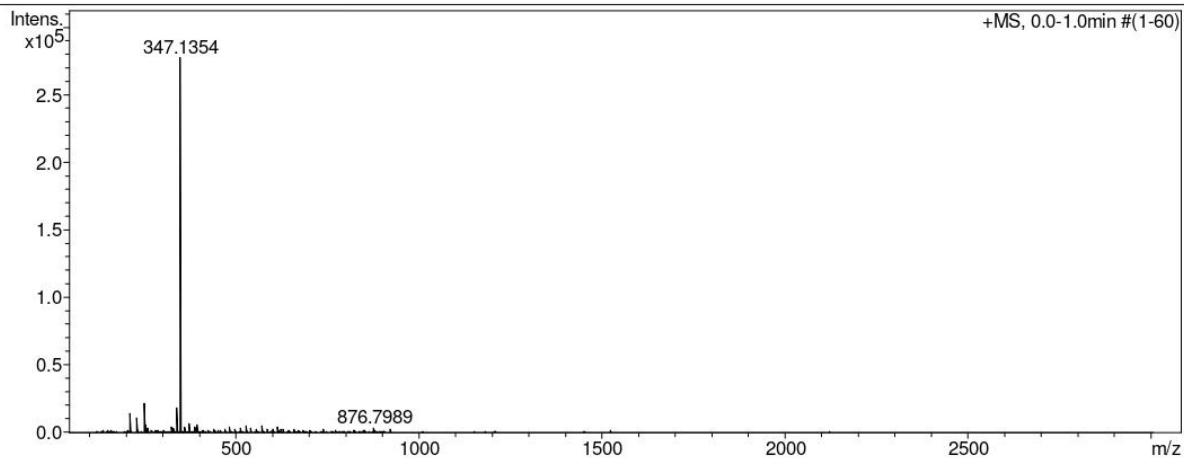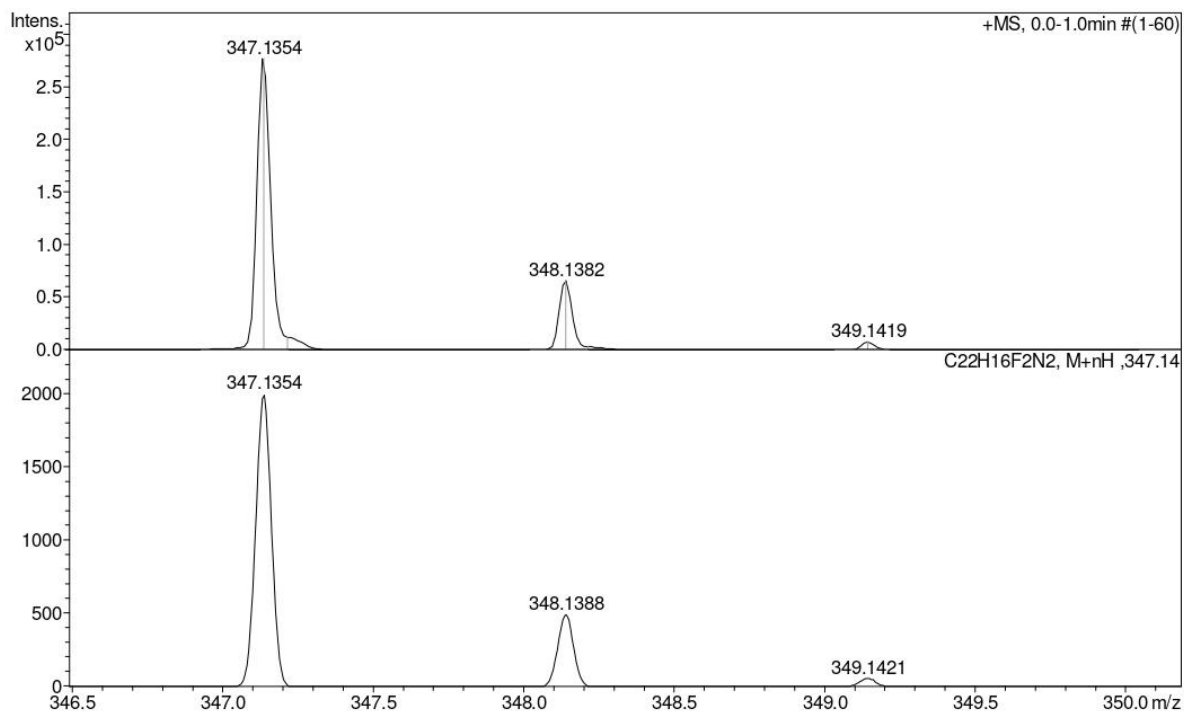

## Display Report

## Analysis Info

Analysis Name D:\Data\Chizhov\Terentiev\Willsg-540\_&clblow.d  
Method tune\_low.m  
Sample Name /TERN SG-540  
Comment CH3CN 100 %, dil. 2000, calibrant added

Acquisition Date 20.06.2022 16:19:31

Operator BDAL@DE  
Instrument / Ser# micrOTOF 10248

## Acquisition Parameter

|             |            |                      |          |                  |           |
|-------------|------------|----------------------|----------|------------------|-----------|
| Source Type | ESI        | Ion Polarity         | Positive | Set Nebulizer    | 0.4 Bar   |
| Focus       | Not active |                      |          | Set Dry Heater   | 180 °C    |
| Scan Begin  | 50 m/z     | Set Capillary        | 4500 V   | Set Dry Gas      | 4.0 l/min |
| Scan End    | 3000 m/z   | Set End Plate Offset | -500 V   | Set Divert Valve | Waste     |

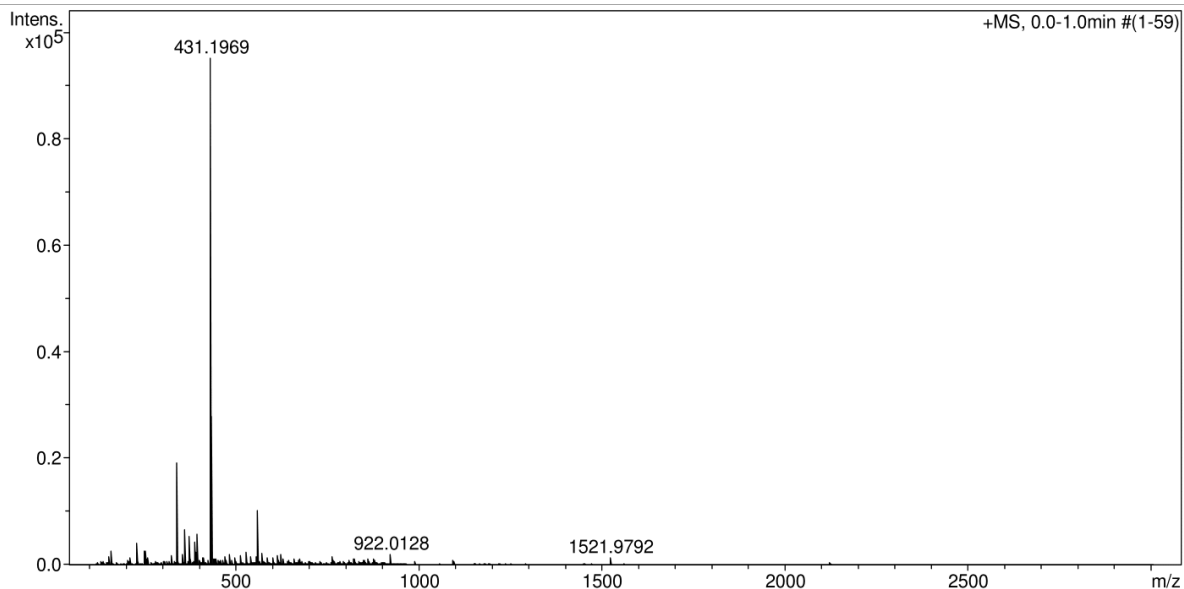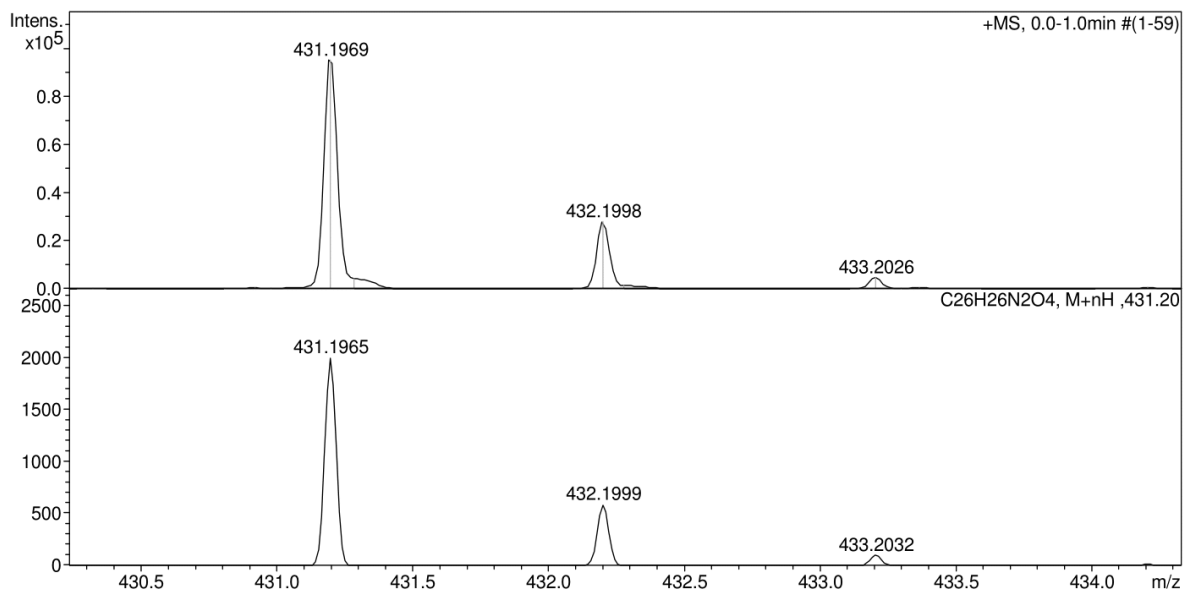

## Display Report

## Analysis Info

Analysis Name D:\Data\Chizhov\Terent'ev\Vi\sb-538\_&clblow.d  
Method tune\_low\_1550.m  
Sample Name /TERN SB-538  
Comment CH3CN 100 %, dil. 20000, calibrant added

Acquisition Date 01.11.2022 13:09:02

Operator BDAL@DE  
Instrument / Ser# maXis 43

## Acquisition Parameter

|             |            |                      |          |                  |           |
|-------------|------------|----------------------|----------|------------------|-----------|
| Source Type | ESI        | Ion Polarity         | Positive | Set Nebulizer    | 0.4 Bar   |
| Focus       | Not active |                      |          | Set Dry Heater   | 180 °C    |
| Scan Begin  | 50 m/z     | Set Capillary        | 4500 V   | Set Dry Gas      | 4.0 l/min |
| Scan End    | 1550 m/z   | Set End Plate Offset | -500 V   | Set Divert Valve | Source    |

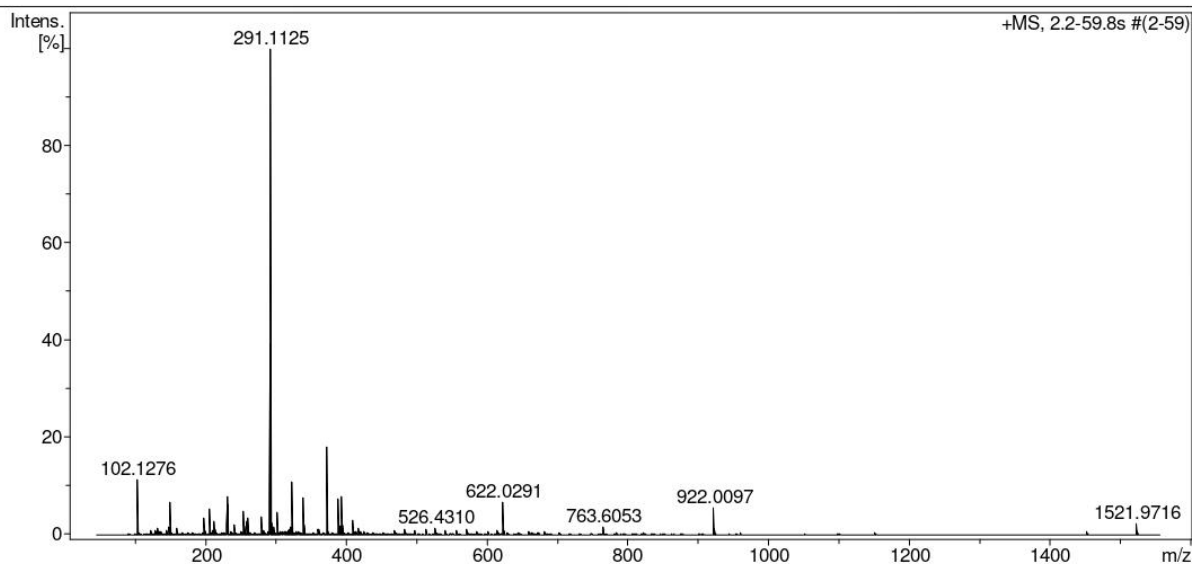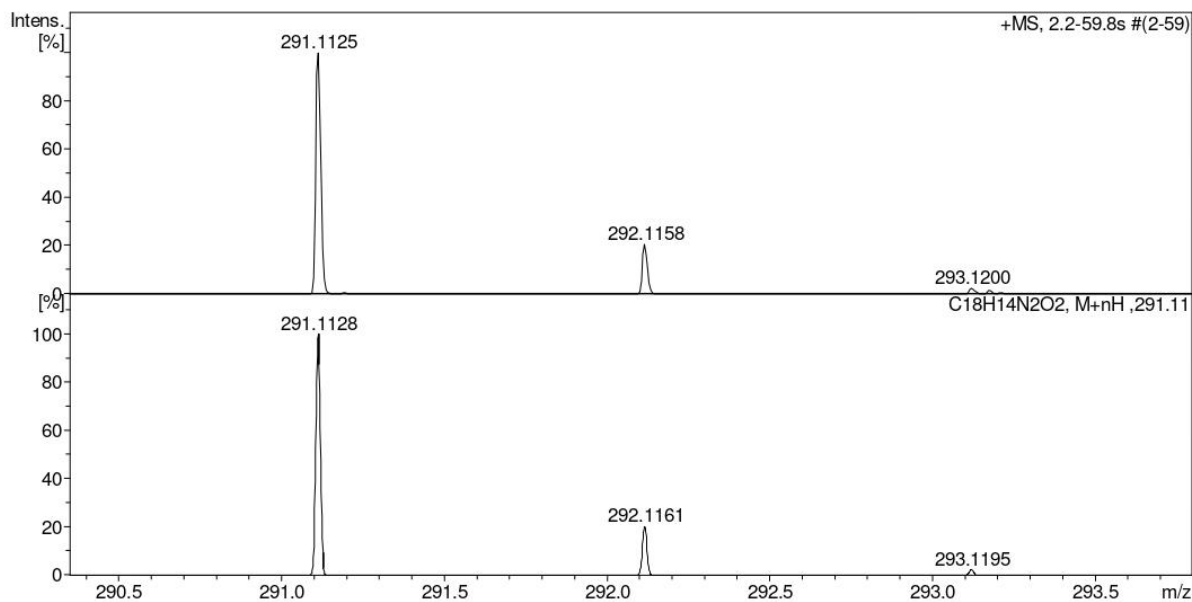

## Display Report

## Analysis Info

Analysis Name D:\Data\Chizhov\Terentiev\Willsg-549\_&clblow.d  
Method tune\_low.m  
Sample Name /TERN SG-549  
Comment CH3CN 100 %, dil. 200, calibrant added

Acquisition Date 27.06.2022 15:49:24

Operator BDAL@DE  
Instrument / Ser# micrOTOF 10248

## Acquisition Parameter

|             |            |                      |          |                  |           |
|-------------|------------|----------------------|----------|------------------|-----------|
| Source Type | ESI        | Ion Polarity         | Positive | Set Nebulizer    | 0.4 Bar   |
| Focus       | Not active |                      |          | Set Dry Heater   | 180 °C    |
| Scan Begin  | 50 m/z     | Set Capillary        | 4500 V   | Set Dry Gas      | 4.0 l/min |
| Scan End    | 3000 m/z   | Set End Plate Offset | -500 V   | Set Divert Valve | Waste     |

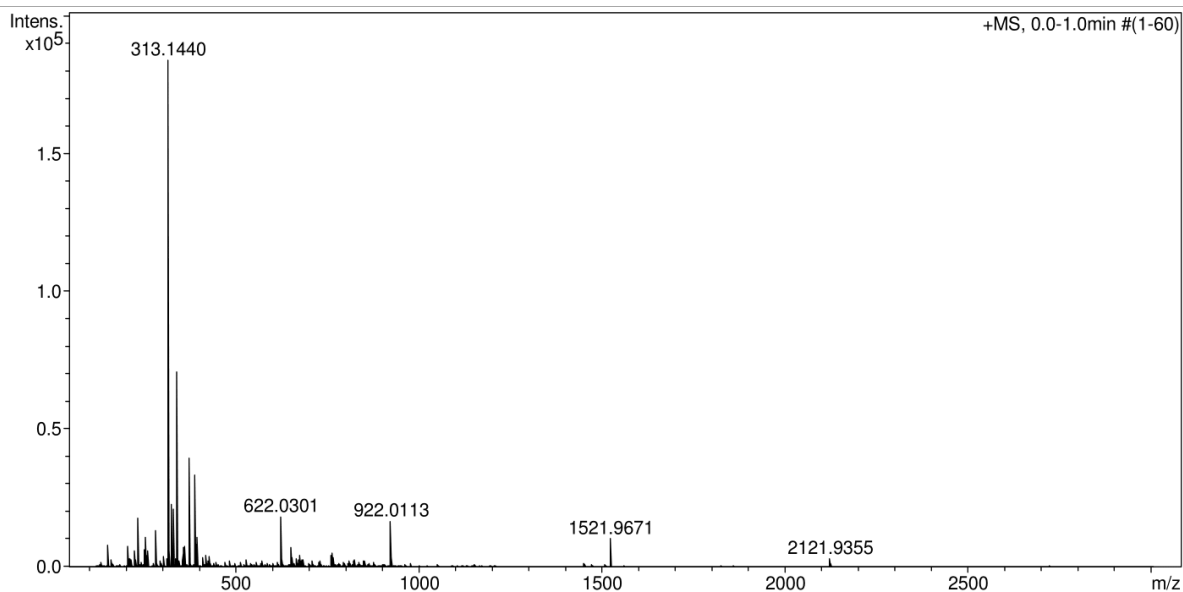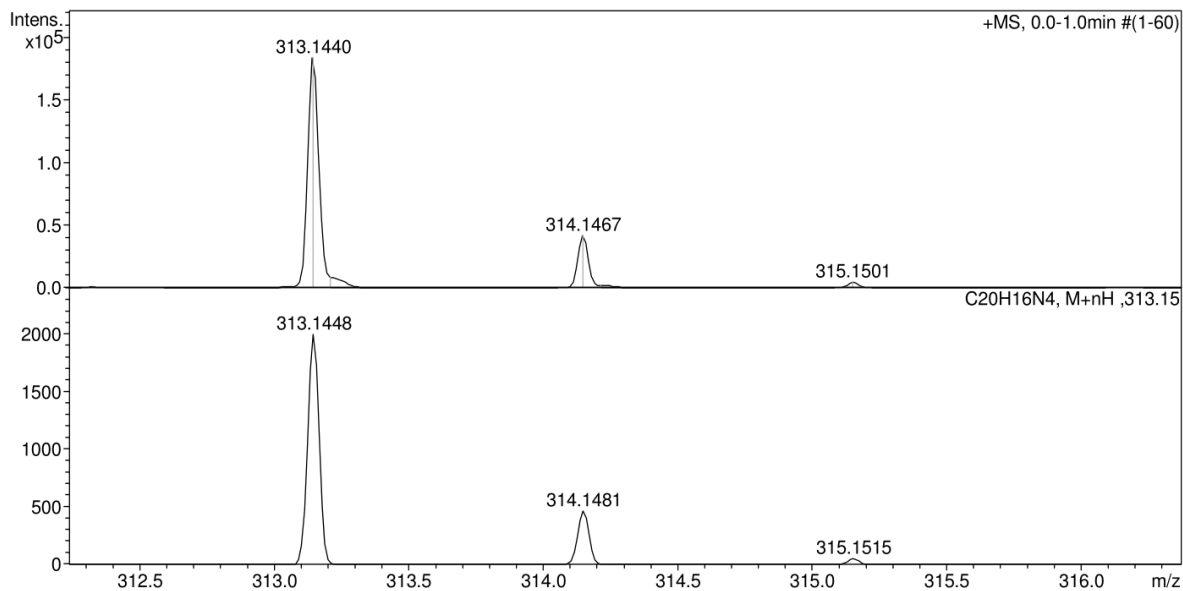

# IR spectra of synthesized compounds

## IR of 3a

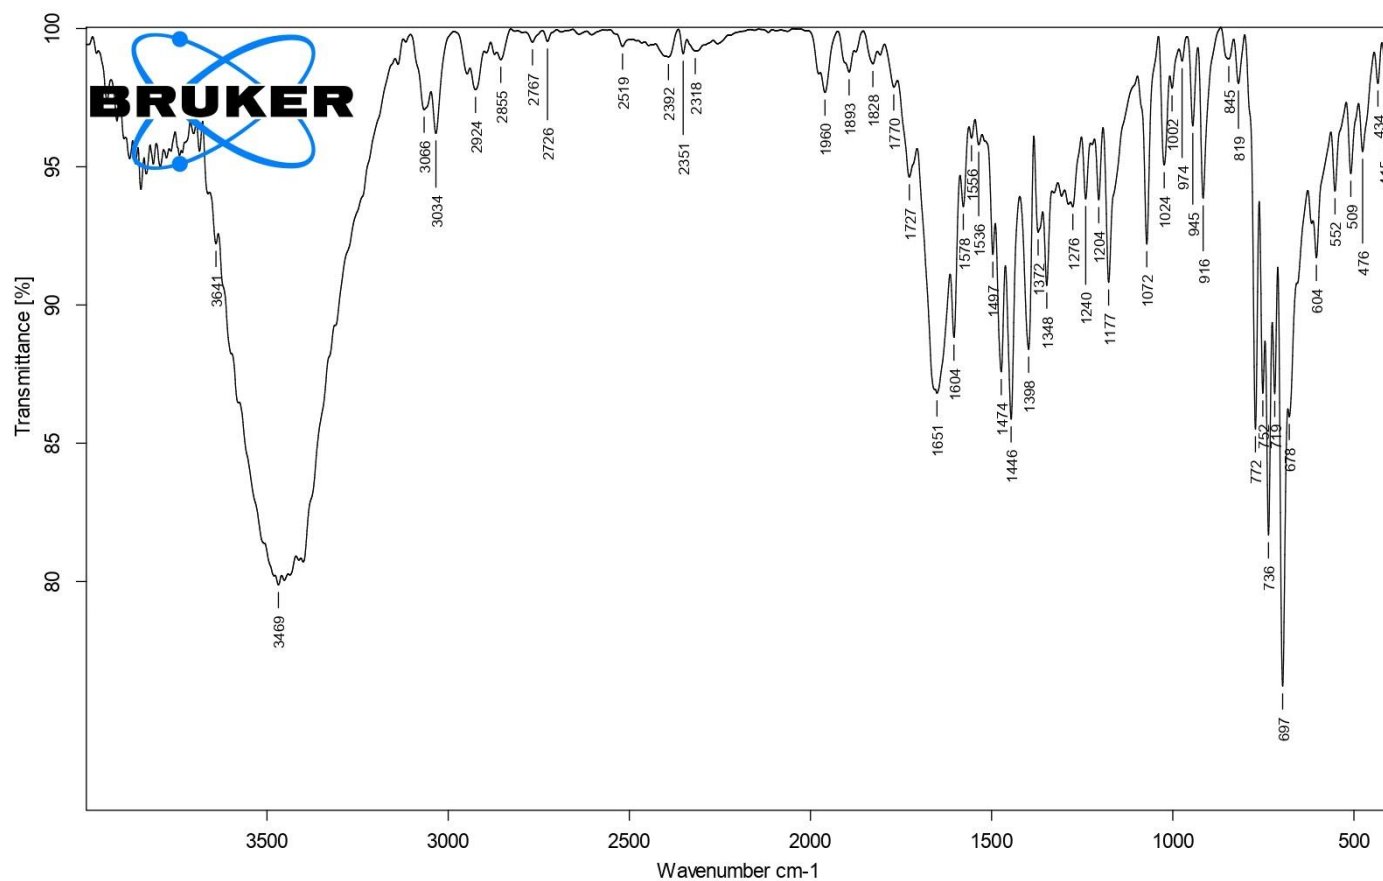

## IR of 3b

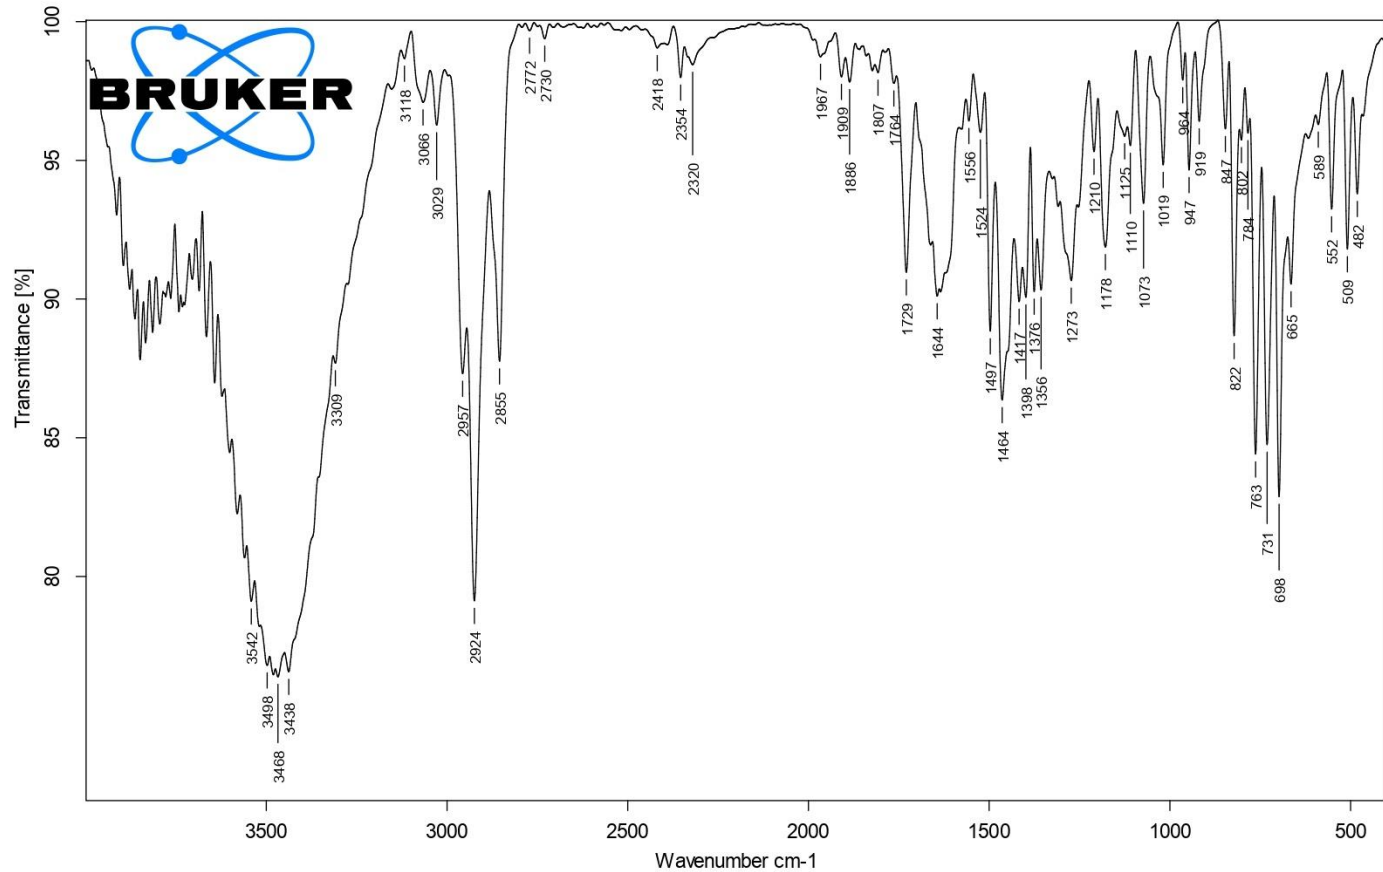

IR of 3c

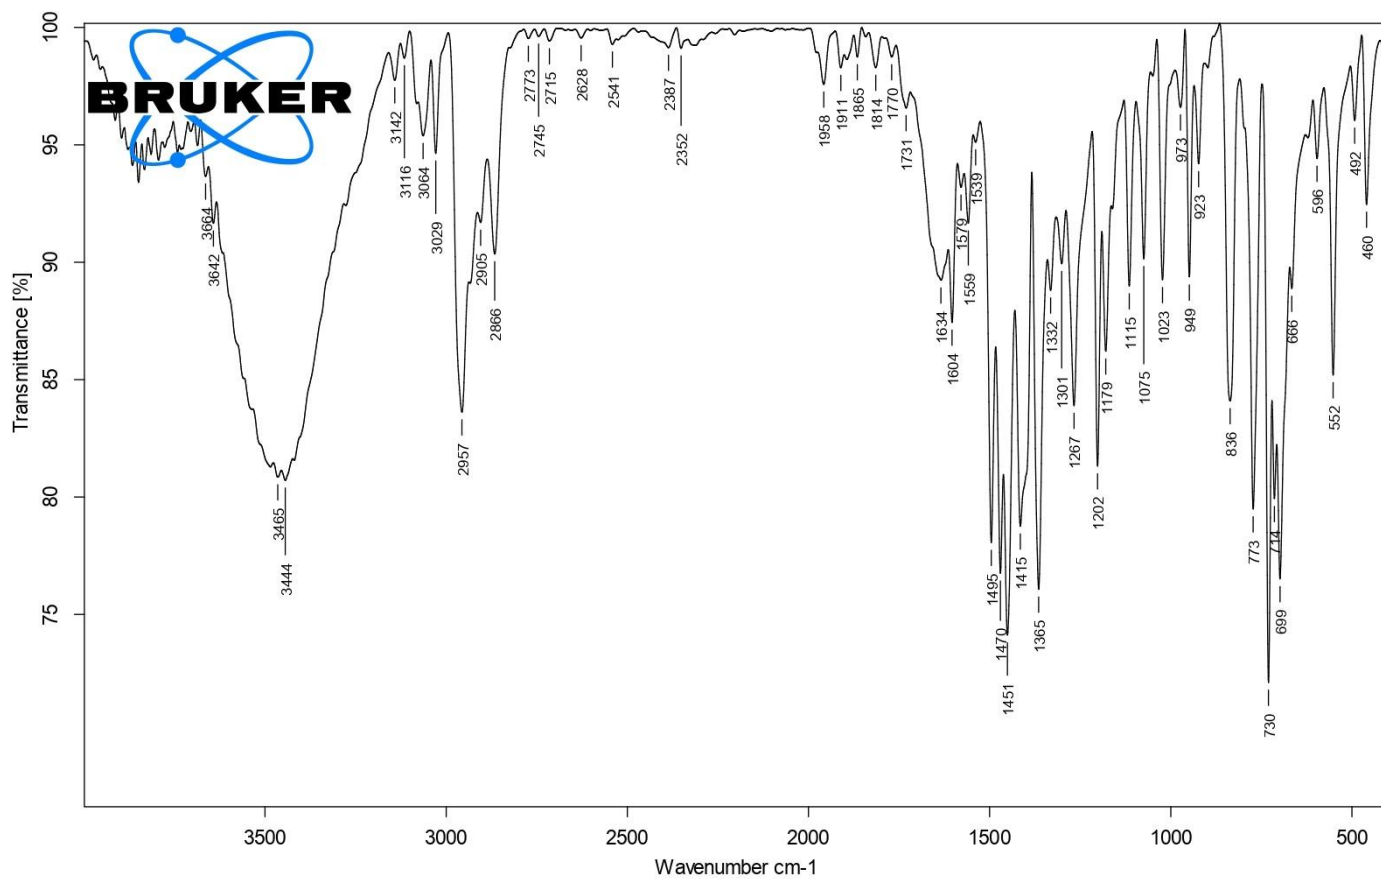

IR of 3d

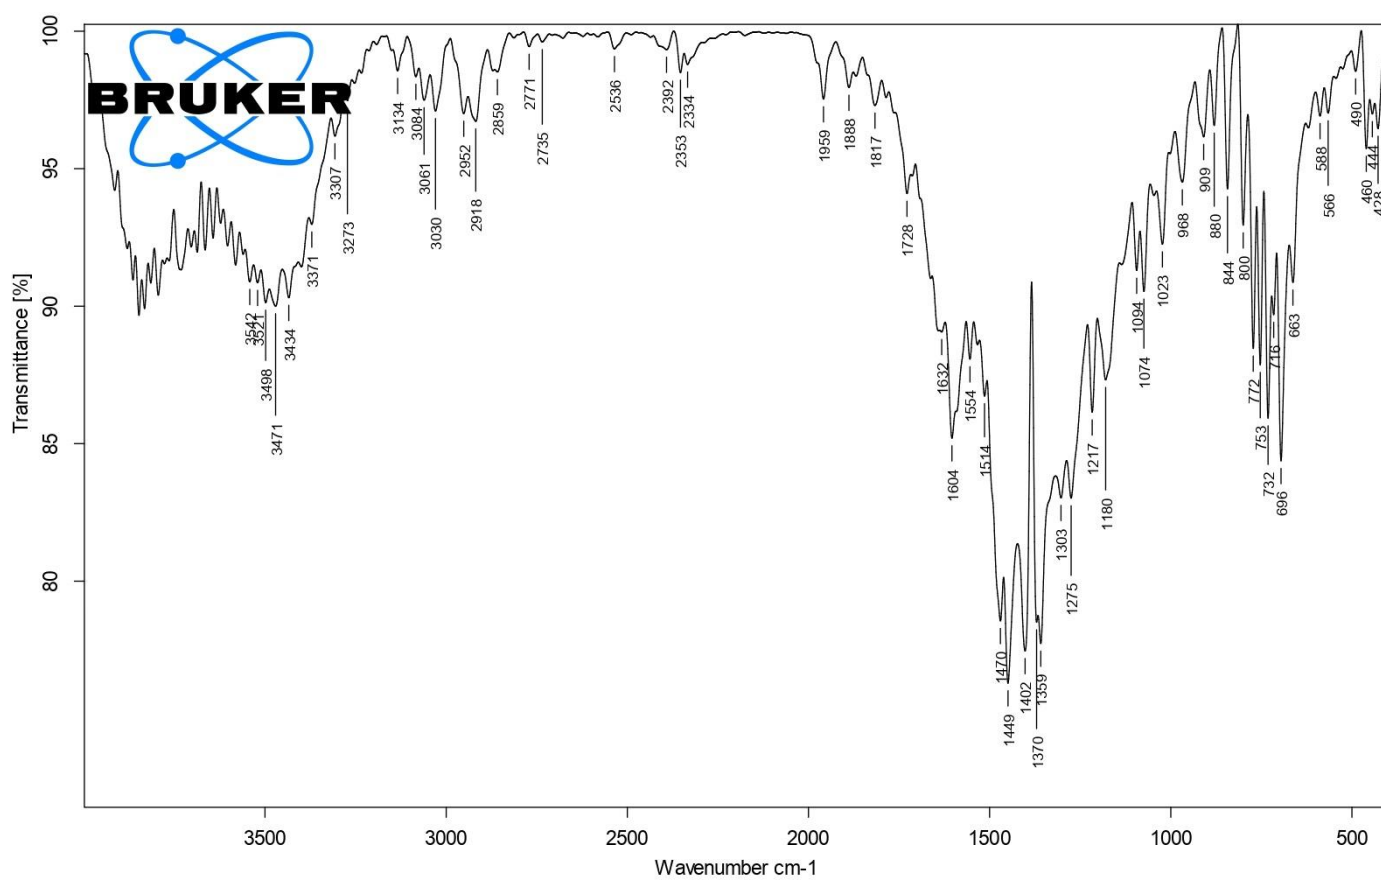



### IR of 3e

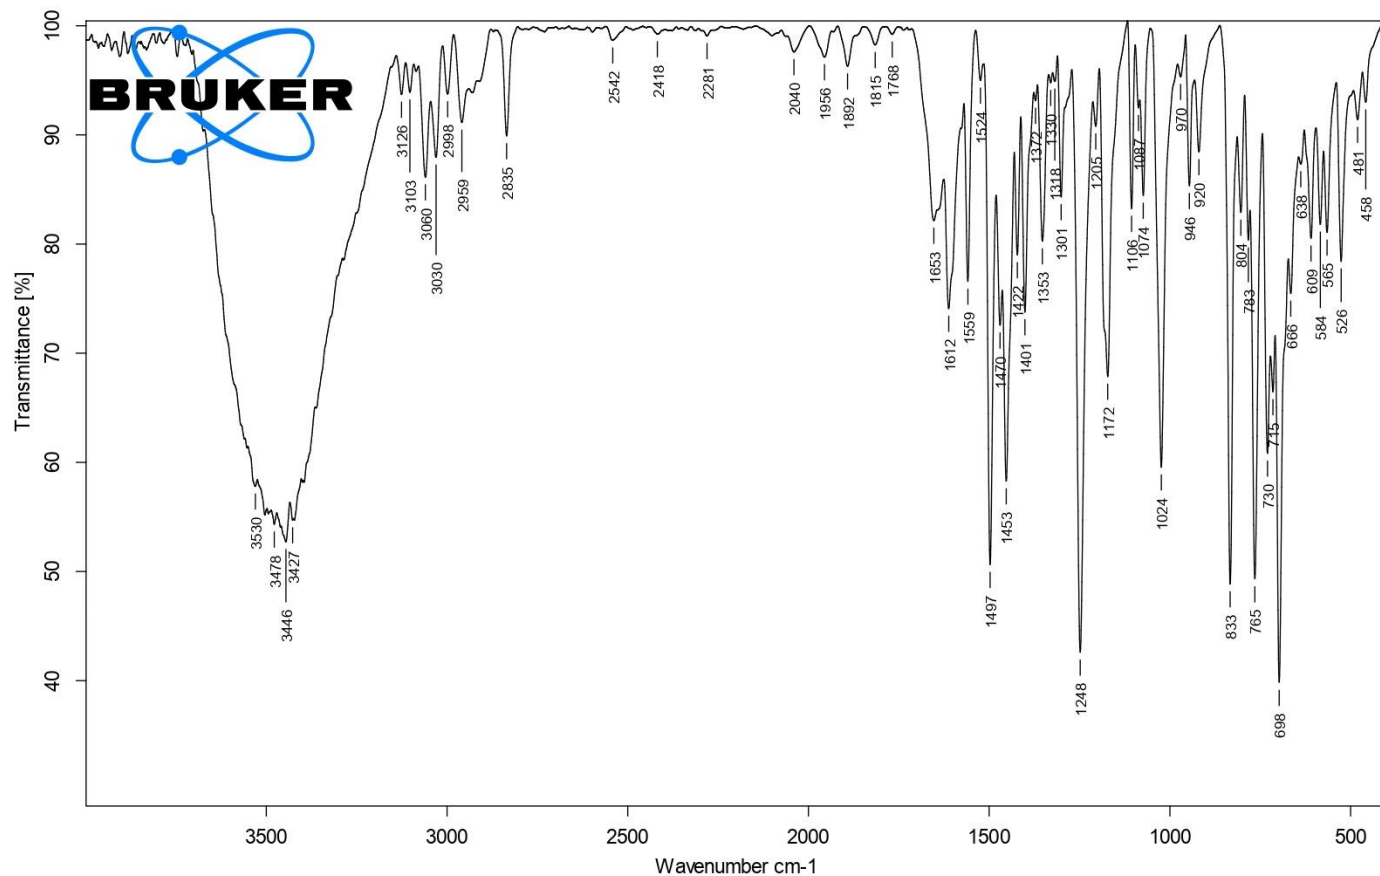

### IR of 3f

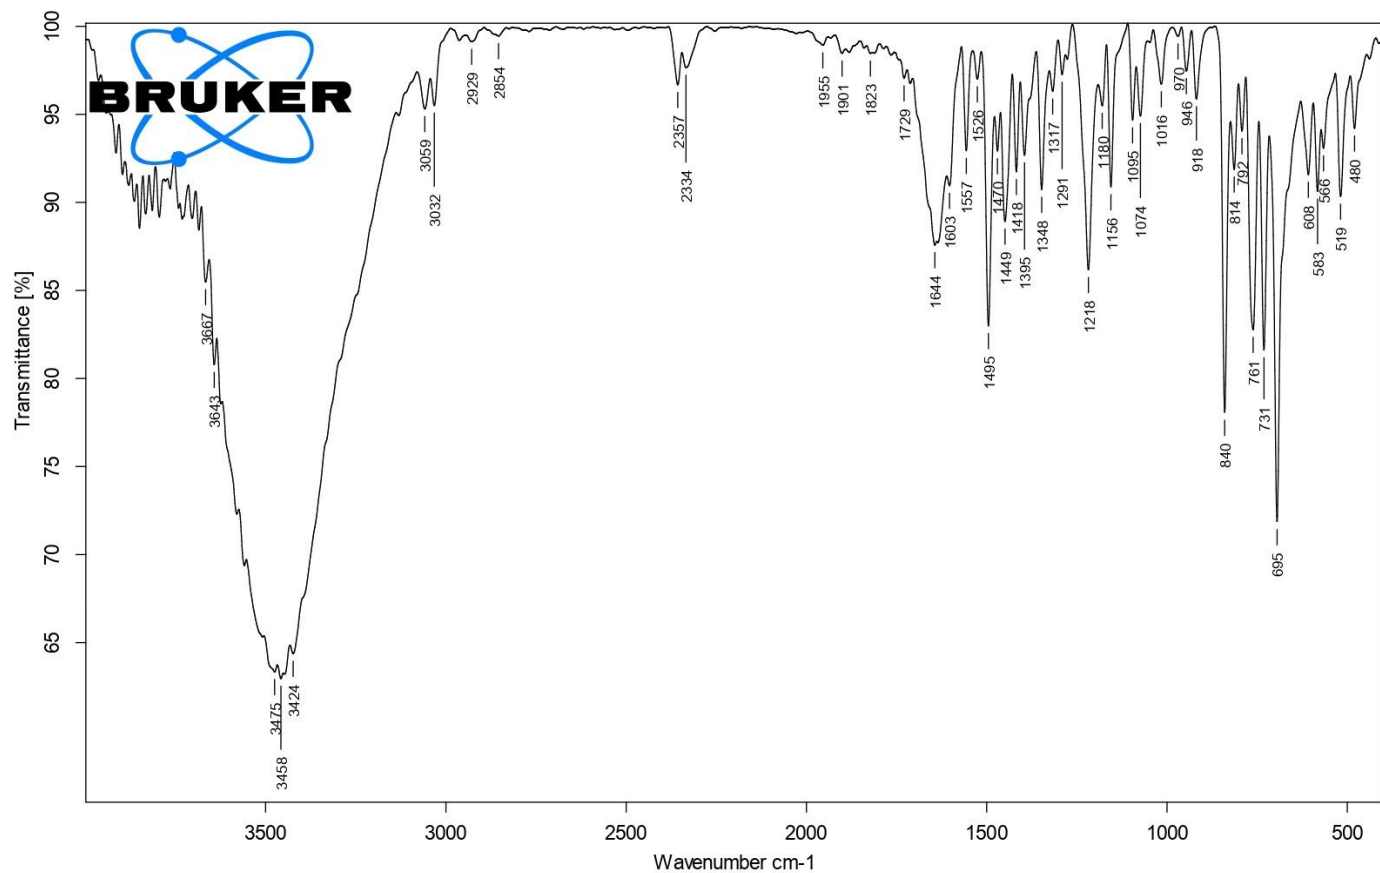

### IR of 3g

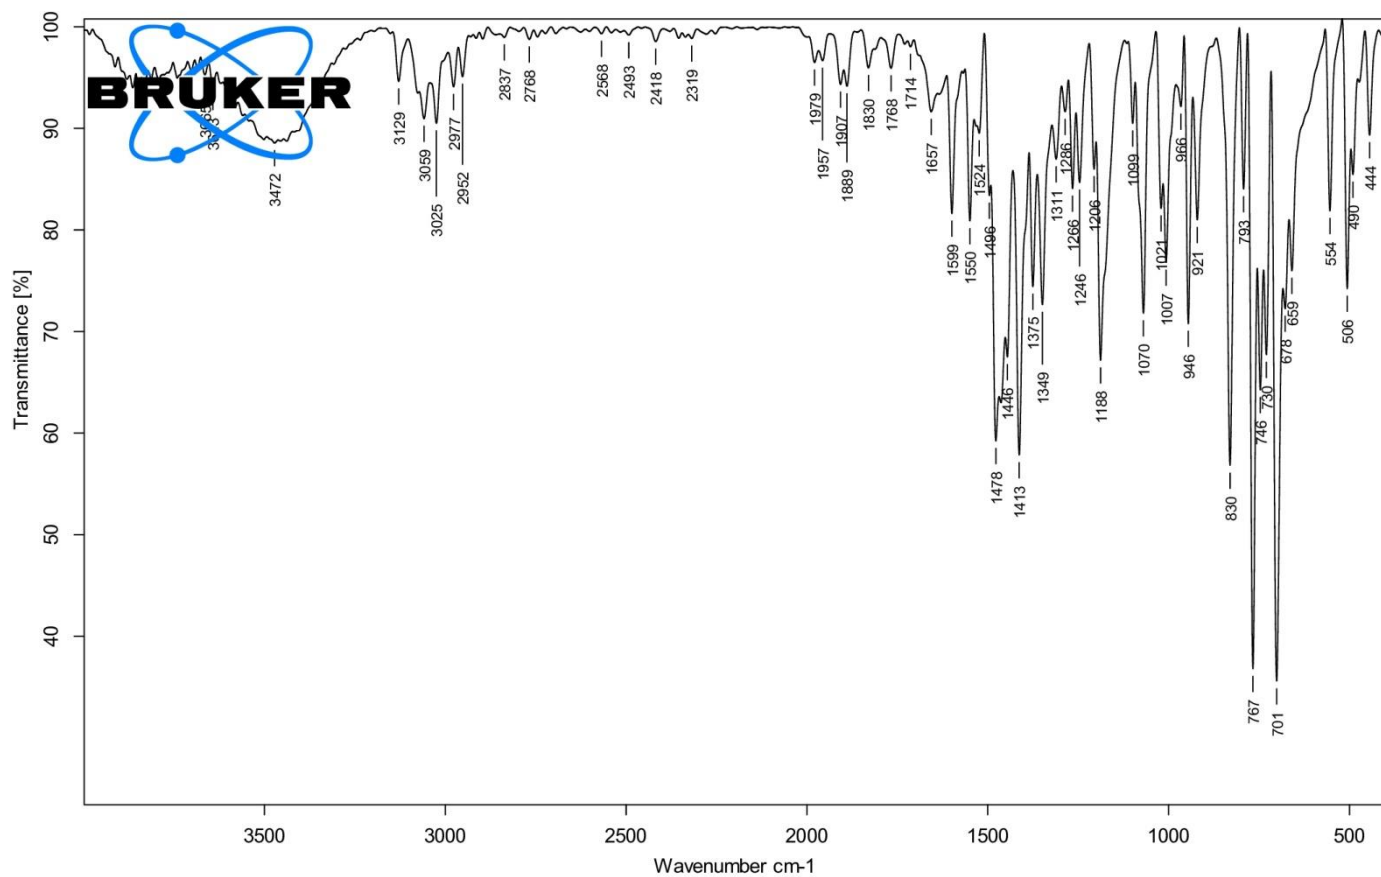

### IR of 3h

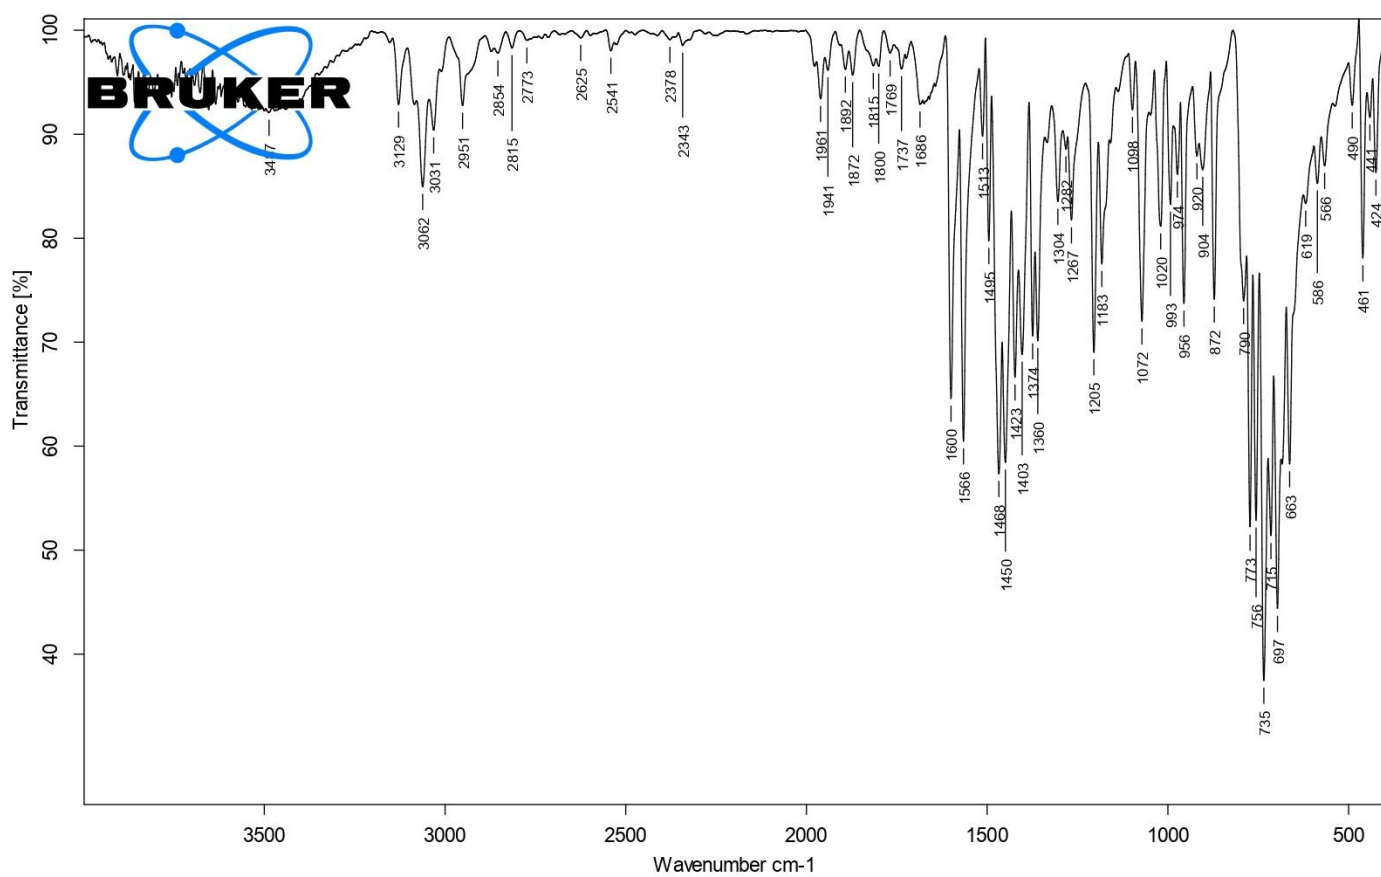

### IR of 3i

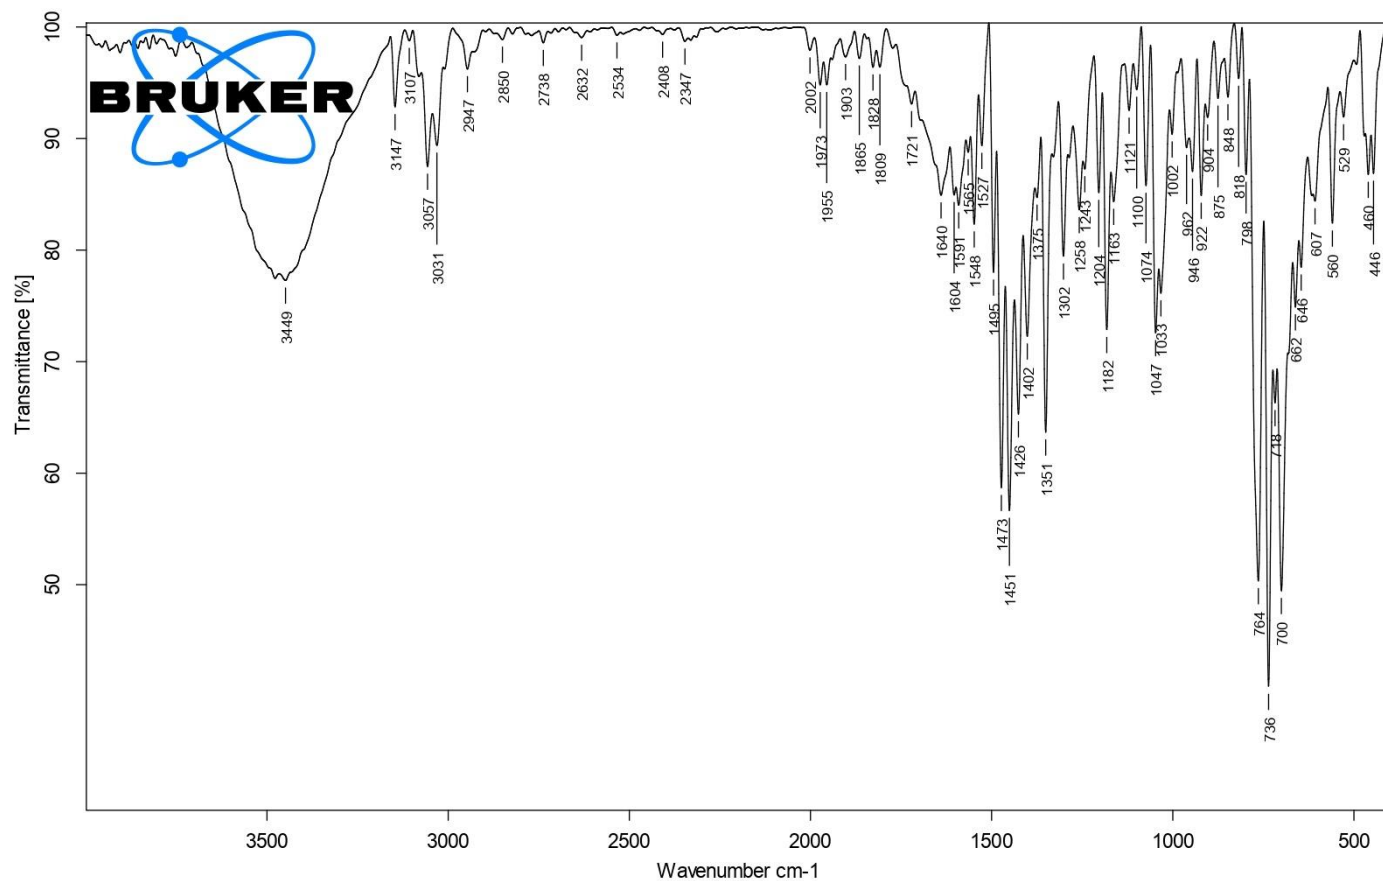

### IR of 3j

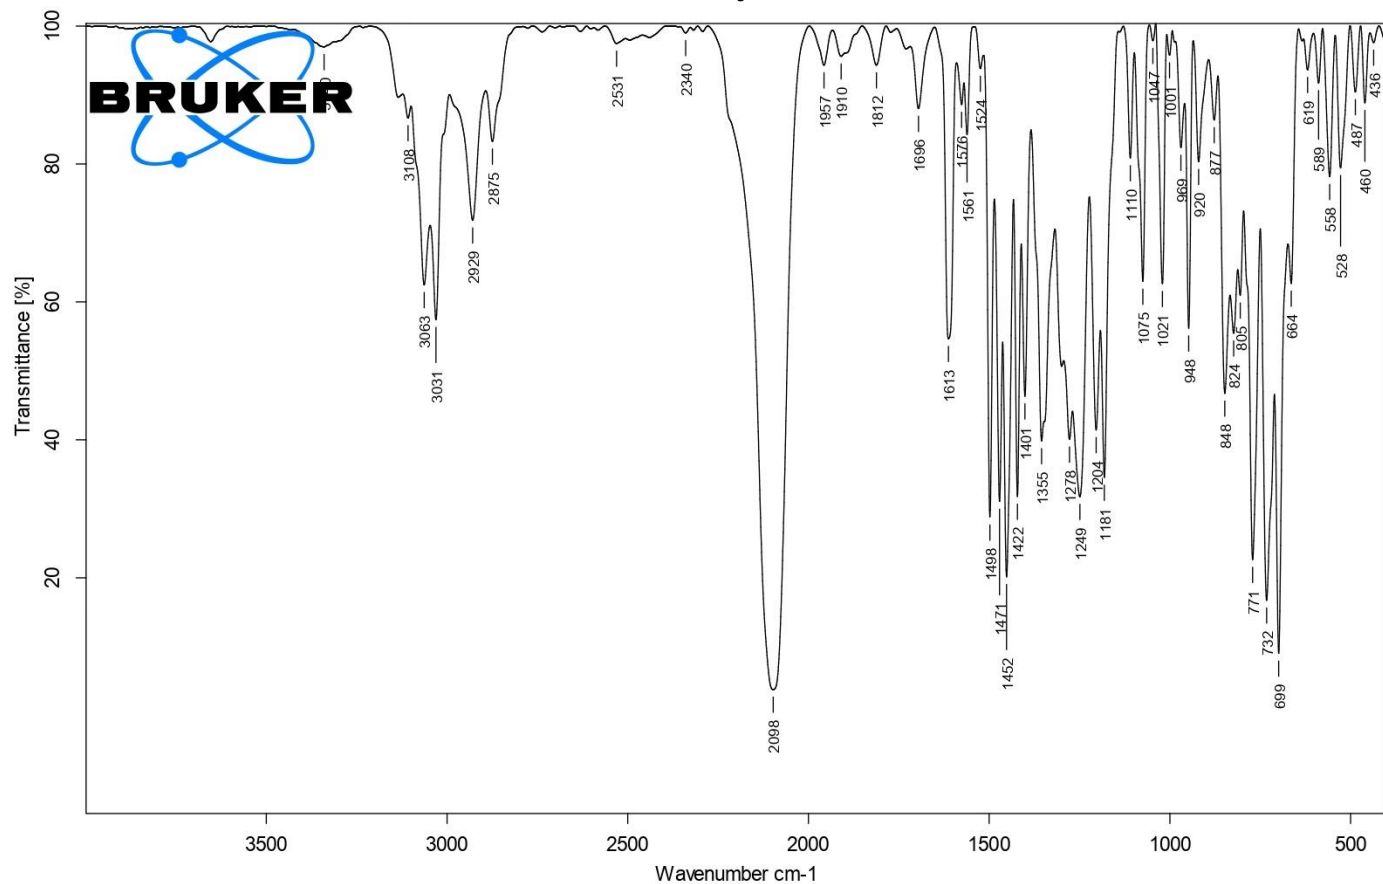

IR of 3l

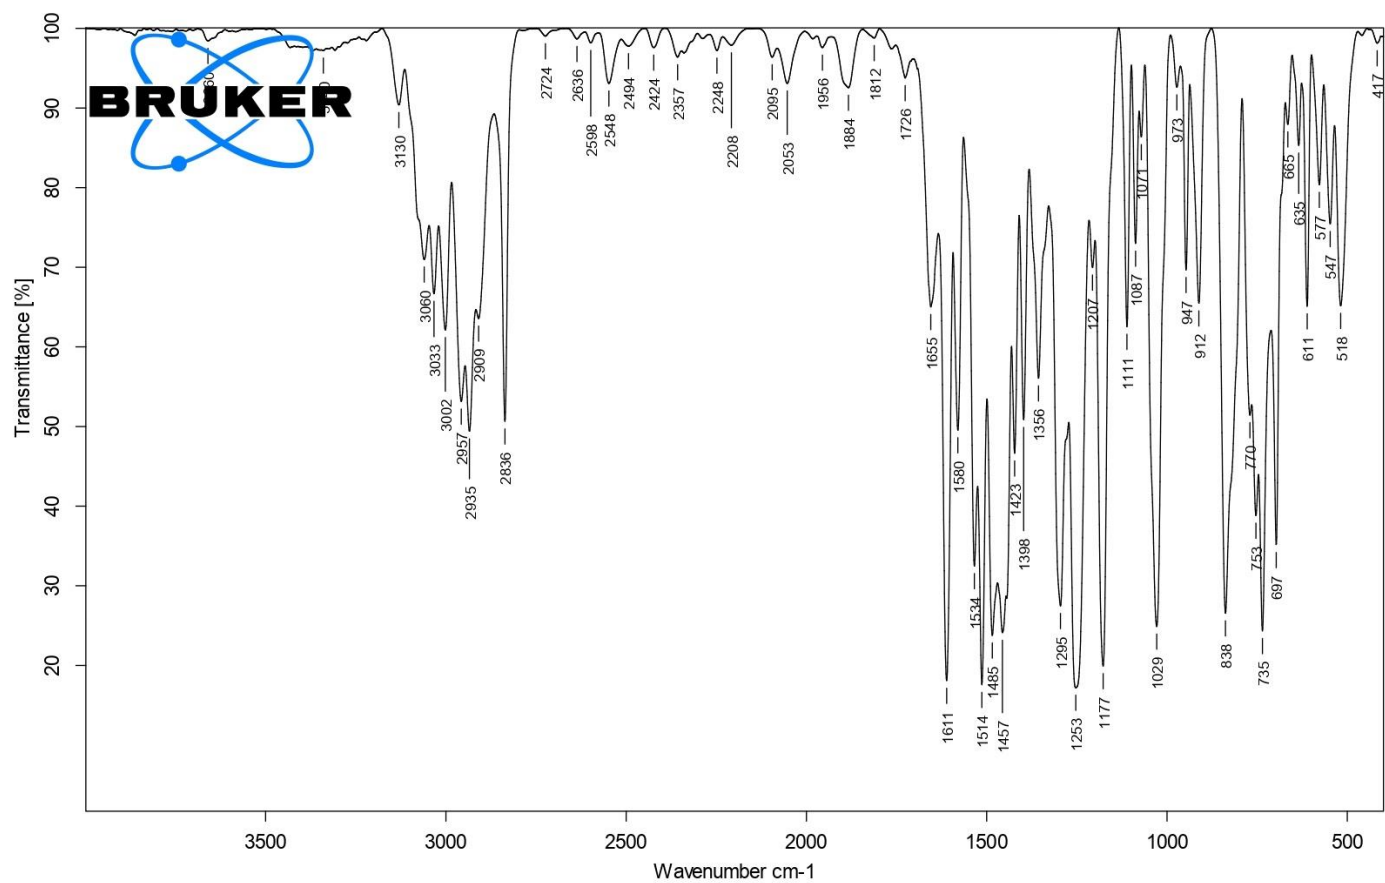

IR of 3m

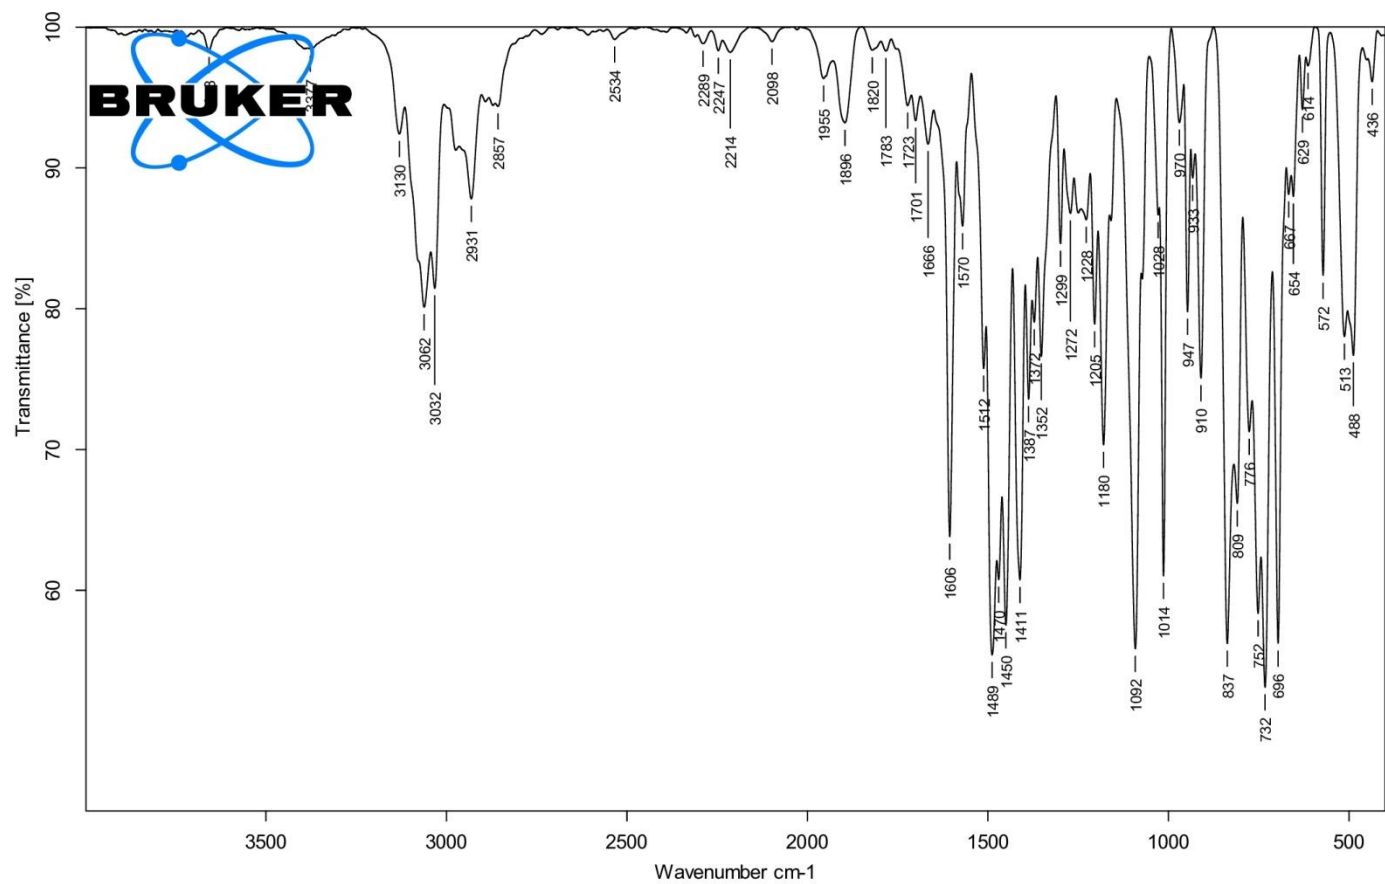

IR of 3n

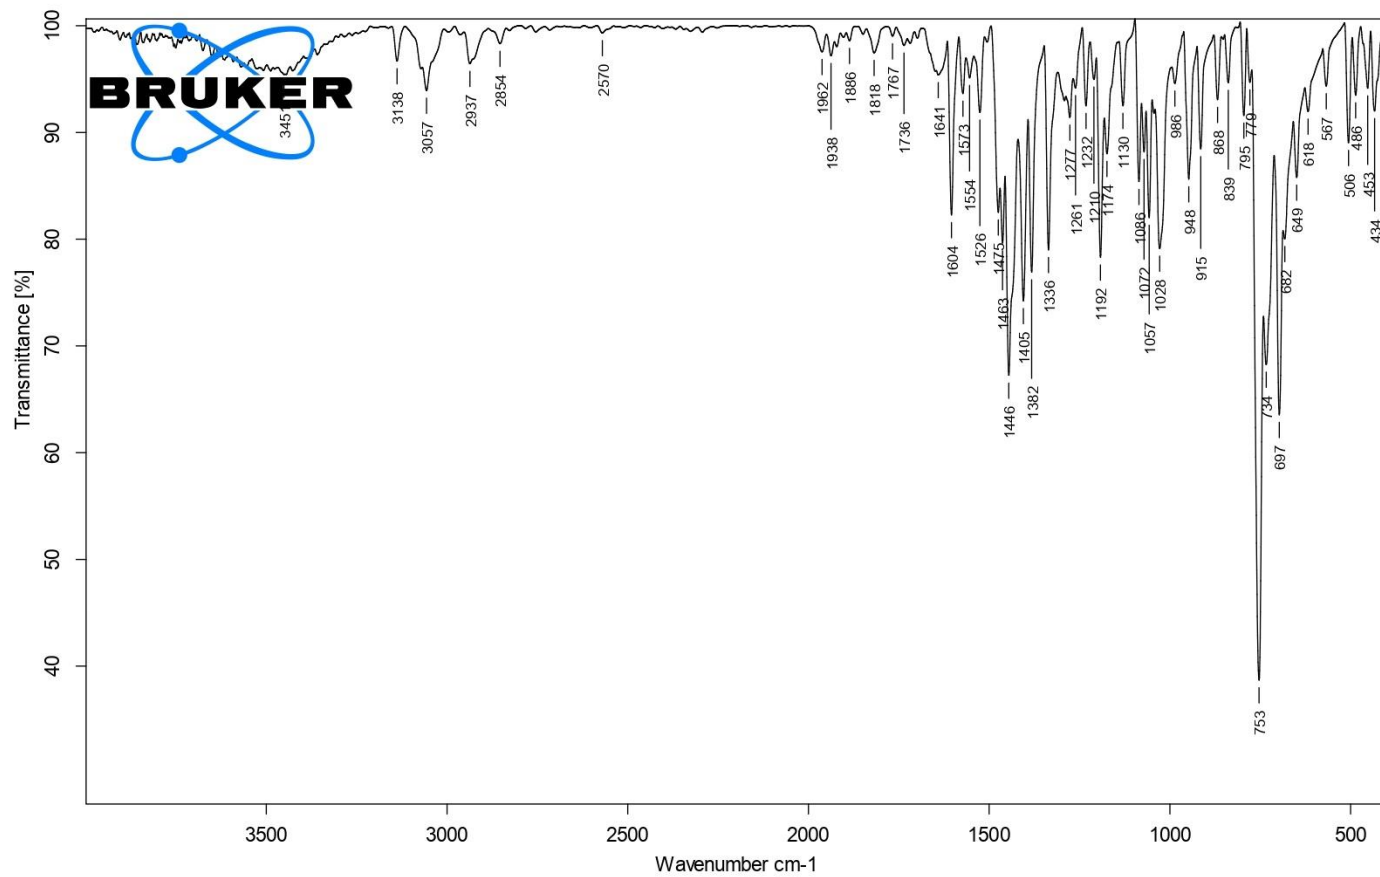

IR of 3o

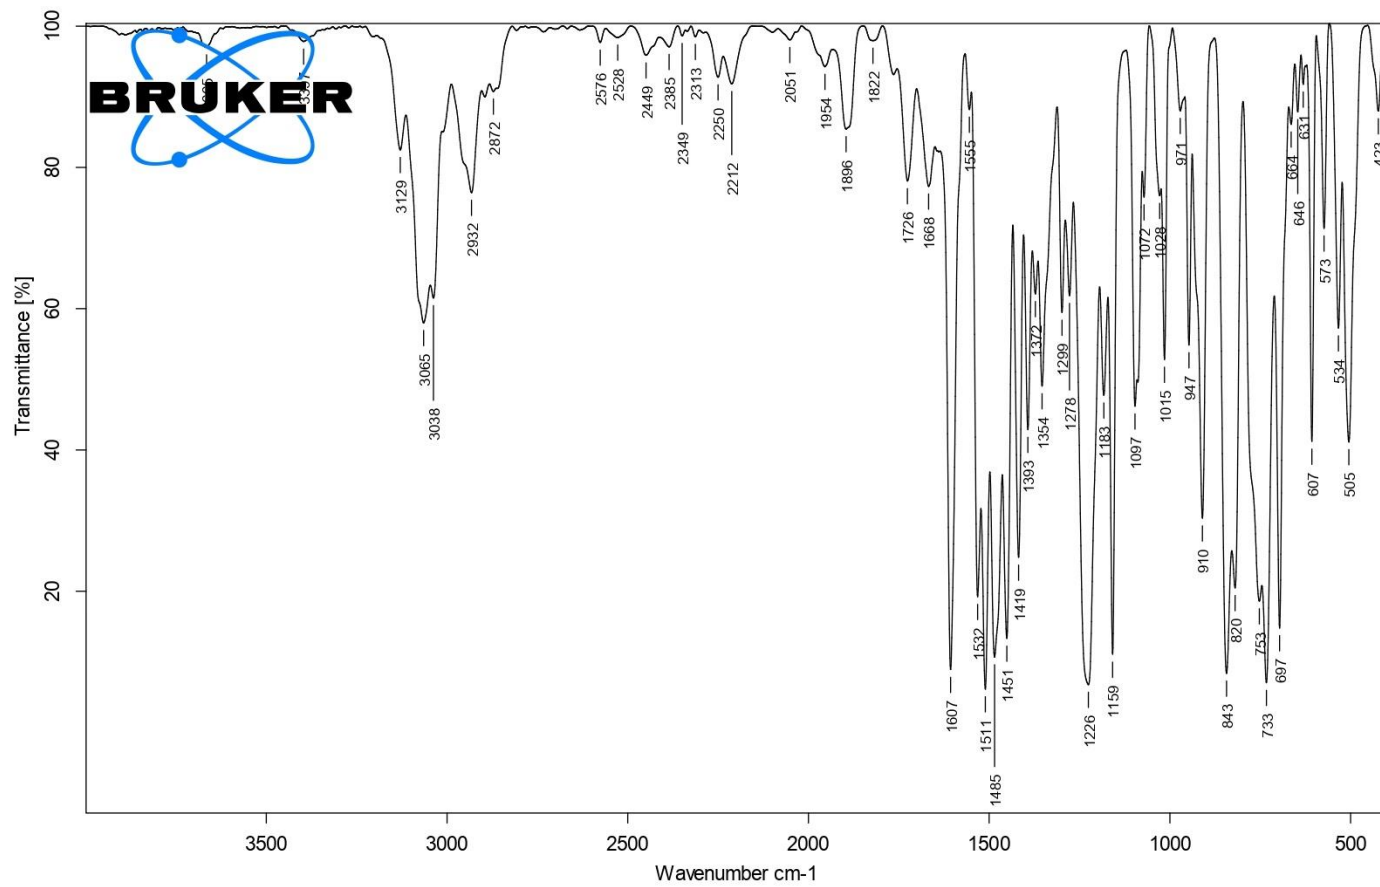

### IR of 3p

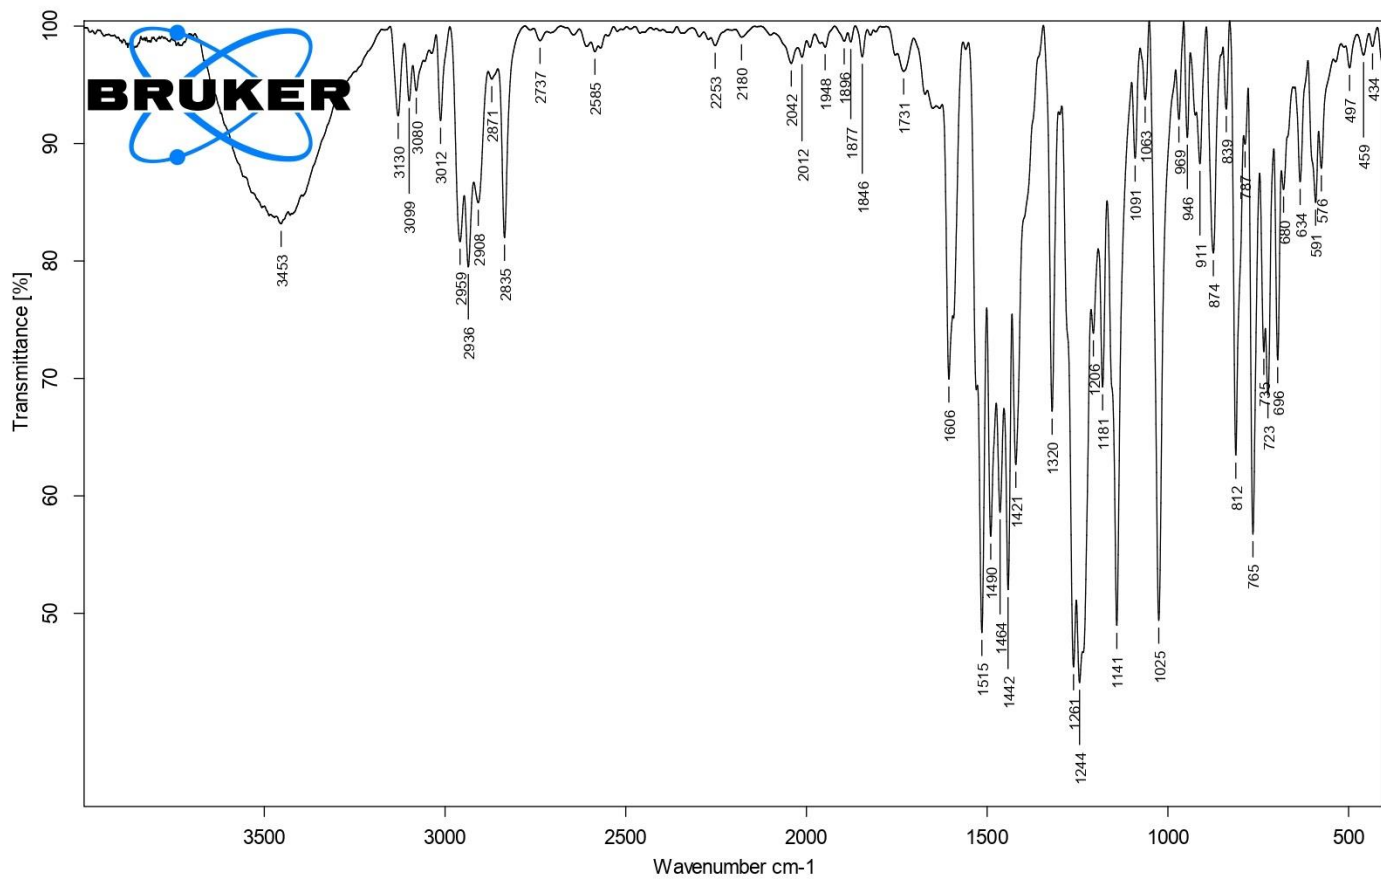

### IR of 3q

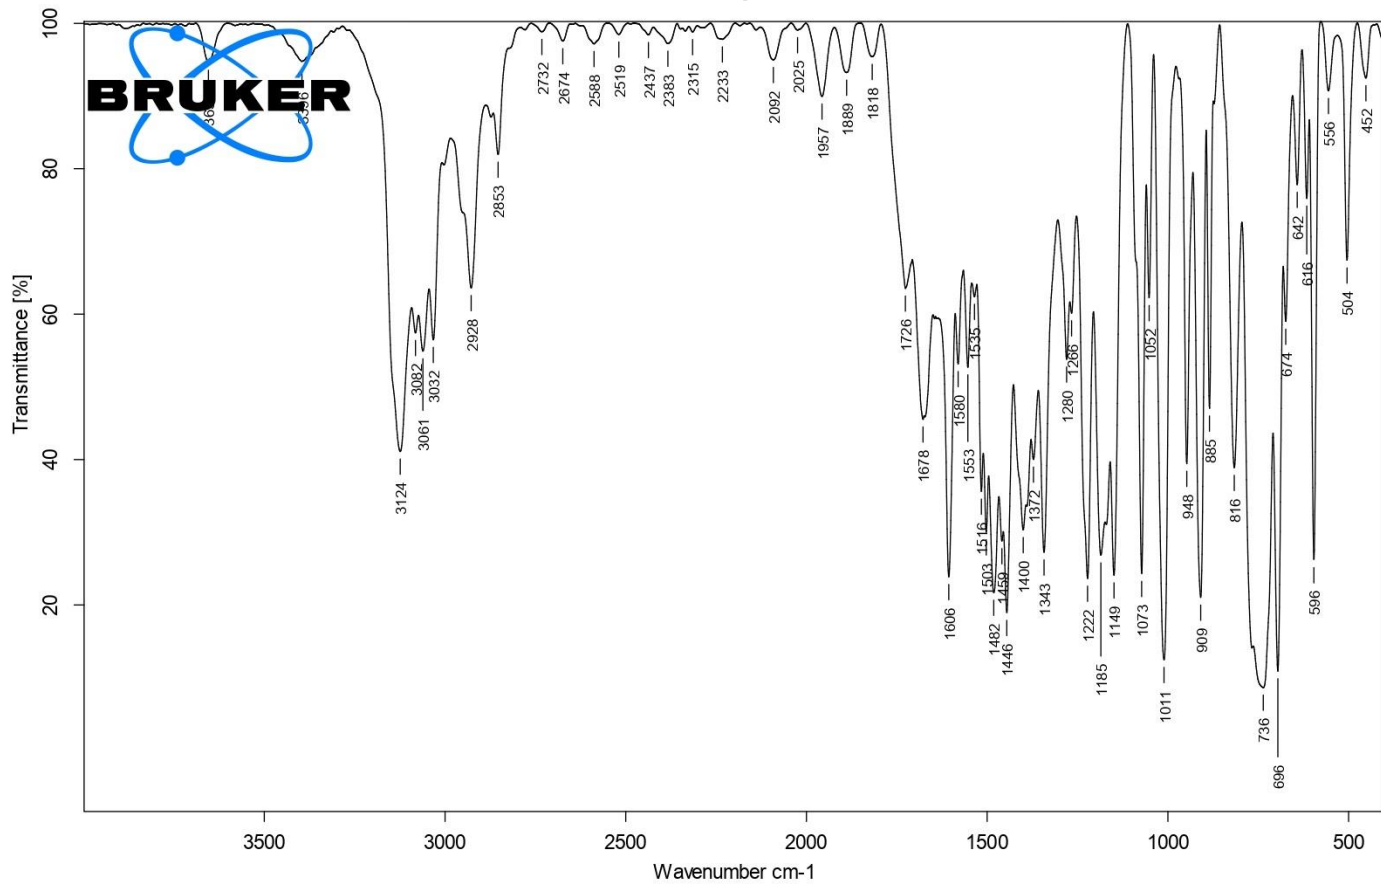



# IR of 3r

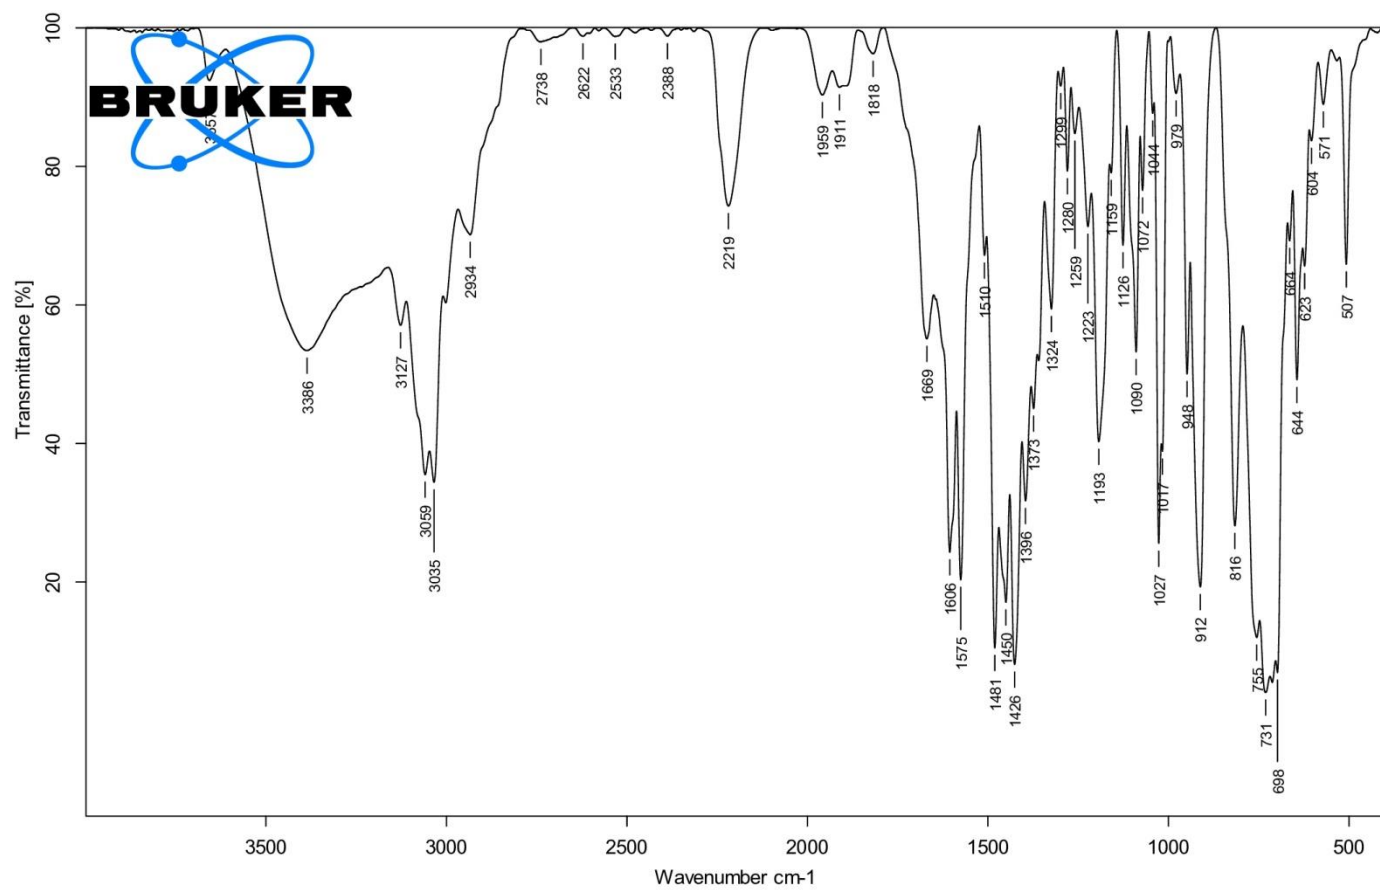

Supplement: s1 [file s1]
